# Supplementary material
Source: publisher figshare collection journal article supplement (https://diabetesjournals.figshare.com/ndownloader/files/31117444)
Supplement: Supplementary file 1 [file 31117444]

## Sheet: Table of content
Table of Content Supplemental Tables
Table S1. Charactristics of genotyping, imputation platform and proteomic measurement platform for the five proteomic GWAS and the type 1 diabetes GWAS meta-analysis
Table S2. Two sample MR results using directly matched sentinel cis-pQTLs from five large proteomic studies and their proxies
Table S3. Associations of eQTL rs2281808 (cis-pQTL for SIRPG) with SIRPG expression and with other traits using PhenoScanner
Table S4. Associations of eQTL rs6043409 (cis-pQTL for SIRPG) with SIRPG expression and with other traites using PhenoScanner
Table S5. Associations of eQTL rs181209 (cis-pQTL for IL27.EBI3) with IL27.EBI3 expression and with other traites using PhenoScanner
Table S6. Associations of eQTL rs8051363 (cis-pQTL for CTRB1) with other traits using PhenoScanner
Table S7. MR power calculation
Table S8. Validation of commercial ELISA assays for the 3 proteins
Table S9A. MR analysis of the effect of CTRB1 on type 1 diabetes using both cis and trans-pQTLs.
Table S9B. Sensitivity MR analyses for detection of pleiotropy in the multi-SNP MR for CTRB1
Table S10. Assesment of association of cis-pQTL for the three candidate proteins with nearby protein altering variants (PAV)

## Sheet: Table S1
Table S1. Charactristics of genotyping, proteomic platform or measurements with imputation information for five proteomic GWAS and type 1 diabetes meta-analysis
Study	Genotyping Platform	Proteomic platform/proteomic measurements	*MAF	Imputation Software	Variants after imputation
Proteomic
Sun	Affymetrix Axiom	multiplexed aptamer-based affinity proteomics	> 5%	Sanger Imputation Server	8769688
Emilsson	Affymetrix, Illumina	multiplexed aptamer-based affinity proteomics	> 5%	NA	NA
Folkersen	Affymetrix, Illumina	Olink platform	> 5%	NA	~20.3 million variants
Suhre	Affymetrix Axiom	multiplexed aptamer-based affinity proteomics	> 5%	NA	1221345
Yao	Affymetrix 500K, Illumina Human Exome	multiplexed aptamer-based affinity proteomics	> 4%	MACH	~30 million variants
Type 1 diabetes meta-analysis GWAS
Forgetta	Affymetrix and Illumina		<5%	Sanger Imputation Server	9061522
* MAF denotes to minor allele frequency before imputation
HRC denotes Haplotype Reference Consortium
NA denotes to not available

## Sheet: Table S2
Table S2. Two sample MR results using directly matched sentinel cis-pQTLs from five large proteomic studies and their proxies used in MR
Protein	SNP	ProxySNP	Study	Method	No.SNP	MR Beta	MR Se	MR P-value	MR OR	MR 95%CI lower bound	MR 95% CI upper bound	Consequence	IMPACT	SYMBOL	BIOTYPE	SIFT	PolyPhen	CADD_PHRED	CADD_RAW
SIRPG	rs2281808		Emilsson	Wald ratio	1	0.506	0.102	7.07e-07	1.659	1.358	2.026	intron_variant	MODIFIER	SIRPG	protein_coding	-	-	1.223	-0.018542
SIRPG.9241.40.3	rs6043409		Sun	Wald ratio	1	0.466	0.096	1.05829e-06	1.594	1.322	1.922	missense_variant	MODERATE	SIRPG	protein_coding	tolerated(1)	benign(0)	0.957	-0.070068
IL27.EBI3.2829.19.2	rs181209		Sun	Wald ratio	1	0.678	0.146	3.72049e-06	1.969	1.478	2.624	intron_variant	MODIFIER	IL27	protein_coding	-	-	1.054	-0.049852
CTRB1.5671.1.3	rs8051363		Sun	Wald ratio	1	-0.18	0.04	6.08956e-06	0.835	0.772	0.903	intron_variant	MODIFIER	CTRB1	protein_coding	-	-	0.71	-0.132441
CTRB1	rs8051363		Emilsson	Wald ratio	1	-0.223	0.049	6.09e-06	0.8	0.727	0.881	intron_variant	MODIFIER	CTRB1	protein_coding	-	-	0.71	-0.132441
SLPI	rs2743334		Emilsson	Wald ratio	1	0.658	0.199	0.0009553	1.931	1.307	2.854	downstream_gene_variant	MODIFIER	MATN4	protein_coding	-	-	3.375	0.221831
B4GALT1.13381.49.3	rs7019909		Sun	Wald ratio	1	-0.29	0.088	0.000977394	0.748	0.63	0.889	3_prime_UTR_variant	MODIFIER	B4GALT1	protein_coding	-	-	12.79	1.10151
NAAA	rs4859571		Suhre	Wald ratio	1	-0.1261	0.0389	0.00117647	0.8815	0.8169	0.9513	missense_variant	MODERATE	NAAA	protein_coding	tolerated(1)	benign(0.003)	0.001	-1.30129
NRP1	rs2253918		Emilsson	Wald ratio	1	-0.299	0.094	0.00145419	0.742	0.617	0.891	intron_variant	MODIFIER	NRP1	protein_coding	-	-	0.265	-0.333239
NRP1.3214.3.2	rs2506149		Sun	Wald ratio	1	-0.273	0.087	0.0017171	0.761	0.642	0.903	intron_variant	MODIFIER	NRP1	protein_coding	-	-	0.89	-0.085246
CTSS	rs72702561		Emilsson	Wald ratio	1	-0.171	0.055	0.00198534	0.843	0.756	0.939	intron_variant	MODIFIER	HORMAD1	protein_coding	-	-	0.401	-0.248754
TRANCE	rs4512994		Folkersen	Wald ratio	1	-0.597	0.196	0.00231285	0.551	0.375	0.808	intron_variant,non_coding_transcript_variant	MODIFIER	LINC02341	lncRNA	-	-	2	0.089699
MRC2	rs2465430		Emilsson	Wald ratio	1	0.799	0.27	0.00307717	2.223	1.31	3.773	synonymous_variant	LOW	MRC2	protein_coding	-	-	0.89	-0.08529
B4GALT1	rs60988380		Emilsson	Wald ratio	1	-0.531	0.181	0.00343328	0.588	0.412	0.839	intron_variant	MODIFIER	B4GALT1	protein_coding	-	-	8.042	0.655476
CRLF1	rs2238647		Emilsson	Wald ratio	1	-0.312	0.107	0.00355651	0.732	0.594	0.903	missense_variant	MODERATE	CRLF1	protein_coding	tolerated(0.27)	probably_damaging(0.992)	12.37	1.06203
ARFIP1.13488.3.3	rs4619875		Sun	Wald ratio	1	-0.292	0.1	0.00358548	0.746	0.613	0.909	upstream_gene_variant	MODIFIER	TIGD4	protein_coding	-	-	7.886	0.63891
CD55	rs12134133		Suhre	Wald ratio	1	-0.1403	0.0485	0.00379476	0.8691	0.7904	0.9557	intron_variant,non_coding_transcript_variant	MODIFIER	-	lncRNA	-	-	0.974	-0.06632
ANXA2	rs36032232		Suhre	Wald ratio	1	0.0991	0.0342	0.00379668	1.1041	1.0325	1.1808	downstream_gene_variant	MODIFIER	RORA	protein_coding	-	-	4.898	0.352966
ADAMTS13	rs28493251		Emilsson	Wald ratio	1	-0.174	0.06	0.00380708	0.84	0.747	0.945	5_prime_UTR_variant	MODIFIER	STKLD1	protein_coding	-	-	11.95	1.0262
VEGFC.3132.1.1	rs41278571		Sun	Wald ratio	1	0.204	0.071	0.00397839	1.226	1.067	1.408	missense_variant	MODERATE	VEGFC	protein_coding	deleterious(0)	probably_damaging(0.997)	26.3	3.89209
IL7	rs72666886		Emilsson	Wald ratio	1	-0.334	0.116	0.00415482	0.716	0.57	0.9	intron_variant,non_coding_transcript_variant	MODIFIER	-	lncRNA	-	-	1.455	0.018395
WISP1	rs2013158		Emilsson	Wald ratio	1	-0.103	0.037	0.00513394	0.902	0.84	0.97	upstream_gene_variant	MODIFIER	CCN4	protein_coding	-	-	1.713	0.05442
INPP5B	rs61778082		Emilsson	Wald ratio	1	0.173	0.062	0.00534792	1.189	1.053	1.343	intron_variant	MODIFIER	MTF1	protein_coding	-	-	8.857	0.743919
CTSS	rs41271951		Suhre	Wald ratio	1	-0.1231	0.0442	0.00539915	0.8842	0.8107	0.9643	missense_variant	MODERATE	CTSS	protein_coding	tolerated(0.27)	benign(0)	0.697	-0.136351
KIAA1161.8068.43.3	rs10972076		Sun	Wald ratio	1	0.219	0.079	0.00540429	1.245	1.067	1.453	regulatory_region_variant	MODIFIER	-	open_chromatin_region	-	-	1.344	0.001432
ADAMTS5	rs2830585		Emilsson	Wald ratio	1	0.082	0.03	0.00566868	1.086	1.024	1.151	missense_variant	MODERATE	ADAMTS5	protein_coding	deleterious(0.01)	probably_damaging(0.999)	28.4	4.16736
ADAMTS5	rs2830585		Suhre	Wald ratio	1	0.0828	0.0299	0.00566868	1.0863	1.0244	1.1519	missense_variant	MODERATE	ADAMTS5	protein_coding	deleterious(0.01)	probably_damaging(0.999)	28.4	4.16736
CD55.5069.9.3	rs11580387		Sun	Wald ratio	1	-0.145	0.053	0.00592642	0.865	0.781	0.959	intron_variant,non_coding_transcript_variant	MODIFIER	-	lncRNA	-	-	0.116	-0.505382
PLA2G7	rs71566584		Emilsson	Wald ratio	1	-0.576	0.21	0.00616946	0.562	0.372	0.849	intron_variant	MODIFIER	CYP39A1	protein_coding	-	-	2.214	0.113413
FCRL3.4440.15.2	rs7528684		Sun	Wald ratio	1	-0.122	0.045	0.00629674	0.885	0.811	0.966	upstream_gene_variant	MODIFIER	FCRL3	protein_coding	-	-	1.343	0.0012
KIAA1161	rs12377295	rs13290520	Emilsson	Wald ratio	1	-0.609	0.223	0.00632786	0.544	0.351	0.842
B3GNT2	rs11125907		Emilsson	Wald ratio	1	0.535	0.198	0.00680739	1.707	1.159	2.514	intron_variant	MODIFIER	COMMD1	protein_coding	-	-	0.246	-0.348466
ADAMTS5.3168.8.2	rs2830586		Sun	Wald ratio	1	0.148	0.055	0.00738142	1.159	1.04	1.292	intron_variant	MODIFIER	ADAMTS5	protein_coding	-	-	6.138	0.465339
GCA	rs34777723		Emilsson	Wald ratio	1	0.521	0.195	0.00758802	1.683	1.148	2.467	intron_variant	MODIFIER	KCNH7	protein_coding	-	-	3.915	0.267956
DKK1	rs1194614		Emilsson	Wald ratio	1	0.216	0.082	0.00836106	1.241	1.057	1.458	intergenic_variant	MODIFIER	-	-	-	-	1.703	0.053047
HRG	rs2228243		Suhre	Wald ratio	1	0.0778	0.0295	0.00837999	1.0809	1.0201	1.1452	missense_variant	MODERATE	HRG	protein_coding	tolerated(0.19)	benign(0.133)	0.273	-0.327364
C7	rs74480769		Emilsson	Wald ratio	1	-0.158	0.06	0.00841687	0.854	0.759	0.96	intron_variant	MODIFIER	C7	protein_coding	-	-	6.193	0.47049
HDGF	rs4399146		Emilsson	Wald ratio	1	-0.253	0.097	0.00881283	0.776	0.642	0.938	missense_variant	MODERATE	HDGF	protein_coding	deleterious_low_confidence(0.01)	benign(0)	22.7	2.6298
FETUB	rs3733159		Suhre	Wald ratio	1	0.2545	0.0974	0.00895153	1.2898	1.0657	1.561	intron_variant	MODIFIER	FETUB	protein_coding	-	-	0.017	-0.867058
CX3CL1	rs683544		Folkersen	Wald ratio	1	-0.318	0.122	0.0089707	0.728	0.574	0.924	intron_variant	MODIFIER	CX3CL1	protein_coding	-	-	0.432	-0.233851
IL7R	rs6451229		Emilsson	Wald ratio	1	0.272	0.104	0.00916246	1.313	1.07	1.611	intron_variant	MODIFIER	IL7R	protein_coding	-	-	0.839	-0.097552
MICA	rs9368624		Suhre	Wald ratio	1	0.2559	0.0984	0.00927769	1.2917	1.0652	1.5664	intron_variant	MODIFIER	TRIM15	protein_coding	-	-	0.232	-0.361278
NAAA.3173.49.2	rs9996608		Sun	Wald ratio	1	-0.121	0.046	0.00932238	0.886	0.809	0.971	intron_variant	MODIFIER	NAAA	protein_coding	-	-	4.349	0.305132
CTSF.9212.22.3	rs1791679		Sun	Wald ratio	1	0.284	0.109	0.00934354	1.329	1.072	1.647	upstream_gene_variant	MODIFIER	CTSF	protein_coding	-	-	2.742	0.165738
CTSF	rs607736		Emilsson	Wald ratio	1	0.369	0.142	0.00938624	1.447	1.095	1.912	intron_variant	MODIFIER	ACTN3	protein_coding	-	-	5.481	0.404905
IL18RAP	rs4851589		Emilsson	Wald ratio	1	-0.477	0.184	0.00945254	0.62	0.433	0.89	regulatory_region_variant	MODIFIER	-	CTCF_binding_site	-	-	4.66	0.332143
IL7R	rs11957503		Suhre	Wald ratio	1	0.1438	0.0555	0.00962598	1.1546	1.0355	1.2874	downstream_gene_variant	MODIFIER	IL7R	protein_coding	-	-	0.342	-0.28118
NAGPA	rs12599777		Emilsson	Wald ratio	1	-0.276	0.107	0.00982467	0.759	0.616	0.936	intron_variant	MODIFIER	NAGPA	protein_coding	-	-	0.877	-0.088318
NAGPA.11208.15.3	rs12599777		Sun	Wald ratio	1	-0.185	0.072	0.00982467	0.831	0.722	0.956	intron_variant	MODIFIER	NAGPA	protein_coding	-	-	0.877	-0.088318
IL15RA	rs7086174		Emilsson	Wald ratio	1	0.218	0.085	0.00985067	1.244	1.054	1.468	intron_variant	MODIFIER	IL15RA	protein_coding	-	-	5.409	0.398453
PDGFRB	rs3776081		Suhre	Wald ratio	1	0.0694	0.027	0.0100156	1.0719	1.0167	1.13	intron_variant	MODIFIER	PDGFRB	protein_coding	-	-	7.545	0.603304
IL18RAP	rs6543140		Suhre	Wald ratio	1	-0.1326	0.052	0.0107233	0.8758	0.791	0.9697	intergenic_variant	MODIFIER	-	-	-	-	0.787	-0.111004
IL15RA	rs7097780		Suhre	Wald ratio	1	0.1865	0.0732	0.0108908	1.205	1.0439	1.391	intron_variant	MODIFIER	IL15RA	protein_coding	-	-	4.075	0.281684
QSOX1	rs3767199		Emilsson	Wald ratio	1	0.301	0.121	0.0124193	1.352	1.067	1.712	intron_variant	MODIFIER	QSOX1	protein_coding	-	-	7.094	0.557554
SULT2A1	rs296369		Emilsson	Wald ratio	1	0.227	0.091	0.0128534	1.254	1.049	1.5	downstream_gene_variant	MODIFIER	SULT2A1	protein_coding	-	-	0.632	-0.156645
IL-8	rs7655660		Folkersen	Wald ratio	1	0.681	0.274	0.0128993	1.975	1.155	3.377	regulatory_region_variant	MODIFIER	-	promoter_flanking_region	-	-	0.37	-0.265259
RIC3	rs12793446		Emilsson	Wald ratio	1	-0.718	0.289	0.0131325	0.488	0.277	0.86	intergenic_variant	MODIFIER	-	-	-	-	8.687	0.725415
LMAN2L.8013.9.3	rs2271893		Sun	Wald ratio	1	0.235	0.095	0.013587	1.265	1.05	1.524	intron_variant	MODIFIER	LMAN2L	protein_coding	-	-	10.32	0.889162
LMAN2L	rs2271893		Emilsson	Wald ratio	1	0.341	0.138	0.013587	1.406	1.073	1.843	intron_variant	MODIFIER	LMAN2L	protein_coding	-	-	10.32	0.889162
BPIFB1.11246.3.3	rs2424961		Sun	Wald ratio	1	0.139	0.057	0.0147069	1.149	1.028	1.284	intron_variant	MODIFIER	BPIFB4	protein_coding	-	-	0.044	-0.69652
TAX1BP3	rs3826503		Emilsson	Wald ratio	1	0.529	0.217	0.0147489	1.698	1.109	2.599	intron_variant	MODIFIER	TRPV1	protein_coding	-	-	0.131	-0.47986
GDI2	rs2890364		Emilsson	Wald ratio	1	-0.306	0.126	0.0150506	0.736	0.575	0.942	intron_variant	MODIFIER	GDI2	protein_coding	-	-	0.349	-0.276781
IFI16.12893.159.3	rs72709516		Sun	Wald ratio	1	0.159	0.066	0.0155037	1.172	1.031	1.333	intron_variant	MODIFIER	IFI16	protein_coding	-	-	1.387	0.008169
COPS7B	rs13398149		Emilsson	Wald ratio	1	-0.55	0.227	0.0155563	0.577	0.37	0.901	intergenic_variant	MODIFIER	-	-	-	-	11.79	1.01343
ERLEC1	rs766075		Emilsson	Wald ratio	1	-0.446	0.185	0.0158168	0.64	0.446	0.92	intron_variant	MODIFIER	ASB3	protein_coding	-	-	0.253	-0.343321
ST8SIA6	rs35512633		Emilsson	Wald ratio	1	-0.407	0.169	0.0160086	0.665	0.478	0.927	intron_variant	MODIFIER	ST8SIA6	protein_coding	-	-	1.183	-0.025554
B3GALT6	rs3766186		Emilsson	Wald ratio	1	0.398	0.165	0.016019	1.489	1.077	2.059	intron_variant	MODIFIER	SDF4	protein_coding	-	-	2.625	0.154677
TNFRSF6B	rs1056441		Emilsson	Wald ratio	1	-0.435	0.181	0.0160471	0.647	0.454	0.922	3_prime_UTR_variant	MODIFIER	LIME1	protein_coding	-	-	8.471	0.701734
LTF.2795.23.3	rs61740470		Sun	Wald ratio	1	-0.239	0.099	0.0160676	0.788	0.649	0.957	splice_region_variant,synonymous_variant	LOW	LTF	protein_coding	-	-	22	2.37615
FLRT1	rs138056821		Emilsson	Wald ratio	1	0.868	0.361	0.0162119	2.382	1.174	4.833	intron_variant	MODIFIER	MACROD1	protein_coding	-	-	0.174	-0.421273
CBLN1.9313.27.3	rs10852587		Sun	Wald ratio	1	-0.07	0.029	0.0167075	0.932	0.88	0.987	intergenic_variant	MODIFIER	-	-	-	-	4.578	0.324943
TIMP4	rs394945		Emilsson	Wald ratio	1	-0.196	0.082	0.0168336	0.822	0.701	0.965	intron_variant	MODIFIER	SYN2	protein_coding	-	-	0.569	-0.178259
CPZ.6493.9.3	rs2631738		Sun	Wald ratio	1	-0.289	0.121	0.0168561	0.749	0.591	0.949	downstream_gene_variant	MODIFIER	TRMT44	protein_coding	-	-	3.231	0.209385
ERLEC1.8957.72.3	rs58359565		Sun	Wald ratio	1	-0.321	0.134	0.016982	0.726	0.558	0.944	intron_variant	MODIFIER	ASB3	protein_coding	-	-	1.032	-0.054278
TIMP4.6462.12.3	rs454615		Sun	Wald ratio	1	-0.15	0.063	0.0174343	0.86	0.76	0.974	intron_variant	MODIFIER	SYN2	protein_coding	-	-	12.63	1.0857
FCRL3	rs7522061		Emilsson	Wald ratio	1	-0.081	0.034	0.0177019	0.922	0.862	0.986	missense_variant	MODERATE	FCRL3	protein_coding	tolerated(0.07)	benign(0.015)	2.106	0.101627
FCRL3	rs7522061		Suhre	Wald ratio	1	-0.0821	0.0346	0.0177019	0.9212	0.8608	0.9858	missense_variant	MODERATE	FCRL3	protein_coding	tolerated(0.07)	benign(0.015)	2.106	0.101627
TNFRSF11A.8256.57.3	rs884205		Sun	Wald ratio	1	-0.292	0.123	0.018161	0.747	0.586	0.952	3_prime_UTR_variant	MODIFIER	TNFRSF11A	protein_coding	-	-	1.821	0.068142
WISP1.13692.154.3	rs35472615		Sun	Wald ratio	1	-0.124	0.052	0.0183634	0.884	0.797	0.979	regulatory_region_variant	MODIFIER	-	promoter_flanking_region	-	-	0.581	-0.173919
HAVCR1	rs6878069		Emilsson	Wald ratio	1	0.139	0.059	0.0184011	1.149	1.024	1.29	intron_variant	MODIFIER	HAVCR1	protein_coding	-	-	0.29	-0.31476
DKK3	rs113672631		Emilsson	Wald ratio	1	0.46	0.196	0.0189422	1.584	1.079	2.327	upstream_gene_variant	MODIFIER	USP47	protein_coding	-	-	8.94	0.753028
SHMT2	rs7485577		Emilsson	Wald ratio	1	0.57	0.245	0.0200972	1.769	1.094	2.861	intron_variant	MODIFIER	NXPH4	protein_coding	-	-	0.105	-0.525277
AZU1	rs351976		Emilsson	Wald ratio	1	-0.327	0.141	0.0206264	0.721	0.547	0.951	intron_variant	MODIFIER	PTBP1	protein_coding	-	-	0.079	-0.583699
SEMA3G	rs1011063		Emilsson	Wald ratio	1	-0.27	0.117	0.0211781	0.763	0.606	0.96	intron_variant	MODIFIER	NISCH	protein_coding	-	-	2.507	0.143346
KNG1	rs5030044		Emilsson	Wald ratio	1	-0.057	0.025	0.0215978	0.945	0.9	0.992	intron_variant	MODIFIER	KNG1	protein_coding	-	-	10.47	0.90338
MENT	rs12759273		Emilsson	Wald ratio	1	0.411	0.179	0.0218768	1.509	1.061	2.144
GP5	rs1466733		Yao	Wald ratio	1	0.37	0.161	0.0220297	1.447	1.055	1.986	upstream_gene_variant	MODIFIER	GP5	protein_coding	-	-	8.735	0.730594
FCRL4	rs11591129		Emilsson	Wald ratio	1	-0.07	0.03	0.0220898	0.933	0.879	0.99	intron_variant	MODIFIER	FCRL4	protein_coding	-	-	3.05	0.193537
SEMA3G.5628.21.3	rs2016575		Sun	Wald ratio	1	-0.259	0.113	0.0222435	0.772	0.619	0.964	intron_variant	MODIFIER	SEMA3G	protein_coding	-	-	0.998	-0.061137
KIM-1	rs6555820		Folkersen	Wald ratio	1	0.112	0.049	0.0223066	1.118	1.016	1.231	intron_variant	MODIFIER	HAVCR1	protein_coding	-	-	0.506	-0.201743
SELE	rs4265482		Emilsson	Wald ratio	1	-0.437	0.192	0.0225472	0.646	0.444	0.94	downstream_gene_variant	MODIFIER	-	lncRNA	-	-	4.634	0.329894
AHSG	rs2518136		Suhre	Wald ratio	1	0.0971	0.0426	0.0226979	1.102	1.0137	1.198	intron_variant	MODIFIER	AHSG	protein_coding	-	-	4.187	0.291204
ARHGAP25	rs13426364		Emilsson	Wald ratio	1	-0.485	0.214	0.0236514	0.616	0.405	0.937	intron_variant	MODIFIER	ARHGAP25	protein_coding	-	-	2.688	0.160625
CHST1	rs4755334		Emilsson	Wald ratio	1	-0.39	0.173	0.0241511	0.677	0.483	0.95	intergenic_variant	MODIFIER	-	-	-	-	0.682	-0.14076
KIAA2013	rs11588551		Emilsson	Wald ratio	1	-0.296	0.131	0.0243136	0.744	0.575	0.962	downstream_gene_variant	MODIFIER	SBF1P2	processed_pseudogene	-	-	0.778	-0.113438
AKR1A1	rs6662572		Suhre	Wald ratio	1	-0.1893	0.0844	0.0248558	0.8276	0.7015	0.9764	intron_variant	MODIFIER	GPBP1L1	protein_coding	-	-	2.974	0.186729
TXNDC5.11212.7.3	rs111331197		Sun	Wald ratio	1	0.196	0.088	0.0251391	1.216	1.025	1.444	missense_variant	MODERATE	TXNDC5	protein_coding	deleterious(0)	probably_damaging(0.997)	26.8	3.97423
KNG1	rs2304456		Suhre	Wald ratio	1	-0.0622	0.0278	0.0252967	0.9397	0.8898	0.9923	missense_variant	MODERATE	KNG1	protein_coding	deleterious(0.03)	possibly_damaging(0.644)	6.697	0.518583
ADAMTS13	rs3118663		Suhre	Wald ratio	1	-0.139	0.0623	0.0256343	0.8702	0.7702	0.9832	intron_variant	MODIFIER	REXO4	protein_coding	-	-	5.605	0.416132
WFDC5	rs35017113		Emilsson	Wald ratio	1	0.303	0.136	0.0263405	1.353	1.036	1.768	intron_variant	MODIFIER	STK4	protein_coding	-	-	1.653	0.046458
ERAP2.8960.3.3	rs2927608		Sun	Wald ratio	1	0.05	0.022	0.0263958	1.051	1.006	1.098	intron_variant	MODIFIER	ERAP2	protein_coding	-	-	0.37	-0.265257
MGAT4B.7141.21.3	rs73351608		Sun	Wald ratio	1	0.195	0.088	0.02706	1.215	1.022	1.444	intron_variant	MODIFIER	MGAT4B	protein_coding	-	-	1.402	0.010405
COL6A1	rs2150458		Emilsson	Wald ratio	1	0.176	0.08	0.0274526	1.192	1.02	1.393	intergenic_variant	MODIFIER	-	-	-	-	1.342	0.001125
DEF6	rs3800401		Emilsson	Wald ratio	1	0.457	0.21	0.0292575	1.58	1.047	2.383	intergenic_variant	MODIFIER	-	-	-	-	0.062	-0.632475
RRM2B.8925.25.3	rs74589258		Sun	Wald ratio	1	-0.313	0.144	0.0294261	0.732	0.552	0.969	downstream_gene_variant	MODIFIER	RRM2B	protein_coding	-	-	2.212	0.113209
CPNE1.5346.24.3	rs12481228		Sun	Wald ratio	1	-0.086	0.039	0.0294744	0.918	0.85	0.992	missense_variant	MODERATE	CPNE1	protein_coding	deleterious(0.01)	benign(0.179)	27.8	4.1057
COMP	rs12983566		Emilsson	Wald ratio	1	-0.531	0.246	0.0311757	0.588	0.363	0.953	upstream_gene_variant	MODIFIER	KLHL26	protein_coding	-	-	2.728	0.164369
TNFRSF11A	rs6567282		Emilsson	Wald ratio	1	-0.313	0.146	0.0313766	0.731	0.55	0.972	intergenic_variant	MODIFIER	-	-	-	-	1.39	0.008642
RSPO2	rs689275		Emilsson	Wald ratio	1	0.408	0.19	0.0314053	1.504	1.037	2.181	intron_variant	MODIFIER	EIF3E	protein_coding	-	-	7.103	0.558462
GLO1	rs12209477		Emilsson	Wald ratio	1	-0.308	0.143	0.0316045	0.735	0.555	0.973	intron_variant	MODIFIER	GLO1	protein_coding	-	-	3.712	0.250677
ARMC5	rs143771583		Emilsson	Wald ratio	1	0.449	0.209	0.0318607	1.567	1.04	2.361	intron_variant	MODIFIER	ZNF843	protein_coding	-	-	1.034	-0.053845
CACNA2D3	rs1868513		Emilsson	Wald ratio	1	0.367	0.171	0.0319346	1.443	1.032	2.017	intron_variant	MODIFIER	CACNA2D3	protein_coding	-	-	0.682	-0.14077
PLG.3710.49.2	rs189821701		Sun	Wald ratio	1	0.216	0.101	0.032021	1.241	1.019	1.511
NRCAM	rs1034825		Emilsson	Wald ratio	1	0.457	0.214	0.0323204	1.58	1.039	2.401	intron_variant	MODIFIER	NRCAM	protein_coding	-	-	3.162	0.203336
CTSC	rs55897509		Emilsson	Wald ratio	1	0.089	0.042	0.032602	1.093	1.007	1.187	intron_variant	MODIFIER	CTSC	protein_coding	-	-	8.48	0.702703
ICAM5	rs281439		Emilsson	Wald ratio	1	0.099	0.046	0.033348	1.104	1.008	1.209	upstream_gene_variant	MODIFIER	ICAM5	protein_coding	-	-	9.141	0.774375
ICAM5.5124.62.3	rs281439		Sun	Wald ratio	1	0.09	0.042	0.033348	1.095	1.007	1.189	upstream_gene_variant	MODIFIER	ICAM5	protein_coding	-	-	9.141	0.774375
ICAM5.8245.27.3	rs281439		Sun	Wald ratio	1	0.073	0.034	0.033348	1.075	1.006	1.15	upstream_gene_variant	MODIFIER	ICAM5	protein_coding	-	-	9.141	0.774375
IL1RN.5353.89.2	rs6761276		Sun	Wald ratio	1	-0.265	0.125	0.0334991	0.767	0.601	0.979	missense_variant	MODERATE	IL1F10	protein_coding	deleterious(0.03)	benign(0.005)	22.2	2.42726
MFGE8.4455.89.2	rs1961839		Sun	Wald ratio	1	-0.229	0.108	0.0337156	0.795	0.644	0.983	intergenic_variant	MODIFIER	-	-	-	-	3.198	0.206473
TDGF1	rs3806701		Suhre	Wald ratio	1	0.0524	0.0249	0.0349367	1.0538	1.0037	1.1065	upstream_gene_variant	MODIFIER	TDGF1	protein_coding	-	-	3.752	0.254081
XCL1.14078.69.3	rs4656599		Sun	Wald ratio	1	-0.146	0.069	0.0353456	0.865	0.755	0.99	intergenic_variant	MODIFIER	-	-	-	-	0.129	-0.482562
TDGF1.5810.25.3	rs6769392		Sun	Wald ratio	1	0.044	0.021	0.0353508	1.045	1.003	1.089	upstream_gene_variant	MODIFIER	-	nonsense_mediated_decay	-	-	1.972	0.086421
LEP	rs12537573		Folkersen	Wald ratio	1	-0.707	0.337	0.0359355	0.493	0.255	0.955	downstream_gene_variant	MODIFIER	LEP	protein_coding	-	-	2.332	0.125843
CPZ	rs2688220		Emilsson	Wald ratio	1	-0.351	0.167	0.0359531	0.704	0.507	0.977	intron_variant,non_coding_transcript_variant	MODIFIER	-	lncRNA	-	-	3.394	0.223453
WFDC1	rs400345		Emilsson	Wald ratio	1	0.145	0.069	0.0360411	1.156	1.009	1.323	5_prime_UTR_variant	MODIFIER	WFDC1	protein_coding	-	-	7.472	0.595853
TMEM132D	rs61943549		Emilsson	Wald ratio	1	0.238	0.114	0.0367431	1.268	1.015	1.585	intron_variant	MODIFIER	TMEM132D	protein_coding	-	-	1.459	0.019006
TDGF1	rs4682823		Emilsson	Wald ratio	1	0.043	0.021	0.0368635	1.044	1.003	1.087	intron_variant,NMD_transcript_variant	MODIFIER	-	nonsense_mediated_decay	-	-	1.18	-0.026201
PGM1.9173.21.3	rs1126728		Sun	Wald ratio	1	-0.208	0.1	0.0371944	0.812	0.667	0.988	missense_variant	MODERATE	PGM1	protein_coding	tolerated(0.25)	benign(0.208)	23	2.76437
CNTN1	rs11177623		Emilsson	Wald ratio	1	-0.288	0.139	0.0377214	0.75	0.571	0.984	intergenic_variant	MODIFIER	-	-	-	-	0.424	-0.237364
RRM2B	rs28928597		Emilsson	Wald ratio	1	-0.155	0.075	0.0393406	0.856	0.739	0.992	intron_variant	MODIFIER	RRM2B	protein_coding	-	-	5.16	0.37613
ROR1.2590.69.4	rs1408416		Sun	Wald ratio	1	-0.148	0.072	0.0394046	0.862	0.749	0.993	intron_variant	MODIFIER	ROR1	protein_coding	-	-	0.354	-0.274197
PPT1.9244.27.3	rs7533094		Sun	Wald ratio	1	-0.14	0.068	0.0394051	0.87	0.762	0.993	intron_variant	MODIFIER	PPT1	protein_coding	-	-	0.761	-0.117942
VEGFC	rs112782083		Emilsson	Wald ratio	1	0.122	0.06	0.0401296	1.13	1.006	1.27	intergenic_variant	MODIFIER	-	-	-	-	10.27	0.884317
PIANP	rs60889510		Emilsson	Wald ratio	1	0.462	0.226	0.0407759	1.587	1.02	2.471	downstream_gene_variant	MODIFIER	MLF2	protein_coding	-	-	2.944	0.184096
CST5	rs2071444		Emilsson	Wald ratio	1	-0.077	0.038	0.040839	0.926	0.86	0.997	intron_variant	MODIFIER	CST5	protein_coding	-	-	3.441	0.227467
PAM.5620.13.3	rs257309		Sun	Wald ratio	1	0.108	0.053	0.0409008	1.114	1.004	1.236	downstream_gene_variant	MODIFIER	GIN1	protein_coding	-	-	2.566	0.149121
CCL28	rs77957201		Emilsson	Wald ratio	1	-0.386	0.19	0.0417791	0.679	0.468	0.986	intron_variant	MODIFIER	NIM1K	protein_coding	-	-	0.943	-0.073023
CD5L	rs2765496		Emilsson	Wald ratio	1	0.28	0.138	0.0429198	1.323	1.009	1.736	downstream_gene_variant	MODIFIER	CD5L	protein_coding	-	-	1.336	3e-05
ABO.9253.52.3	rs505922		Sun	Wald ratio	1	-0.039	0.019	0.0429898	0.961	0.926	0.999	intron_variant	MODIFIER	ABO	protein_coding	-	-	1.96	0.084959
PI3	rs6032067		Suhre	Wald ratio	1	0.1514	0.0749	0.0433971	1.1634	1.0045	1.3475	downstream_gene_variant	MODIFIER	-	transcribed_unprocessed_pseudoge	-	-	2.791	0.170258
CNTN2	rs4951168		Suhre	Wald ratio	1	0.0882	0.0437	0.0436441	1.0922	1.0025	1.1898	missense_variant	MODERATE	TMEM81	protein_coding	tolerated(0.11)	benign(0.04)	17.33	1.74365
COL18A1.2201.17.6	rs144147445		Sun	Wald ratio	1	-0.144	0.072	0.0440336	0.866	0.752	0.996
ERAP2	rs38033		Emilsson	Wald ratio	1	0.042	0.021	0.044145	1.043	1.001	1.087	intron_variant	MODIFIER	LNPEP	protein_coding	-	-	6.796	0.528208
MLN	rs2395400		Emilsson	Wald ratio	1	0.112	0.056	0.0451174	1.119	1.002	1.249	intron_variant	MODIFIER	MLN	protein_coding	-	-	6.856	0.534057
CPNE1	rs6060578		Emilsson	Wald ratio	1	-0.074	0.037	0.0455003	0.929	0.864	0.999	intron_variant	MODIFIER	RBM39	protein_coding	-	-	0.188	-0.404292
DLL1	rs6456202		Emilsson	Wald ratio	1	-0.448	0.224	0.0455003	0.639	0.412	0.991	intron_variant	MODIFIER	FAM120B	protein_coding	-	-	0.935	-0.074969
MGAT4B	rs58413676		Emilsson	Wald ratio	1	0.101	0.051	0.0457583	1.106	1.002	1.221	intron_variant	MODIFIER	MGAT4B	protein_coding	-	-	5.588	0.41456
CCL25	rs77625270		Emilsson	Wald ratio	1	0.086	0.043	0.0461268	1.089	1.001	1.185	intron_variant	MODIFIER	CCL25	protein_coding	-	-	1.493	0.023975
NQO1	rs11648249		Emilsson	Wald ratio	1	-0.193	0.097	0.0463341	0.825	0.682	0.997	intron_variant	MODIFIER	NFAT5	protein_coding	-	-	0.802	-0.106983
UST	rs11155591		Emilsson	Wald ratio	1	-0.348	0.175	0.0471807	0.706	0.501	0.996	upstream_gene_variant	MODIFIER	UST	protein_coding	-	-	4.203	0.292639
PI3	rs6104052		Emilsson	Wald ratio	1	0.187	0.095	0.048161	1.206	1.002	1.452	downstream_gene_variant	MODIFIER	PI3	protein_coding	-	-	0.587	-0.171962
CST5	rs6138152		Suhre	Wald ratio	1	-0.0838	0.0426	0.0491463	0.9196	0.8459	0.9997	regulatory_region_variant	MODIFIER	-	promoter_flanking_region	-	-	4.528	0.320614
ICOSLG	rs11558819		Emilsson	Wald ratio	1	0.069	0.035	0.0495118	1.072	1	1.149	missense_variant	MODERATE	ICOSLG	protein_coding	deleterious(0.03)	benign(0.125)	3.199	0.206626
ICOSLG.9303.9.3	rs11558819		Sun	Wald ratio	1	0.095	0.048	0.0495118	1.1	1	1.209	missense_variant	MODERATE	ICOSLG	protein_coding	deleterious(0.03)	benign(0.125)	3.199	0.206626
TYMP	rs131798		Emilsson	Wald ratio	1	-0.29	0.149	0.0507254	0.748	0.559	1.001	upstream_gene_variant	MODIFIER	TYMP	protein_coding	-	-	1.495	0.024265
ABO	rs492488		Emilsson	Wald ratio	1	-0.034	0.017	0.0509155	0.967	0.935	1	intron_variant	MODIFIER	ABO	protein_coding	-	-	1.76	0.060388
CPNE1	rs2425143		Suhre	Wald ratio	1	-0.0614	0.0315	0.0511761	0.9404	0.8841	1.0003	regulatory_region_variant	MODIFIER	-	enhancer	-	-	5.619	0.417449
CCL3L1	rs16971895		Suhre	Wald ratio	1	0.1629	0.0838	0.0518213	1.1769	0.9987	1.3869	regulatory_region_variant	MODIFIER	-	promoter_flanking_region	-	-	1.018	-0.057156
APOH	rs1801690		Emilsson	Wald ratio	1	-0.175	0.09	0.052409	0.839	0.703	1.002	missense_variant	MODERATE	APOH	protein_coding	deleterious(0.01)	probably_damaging(0.983)	28.1	4.13955
CD40	rs4810485		Folkersen	Wald ratio	1	0.105	0.054	0.0526843	1.111	0.999	1.236	intron_variant	MODIFIER	CD40	protein_coding	-	-	0.942	-0.073228
WARS	rs941923		Emilsson	Wald ratio	1	0.204	0.105	0.0532257	1.226	0.997	1.508	splice_region_variant,intron_variant	LOW	WARS1	protein_coding	-	-	1.626	0.042727
CD5L	rs2765501		Yao	Wald ratio	1	0.165	0.086	0.0540757	1.179	0.997	1.395	intron_variant	MODIFIER	CD5L	protein_coding	-	-	0.086	-0.5652
SERPINA3	rs61976132		Emilsson	Wald ratio	1	-0.265	0.138	0.0541285	0.767	0.585	1.005	intron_variant,non_coding_transcript_variant	MODIFIER	SERPINA13P	transcribed_unprocessed_pseudoge	-	-	1.046	-0.051334
DPP4	rs10166124		Yao	Wald ratio	1	0.474	0.247	0.054699	1.606	0.99	2.604	intron_variant	MODIFIER	DPP4	protein_coding	-	-	0.041	-0.712827
MESDC2	rs1012541		Emilsson	Wald ratio	1	0.349	0.182	0.0547426	1.418	0.993	2.025	downstream_gene_variant	MODIFIER	CEMIP	protein_coding	-	-	0.643	-0.153032
FCRL4.8973.23.3	rs11582663		Sun	Wald ratio	1	-0.056	0.029	0.0558266	0.946	0.893	1.001	missense_variant	MODERATE	FCRL4	protein_coding	tolerated(0.59)	benign(0.046)	0.024	-0.811615
RCN1	rs477838		Emilsson	Wald ratio	1	0.382	0.2	0.0560235	1.465	0.99	2.169	intron_variant	MODIFIER	-	protein_coding	-	-	3.719	0.25125
DKK2	rs77571736		Emilsson	Wald ratio	1	-0.115	0.061	0.0567028	0.891	0.791	1.003	intron_variant	MODIFIER	DKK2	protein_coding	-	-	5.658	0.420936
AMICA1	rs4938490		Emilsson	Wald ratio	1	-0.052	0.027	0.0570466	0.95	0.9	1.002	intron_variant	MODIFIER	JAML	protein_coding	-	-	0.721	-0.129408
ISG15	rs3121567		Emilsson	Wald ratio	1	0.182	0.096	0.0571726	1.2	0.994	1.447	downstream_gene_variant	MODIFIER	-	lncRNA	-	-	3.279	0.213568
PMEL	rs3213122		Emilsson	Wald ratio	1	0.276	0.145	0.057463	1.318	0.991	1.753	intron_variant	MODIFIER	CDK2	protein_coding	-	-	6.606	0.509711
CEL.9796.4.3	rs8193016		Sun	Wald ratio	1	0.183	0.097	0.0585925	1.2	0.993	1.451	intron_variant	MODIFIER	GTF3C5	protein_coding	-	-	3.587	0.240014
CCL8	rs4795912		Emilsson	Wald ratio	1	0.048	0.025	0.059246	1.049	0.998	1.102	regulatory_region_variant	MODIFIER	-	promoter_flanking_region	-	-	1.101	-0.040704
AMICA1.8232.90.3	rs17121881		Sun	Wald ratio	1	-0.045	0.024	0.0592847	0.956	0.913	1.002	missense_variant	MODERATE	JAML	protein_coding	deleterious(0)	benign(0.322)	16.56	1.62916
IMPAD1	rs112433249		Emilsson	Wald ratio	1	-0.112	0.06	0.0600811	0.894	0.795	1.005
IMPAD1.9231.23.3	rs112433249		Sun	Wald ratio	1	-0.121	0.065	0.0600811	0.886	0.78	1.005
NTN1	rs72809988		Emilsson	Wald ratio	1	0.149	0.079	0.0605626	1.161	0.993	1.356	intron_variant	MODIFIER	NTN1	protein_coding	-	-	2.439	0.136633
NTN1.6649.51.3	rs72809988		Sun	Wald ratio	1	0.121	0.064	0.0605626	1.129	0.995	1.28	intron_variant	MODIFIER	NTN1	protein_coding	-	-	2.439	0.136633
PCDH9	rs1927820		Emilsson	Wald ratio	1	0.242	0.129	0.0615969	1.273	0.988	1.641	intron_variant	MODIFIER	PCDH9	protein_coding	-	-	0.704	-0.13419
CCL16	rs33995560		Suhre	Wald ratio	1	0.0597	0.032	0.0621154	1.0615	0.997	1.1303	3_prime_UTR_variant	MODIFIER	CCL16	protein_coding	-	-	7.037	0.551862
VAV1	rs56100731		Emilsson	Wald ratio	1	-0.308	0.165	0.0624154	0.735	0.532	1.016	3_prime_UTR_variant	MODIFIER	VAV1	protein_coding	-	-	0.069	-0.611916
NADK	rs4648729	rs35386522	Emilsson	Wald ratio	1	-0.299	0.16	0.0624274	0.742	0.542	1.016
BCAM.2816.50.2	rs144579705		Sun	Wald ratio	1	0.265	0.143	0.0629911	1.304	0.986	1.724
ENG	rs4837181		Emilsson	Wald ratio	1	-0.297	0.16	0.0634576	0.743	0.543	1.017	intron_variant	MODIFIER	SH2D3C	protein_coding	-	-	0.299	-0.308753
FASN	rs11653003		Emilsson	Wald ratio	1	-0.368	0.198	0.0638908	0.692	0.469	1.021	upstream_gene_variant	MODIFIER	FASN	protein_coding	-	-	0.779	-0.113089
GAA	rs12450199		Emilsson	Wald ratio	1	-0.121	0.066	0.0641351	0.886	0.779	1.007	intron_variant	MODIFIER	GAA	protein_coding	-	-	8.196	0.672
LILRB5	rs10405357		Emilsson	Wald ratio	1	-0.051	0.028	0.0646275	0.95	0.9	1.003	intron_variant	MODIFIER	LILRB5	protein_coding	-	-	0.189	-0.403684
CD177.13116.25.3	rs73554000		Sun	Wald ratio	1	0.089	0.048	0.0647543	1.093	0.995	1.201	intergenic_variant	MODIFIER	-	-	-	-	13.65	1.20145
HAVCR1.9021.1.3	rs6889164		Sun	Wald ratio	1	0.113	0.062	0.0658131	1.12	0.993	1.263	intron_variant	MODIFIER	HAVCR1	protein_coding	-	-	1.197	-0.023145
MMP8	rs2846714		Emilsson	Wald ratio	1	-0.224	0.122	0.0659579	0.799	0.63	1.015	intergenic_variant	MODIFIER	-	-	-	-	0.848	-0.095405
CROT	rs77463367		Emilsson	Wald ratio	1	-0.234	0.127	0.0661403	0.791	0.617	1.016	intron_variant	MODIFIER	CROT	protein_coding	-	-	0.414	-0.242419
TEK	rs35030851		Suhre	Wald ratio	1	-0.1104	0.0603	0.0670649	0.8955	0.7957	1.0078	missense_variant	MODERATE	TEK	protein_coding	tolerated(0.53)	benign(0.005)	17.84	1.81483
TIE2	rs35030851		Folkersen	Wald ratio	1	-0.124	0.068	0.0670649	0.883	0.773	1.009	missense_variant	MODERATE	TEK	protein_coding	tolerated(0.53)	benign(0.005)	17.84	1.81483
TEK.3773.15.4	rs35030851		Sun	Wald ratio	1	-0.183	0.1	0.0670649	0.833	0.685	1.013	missense_variant	MODERATE	TEK	protein_coding	tolerated(0.53)	benign(0.005)	17.84	1.81483
COL15A1	rs7861925		Emilsson	Wald ratio	1	0.22	0.12	0.0671812	1.247	0.985	1.578	intron_variant	MODIFIER	COL15A1	protein_coding	-	-	3.852	0.262645
AKR1A1	rs72688441		Emilsson	Wald ratio	1	-0.074	0.04	0.0686051	0.929	0.858	1.006	intron_variant	MODIFIER	NASP	protein_coding	-	-	3.028	0.191612
AKR1A1.4192.10.2	rs72688441		Sun	Wald ratio	1	-0.079	0.044	0.0686051	0.924	0.848	1.006	intron_variant	MODIFIER	NASP	protein_coding	-	-	3.028	0.191612
CLEC3B	rs10865936		Emilsson	Wald ratio	1	0.204	0.112	0.0696723	1.226	0.984	1.527	intron_variant	MODIFIER	EXOSC7	protein_coding	-	-	10.08	0.866588
C3orf18	rs78431498		Emilsson	Wald ratio	1	0.401	0.222	0.0701346	1.494	0.968	2.307	intron_variant	MODIFIER	CACNA2D2	protein_coding	-	-	1.175	-0.02711
FGFBP3	rs11186737		Emilsson	Wald ratio	1	0.153	0.084	0.0706309	1.165	0.987	1.375	3_prime_UTR_variant	MODIFIER	FGFBP3	protein_coding	-	-	0.462	-0.220358
FCRL1	rs6427401		Emilsson	Wald ratio	1	-0.149	0.083	0.0713225	0.861	0.733	1.013	upstream_gene_variant	MODIFIER	FCRL2	protein_coding	-	-	1.347	0.001883
EMILIN3.8773.172.3	rs61739314		Sun	Wald ratio	1	0.166	0.092	0.0720107	1.18	0.985	1.414	missense_variant	MODERATE	EMILIN3	protein_coding	tolerated(0.11)	possibly_damaging(0.696)	24.1	3.28804
EMILIN3	rs61739314		Emilsson	Wald ratio	1	0.133	0.074	0.0720107	1.142	0.988	1.32	missense_variant	MODERATE	EMILIN3	protein_coding	tolerated(0.11)	possibly_damaging(0.696)	24.1	3.28804
ALPPL2	rs10933394		Emilsson	Wald ratio	1	0.243	0.135	0.0730837	1.275	0.978	1.662	downstream_gene_variant	MODIFIER	ALPP	protein_coding	-	-	0.972	-0.066859
RNASE4.5644.60.3	rs12588573		Sun	Wald ratio	1	-0.116	0.065	0.0733932	0.891	0.784	1.011	upstream_gene_variant	MODIFIER	Y_RNA	misc_RNA	-	-	3.154	0.202657
IGFBP7	rs1718860		Emilsson	Wald ratio	1	0.167	0.093	0.0734118	1.181	0.984	1.417	intron_variant	MODIFIER	IGFBP7	protein_coding	-	-	1.253	-0.013435
HIBCH	rs291447		Emilsson	Wald ratio	1	-0.067	0.037	0.0737541	0.935	0.869	1.006	intron_variant	MODIFIER	HIBCH	protein_coding	-	-	0.77	-0.115553
FUT3	rs28362459		Suhre	Wald ratio	1	0.1172	0.0655	0.0738066	1.1243	0.9888	1.2784	missense_variant	MODERATE	FUT3	protein_coding	deleterious(0)	probably_damaging(1)	20.4	2.13976
CLEC12A.11187.11.3	rs2961544		Sun	Wald ratio	1	0.034	0.019	0.0742412	1.035	0.997	1.075	intron_variant	MODIFIER	CLEC12A	protein_coding	-	-	2.002	0.089823
GNPNAT1	rs12589690		Emilsson	Wald ratio	1	0.264	0.148	0.0745321	1.302	0.974	1.741	intron_variant,non_coding_transcript_variant	MODIFIER	-	lncRNA	-	-	0.338	-0.283423
ROR1	rs6671162		Emilsson	Wald ratio	1	-0.219	0.123	0.074621	0.804	0.632	1.022	intron_variant	MODIFIER	ROR1	protein_coding	-	-	0.837	-0.098127
DNAJC10	rs288336		Emilsson	Wald ratio	1	0.32	0.181	0.0766452	1.377	0.966	1.963	intron_variant	MODIFIER	DNAJC10	protein_coding	-	-	4.896	0.352764
C4BPA	rs11120218		Emilsson	Wald ratio	1	0.147	0.083	0.0780854	1.158	0.984	1.363	intron_variant	MODIFIER	C4BPA	protein_coding	-	-	0.117	-0.503548
C8A C8B C8G	rs1013579		Suhre	Wald ratio	1	0.1644	0.0933	0.0782158	1.1786	0.9816	1.4152	stop_gained	HIGH	C8B	protein_coding	-	-	36	6.83022
KLK1	rs111477094		Emilsson	Wald ratio	1	0.464	0.264	0.0786004	1.591	0.948	2.668	upstream_gene_variant	MODIFIER	KLK2	protein_coding	-	-	6.802	0.528782
CCL7	rs8068122		Emilsson	Wald ratio	1	0.052	0.03	0.0788857	1.054	0.994	1.117	downstream_gene_variant	MODIFIER	-	processed_pseudogene	-	-	1.397	0.009731
NID2	rs2749870		Emilsson	Wald ratio	1	-0.062	0.035	0.0801183	0.94	0.878	1.007	intron_variant	MODIFIER	NID2	protein_coding	-	-	4.932	0.355911
SNX17	rs112001928		Emilsson	Wald ratio	1	0.303	0.174	0.0814973	1.355	0.963	1.906	intron_variant	MODIFIER	GTF3C2	protein_coding	-	-	19.13	1.98366
CASP3	rs870825		Suhre	Wald ratio	1	0.1581	0.0909	0.0820543	1.1713	0.9801	1.3997	intron_variant	MODIFIER	PRIMPOL	protein_coding	-	-	2.844	0.175084
HGF	rs984534		Emilsson	Wald ratio	1	-0.301	0.173	0.0829932	0.74	0.527	1.04	intron_variant	MODIFIER	HGF	protein_coding	-	-	4.432	0.312342
HGF.2681.23.2	rs5745695		Sun	Wald ratio	1	-0.242	0.14	0.0839988	0.785	0.597	1.033	intron_variant	MODIFIER	HGF	protein_coding	-	-	0.267	-0.332092
PI3.4982.54.1	rs16989763		Sun	Wald ratio	1	0.135	0.078	0.0841744	1.144	0.982	1.333	intergenic_variant	MODIFIER	-	-	-	-	3.105	0.19836
NTNG1	rs115668827		Emilsson	Wald ratio	1	0.077	0.045	0.0845928	1.08	0.989	1.18	upstream_gene_variant	MODIFIER	NTNG1	protein_coding	-	-	5.754	0.429785
NTNG1.5637.81.3	rs115668827		Sun	Wald ratio	1	0.095	0.055	0.0845928	1.1	0.987	1.225	upstream_gene_variant	MODIFIER	NTNG1	protein_coding	-	-	5.754	0.429785
IL12B	rs983825		Emilsson	Wald ratio	1	-0.089	0.051	0.0847556	0.915	0.828	1.012	intron_variant,non_coding_transcript_variant	MODIFIER	-	lncRNA	-	-	0.823	-0.101713
ICAM1	rs901886		Emilsson	Wald ratio	1	-0.039	0.023	0.0848631	0.962	0.92	1.005	intron_variant	MODIFIER	ICAM5	protein_coding	-	-	5.434	0.400673
CST3	rs71334202		Emilsson	Wald ratio	1	0.162	0.094	0.0853816	1.176	0.978	1.414	upstream_gene_variant	MODIFIER	CST3	protein_coding	-	-	6.719	0.520647
PNP	rs1760928		Emilsson	Wald ratio	1	-0.154	0.09	0.0854076	0.857	0.719	1.022	regulatory_region_variant	MODIFIER	-	CTCF_binding_site	-	-	12.76	1.09884
SCG3	rs1456297		Emilsson	Wald ratio	1	0.1	0.058	0.0856184	1.105	0.986	1.239	regulatory_region_variant	MODIFIER	-	promoter_flanking_region	-	-	10.59	0.914817
CCL25	rs3848570		Suhre	Wald ratio	1	-0.1085	0.0632	0.0862504	0.8972	0.7926	1.0156	missense_variant	MODERATE	FBN3	protein_coding	tolerated(0.07)	benign(0.041)	22.2	2.41802
POSTN.6645.53.3	rs117103342		Sun	Wald ratio	1	-0.185	0.108	0.0870407	0.831	0.672	1.027
POSTN.6650.20.3	rs117103342		Sun	Wald ratio	1	-0.165	0.096	0.0870407	0.848	0.702	1.024
PYGL.11441.11.3	rs35026927		Sun	Wald ratio	1	0.231	0.135	0.0874565	1.26	0.967	1.643	missense_variant	MODERATE	PYGL	protein_coding	deleterious(0)	probably_damaging(1)	27.3	4.04958
LANCL1	rs187097936		Emilsson	Wald ratio	1	0.346	0.203	0.0877603	1.413	0.95	2.102
CBLN4	rs6064315		Emilsson	Wald ratio	1	0.339	0.2	0.090511	1.403	0.948	2.076	downstream_gene_variant	MODIFIER	CBLN4	protein_coding	-	-	4.514	0.319421
CD59.11514.196.3	rs2273121		Sun	Wald ratio	1	0.129	0.076	0.0906404	1.138	0.98	1.321	intron_variant	MODIFIER	CD59	protein_coding	-	-	3.437	0.227106
SCG3.7957.2.3	rs1378892		Sun	Wald ratio	1	0.095	0.056	0.0910699	1.1	0.985	1.228	regulatory_region_variant	MODIFIER	-	promoter_flanking_region	-	-	0.489	-0.208712
CLEC6A	rs11829089		Emilsson	Wald ratio	1	-0.278	0.165	0.092573	0.757	0.547	1.047	intergenic_variant	MODIFIER	-	-	-	-	1.724	0.05581
PPIL1.9884.8.3	rs12194408		Sun	Wald ratio	1	-0.108	0.064	0.0928151	0.898	0.791	1.018	missense_variant	MODERATE	PPIL1	protein_coding	deleterious(0.01)	possibly_damaging(0.866)	26.1	3.84989
SLITRK3	rs62282371		Emilsson	Wald ratio	1	0.175	0.105	0.0937577	1.192	0.971	1.463	intron_variant	MODIFIER	SLITRK3	protein_coding	-	-	6.956	0.543828
TEK	rs2273720		Emilsson	Wald ratio	1	-0.157	0.094	0.0961786	0.855	0.711	1.028	intron_variant	MODIFIER	TEK	protein_coding	-	-	2.245	0.116728
LGALS3BP	rs4789847		Emilsson	Wald ratio	1	-0.284	0.171	0.0973703	0.753	0.538	1.053	intron_variant	MODIFIER	CANT1	protein_coding	-	-	4.666	0.33264
IDUA.3169.70.2	rs3822020		Sun	Wald ratio	1	0.071	0.043	0.100751	1.073	0.986	1.168	intron_variant	MODIFIER	SLC26A1	protein_coding	-	-	9.182	0.778687
LHB.8376.25.4	rs75287599	rs139643250	Sun	Wald ratio	1	-0.197	0.12	0.101292	0.821	0.648	1.039
DNAJB11	rs73887965		Emilsson	Wald ratio	1	0.096	0.059	0.101764	1.101	0.981	1.235	intron_variant	MODIFIER	-	protein_coding	-	-	5.393	0.396992
IGFBP7.3320.49.2	rs1718849		Sun	Wald ratio	1	0.126	0.077	0.101899	1.135	0.975	1.32	intron_variant	MODIFIER	IGFBP7	protein_coding	-	-	3.566	0.23817
NDST1	rs35413298		Emilsson	Wald ratio	1	-0.324	0.199	0.103404	0.723	0.489	1.068	downstream_gene_variant	MODIFIER	NDST1	protein_coding	-	-	5.415	0.398966
CREB3L4	rs4845360		Emilsson	Wald ratio	1	-0.138	0.085	0.10439	0.871	0.738	1.029	downstream_gene_variant	MODIFIER	RPS27	protein_coding	-	-	1.684	0.050584
S100A12	rs2916193		Emilsson	Wald ratio	1	-0.212	0.131	0.106	0.809	0.626	1.046	intron_variant	MODIFIER	S100A9	protein_coding	-	-	2.842	0.174882
TM	rs1042579		Folkersen	Wald ratio	1	0.121	0.075	0.106227	1.128	0.975	1.306	missense_variant	MODERATE	THBD	protein_coding	tolerated(0.47)	benign(0)	8.342	0.687755
CNTN1	rs1838343		Yao	Wald ratio	1	-0.19	0.118	0.106364	0.827	0.656	1.042	intron_variant	MODIFIER	CNTN1	protein_coding	-	-	0.268	-0.331083
CCL16.4913.78.1	rs112689088		Sun	Wald ratio	1	0.045	0.028	0.106815	1.046	0.99	1.105	intron_variant	MODIFIER	CCL16	protein_coding	-	-	0.529	-0.192859
CEACAM19	rs28483039		Emilsson	Wald ratio	1	0.371	0.231	0.107749	1.449	0.922	2.277	intron_variant	MODIFIER	PVR	protein_coding	-	-	0.961	-0.069222
FUT8.8244.16.3	rs2127870		Sun	Wald ratio	1	-0.043	0.027	0.109131	0.958	0.908	1.01	downstream_gene_variant	MODIFIER	MIR4708	miRNA	-	-	3.895	0.266248
CTGF	rs9388953		Emilsson	Wald ratio	1	-0.127	0.079	0.109599	0.881	0.754	1.029	intron_variant,non_coding_transcript_variant	MODIFIER	-	lncRNA	-	-	0.264	-0.334362
CNTN4.3298.52.2	rs163352		Sun	Wald ratio	1	-0.157	0.098	0.110576	0.855	0.705	1.036	3_prime_UTR_variant	MODIFIER	CNTN4	protein_coding	-	-	15.41	1.45021
SELP.4154.57.2	rs6136		Sun	Wald ratio	1	-0.075	0.047	0.111011	0.928	0.846	1.017	missense_variant	MODERATE	SELP	protein_coding	tolerated(0.26)	possibly_damaging(0.642)	14.56	1.32436
SELP	rs6136		Emilsson	Wald ratio	1	-0.058	0.036	0.111011	0.944	0.879	1.013	missense_variant	MODERATE	SELP	protein_coding	tolerated(0.26)	possibly_damaging(0.642)	14.56	1.32436
SELP	rs6136		Suhre	Wald ratio	1	-0.0786	0.0493	0.111011	0.9244	0.8391	1.0182	missense_variant	MODERATE	SELP	protein_coding	tolerated(0.26)	possibly_damaging(0.642)	14.56	1.32436
CCL22.3508.78.3	rs41398344		Sun	Wald ratio	1	0.149	0.094	0.113072	1.16	0.965	1.395
TBCE	rs10802708		Emilsson	Wald ratio	1	0.247	0.157	0.1154	1.281	0.941	1.743	intron_variant	MODIFIER	TBCE	protein_coding	-	-	1.054	-0.0499
CNTN2.3296.92.2	rs2071533		Sun	Wald ratio	1	0.072	0.046	0.115519	1.075	0.983	1.175	upstream_gene_variant	MODIFIER	CNTN2	protein_coding	-	-	17.13	1.71519
BST1.4535.50.2	rs73224660		Sun	Wald ratio	1	-0.036	0.023	0.116706	0.965	0.922	1.009	intron_variant	MODIFIER	BST1	protein_coding	-	-	1.865	0.073524
CCL20	rs4973334		Folkersen	Wald ratio	1	0.432	0.276	0.117193	1.541	0.897	2.646	regulatory_region_variant	MODIFIER	-	promoter_flanking_region	-	-	1.62	0.041956
SERPINF2.3024.18.2	rs11657394		Sun	Wald ratio	1	-0.227	0.145	0.117877	0.797	0.6	1.059	missense_variant	MODERATE	WDR81	protein_coding	tolerated(0.07)	benign(0.019)	8.733	0.730385
TNFRSF10B	rs4871844		Emilsson	Wald ratio	1	0.276	0.176	0.117937	1.317	0.933	1.861	3_prime_UTR_variant	MODIFIER	TNFRSF10B	protein_coding	-	-	1.251	-0.013836
CSK	rs11636952		Emilsson	Wald ratio	1	-0.239	0.153	0.117937	0.788	0.584	1.062	intron_variant	MODIFIER	LMAN1L	protein_coding	-	-	1.099	-0.041022
APMAP.10605.22.3	rs8125909		Sun	Wald ratio	1	0.183	0.117	0.118297	1.2	0.955	1.51	upstream_gene_variant	MODIFIER	APMAP	protein_coding	-	-	5.73	0.427547
CYTL1	rs62291616		Emilsson	Wald ratio	1	0.143	0.092	0.118352	1.154	0.964	1.38	upstream_gene_variant	MODIFIER	STK32B	protein_coding	-	-	0.269	-0.330552
SVEP1	rs78742138		Emilsson	Wald ratio	1	0.171	0.109	0.118656	1.186	0.957	1.47	intron_variant	MODIFIER	SVEP1	protein_coding	-	-	0.901	-0.08255
IL6R	rs2228145		Emilsson	Wald ratio	1	-0.038	0.024	0.118721	0.963	0.918	1.01	missense_variant	MODERATE	IL6R	protein_coding	tolerated(0.08)	benign(0.02)	14.52	1.31842
OLFM1	rs11103667		Emilsson	Wald ratio	1	-0.245	0.158	0.119727	0.783	0.575	1.066	upstream_gene_variant	MODIFIER	OLFM1	protein_coding	-	-	7.919	0.642426
CCL15.14109.15.3	rs854624		Sun	Wald ratio	1	-0.042	0.027	0.120854	0.959	0.909	1.011	intron_variant	MODIFIER	CCL15	protein_coding	-	-	3.277	0.213367
PLA2R1.10916.44.3	rs3749117		Sun	Wald ratio	1	-0.04	0.026	0.121296	0.961	0.913	1.011	missense_variant	MODERATE	PLA2R1	protein_coding	tolerated(0.06)	benign(0.011)	20.8	2.1901
sICAM1	rs5498		Yao	Wald ratio	1	0.22	0.142	0.121594	1.246	0.943	1.647	missense_variant	MODERATE	ICAM1	protein_coding	tolerated(1)	benign(0)	5.351	0.393197
ICAM1	rs5498		Suhre	Wald ratio	1	-0.0304	0.0196	0.121594	0.9701	0.9334	1.0081	missense_variant	MODERATE	ICAM1	protein_coding	tolerated(1)	benign(0)	5.351	0.393197
ICAM1.4342.10.3	rs5498		Sun	Wald ratio	1	-0.031	0.02	0.121594	0.97	0.932	1.008	missense_variant	MODERATE	ICAM1	protein_coding	tolerated(1)	benign(0)	5.351	0.393197
ICAM5	rs5498		Suhre	Wald ratio	1	0.0724	0.0468	0.121594	1.0751	0.9809	1.1783	missense_variant	MODERATE	ICAM1	protein_coding	tolerated(1)	benign(0)	5.351	0.393197
ACP5	rs10424332		Emilsson	Wald ratio	1	-0.181	0.117	0.122236	0.835	0.664	1.05	upstream_gene_variant	MODIFIER	ZNF627	protein_coding	-	-	1.902	0.078086
FABP1	rs1545223		Emilsson	Wald ratio	1	-0.156	0.101	0.122236	0.855	0.701	1.043	intron_variant	MODIFIER	FABP1	protein_coding	-	-	5.179	0.377816
NAAA	rs58317633		Emilsson	Wald ratio	1	-0.056	0.036	0.122323	0.945	0.88	1.015	intron_variant	MODIFIER	NAAA	protein_coding	-	-	5.901	0.443276
CFHR5	rs6685931		Emilsson	Wald ratio	1	-0.14	0.09	0.12307	0.87	0.728	1.039	intron_variant	MODIFIER	CFHR4	protein_coding	-	-	3.583	0.239665
NUDT12.13947.371.3	rs74692061		Sun	Wald ratio	1	-0.13	0.084	0.123283	0.878	0.745	1.036	intergenic_variant	MODIFIER	-	-	-	-	2.549	0.147434
OAS1	rs11066452		Emilsson	Wald ratio	1	0.259	0.168	0.123936	1.295	0.932	1.8	downstream_gene_variant	MODIFIER	OAS1	protein_coding	-	-	4.072	0.281411
PSMB1	rs756519		Emilsson	Wald ratio	1	0.089	0.058	0.125125	1.093	0.976	1.224	intron_variant	MODIFIER	PSMB1	protein_coding	-	-	9.695	0.830034
CDCP1	rs7621542		Emilsson	Wald ratio	1	-0.254	0.166	0.125139	0.776	0.561	1.073	upstream_gene_variant	MODIFIER	RPS24P8	processed_pseudogene	-	-	6.734	0.522155
IL6R	rs4129267		Suhre	Wald ratio	1	-0.0307	0.02	0.125262	0.9698	0.9324	1.0086	intron_variant	MODIFIER	IL6R	protein_coding	-	-	9.751	0.835507
CD4	rs61916275		Emilsson	Wald ratio	1	0.403	0.263	0.125599	1.496	0.893	2.505	intron_variant	MODIFIER	CD4	protein_coding	-	-	7.863	0.636537
MMP10	rs17878931		Emilsson	Wald ratio	1	-0.109	0.071	0.125776	0.897	0.78	1.031	intron_variant	MODIFIER	MMP1	protein_coding	-	-	0.061	-0.636616
AMIGO2	rs832716		Emilsson	Wald ratio	1	-0.334	0.219	0.126286	0.716	0.466	1.099	intron_variant	MODIFIER	PCED1B	protein_coding	-	-	1.163	-0.029117
BST1	rs16892260		Emilsson	Wald ratio	1	-0.032	0.021	0.126438	0.968	0.929	1.009	intron_variant	MODIFIER	BST1	protein_coding	-	-	3.165	0.203602
SERPINA9	rs76524332		Emilsson	Wald ratio	1	-0.298	0.195	0.126821	0.742	0.507	1.088	downstream_gene_variant	MODIFIER	SERPINA11	protein_coding	-	-	0.319	-0.295577
FABP4	rs1304403		Emilsson	Wald ratio	1	-0.313	0.205	0.12718	0.731	0.489	1.093	intron_variant,non_coding_transcript_variant	MODIFIER	-	lncRNA	-	-	4.175	0.290248
PPIL1	rs10440825		Emilsson	Wald ratio	1	-0.184	0.12	0.127224	0.832	0.657	1.054	intron_variant	MODIFIER	CPNE5	protein_coding	-	-	8.76	0.733384
ARSB	rs672413		Suhre	Wald ratio	1	0.1046	0.0688	0.12859	1.1103	0.9701	1.2706	intron_variant	MODIFIER	ARSB	protein_coding	-	-	0.619	-0.160936
AHSG	rs13098866		Emilsson	Wald ratio	1	-0.04	0.026	0.129862	0.961	0.913	1.012	downstream_gene_variant	MODIFIER	AHSG	protein_coding	-	-	1.376	0.006363
IL-6RA	rs12126142		Folkersen	Wald ratio	1	-0.038	0.025	0.130948	0.963	0.917	1.011	intron_variant	MODIFIER	IL6R	protein_coding	-	-	0.786	-0.111198
CLEC3B	rs2056320		Yao	Wald ratio	1	0.2	0.133	0.131341	1.222	0.942	1.585	intergenic_variant	MODIFIER	-	-	-	-	0.861	-0.092089
DLK1	rs10144381		Emilsson	Wald ratio	1	0.098	0.066	0.133111	1.103	0.97	1.255	regulatory_region_variant	MODIFIER	-	promoter_flanking_region	-	-	1.716	0.054754
NPTX1.9256.78.3	rs62069681		Sun	Wald ratio	1	-0.123	0.082	0.133921	0.884	0.752	1.039	intron_variant	MODIFIER	RPTOR	protein_coding	-	-	0.704	-0.134422
HYAL1	rs35768187		Emilsson	Wald ratio	1	-0.334	0.223	0.134075	0.716	0.463	1.108	intron_variant	MODIFIER	SLC38A3	protein_coding	-	-	0.116	-0.505078
LIPN.8097.77.3	rs10509554		Sun	Wald ratio	1	-0.037	0.025	0.134637	0.963	0.917	1.012	intron_variant	MODIFIER	LIPN	protein_coding	-	-	5.237	0.382968
LIPN	rs10509554		Emilsson	Wald ratio	1	-0.07	0.047	0.134637	0.932	0.85	1.022	intron_variant	MODIFIER	LIPN	protein_coding	-	-	5.237	0.382968
IL1RL1	rs12712135		Suhre	Wald ratio	1	-0.0512	0.0342	0.134725	0.9501	0.8885	1.016	intron_variant	MODIFIER	IL1RL1	protein_coding	-	-	5.312	0.389661
CHST12	rs2969076	rs2398634	Emilsson	Wald ratio	1	-0.235	0.157	0.13502	0.79	0.58	1.076
DUSP28	rs113909935	rs5030952	Emilsson	Wald ratio	1	-0.334	0.224	0.135702	0.716	0.461	1.111
CREB3L4.11308.8.3	rs4845586		Sun	Wald ratio	1	-0.137	0.092	0.135843	0.872	0.729	1.044	downstream_gene_variant	MODIFIER	JTB	protein_coding	-	-	1.367	0.004965
LGALS4	rs55945853		Emilsson	Wald ratio	1	0.192	0.129	0.138099	1.211	0.94	1.561	intron_variant	MODIFIER	CAPN12	protein_coding	-	-	2.058	0.096315
CA11	rs2617805		Emilsson	Wald ratio	1	-0.319	0.216	0.139893	0.727	0.476	1.11	intron_variant	MODIFIER	FAM83E	protein_coding	-	-	7.284	0.576674
ANGPTL3	rs7547965		Emilsson	Wald ratio	1	0.159	0.108	0.141144	1.172	0.949	1.448	intron_variant	MODIFIER	DOCK7	protein_coding	-	-	10.28	0.885602
GP5	rs34072658		Emilsson	Wald ratio	1	-0.35	0.238	0.141151	0.705	0.443	1.123	intron_variant	MODIFIER	ATP13A3	protein_coding	-	-	1.251	-0.013884
IGF2R	rs629849		Emilsson	Wald ratio	1	0.081	0.055	0.141358	1.084	0.974	1.207	missense_variant	MODERATE	IGF2R	protein_coding	tolerated(1)	benign(0)	16.97	1.6918
APOD	rs73196127		Emilsson	Wald ratio	1	0.403	0.274	0.141995	1.496	0.874	2.563	intron_variant	MODIFIER	PPP1R2	protein_coding	-	-	1.628	0.042996
IGF2R	rs600324		Suhre	Wald ratio	1	0.0535	0.0365	0.142517	1.0549	0.9822	1.1331	intron_variant	MODIFIER	IGF2R	protein_coding	-	-	0.643	-0.153175
OAS1.10361.25.3	rs4767027		Sun	Wald ratio	1	0.135	0.092	0.142685	1.145	0.955	1.371	downstream_gene_variant	MODIFIER	OAS1	protein_coding	-	-	0.724	-0.128324
DPP7.8346.9.3	rs10747049		Sun	Wald ratio	1	-0.118	0.08	0.142715	0.889	0.76	1.04	missense_variant	MODERATE	DPP7	protein_coding	tolerated(1)	benign(0)	16.47	1.61467
HPGDS.12549.33.3	rs1965049		Sun	Wald ratio	1	0.08	0.054	0.143075	1.083	0.973	1.205	upstream_gene_variant	MODIFIER	HPGDS	protein_coding	-	-	0.716	-0.130736
HPX	rs12806581		Emilsson	Wald ratio	1	0.378	0.259	0.144635	1.459	0.878	2.424	upstream_gene_variant	MODIFIER	HPX	protein_coding	-	-	1.189	-0.02455
KLK10	rs2569454		Emilsson	Wald ratio	1	-0.101	0.07	0.147404	0.904	0.788	1.036	upstream_gene_variant	MODIFIER	KLK10	protein_coding	-	-	11.33	0.976573
PAR-1	rs250727		Folkersen	Wald ratio	1	0.283	0.196	0.147951	1.328	0.904	1.949	regulatory_region_variant	MODIFIER	-	enhancer	-	-	4.614	0.328102
IL17RB	rs4453827		Suhre	Wald ratio	1	-0.1216	0.0841	0.148057	0.8855	0.7509	1.0441	intron_variant	MODIFIER	CACNA1D	protein_coding	-	-	0.021	-0.836
B3GAT3.6897.38.3	rs12794886	rs489778	Sun	Wald ratio	1	-0.083	0.058	0.14947	0.92	0.821	1.03
NTN4.3327.27.1	rs17288108		Sun	Wald ratio	1	0.162	0.113	0.149614	1.176	0.943	1.467	missense_variant	MODERATE	NTN4	protein_coding	tolerated(0.53)	benign(0)	15.31	1.4346
NTN4	rs17288108		Emilsson	Wald ratio	1	0.188	0.13	0.149614	1.207	0.935	1.558	missense_variant	MODERATE	NTN4	protein_coding	tolerated(0.53)	benign(0)	15.31	1.4346
TRAIL-R2	rs2293400		Folkersen	Wald ratio	1	0.118	0.083	0.151688	1.126	0.957	1.323	intron_variant	MODIFIER	TNFRSF10B	protein_coding	-	-	1.578	0.036074
FUT8	rs4902389		Emilsson	Wald ratio	1	-0.027	0.019	0.152697	0.973	0.938	1.01	intergenic_variant	MODIFIER	-	-	-	-	2.566	0.149066
AKR7A2	rs144376466	rs112053480	Emilsson	Wald ratio	1	0.137	0.096	0.15352	1.147	0.95	1.385
HPGDS	rs11097414		Emilsson	Wald ratio	1	0.084	0.059	0.153644	1.088	0.969	1.221	intron_variant	MODIFIER	HPGDS	protein_coding	-	-	0.683	-0.140632
KREMEN1.6512.68.3	rs77320622		Sun	Wald ratio	1	-0.203	0.142	0.153679	0.816	0.617	1.079
TPST2	rs9608491		Emilsson	Wald ratio	1	-0.219	0.154	0.154294	0.803	0.595	1.086	intron_variant	MODIFIER	HPS4	protein_coding	-	-	1.593	0.038284
DLK1.6496.60.3	rs12881760		Sun	Wald ratio	1	0.068	0.048	0.15441	1.071	0.975	1.176	regulatory_region_variant	MODIFIER	-	CTCF_binding_site	-	-	8.187	0.671026
LBP	rs73112473	rs2232613	Emilsson	Wald ratio	1	0.062	0.044	0.154436	1.064	0.977	1.159
CD177	rs73937410	rs59992228	Emilsson	Wald ratio	1	-0.098	0.069	0.156453	0.907	0.792	1.038
SERPINA1	rs4905192		Emilsson	Wald ratio	1	-0.238	0.168	0.1571	0.789	0.568	1.096	downstream_gene_variant	MODIFIER	SERPINA2	polymorphic_pseudogene	-	-	0.947	-0.072202
IL27RA.5132.71.3	rs35026308		Sun	Wald ratio	1	0.054	0.038	0.157117	1.056	0.979	1.139	missense_variant	MODERATE	IL27RA	protein_coding	tolerated(0.13)	benign(0.062)	12.56	1.07949
KLK8	rs10410942		Emilsson	Wald ratio	1	-0.12	0.085	0.157907	0.887	0.751	1.048	downstream_gene_variant	MODIFIER	KLK9	protein_coding	-	-	7.528	0.601548
WFDC2	rs73112720		Emilsson	Wald ratio	1	-0.315	0.225	0.161513	0.73	0.469	1.134	intron_variant	MODIFIER	WFDC8	protein_coding	-	-	0.569	-0.178066
CGA.CGB.4914.10.1	rs79785970		Sun	Wald ratio	1	0.066	0.047	0.161628	1.068	0.974	1.172	intron_variant	MODIFIER	RUVBL2	protein_coding	-	-	0.056	-0.652354
C3	rs163494		Emilsson	Wald ratio	1	-0.177	0.126	0.161693	0.838	0.655	1.073	upstream_gene_variant	MODIFIER	C3	protein_coding	-	-	0.675	-0.143071
RGMA	rs11074135		Emilsson	Wald ratio	1	-0.234	0.167	0.161956	0.791	0.57	1.098	intron_variant	MODIFIER	RGMA	protein_coding	-	-	6.31	0.481527
FCN1	rs10858300		Suhre	Wald ratio	1	-0.0907	0.0653	0.164677	0.9133	0.8036	1.0379	intergenic_variant	MODIFIER	-	-	-	-	3.763	0.255021
IL12B.IL23A.10365.132.3	rs4921484		Sun	Wald ratio	1	-0.114	0.082	0.164801	0.892	0.759	1.048	intron_variant,non_coding_transcript_variant	MODIFIER	-	lncRNA	-	-	0.249	-0.345943
SERPINA3	rs6575449		Suhre	Wald ratio	1	-0.0988	0.0713	0.165636	0.9059	0.7877	1.0417	upstream_gene_variant	MODIFIER	ADIPOR1P2	processed_pseudogene	-	-	2.086	0.099438
ART3	rs4859610		Emilsson	Wald ratio	1	-0.152	0.11	0.166508	0.859	0.693	1.065	intron_variant	MODIFIER	ART3	protein_coding	-	-	4.598	0.326756
ART3.7970.315.3	rs4859610		Sun	Wald ratio	1	-0.114	0.083	0.166508	0.892	0.759	1.049	intron_variant	MODIFIER	ART3	protein_coding	-	-	4.598	0.326756
B3GAT3	rs693698		Emilsson	Wald ratio	1	-0.071	0.052	0.168379	0.932	0.842	1.03	intron_variant	MODIFIER	LBHD1	protein_coding	-	-	6.722	0.520984
SCF	rs11608458		Folkersen	Wald ratio	1	0.48	0.349	0.168497	1.616	0.816	3.2	intergenic_variant	MODIFIER	-	-	-	-	2.13	0.104322
CST3	rs6036478		Suhre	Wald ratio	1	0.0992	0.0721	0.168857	1.1043	0.9587	1.272	downstream_gene_variant	MODIFIER	CST3	protein_coding	-	-	0.368	-0.266122
WFIKKN1	rs11248941		Emilsson	Wald ratio	1	0.202	0.147	0.168872	1.224	0.918	1.632	intron_variant	MODIFIER	RAB40C	protein_coding	-	-	1.388	0.008283
PDE5A	rs4834770		Suhre	Wald ratio	1	0.1038	0.0755	0.168968	1.1094	0.9568	1.2863	missense_variant	MODERATE	FABP2	protein_coding	tolerated(0.23)	benign(0)	13.06	1.13105
B3GALTL	rs9544399		Emilsson	Wald ratio	1	0.138	0.101	0.171357	1.148	0.942	1.398	intron_variant	MODIFIER	B3GLCT	protein_coding	-	-	6.02	0.454279
CCL5	rs2107538	rs7211393	Emilsson	Wald ratio	1	-0.106	0.078	0.171833	0.899	0.772	1.047
CD14	rs3138074		Yao	Wald ratio	1	0.112	0.082	0.171845	1.119	0.952	1.315	upstream_gene_variant	MODIFIER	CD14	protein_coding	-	-	2.215	0.113576
MANEA	rs4413619		Emilsson	Wald ratio	1	-0.035	0.025	0.173204	0.966	0.919	1.015	upstream_gene_variant	MODIFIER	-	processed_pseudogene	-	-	2.953	0.184927
IL1RAP	rs1024948		Suhre	Wald ratio	1	-0.0345	0.0254	0.173351	0.966	0.9192	1.0153	intron_variant	MODIFIER	IL1RAP	protein_coding	-	-	8.133	0.665246
TMEM132C	rs28654182		Emilsson	Wald ratio	1	-0.121	0.089	0.17383	0.886	0.745	1.055	intron_variant	MODIFIER	TMEM132C	protein_coding	-	-	4.881	0.351451
IL1RAP	rs724609		Emilsson	Wald ratio	1	-0.031	0.023	0.174273	0.97	0.928	1.014	intron_variant	MODIFIER	IL1RAP	protein_coding	-	-	5.352	0.393258
ADIPOQ	rs143257534		Emilsson	Wald ratio	1	-0.23	0.17	0.174516	0.794	0.57	1.108	intergenic_variant	MODIFIER	-	-	-	-	0.379	-0.260377
ANKRD27	rs113282417		Emilsson	Wald ratio	1	0.214	0.158	0.175516	1.239	0.909	1.689	intron_variant	MODIFIER	NUDT19	protein_coding	-	-	2.237	0.115926
TMEM132C.7173.141.3	rs11059617		Sun	Wald ratio	1	-0.15	0.111	0.175924	0.861	0.693	1.069	intron_variant	MODIFIER	TMEM132C	protein_coding	-	-	1.505	0.025691
CA10	rs2202237		Emilsson	Wald ratio	1	0.206	0.153	0.176074	1.229	0.912	1.658	intron_variant	MODIFIER	CA10	protein_coding	-	-	1.287	-0.007897
CA8	rs7009482		Emilsson	Wald ratio	1	0.17	0.126	0.176948	1.186	0.926	1.518	upstream_gene_variant	MODIFIER	CA8	protein_coding	-	-	6.604	0.509562
MMP9.2579.17.5	rs2250889		Sun	Wald ratio	1	0.125	0.092	0.177155	1.133	0.945	1.358	missense_variant	MODERATE	MMP9	protein_coding	tolerated(0.08)	benign(0)	18.58	1.91183
THBS3	rs2306125		Emilsson	Wald ratio	1	-0.36	0.268	0.178406	0.697	0.413	1.179	downstream_gene_variant	MODIFIER	DCST1	protein_coding	-	-	1.534	0.029935
RGMB.3331.8.1	rs1563317		Sun	Wald ratio	1	0.147	0.109	0.179201	1.158	0.935	1.434	regulatory_region_variant	MODIFIER	-	promoter_flanking_region	-	-	2.863	0.176754
VASN	rs8182173		Emilsson	Wald ratio	1	-0.335	0.25	0.179655	0.715	0.438	1.167	intron_variant	MODIFIER	CORO7	protein_coding	-	-	16.35	1.59675
PILRA	rs12539172		Emilsson	Wald ratio	1	-0.027	0.02	0.179893	0.974	0.936	1.012	3_prime_UTR_variant	MODIFIER	NYAP1	protein_coding	-	-	0.065	-0.624024
FLRT2	rs6574818		Emilsson	Wald ratio	1	-0.167	0.124	0.179978	0.847	0.664	1.08	intron_variant,non_coding_transcript_variant	MODIFIER	-	lncRNA	-	-	0.349	-0.277179
TXNDC5	rs182714900		Emilsson	Wald ratio	1	0.304	0.227	0.180085	1.355	0.869	2.115
LAMA4	rs116988496		Emilsson	Wald ratio	1	0.367	0.274	0.180458	1.443	0.844	2.469	intergenic_variant	MODIFIER	-	-	-	-	2.348	0.127486
SIRPB1.6247.9.3	rs3848788		Sun	Wald ratio	1	0.046	0.035	0.181154	1.047	0.979	1.121	intron_variant	MODIFIER	-	protein_coding	-	-	2.427	0.13543
SERPINA1	rs2749534		Suhre	Wald ratio	1	-0.0883	0.066	0.181262	0.9155	0.8043	1.042	intergenic_variant	MODIFIER	-	-	-	-	0.169	-0.426269
CA-125	rs11672713	rs7257770	Folkersen	Wald ratio	1	0.225	0.168	0.181342	1.252	0.9	1.742
IGFBP7	rs2412776		Suhre	Wald ratio	1	0.088	0.0659	0.181675	1.092	0.9597	1.2426	intron_variant	MODIFIER	IGFBP7	protein_coding	-	-	0.61	-0.164043
ANGPT1	rs73701100		Emilsson	Wald ratio	1	0.216	0.162	0.181951	1.241	0.904	1.703	intron_variant	MODIFIER	ANGPT1	protein_coding	-	-	0.304	-0.305475
ALDH3A1.11480.1.3	rs887241		Sun	Wald ratio	1	0.137	0.102	0.181982	1.147	0.938	1.401	missense_variant	MODERATE	ALDH3A1	protein_coding	tolerated(0.88)	benign(0)	4.686	0.334355
CNTN2	rs1572995		Emilsson	Wald ratio	1	0.065	0.049	0.18211	1.068	0.97	1.175	intron_variant	MODIFIER	CNTN2	protein_coding	-	-	0.077	-0.589767
AGT	rs3789678		Emilsson	Wald ratio	1	-0.151	0.113	0.182422	0.86	0.689	1.073	intron_variant	MODIFIER	AGT	protein_coding	-	-	0.477	-0.213967
CLEC12A	rs7970682		Emilsson	Wald ratio	1	0.031	0.023	0.182422	1.031	0.986	1.078	upstream_gene_variant	MODIFIER	CLEC12B	protein_coding	-	-	0.716	-0.130855
ERAP1	rs17482078		Suhre	Wald ratio	1	0.034	0.0255	0.182422	1.0346	0.9842	1.0875	missense_variant	MODERATE	ERAP1	protein_coding	deleterious(0)	probably_damaging(0.963)	25.1	3.6294
ERAP1.4964.67.1	rs17482078		Sun	Wald ratio	1	0.04	0.03	0.182422	1.041	0.981	1.105	missense_variant	MODERATE	ERAP1	protein_coding	deleterious(0)	probably_damaging(0.963)	25.1	3.6294
SCARF2.8956.96.3	rs738086		Sun	Wald ratio	1	-0.132	0.099	0.18279	0.876	0.721	1.064	downstream_gene_variant	MODIFIER	SCARF2	protein_coding	-	-	0.854	-0.093801
CHRDL2	rs11236228		Emilsson	Wald ratio	1	-0.102	0.077	0.185301	0.903	0.777	1.05	intron_variant	MODIFIER	CHRDL2	protein_coding	-	-	0.835	-0.09866
PRDX6	rs6671141		Emilsson	Wald ratio	1	-0.096	0.072	0.186478	0.909	0.789	1.047	intron_variant	MODIFIER	PRDX6	protein_coding	-	-	7.759	0.62558
TNFSF12.5939.42.3	rs12941509		Sun	Wald ratio	1	-0.091	0.069	0.18649	0.913	0.798	1.045	upstream_gene_variant	MODIFIER	TNFSF12-TNFSF13	protein_coding	-	-	0.135	-0.472781
Gal-3	rs76480089		Folkersen	Wald ratio	1	0.095	0.072	0.186773	1.099	0.955	1.266	downstream_gene_variant	MODIFIER	ATG14	protein_coding	-	-	0.414	-0.242148
IL17RA	rs3827278		Suhre	Wald ratio	1	0.0388	0.0294	0.187814	1.0395	0.9813	1.1013	downstream_gene_variant	MODIFIER	TMEM121B	protein_coding	-	-	3.571	0.238601
GPC5	rs342702		Emilsson	Wald ratio	1	-0.041	0.031	0.187908	0.959	0.902	1.02	intron_variant	MODIFIER	GPC5	protein_coding	-	-	1.711	0.054157
GPC5.4991.12.1	rs342702		Sun	Wald ratio	1	-0.043	0.033	0.187908	0.958	0.899	1.021	intron_variant	MODIFIER	GPC5	protein_coding	-	-	1.711	0.054157
KDELC2	rs74911261		Emilsson	Wald ratio	1	0.062	0.047	0.189103	1.064	0.97	1.168	missense_variant	MODERATE	POGLUT3	protein_coding	deleterious(0)	probably_damaging(0.998)	26	3.82514
KDELC2.8296.117.3	rs74911261		Sun	Wald ratio	1	0.076	0.058	0.189103	1.079	0.963	1.209	missense_variant	MODERATE	POGLUT3	protein_coding	deleterious(0)	probably_damaging(0.998)	26	3.82514
MRC1	rs12243310		Emilsson	Wald ratio	1	-0.269	0.205	0.189883	0.764	0.511	1.142	intron_variant	MODIFIER	SLC39A12	protein_coding	-	-	0.658	-0.148458
ADH5	rs1453873		Emilsson	Wald ratio	1	0.12	0.092	0.190079	1.128	0.942	1.351	intron_variant,non_coding_transcript_variant	MODIFIER	-	lncRNA	-	-	2.344	0.127062
CHI3L1.11104.13.3	rs10920578		Sun	Wald ratio	1	-0.031	0.024	0.190656	0.97	0.926	1.016	intron_variant	MODIFIER	CHI3L1	protein_coding	-	-	4.83	0.346973
NPNT	rs78213340		Emilsson	Wald ratio	1	0.184	0.14	0.190741	1.202	0.913	1.583	intron_variant	MODIFIER	NPNT	protein_coding	-	-	17.79	1.80799
CA3	rs10504813		Emilsson	Wald ratio	1	0.236	0.181	0.190978	1.267	0.889	1.805	intron_variant	MODIFIER	CA2	protein_coding	-	-	0.289	-0.315768
CCL15	rs7221769		Suhre	Wald ratio	1	-0.0431	0.033	0.191082	0.9578	0.8979	1.0217	upstream_gene_variant	MODIFIER	-	lncRNA	-	-
CXCL12	rs148502670		Emilsson	Wald ratio	1	0.698	0.534	0.191091	2.01	0.706	5.721
SFRP1	rs1838964	rs1562420	Emilsson	Wald ratio	1	-0.274	0.209	0.191511	0.761	0.505	1.147
SIRPB1	rs4814391		Emilsson	Wald ratio	1	-0.043	0.033	0.194098	0.957	0.897	1.022	upstream_gene_variant	MODIFIER	-	protein_coding	-	-	2.344	0.127089
COLGALT1	rs73525772		Emilsson	Wald ratio	1	0.327	0.252	0.194214	1.387	0.846	2.275	intron_variant	MODIFIER	COLGALT1	protein_coding	-	-	12.08	1.03718
ECM1	rs13294		Suhre	Wald ratio	1	0.0366	0.0283	0.195033	1.0373	0.9814	1.0964	missense_variant	MODERATE	ECM1	protein_coding	tolerated(1)	benign(0)	14.8	1.35844
TREM2	rs114812713		Emilsson	Wald ratio	1	0.276	0.213	0.195123	1.318	0.868	2.003	downstream_gene_variant	MODIFIER	APOBEC2	protein_coding	-	-	0.511	-0.199912
FABP1.11516.7.3	rs2241883		Sun	Wald ratio	1	-0.174	0.134	0.196022	0.841	0.646	1.094	missense_variant	MODERATE	FABP1	protein_coding	tolerated(0.34)	benign(0.001)	17.08	1.70824
SCARF2	rs9610955		Emilsson	Wald ratio	1	-0.319	0.247	0.196714	0.727	0.448	1.18	intron_variant,NMD_transcript_variant	MODIFIER	-	nonsense_mediated_decay	-	-	15.35	1.44042
CCL15	rs1734958		Emilsson	Wald ratio	1	-0.043	0.034	0.197051	0.958	0.897	1.023	downstream_gene_variant	MODIFIER	CCL23	protein_coding	-	-	7.637	0.612883
FLRT2.13122.19.3	rs17796777		Sun	Wald ratio	1	-0.142	0.11	0.197198	0.868	0.699	1.077	intergenic_variant	MODIFIER	-	-	-	-	4.765	0.34132
FETUB	rs56112115		Emilsson	Wald ratio	1	0.105	0.082	0.197516	1.111	0.947	1.304	intron_variant,non_coding_transcript_variant	MODIFIER	-	lncRNA	-	-	1.01	-0.058649
FAS	rs982764		Emilsson	Wald ratio	1	0.126	0.098	0.197768	1.134	0.936	1.374	intron_variant	MODIFIER	FAS	protein_coding	-	-	1.835	0.069936
FAS	rs982764		Folkersen	Wald ratio	1	0.132	0.103	0.197768	1.142	0.933	1.396	intron_variant	MODIFIER	FAS	protein_coding	-	-	1.835	0.069936
PEBP1	rs76597567		Emilsson	Wald ratio	1	-0.077	0.06	0.198163	0.926	0.823	1.041	downstream_gene_variant	MODIFIER	TAOK3	protein_coding	-	-	2.659	0.157955
CD209	rs62126592		Emilsson	Wald ratio	1	-0.102	0.079	0.198898	0.903	0.773	1.055	intergenic_variant	MODIFIER	-	-	-	-	1.457	0.018792
B3GNT8	rs284663		Emilsson	Wald ratio	1	0.042	0.033	0.200197	1.043	0.978	1.111	missense_variant	MODERATE	B3GNT8	protein_coding	tolerated(0.16)	probably_damaging(0.987)	22.8	2.66769
DDX58	rs77802813		Emilsson	Wald ratio	1	-0.255	0.199	0.200359	0.775	0.524	1.145	intron_variant	MODIFIER	ACO1	protein_coding	-	-	5.515	0.407987
NID2.3633.70.5	rs1151582		Sun	Wald ratio	1	-0.078	0.061	0.200838	0.925	0.821	1.042	intron_variant	MODIFIER	NID2	protein_coding	-	-	0.015	-0.885669
PDK1	rs12052479		Suhre	Wald ratio	1	-0.0621	0.0486	0.20161	0.9398	0.8544	1.0338	intron_variant,non_coding_transcript_variant	MODIFIER	-	lncRNA	-	-	2.183	0.110123
FAS.5392.73.2	rs7911226		Sun	Wald ratio	1	0.102	0.081	0.20324	1.108	0.946	1.297	intron_variant	MODIFIER	FAS	protein_coding	-	-	3.81	0.259039
FAS.9459.7.3	rs7911226		Sun	Wald ratio	1	0.09	0.071	0.20324	1.094	0.953	1.257	intron_variant	MODIFIER	FAS	protein_coding	-	-	3.81	0.259039
CD48	rs114547897		Emilsson	Wald ratio	1	0.152	0.12	0.203525	1.165	0.921	1.473	intergenic_variant	MODIFIER	-	-	-	-	2.395	0.132204
MMP-3	rs1291326		Folkersen	Wald ratio	1	-0.306	0.241	0.203589	0.736	0.46	1.18	downstream_gene_variant	MODIFIER	-	lncRNA	-	-	4.321	0.302762
ALDH3A1	rs2108967		Emilsson	Wald ratio	1	0.162	0.127	0.204693	1.175	0.916	1.509	downstream_gene_variant	MODIFIER	ALDH3A1	protein_coding	-	-	5.681	0.423072
LGALS3	rs35070799		Suhre	Wald ratio	1	0.0867	0.0684	0.205219	1.0905	0.9537	1.247	missense_variant	MODERATE	FBXO34	protein_coding	tolerated(0.08)	benign(0.003)	9.27	0.787667
SCGB3A1	rs382266		Emilsson	Wald ratio	1	-0.271	0.214	0.206082	0.763	0.501	1.161	intron_variant	MODIFIER	FLT4	protein_coding	-	-	7.4	0.588482
SEMA3C	rs10262428		Emilsson	Wald ratio	1	-0.219	0.174	0.20623	0.803	0.571	1.128	intergenic_variant	MODIFIER	-	-	-	-	5.872	0.44062
PGLYRP2	rs55866012		Emilsson	Wald ratio	1	-0.087	0.069	0.208056	0.917	0.8	1.05	upstream_gene_variant	MODIFIER	RASAL3	protein_coding	-	-	12.25	1.05121
ISLR2.13124.20.3	rs2959011		Sun	Wald ratio	1	-0.156	0.124	0.208702	0.856	0.672	1.091	intron_variant	MODIFIER	CCDC33	protein_coding	-	-	1.916	0.079744
ERAP1	rs2013717		Emilsson	Wald ratio	1	0.033	0.026	0.209065	1.033	0.982	1.088	intron_variant	MODIFIER	ERAP1	protein_coding	-	-	3.729	0.252129
LTA4H	rs2247570		Emilsson	Wald ratio	1	-0.252	0.201	0.210201	0.778	0.525	1.153	intron_variant	MODIFIER	LTA4H	protein_coding	-	-	2.11	0.102094
PLCG2	rs9944338	rs4410068	Emilsson	Wald ratio	1	-0.286	0.228	0.210703	0.751	0.48	1.176
GPNMB	rs5850		Suhre	Wald ratio	1	0.0899	0.0721	0.212429	1.0941	0.9499	1.2602	3_prime_UTR_variant	MODIFIER	GPNMB	protein_coding	-	-	0.176	-0.417735
COCH.7227.75.3	rs34907608		Sun	Wald ratio	1	-0.092	0.074	0.212596	0.912	0.788	1.054	regulatory_region_variant	MODIFIER	-	promoter_flanking_region	-	-	0.546	-0.186693
BPIFB1	rs7263028		Emilsson	Wald ratio	1	-0.162	0.13	0.213726	0.851	0.66	1.098	intergenic_variant	MODIFIER	-	-	-	-	0.07	-0.607484
HMHA1	rs76957023		Emilsson	Wald ratio	1	-0.287	0.231	0.214007	0.75	0.477	1.18	intron_variant	MODIFIER	ARHGAP45	protein_coding	-	-	3.905	0.267156
CTSL1	rs2274611		Folkersen	Wald ratio	1	0.243	0.196	0.214033	1.275	0.869	1.872	intron_variant	MODIFIER	CTSL	protein_coding	-	-	0.597	-0.168395
ATP1B2.7218.87.3	rs1642762		Sun	Wald ratio	1	-0.105	0.085	0.214309	0.9	0.762	1.063	5_prime_UTR_variant	MODIFIER	ATP1B2	protein_coding	-	-	10.83	0.935787
GPC5	rs342706		Suhre	Wald ratio	1	-0.0379	0.0305	0.215144	0.9628	0.9069	1.0223	intron_variant	MODIFIER	GPC5	protein_coding	-	-	1.042	-0.052206
RNASE3	rs2771316		Emilsson	Wald ratio	1	0.166	0.134	0.216112	1.18	0.908	1.535	upstream_gene_variant	MODIFIER	RN7SL189P	misc_RNA	-	-	4.371	0.307088
SPINT1	rs35395149		Emilsson	Wald ratio	1	0.22	0.178	0.217501	1.246	0.879	1.766	regulatory_region_variant	MODIFIER	-	promoter_flanking_region	-	-	2.995	0.188667
PENK.9076.25.3	rs2670014		Sun	Wald ratio	1	0.061	0.05	0.217666	1.063	0.964	1.173	intron_variant,non_coding_transcript_variant	MODIFIER	-	lncRNA	-	-	14.07	1.25694
PENK	rs2670014		Emilsson	Wald ratio	1	0.068	0.055	0.217666	1.07	0.961	1.191	intron_variant,non_coding_transcript_variant	MODIFIER	-	lncRNA	-	-	14.07	1.25694
IL16	rs11072996		Suhre	Wald ratio	1	-0.1048	0.0857	0.220985	0.9005	0.7613	1.0651	intron_variant	MODIFIER	IL16	protein_coding	-	-	1.88	0.075365
IL16	rs4778639		Folkersen	Wald ratio	1	-0.053	0.043	0.221216	0.949	0.872	1.032	downstream_gene_variant	MODIFIER	STARD5	protein_coding	-	-	0.211	-0.380587
IL16.2774.10.3	rs4778639		Sun	Wald ratio	1	-0.074	0.061	0.221216	0.929	0.825	1.046	downstream_gene_variant	MODIFIER	STARD5	protein_coding	-	-	0.211	-0.380587
ITIH2	rs73621225		Emilsson	Wald ratio	1	-0.052	0.043	0.222209	0.949	0.873	1.032	upstream_gene_variant	MODIFIER	ITIH2	protein_coding	-	-	0.254	-0.342271
COCH	rs35561078		Emilsson	Wald ratio	1	-0.089	0.073	0.223364	0.914	0.792	1.056	upstream_gene_variant	MODIFIER	COCH	protein_coding	-	-	7.793	0.629136
GFRA1	rs4269847		Emilsson	Wald ratio	1	0.112	0.092	0.223455	1.119	0.934	1.34	intron_variant	MODIFIER	GFRA1	protein_coding	-	-	0.437	-0.23154
PSAPL1.8814.33.3	rs10023470		Sun	Wald ratio	1	0.07	0.057	0.223508	1.072	0.958	1.199	3_prime_UTR_variant	MODIFIER	PSAPL1	protein_coding	-	-	4.409	0.310331
ULBP3	rs17054300		Emilsson	Wald ratio	1	0.201	0.165	0.223866	1.222	0.885	1.688	intergenic_variant	MODIFIER	-	-	-	-	0.419	-0.239966
F11	rs2289252		Suhre	Wald ratio	1	-0.0676	0.0557	0.224196	0.9346	0.838	1.0423	intron_variant	MODIFIER	F11	protein_coding	-	-	0.041	-0.713127
IGFBP3.2571.12.3	rs145188037		Sun	Wald ratio	1	0.122	0.1	0.224929	1.129	0.928	1.374	missense_variant	MODERATE	IGFBP3	protein_coding	tolerated(0.06)	benign(0.11)	20.8	2.1914
CPA4	rs729167		Emilsson	Wald ratio	1	-0.031	0.026	0.226234	0.969	0.921	1.02	intron_variant	MODIFIER	CPA4	protein_coding	-	-	6.436	0.493488
IL5RA	rs6800335		Emilsson	Wald ratio	1	0.104	0.086	0.226615	1.11	0.938	1.313	intron_variant	MODIFIER	IL5RA	protein_coding	-	-	0.1	-0.535312
CCL14	rs7222922		Emilsson	Wald ratio	1	-0.048	0.04	0.226619	0.953	0.882	1.03	downstream_gene_variant	MODIFIER	CCL23	protein_coding	-	-	10.81	0.933829
RET	rs2505535		Emilsson	Wald ratio	1	0.079	0.066	0.227863	1.082	0.952	1.231	intron_variant	MODIFIER	RET	protein_coding	-	-	2.272	0.119614
RET	rs2505535		Suhre	Wald ratio	1	0.0761	0.0631	0.227863	1.0791	0.9535	1.2212	intron_variant	MODIFIER	RET	protein_coding	-	-	2.272	0.119614
GPNMB.8289.8.3	rs10250602		Sun	Wald ratio	1	0.152	0.126	0.22791	1.164	0.909	1.489	intron_variant	MODIFIER	GPNMB	protein_coding	-	-	12.11	1.03961
PATE4.8065.245.3	rs875500		Sun	Wald ratio	1	0.063	0.053	0.230139	1.066	0.961	1.182	upstream_gene_variant	MODIFIER	PATE4	protein_coding	-	-	8.188	0.671152
MTHFS	rs35144922		Emilsson	Wald ratio	1	0.098	0.082	0.231608	1.103	0.939	1.297	upstream_gene_variant	MODIFIER	-	lncRNA	-	-	0.181	-0.412517
EPO	rs576236		Emilsson	Wald ratio	1	0.258	0.216	0.2332	1.294	0.847	1.976	upstream_gene_variant	MODIFIER	EPO	protein_coding	-	-	1.435	0.015435
LGALS3	rs76426991		Emilsson	Wald ratio	1	0.085	0.072	0.233558	1.089	0.946	1.253	intron_variant	MODIFIER	LGALS3	protein_coding	-	-	10.75	0.929296
CXCL1	rs3117602		Emilsson	Wald ratio	1	0.163	0.137	0.233894	1.178	0.9	1.541	upstream_gene_variant	MODIFIER	CXCL1	protein_coding	-	-	0.115	-0.507209
CAPN1 CAPNS1	rs10895987		Suhre	Wald ratio	1	-0.0708	0.0597	0.23557	0.9316	0.8288	1.0473	upstream_gene_variant	MODIFIER	SYVN1	protein_coding	-	-	7.838	0.633877
HSD17B14	rs473464		Emilsson	Wald ratio	1	-0.229	0.193	0.235735	0.795	0.545	1.161	intron_variant	MODIFIER	HSD17B14	protein_coding	-	-	1.709	0.053851
TRIL	rs11761932		Emilsson	Wald ratio	1	0.315	0.266	0.235988	1.37	0.814	2.308	intron_variant	MODIFIER	CPVL	protein_coding	-	-	2.104	0.101414
TCN1	rs150355695		Emilsson	Wald ratio	1	-0.108	0.092	0.237004	0.897	0.75	1.074	intergenic_variant	MODIFIER	-	-	-	-	1.837	0.070113
MMP9	rs3918249		Yao	Wald ratio	1	-0.169	0.143	0.237132	0.845	0.639	1.117	intron_variant	MODIFIER	MMP9	protein_coding	-	-	5.397	0.397295
ANGPTL1.11142.11.3	rs16853043		Sun	Wald ratio	1	-0.067	0.057	0.23787	0.935	0.837	1.045	regulatory_region_variant	MODIFIER	-	promoter_flanking_region	-	-	0.724	-0.128448
UXS1	rs12617748	rs17032659	Emilsson	Wald ratio	1	0.201	0.171	0.238341	1.223	0.875	1.709
DKK1.3535.84.1	rs1194673		Sun	Wald ratio	1	0.159	0.135	0.238453	1.172	0.9	1.527	intergenic_variant	MODIFIER	-	-	-	-	0.051	-0.669558
LILRB5.7015.8.3	rs12975366		Sun	Wald ratio	1	-0.029	0.024	0.239074	0.972	0.927	1.019	missense_variant	MODERATE	LILRB5	protein_coding	deleterious(0)	probably_damaging(0.988)
SPATA20.11117.2.3	rs9890200		Sun	Wald ratio	1	0.118	0.1	0.240704	1.125	0.924	1.369	downstream_gene_variant	MODIFIER	EPN3	protein_coding	-	-	10.89	0.941401
PSGL-1	rs11114010		Folkersen	Wald ratio	1	0.066	0.056	0.241583	1.068	0.957	1.192	intergenic_variant	MODIFIER	-	-	-	-	0.451	-0.225225
COL15A1.8974.172.3	rs41305481		Sun	Wald ratio	1	0.123	0.105	0.242819	1.131	0.92	1.389	intron_variant	MODIFIER	COL15A1	protein_coding	-	-	2.24	0.116175
IDUA	rs4690326		Emilsson	Wald ratio	1	0.045	0.039	0.24307	1.046	0.97	1.128	3_prime_UTR_variant	MODIFIER	DGKQ	protein_coding	-	-	2.566	0.149041
MAP2K2	rs148318314		Emilsson	Wald ratio	1	0.265	0.227	0.243266	1.304	0.835	2.036	intron_variant	MODIFIER	PIAS4	protein_coding	-	-	0.566	-0.179176
ANG	rs28535078		Emilsson	Wald ratio	1	-0.05	0.043	0.244269	0.951	0.874	1.035	upstream_gene_variant	MODIFIER	Y_RNA	misc_RNA	-	-	3.372	0.22152
TNFRSF11B	rs77914317		Emilsson	Wald ratio	1	-0.249	0.214	0.245041	0.78	0.513	1.186	intron_variant,non_coding_transcript_variant	MODIFIER	COLEC10	processed_transcript	-	-	0.521	-0.196122
FCN1.3613.62.5	rs11103602		Sun	Wald ratio	1	-0.053	0.046	0.245622	0.948	0.867	1.037	regulatory_region_variant	MODIFIER	-	promoter_flanking_region	-	-	4.091	0.28299
FCGR2B	rs72633697		Emilsson	Wald ratio	1	0.031	0.027	0.246239	1.031	0.979	1.087	upstream_gene_variant	MODIFIER	RPL31P11	transcribed_processed_pseudogene	-	-	1.677	0.049633
C11orf68	rs79653698		Emilsson	Wald ratio	1	0.222	0.192	0.246383	1.249	0.858	1.819	upstream_gene_variant	MODIFIER	-	processed_pseudogene	-	-	3.066	0.194909
CSF1R	rs216140		Emilsson	Wald ratio	1	0.239	0.206	0.246491	1.27	0.848	1.904	intron_variant	MODIFIER	CSF1R	protein_coding	-	-	0.023	-0.81597
HS6ST1.5465.32.3	rs34827544		Sun	Wald ratio	1	-0.126	0.109	0.247617	0.881	0.711	1.092	intergenic_variant	MODIFIER	-	-	-	-	0.734	-0.125546
GSKIP	rs76581717		Emilsson	Wald ratio	1	-0.326	0.283	0.247988	0.721	0.415	1.255	intron_variant	MODIFIER	BDKRB2	protein_coding	-	-	0.544	-0.187301
PLXNB2.9216.100.3	rs28573806		Sun	Wald ratio	1	0.056	0.049	0.248075	1.058	0.962	1.163	intron_variant	MODIFIER	PLXNB2	protein_coding	-	-	2.226	0.114683
CCL25.2705.5.2	rs74959615		Sun	Wald ratio	1	0.055	0.048	0.248428	1.057	0.962	1.161	missense_variant	MODERATE	CCL25	protein_coding	tolerated(0.63)	benign(0.005)	0.002	-1.19181
NPTX1	rs62067239		Emilsson	Wald ratio	1	-0.154	0.134	0.248489	0.857	0.66	1.114	intergenic_variant	MODIFIER	-	-	-	-	2.142	0.105596
CHI3L1	rs903357		Emilsson	Wald ratio	1	-0.03	0.026	0.249976	0.97	0.921	1.022	upstream_gene_variant	MODIFIER	MYBPH	protein_coding	-	-	0.175	-0.419488
SERPINE2	rs68066031		Emilsson	Wald ratio	1	-0.033	0.029	0.251274	0.968	0.915	1.024	intron_variant	MODIFIER	SERPINE2	protein_coding	-	-	0.045	-0.695461
POMGNT2.6359.50.3	rs729654		Sun	Wald ratio	1	0.105	0.092	0.252596	1.111	0.928	1.331	upstream_gene_variant	MODIFIER	POMGNT2	protein_coding	-	-	3.793	0.257614
POMGNT2	rs729654		Emilsson	Wald ratio	1	0.099	0.086	0.252596	1.104	0.932	1.307	upstream_gene_variant	MODIFIER	POMGNT2	protein_coding	-	-	3.793	0.257614
IGFBPL1	rs10973757		Emilsson	Wald ratio	1	0.249	0.217	0.252624	1.282	0.837	1.964	regulatory_region_variant	MODIFIER	-	promoter_flanking_region	-	-	1.04	-0.052638
MPP7	rs2797593		Emilsson	Wald ratio	1	-0.245	0.215	0.254928	0.783	0.514	1.193	intergenic_variant	MODIFIER	-	-	-	-	0.808	-0.105518
LTF.2780.35.2	rs6441996		Sun	Wald ratio	1	-0.073	0.065	0.255668	0.929	0.819	1.055	intron_variant	MODIFIER	LTF	protein_coding	-	-	3.343	0.219036
FAH.11424.4.3	rs11555096		Sun	Wald ratio	1	-0.052	0.046	0.255871	0.949	0.868	1.038	missense_variant	MODERATE	FAH	protein_coding	deleterious(0)	probably_damaging(0.964)	24.8	3.51799
FAH	rs11555096		Emilsson	Wald ratio	1	-0.064	0.057	0.255871	0.938	0.839	1.048	missense_variant	MODERATE	FAH	protein_coding	deleterious(0)	probably_damaging(0.964)	24.8	3.51799
LMAN2	rs28419182		Emilsson	Wald ratio	1	-0.26	0.23	0.257074	0.771	0.491	1.209	3_prime_UTR_variant	MODIFIER	RAB24	protein_coding	-	-	4.66	0.332079
LYVE1	rs114527818		Emilsson	Wald ratio	1	-0.184	0.162	0.257682	0.832	0.605	1.144	intron_variant	MODIFIER	IRAG1	protein_coding	-	-	0.536	-0.190388
KLK14	rs2569491		Emilsson	Wald ratio	1	-0.06	0.053	0.258019	0.942	0.848	1.045	missense_variant	MODERATE	KLK14	protein_coding	tolerated(1)	benign(0)	9.158	0.776148
VIT.6234.74.3	rs10490666		Sun	Wald ratio	1	0.085	0.075	0.258152	1.088	0.94	1.261	intron_variant	MODIFIER	VIT	protein_coding	-	-	16.87	1.67653
VIT	rs10490666		Emilsson	Wald ratio	1	0.13	0.115	0.258152	1.138	0.909	1.425	intron_variant	MODIFIER	VIT	protein_coding	-	-	16.87	1.67653
FAM3B.9177.6.3	rs73226194		Sun	Wald ratio	1	-0.064	0.057	0.260427	0.938	0.839	1.049	intron_variant	MODIFIER	FAM3B	protein_coding	-	-	7.241	0.572316
CXCL1.2985.35.1	rs2115691		Sun	Wald ratio	1	0.088	0.078	0.260484	1.092	0.937	1.274	intergenic_variant	MODIFIER	-	-	-	-	2.496	0.142295
CXCL10	rs11548618		Suhre	Wald ratio	1	0.0922	0.082	0.260484	1.0966	0.9339	1.2877	missense_variant	MODERATE	CXCL10	protein_coding	deleterious(0)	benign(0.201)	23.1	2.84226
CST1	rs6114248		Suhre	Wald ratio	1	-0.0512	0.0456	0.260795	0.95	0.8689	1.0388	intron_variant,non_coding_transcript_variant	MODIFIER	-	lncRNA	-	-	2.201	0.112055
CST2	rs6114248		Suhre	Wald ratio	1	-0.0561	0.0499	0.260795	0.9454	0.8573	1.0426	intron_variant,non_coding_transcript_variant	MODIFIER	-	lncRNA	-	-	2.201	0.112055
RNASE4	rs1888560		Emilsson	Wald ratio	1	-0.137	0.122	0.26215	0.872	0.687	1.108	intron_variant	MODIFIER	RNASE4	protein_coding	-	-	1.645	0.045267
SERPINA10	rs941591		Emilsson	Wald ratio	1	0.039	0.035	0.262443	1.04	0.971	1.113	missense_variant	MODERATE	SERPINA10	protein_coding	tolerated(0.06)	benign(0.014)	0.008	-0.982297
ECH1	rs4802890		Emilsson	Wald ratio	1	0.081	0.073	0.263199	1.085	0.941	1.251	upstream_gene_variant	MODIFIER	LGALS4	protein_coding	-	-	0.788	-0.110629
NME2	rs12952884		Emilsson	Wald ratio	1	-0.096	0.086	0.264137	0.908	0.767	1.075	upstream_gene_variant	MODIFIER	NME1	protein_coding	-	-	2.925	0.182391
C10orf54.14123.34.3	rs10762477	rs41281328	Sun	Wald ratio	1	0.131	0.118	0.264271	1.14	0.906	1.436
IL1RL1	rs11676124		Emilsson	Wald ratio	1	-0.044	0.039	0.26455	0.957	0.886	1.034	intron_variant	MODIFIER	IL1RL1	protein_coding	-	-	3.453	0.228551
FH	rs12071124		Emilsson	Wald ratio	1	0.263	0.236	0.264747	1.301	0.819	2.066	upstream_gene_variant	MODIFIER	FH	protein_coding	-	-	0.923	-0.077543
COL18A1	rs2274809		Yao	Wald ratio	1	-0.169	0.152	0.264816	0.844	0.627	1.137	intron_variant	MODIFIER	COL18A1	protein_coding	-	-	0.024	-0.808368
AGP1	rs2787337		Yao	Wald ratio	1	-0.214	0.192	0.264875	0.807	0.554	1.176	upstream_gene_variant	MODIFIER	ORM1	protein_coding	-	-	1.412	0.011965
MMP-1	rs471994		Folkersen	Wald ratio	1	-0.076	0.068	0.265157	0.927	0.811	1.059	upstream_gene_variant	MODIFIER	WTAPP1	transcribed_processed_pseudogene	-	-	2.451	0.137802
MMP1	rs471994		Emilsson	Wald ratio	1	-0.049	0.044	0.265157	0.952	0.873	1.038	upstream_gene_variant	MODIFIER	WTAPP1	transcribed_processed_pseudogene	-	-	2.451	0.137802
Resistin	rs732457		Yao	Wald ratio	1	-0.21	0.189	0.265792	0.811	0.56	1.173	intron_variant	MODIFIER	XAB2	protein_coding	-	-	0.079	-0.584135
TREML2	rs13207171		Emilsson	Wald ratio	1	-0.037	0.033	0.266387	0.964	0.904	1.028	intron_variant	MODIFIER	TREML2	protein_coding	-	-	8.942	0.753189
HAVCR2	rs4704846		Suhre	Wald ratio	1	0.0483	0.0435	0.266841	1.0495	0.9637	1.143	3_prime_UTR_variant	MODIFIER	HAVCR2	protein_coding	-	-	0.833	-0.099143
WISP2	rs1061098		Emilsson	Wald ratio	1	0.13	0.117	0.267862	1.139	0.905	1.433	3_prime_UTR_variant	MODIFIER	CCN5	protein_coding	-	-	6.536	0.50301
ADM	rs2218793		Yao	Wald ratio	1	0.264	0.239	0.267995	1.302	0.816	2.079	intron_variant,non_coding_transcript_variant	MODIFIER	AMPD3	processed_transcript	-	-	7.202	0.568346
F11	rs4253417		Emilsson	Wald ratio	1	-0.069	0.063	0.268485	0.933	0.825	1.055	intron_variant	MODIFIER	F11	protein_coding	-	-	3.392	0.22326
HSP_27	rs2868371		Folkersen	Wald ratio	1	0.092	0.083	0.268723	1.096	0.931	1.291	upstream_gene_variant	MODIFIER	HSPB1	protein_coding	-	-	1.546	0.031671
HSPB1	rs2868371		Emilsson	Wald ratio	1	0.127	0.115	0.268723	1.135	0.907	1.421	upstream_gene_variant	MODIFIER	HSPB1	protein_coding	-	-	1.546	0.031671
MANBA	rs223489		Emilsson	Wald ratio	1	-0.061	0.055	0.269046	0.941	0.844	1.048	intron_variant	MODIFIER	MANBA	protein_coding	-	-	14.24	1.27949
SLAMF7	rs489286		Suhre	Wald ratio	1	0.0397	0.0359	0.269229	1.0404	0.9698	1.1163	intron_variant	MODIFIER	SLAMF7	protein_coding	-	-	0.42	-0.239388
HAVCR2	rs4704737		Emilsson	Wald ratio	1	0.05	0.045	0.269732	1.051	0.962	1.149	intron_variant	MODIFIER	HAVCR2	protein_coding	-	-	1.497	0.024671
ST2	rs13020553		Folkersen	Wald ratio	1	-0.041	0.037	0.271332	0.96	0.893	1.032	intron_variant	MODIFIER	IL1RL1	protein_coding	-	-	0.817	-0.103049
AFM	rs41265665		Suhre	Wald ratio	1	0.1042	0.0949	0.272292	1.1098	0.9214	1.3367	missense_variant	MODERATE	AFM	protein_coding	tolerated(0.25)	benign(0.007)	2.409	0.133604
SIGLEC9	rs2691273		Suhre	Wald ratio	1	0.0357	0.0326	0.27291	1.0364	0.9722	1.1047	downstream_gene_variant	MODIFIER	CTU1	protein_coding	-	-	1.542	0.031037
LPO	rs62083740	rs8178290	Emilsson	Wald ratio	1	-0.109	0.1	0.274065	0.896	0.737	1.09
NPTXR	rs12628473		Emilsson	Wald ratio	1	-0.098	0.089	0.274338	0.907	0.761	1.08	upstream_gene_variant	MODIFIER	NPTXR	protein_coding	-	-	6.89	0.537387
OXT	rs877172		Emilsson	Wald ratio	1	-0.046	0.042	0.276445	0.955	0.879	1.038	upstream_gene_variant	MODIFIER	OXT	protein_coding	-	-	3.423	0.225952
CSGALNACT2	rs2435378		Emilsson	Wald ratio	1	-0.069	0.064	0.276689	0.933	0.823	1.057	downstream_gene_variant	MODIFIER	CSGALNACT2	protein_coding	-	-	4.277	0.299013
ACP5.3232.28.2	rs79061565		Sun	Wald ratio	1	-0.085	0.078	0.277005	0.918	0.788	1.071	downstream_gene_variant	MODIFIER	GAPDHP76	unprocessed_pseudogene	-	-	1.786	0.063757
ADM	rs2923098		Emilsson	Wald ratio	1	-0.238	0.219	0.278193	0.788	0.513	1.212	intron_variant,non_coding_transcript_variant	MODIFIER	AMPD3	processed_transcript	-	-	3.277	0.213397
SLITRK5	rs7333224		Emilsson	Wald ratio	1	0.275	0.254	0.27983	1.317	0.8	2.168	upstream_gene_variant	MODIFIER	-	processed_pseudogene	-	-	0.719	-0.129872
CKM.2670.67.4	rs11559024		Sun	Wald ratio	1	-0.142	0.132	0.280441	0.867	0.67	1.123	missense_variant	MODERATE	CKM	protein_coding	deleterious(0.01)	benign(0.368)	17	1.69589
DBNL	rs3087367		Emilsson	Wald ratio	1	0.124	0.115	0.281375	1.132	0.903	1.42	intron_variant	MODIFIER	POLD2	protein_coding	-	-	0.332	-0.287043
RSPO3	rs3734626		Emilsson	Wald ratio	1	0.077	0.072	0.283288	1.08	0.938	1.243	intron_variant	MODIFIER	RSPO3	protein_coding	-	-	0.304	-0.30509
PGD	rs41289075		Emilsson	Wald ratio	1	-0.262	0.244	0.283656	0.77	0.477	1.242	missense_variant	MODERATE	PGD	protein_coding	tolerated(0.09)	benign(0.013)	22.5	2.53092
GNMT	rs9471987		Emilsson	Wald ratio	1	0.063	0.059	0.283705	1.065	0.949	1.196	intron_variant	MODIFIER	PEX6	protein_coding	-	-	1.099	-0.041088
SIGLEC7.2742.68.2	rs140185670		Sun	Wald ratio	1	-0.09	0.084	0.283727	0.913	0.774	1.078	intron_variant	MODIFIER	SIGLEC7	protein_coding	-	-	1.311	-0.003891
LILRB1	rs2004318		Suhre	Wald ratio	1	-0.0327	0.0305	0.283977	0.9678	0.9116	1.0275	upstream_gene_variant	MODIFIER	LILRB1	protein_coding	-	-	1.333	-0.000354
GPNMB.8606.39.3	rs2268748		Sun	Wald ratio	1	0.089	0.083	0.285385	1.093	0.929	1.286	synonymous_variant	LOW	GPNMB	protein_coding	-	-	4.93	0.355781
UCMA.10977.55.3	rs2093847		Sun	Wald ratio	1	-0.075	0.071	0.285686	0.927	0.808	1.065	upstream_gene_variant	MODIFIER	UCMA	protein_coding	-	-	4.846	0.348335
SERPINA10	rs1950843		Yao	Wald ratio	1	0.045	0.042	0.285996	1.046	0.963	1.135	upstream_gene_variant	MODIFIER	IFI27L2	protein_coding	-	-	1.141	-0.033202
SWAP70	rs360155		Emilsson	Wald ratio	1	0.087	0.081	0.286247	1.09	0.93	1.278	intron_variant	MODIFIER	SWAP70	protein_coding	-	-	1.781	0.063081
DKK3	rs11022119		Suhre	Wald ratio	1	-0.0842	0.0791	0.286815	0.9192	0.7872	1.0733	upstream_gene_variant	MODIFIER	LINC02547	lncRNA	-	-	2.039	0.094184
COX6A1	rs66840048	rs16950305	Emilsson	Wald ratio	1	0.226	0.213	0.286869	1.254	0.827	1.902
FCN1	rs11103604		Emilsson	Wald ratio	1	-0.061	0.057	0.28928	0.941	0.842	1.053	regulatory_region_variant	MODIFIER	-	promoter_flanking_region	-	-	0.212	-0.379438
MMP9	rs6094239		Emilsson	Wald ratio	1	0.129	0.122	0.290333	1.138	0.895	1.447	upstream_gene_variant	MODIFIER	SLC12A5	protein_coding	-	-	1.336	5.5e-05
C10orf54	rs10999992		Emilsson	Wald ratio	1	-0.138	0.131	0.290641	0.871	0.674	1.125	intron_variant	MODIFIER	VSIR	protein_coding	-	-	6.534	0.502876
COL23A1	rs2546644		Emilsson	Wald ratio	1	-0.216	0.206	0.293062	0.805	0.538	1.206	intron_variant	MODIFIER	COL23A1	protein_coding	-	-	0.03	-0.768421
CA1	rs2453868		Emilsson	Wald ratio	1	-0.169	0.161	0.293427	0.844	0.615	1.158	intron_variant	MODIFIER	CA3	protein_coding	-	-	5.976	0.45022
FAM177A1	rs799498		Emilsson	Wald ratio	1	0.051	0.049	0.293932	1.053	0.957	1.158	intron_variant	MODIFIER	SRP54	protein_coding	-	-	8.947	0.753712
FBP1	rs28382867		Emilsson	Wald ratio	1	0.175	0.167	0.294042	1.192	0.859	1.653	intron_variant	MODIFIER	FBP1	protein_coding	-	-	3.398	0.22383
NPTX2	rs817765		Emilsson	Wald ratio	1	0.253	0.242	0.29455	1.288	0.802	2.069	intergenic_variant	MODIFIER	-	-	-	-	0.535	-0.190498
EMR2	rs7260110		Suhre	Wald ratio	1	0.0923	0.0882	0.295653	1.0966	0.9225	1.3036	intron_variant	MODIFIER	ADGRE5	protein_coding	-	-	7.78	0.627749
CD209	rs8106657		Suhre	Wald ratio	1	-0.0829	0.0793	0.295886	0.9205	0.788	1.0752	regulatory_region_variant	MODIFIER	-	open_chromatin_region	-	-	1.478	0.02184
COLEC12	rs12957470		Emilsson	Wald ratio	1	0.179	0.171	0.295892	1.196	0.855	1.672	upstream_gene_variant	MODIFIER	RN7SKP146	misc_RNA	-	-	0.618	-0.161212
LCP1	rs11618432		Emilsson	Wald ratio	1	0.194	0.186	0.297225	1.214	0.843	1.749	intron_variant,non_coding_transcript_variant	MODIFIER	CPB2-AS1	lncRNA	-	-	0.237	-0.356304
XCL1	rs76400946		Emilsson	Wald ratio	1	-0.212	0.204	0.29943	0.809	0.542	1.207	intron_variant	MODIFIER	XCL2	protein_coding	-	-	0.198	-0.394074
MANEA.8014.359.3	rs80268500	rs13206900	Sun	Wald ratio	1	-0.026	0.025	0.299434	0.974	0.927	1.024
PSG9	rs28836541		Emilsson	Wald ratio	1	-0.193	0.186	0.299543	0.824	0.572	1.187	intergenic_variant	MODIFIER	-	-	-	-	0.354	-0.274018
MSMB	rs11006489		Emilsson	Wald ratio	1	0.03	0.029	0.299647	1.03	0.974	1.09	upstream_gene_variant	MODIFIER	MSMB	protein_coding	-	-	0.81	-0.105005
C1RL.9348.1.3	rs191448232		Sun	Wald ratio	1	0.065	0.063	0.301564	1.067	0.943	1.208	splice_region_variant,intron_variant	LOW	C1RL	protein_coding	-	-	14.47	1.31153
SHANK3	rs6010042		Emilsson	Wald ratio	1	0.091	0.088	0.302474	1.095	0.921	1.303	intergenic_variant	MODIFIER	-	-	-	-	4.67	0.332945
CCL16	rs10445391		Emilsson	Wald ratio	1	0.03	0.029	0.304408	1.03	0.973	1.091	intron_variant	MODIFIER	CCL16	protein_coding	-	-	3.106	0.198493
PTHLH.2962.50.2	rs10843115		Sun	Wald ratio	1	0.143	0.14	0.304457	1.154	0.878	1.518	intron_variant	MODIFIER	CCDC91	protein_coding	-	-	0.438	-0.230823
LYZ	rs7959452		Suhre	Wald ratio	1	0.0358	0.0349	0.305061	1.0364	0.9679	1.1097	intergenic_variant	MODIFIER	-	-	-	-	0.042	-0.70792
RSPO4	rs6056847		Emilsson	Wald ratio	1	-0.142	0.139	0.305314	0.867	0.66	1.139	intron_variant,non_coding_transcript_variant	MODIFIER	-	lncRNA	-	-	4.067	0.280992
MPL	rs4660731		Emilsson	Wald ratio	1	-0.227	0.222	0.305557	0.797	0.516	1.231	downstream_gene_variant	MODIFIER	TIE1	protein_coding	-	-	0.72	-0.129564
CNTNAP2.6965.19.3	rs10274393		Sun	Wald ratio	1	0.061	0.06	0.306229	1.063	0.946	1.195	upstream_gene_variant	MODIFIER	-	lncRNA	-	-	0.227	-0.365879
MCL1	rs190596489		Emilsson	Wald ratio	1	0.131	0.128	0.306264	1.14	0.887	1.465	intergenic_variant	MODIFIER	-	-	-	-	1.47	0.020609
CNTFR	rs1571401		Emilsson	Wald ratio	1	0.131	0.129	0.307822	1.14	0.886	1.467	intron_variant	MODIFIER	CNTFR	protein_coding	-	-	4.324	0.302986
SIRT2	rs144373891		Folkersen	Wald ratio	1	-0.214	0.21	0.307884	0.807	0.534	1.219	missense_variant	MODERATE	SIRT2	protein_coding	deleterious(0.03)	possibly_damaging(0.579)	26	3.83327
CAPN2.14684.17.3	rs373214284		Sun	Wald ratio	1	0.24	0.236	0.309301	1.271	0.801	2.018	intron_variant	MODIFIER	CAPN2	protein_coding	-	-	11.93	1.02489
CPQ	rs145746079		Emilsson	Wald ratio	1	-0.072	0.071	0.311052	0.931	0.81	1.07	intron_variant	MODIFIER	CPQ	protein_coding	-	-	4.327	0.303283
MTHFD1	rs113243087		Emilsson	Wald ratio	1	0.227	0.224	0.311172	1.254	0.809	1.945	intron_variant,non_coding_transcript_variant	MODIFIER	TEX21P	transcribed_unitary_pseudogene	-	-	0.841	-0.097147
OLA1	rs77345174		Emilsson	Wald ratio	1	-0.119	0.117	0.31233	0.888	0.706	1.118	intron_variant	MODIFIER	OLA1	protein_coding	-	-	3.849	0.262342
GUCA2B	rs11210601		Emilsson	Wald ratio	1	0.226	0.223	0.31285	1.253	0.809	1.942	regulatory_region_variant	MODIFIER	-	CTCF_binding_site	-	-	0.042	-0.709518
RPS27A	rs2917775		Emilsson	Wald ratio	1	0.227	0.225	0.313294	1.255	0.807	1.952	intron_variant	MODIFIER	CCDC88A	protein_coding	-	-	1.671	0.048872
CRK	rs8079811		Emilsson	Wald ratio	1	-0.258	0.256	0.313616	0.773	0.468	1.276	intron_variant	MODIFIER	MYO1C	protein_coding	-	-	0.06	-0.639267
CSF-1	rs11579145		Folkersen	Wald ratio	1	0.132	0.131	0.315264	1.141	0.882	1.475	intergenic_variant	MODIFIER	-	-	-	-	5.215	0.381021
CNTN4	rs2729284		Emilsson	Wald ratio	1	-0.163	0.162	0.315416	0.85	0.618	1.168	upstream_gene_variant	MODIFIER	CNTN4	protein_coding	-	-	2.495	0.142173
PDCD1LG2.3004.67.2	rs16923189		Sun	Wald ratio	1	0.067	0.067	0.317311	1.069	0.938	1.218	5_prime_UTR_variant	MODIFIER	PDCD1LG2	protein_coding	-	-	6.664	0.515346
PDCD1LG2	rs16923189		Emilsson	Wald ratio	1	0.056	0.056	0.317311	1.058	0.947	1.181	5_prime_UTR_variant	MODIFIER	PDCD1LG2	protein_coding	-	-	6.664	0.515346
PDCD1LG2	rs16923189		Suhre	Wald ratio	1	0.0492	0.0492	0.317311	1.0505	0.9538	1.1569	5_prime_UTR_variant	MODIFIER	PDCD1LG2	protein_coding	-	-	6.664	0.515346
SERPINA5	rs8009930		Emilsson	Wald ratio	1	-0.182	0.182	0.318703	0.834	0.583	1.192	intron_variant	MODIFIER	SERPINA5	protein_coding	-	-	0.789	-0.110548
NTM	rs2511504		Emilsson	Wald ratio	1	0.062	0.062	0.321412	1.064	0.942	1.202	intron_variant,non_coding_transcript_variant	MODIFIER	-	lncRNA	-	-	3.494	0.231996
FTCD	rs149024257		Emilsson	Wald ratio	1	0.23	0.232	0.321683	1.259	0.798	1.985	intron_variant	MODIFIER	MCM3AP	protein_coding	-	-	1.634	0.043791
KLK13	rs3760739		Emilsson	Wald ratio	1	-0.066	0.067	0.322927	0.936	0.821	1.067	upstream_gene_variant	MODIFIER	KLK12	protein_coding	-	-	21.7	2.32699
ADAM22	rs6966166		Emilsson	Wald ratio	1	-0.133	0.135	0.323423	0.875	0.672	1.14	intron_variant	MODIFIER	RUNDC3B	protein_coding	-	-	1.788	0.063982
F7	rs488703		Emilsson	Wald ratio	1	0.039	0.039	0.324126	1.04	0.962	1.123	intron_variant	MODIFIER	F7	protein_coding	-	-	2.788	0.169952
ASIP	rs62212171		Emilsson	Wald ratio	1	0.042	0.042	0.324396	1.043	0.96	1.133	intron_variant	MODIFIER	ITCH	protein_coding	-	-	1.32	-0.002498
LTF	rs1126477		Emilsson	Wald ratio	1	-0.054	0.054	0.324401	0.948	0.852	1.055	missense_variant	MODERATE	LTF	protein_coding	tolerated(1)	benign(0.005)	0.003	-1.14217
FUT3	rs708686		Emilsson	Wald ratio	1	-0.041	0.042	0.324427	0.96	0.884	1.041	downstream_gene_variant	MODIFIER	FUT3	protein_coding	-	-	2.264	0.118708
NT-pro_BNP	rs198389		Folkersen	Wald ratio	1	-0.117	0.119	0.325116	0.889	0.704	1.123	upstream_gene_variant	MODIFIER	NPPB	protein_coding	-	-	0.194	-0.398274
STC1	rs4872190		Emilsson	Wald ratio	1	-0.268	0.274	0.326956	0.765	0.447	1.308	intron_variant,non_coding_transcript_variant	MODIFIER	-	lncRNA	-	-	0.647	-0.151824
ACP1.3858.5.1	rs79716074		Sun	Wald ratio	1	0.021	0.021	0.327247	1.021	0.979	1.064	downstream_gene_variant	MODIFIER	ALKAL2	protein_coding	-	-	20.9	2.20013
FGG	rs12511469		Emilsson	Wald ratio	1	-0.224	0.229	0.327253	0.799	0.511	1.251	downstream_gene_variant	MODIFIER	PLRG1	protein_coding	-	-	1.509	0.026311
ACP1	rs11553746		Suhre	Wald ratio	1	0.0194	0.0198	0.327288	1.0196	0.9808	1.0599	intron_variant	MODIFIER	ACP1	protein_coding	-	-	14.7	1.34468
QPCT	rs13027919		Emilsson	Wald ratio	1	0.086	0.088	0.327584	1.09	0.917	1.294	upstream_gene_variant	MODIFIER	QPCT	protein_coding	-	-	4.068	0.281092
APOB	rs520354		Suhre	Wald ratio	1	0.0762	0.0779	0.327672	1.0792	0.9264	1.2572	intron_variant	MODIFIER	APOB	protein_coding	-	-	3.742	0.253208
AGRP	rs138539707		Folkersen	Wald ratio	1	-0.34	0.347	0.32773	0.712	0.361	1.406	intron_variant	MODIFIER	TANGO6	protein_coding	-	-	0.476	-0.214334
CBL	rs77751615		Emilsson	Wald ratio	1	-0.188	0.192	0.328585	0.829	0.569	1.208	intron_variant	MODIFIER	C2CD2L	protein_coding	-	-	0.018	-0.854982
SIGLEC7	rs2691254		Emilsson	Wald ratio	1	0.151	0.154	0.329509	1.163	0.859	1.574	intron_variant	MODIFIER	CTU1	protein_coding	-	-	0.593	-0.169573
IGFBP6	rs10876402		Emilsson	Wald ratio	1	-0.247	0.254	0.329605	0.781	0.475	1.284	intron_variant	MODIFIER	SPRYD3	protein_coding	-	-	5.5	0.406632
C1QL1	rs9915692		Emilsson	Wald ratio	1	-0.083	0.085	0.329717	0.921	0.779	1.087	downstream_gene_variant	MODIFIER	C1QL1	protein_coding	-	-	0.241	-0.352904
ADM	rs4494298		Folkersen	Wald ratio	1	-0.159	0.164	0.330413	0.853	0.619	1.175	intron_variant,non_coding_transcript_variant	MODIFIER	AMPD3	processed_transcript	-	-	1.553	0.032673
GFRA1.3314.74.2	rs10885877		Sun	Wald ratio	1	0.094	0.097	0.330724	1.099	0.909	1.328	intron_variant	MODIFIER	GFRA1	protein_coding	-	-	9.616	0.822316
REG3G	rs429694		Emilsson	Wald ratio	1	0.057	0.059	0.33094	1.059	0.943	1.189	intergenic_variant	MODIFIER	-	-	-	-	3.522	0.234417
IL1RL2	rs1922291		Suhre	Wald ratio	1	0.0689	0.071	0.331511	1.0713	0.9322	1.2312	intron_variant	MODIFIER	IL1RL2	protein_coding	-	-	0.099	-0.53697
CD300A	rs2272111		Emilsson	Wald ratio	1	0.068	0.07	0.331753	1.071	0.933	1.229	missense_variant	MODERATE	CD300A	protein_coding	tolerated(0.72)	benign(0.015)	0.002	-1.23247
RPN1	rs7650934		Emilsson	Wald ratio	1	0.1	0.103	0.333304	1.105	0.903	1.352	downstream_gene_variant	MODIFIER	POU5F1P6	unprocessed_pseudogene	-	-	11.39	0.981429
STX8	rs60864581		Emilsson	Wald ratio	1	0.171	0.176	0.333408	1.186	0.839	1.675	intron_variant	MODIFIER	STX8	protein_coding	-	-	3.21	0.207514
TIE1	rs1209384		Emilsson	Wald ratio	1	-0.117	0.121	0.333642	0.89	0.703	1.127	upstream_gene_variant	MODIFIER	TIE1	protein_coding	-	-	0.004	-1.08216
CFHR1	rs57809726		Emilsson	Wald ratio	1	-0.025	0.025	0.333711	0.976	0.928	1.026	intron_variant,non_coding_transcript_variant	MODIFIER	-	unprocessed_pseudogene	-	-	1.61	0.040557
RSPO3.13094.75.3	rs2489623		Sun	Wald ratio	1	0.084	0.087	0.334138	1.087	0.917	1.289	intron_variant	MODIFIER	RSPO3	protein_coding	-	-	5.306	0.389125
RAB6B	rs9813363		Emilsson	Wald ratio	1	0.117	0.121	0.33485	1.124	0.886	1.425	intron_variant	MODIFIER	RAB6B	protein_coding	-	-	3.695	0.24917
EFNB3	rs8066124		Emilsson	Wald ratio	1	-0.223	0.232	0.335498	0.8	0.508	1.26	intron_variant	MODIFIER	DNAH2	protein_coding	-	-	1.136	-0.034047
FAM107A	rs4681693		Emilsson	Wald ratio	1	-0.208	0.216	0.335957	0.812	0.531	1.241	intron_variant	MODIFIER	FAM107A	protein_coding	-	-	3.575	0.23898
APOB	rs679899		Emilsson	Wald ratio	1	0.092	0.096	0.338251	1.096	0.908	1.323	missense_variant	MODERATE	APOB	protein_coding	tolerated(0.09)	probably_damaging(0.999)	24.8	3.53935
PCOLCE	rs4729597		Emilsson	Wald ratio	1	0.137	0.143	0.338467	1.146	0.867	1.517	intron_variant	MODIFIER	TFR2	protein_coding	-	-	1.917	0.079867
BTNL8	rs7721375		Emilsson	Wald ratio	1	0.089	0.093	0.338637	1.093	0.911	1.313	intergenic_variant	MODIFIER	-	-	-	-	3.953	0.271225
SELE	rs4656716		Folkersen	Wald ratio	1	-0.216	0.226	0.339162	0.805	0.517	1.255	downstream_gene_variant	MODIFIER	-	lncRNA	-	-	2.796	0.17064
GH1	rs58353137		Emilsson	Wald ratio	1	0.271	0.283	0.339515	1.311	0.752	2.284	intron_variant,non_coding_transcript_variant	MODIFIER	-	lncRNA	-	-	1.486	0.022971
YWHAB	rs2284265		Emilsson	Wald ratio	1	0.143	0.15	0.339808	1.154	0.86	1.548	intron_variant	MODIFIER	YWHAB	protein_coding	-	-	9.944	0.8542
ELANE	rs891206		Emilsson	Wald ratio	1	0.211	0.222	0.340728	1.235	0.8	1.908	intron_variant	MODIFIER	MED16	protein_coding	-	-
IGDCC4.9793.145.3	rs35223184		Sun	Wald ratio	1	-0.099	0.104	0.341873	0.906	0.739	1.11
GPNMB.5080.131.3	rs10262243		Sun	Wald ratio	1	0.102	0.108	0.342007	1.108	0.897	1.368	intron_variant	MODIFIER	GPNMB	protein_coding	-	-	1.315	-0.003268
GPNMB.8240.207.3	rs10262243		Sun	Wald ratio	1	0.109	0.115	0.342007	1.115	0.891	1.396	intron_variant	MODIFIER	GPNMB	protein_coding	-	-	1.315	-0.003268
LILRB1.5090.49.2	rs2114511		Sun	Wald ratio	1	-0.028	0.03	0.342112	0.972	0.917	1.031	synonymous_variant	LOW	LILRB1	protein_coding	-	-
OLFM2	rs56243392		Emilsson	Wald ratio	1	0.039	0.041	0.342203	1.04	0.959	1.128	intergenic_variant	MODIFIER	-	-	-	-	4.075	0.281673
NUDT9.9482.110.3	rs28696943		Sun	Wald ratio	1	-0.087	0.092	0.343123	0.917	0.766	1.097	intron_variant	MODIFIER	HSD17B11	protein_coding	-	-	2.224	0.114481
H6PD.7161.25.3	rs34603401		Sun	Wald ratio	1	0.041	0.043	0.344427	1.042	0.957	1.135	missense_variant	MODERATE	H6PD	protein_coding	deleterious(0.03)	benign(0.338)	26.2	3.87548
CAPG	rs143448563		Emilsson	Wald ratio	1	-0.07	0.074	0.344669	0.932	0.807	1.078	intron_variant	MODIFIER	ELMOD3	protein_coding	-	-	5.771	0.431274
ESD	rs947409		Suhre	Wald ratio	1	-0.0354	0.0375	0.3448	0.9652	0.8968	1.0388	intergenic_variant	MODIFIER	-	-	-	-	1.738	0.057554
CTRB2	rs7202566		Emilsson	Wald ratio	1	0.029	0.03	0.344943	1.029	0.97	1.093	intergenic_variant	MODIFIER	-	-	-	-	0.187	-0.405481
MAN1C1	rs3767879		Emilsson	Wald ratio	1	-0.134	0.142	0.345754	0.874	0.661	1.156	intron_variant	MODIFIER	MAN1C1	protein_coding	-	-	0.736	-0.125116
TMEM132A.7871.16.3	rs11230521		Sun	Wald ratio	1	0.042	0.045	0.346286	1.043	0.956	1.138	intron_variant	MODIFIER	TMEM132A	protein_coding	-	-	0.158	-0.440753
CD7	rs116473040		Emilsson	Wald ratio	1	0.06	0.064	0.349078	1.061	0.937	1.203	upstream_gene_variant	MODIFIER	SECTM1	protein_coding	-	-	6.997	0.547945
GPX7	rs1353079		Emilsson	Wald ratio	1	-0.23	0.246	0.349659	0.794	0.491	1.287	intron_variant	MODIFIER	TUT4	protein_coding	-	-	8.821	0.740049
ENPP7.4435.66.2	rs11871061		Sun	Wald ratio	1	0.025	0.027	0.349729	1.025	0.973	1.08	intron_variant	MODIFIER	ENPP7	protein_coding	-	-	0.782	-0.11241
KIAA1549L	rs12792396		Emilsson	Wald ratio	1	0.051	0.054	0.350937	1.052	0.946	1.17	intron_variant	MODIFIER	KIAA1549L	protein_coding	-	-	2.811	0.172058
SERPINF1.7735.17.3	rs62088172		Sun	Wald ratio	1	0.057	0.061	0.351836	1.058	0.939	1.193	intron_variant	MODIFIER	SERPINF1	protein_coding	-	-	4.482	0.316672
SERPINF1.9211.19.3	rs62088172		Sun	Wald ratio	1	0.055	0.059	0.351836	1.056	0.941	1.185	intron_variant	MODIFIER	SERPINF1	protein_coding	-	-	4.482	0.316672
RNASE6	rs2319516		Emilsson	Wald ratio	1	0.037	0.04	0.351901	1.038	0.959	1.123	upstream_gene_variant	MODIFIER	RNASE6	protein_coding	-	-	2.568	0.149253
RARRES1	rs73030851		Emilsson	Wald ratio	1	0.023	0.024	0.352324	1.023	0.975	1.073	intron_variant	MODIFIER	RARRES1	protein_coding	-	-	3.798	0.258034
CHRDL2.6086.15.3	rs11607100		Sun	Wald ratio	1	-0.083	0.089	0.353111	0.92	0.772	1.097	intron_variant	MODIFIER	CHRDL2	protein_coding	-	-	5.653	0.420524
REG4.11102.22.3	rs79795228		Sun	Wald ratio	1	-0.128	0.139	0.353785	0.879	0.67	1.154	TF_binding_site_variant	MODIFIER	-	-	-	-	8.892	0.747755
GZMK	rs11956997	rs7712338	Emilsson	Wald ratio	1	-0.183	0.198	0.35417	0.833	0.565	1.227
SPP1	rs1381949		Emilsson	Wald ratio	1	0.167	0.181	0.35546	1.182	0.829	1.685	intergenic_variant	MODIFIER	-	-	-	-	18.73	1.93124
CEL	rs45487303		Emilsson	Wald ratio	1	0.073	0.079	0.355611	1.076	0.921	1.256	synonymous_variant	LOW	-	protein_coding	-	-	7.365	0.584835
CYB5A	rs7239618		Emilsson	Wald ratio	1	-0.191	0.207	0.355814	0.826	0.55	1.24	intron_variant	MODIFIER	CYB5A	protein_coding	-	-	0.118	-0.501651
PRKCB	rs12919956		Emilsson	Wald ratio	1	-0.179	0.194	0.356536	0.836	0.571	1.224	intron_variant	MODIFIER	PRKCB	protein_coding	-	-	2.266	0.118957
BST1	rs12651314		Suhre	Wald ratio	1	-0.0312	0.0338	0.356789	0.9693	0.9071	1.0358	intergenic_variant	MODIFIER	-	-	-	-	2.065	0.097032
SOD3	rs2695234		Emilsson	Wald ratio	1	-0.057	0.062	0.357205	0.945	0.837	1.066	downstream_gene_variant	MODIFIER	SOD3	protein_coding	-	-	4.84	0.347855
IL1R1	rs7588201		Emilsson	Wald ratio	1	0.144	0.157	0.358635	1.155	0.849	1.571	intron_variant	MODIFIER	IL1R1	protein_coding	-	-	1.931	0.081528
FUT2	rs114518757		Emilsson	Wald ratio	1	-0.15	0.164	0.359026	0.861	0.624	1.186	upstream_gene_variant	MODIFIER	SULT2B1	protein_coding	-	-	6.651	0.514054
TNFAIP6	rs289828		Suhre	Wald ratio	1	-0.0559	0.061	0.359136	0.9456	0.839	1.0657	intron_variant	MODIFIER	NMI	protein_coding	-	-	6.592	0.508387
TNFAIP6.5036.50.1	rs289828		Sun	Wald ratio	1	-0.04	0.044	0.359136	0.96	0.881	1.047	intron_variant	MODIFIER	NMI	protein_coding	-	-	6.592	0.508387
RPN1.10490.3.3	rs2712417		Sun	Wald ratio	1	0.064	0.069	0.3595	1.066	0.93	1.221	intron_variant	MODIFIER	RPN1	protein_coding	-	-	0.179	-0.414785
CSGALNACT2.10772.21.3	rs2435349		Sun	Wald ratio	1	-0.122	0.134	0.359651	0.885	0.681	1.15	intron_variant	MODIFIER	CSGALNACT2	protein_coding	-	-	5.922	0.445207
SMPDL3A	rs28385609		Suhre	Wald ratio	1	-0.0588	0.0643	0.360084	0.9429	0.8312	1.0695	missense_variant	MODERATE	SMPDL3A	protein_coding	deleterious(0)	probably_damaging(1)	24.7	3.50613
SMPDL3A.14086.11.3	rs28385609		Sun	Wald ratio	1	-0.029	0.032	0.360084	0.971	0.913	1.034	missense_variant	MODERATE	SMPDL3A	protein_coding	deleterious(0)	probably_damaging(1)	24.7	3.50613
CTSH	rs7177831		Emilsson	Wald ratio	1	-0.033	0.036	0.361565	0.967	0.901	1.039	upstream_gene_variant	MODIFIER	CTSH	retained_intron	-	-	4.841	0.34798
MBL2	rs10824796		Suhre	Wald ratio	1	-0.0269	0.0295	0.362446	0.9735	0.9188	1.0314	upstream_gene_variant	MODIFIER	MBL2	protein_coding	-	-	0.137	-0.470115
ZG16	rs62054863		Emilsson	Wald ratio	1	-0.244	0.268	0.362839	0.784	0.463	1.325	intergenic_variant	MODIFIER	-	-	-	-	1.231	-0.017283
SERPINE1	rs4729660		Emilsson	Wald ratio	1	0.176	0.194	0.362909	1.193	0.816	1.743	intergenic_variant	MODIFIER	-	-	-	-	2.133	0.104631
CHI3L2	rs11556868		Emilsson	Wald ratio	1	0.1	0.11	0.364523	1.105	0.891	1.37	missense_variant	MODERATE	CHI3L2	protein_coding	deleterious(0.03)	possibly_damaging(0.897)	24.3	3.36701
GNPTG	rs4984820		Emilsson	Wald ratio	1	-0.113	0.125	0.364534	0.893	0.699	1.14	intron_variant	MODIFIER	GNPTG	protein_coding	-	-	3.928	0.269131
CCL8.2785.15.2	rs1133763		Sun	Wald ratio	1	0.126	0.139	0.364649	1.134	0.864	1.49	missense_variant	MODERATE	CCL8	protein_coding	deleterious(0.01)	possibly_damaging(0.588)	22.4	2.51286
SIGLEC12	rs1973095		Emilsson	Wald ratio	1	0.024	0.026	0.365018	1.024	0.973	1.078	intron_variant	MODIFIER	SIGLEC12	protein_coding	-	-	1.518	0.027648
GNRH2	rs12151862		Emilsson	Wald ratio	1	-0.182	0.201	0.365592	0.834	0.563	1.236	intron_variant	MODIFIER	PTPRA	protein_coding	-	-	1.379	0.00692
RNASE1	rs12885981		Emilsson	Wald ratio	1	0.099	0.11	0.36812	1.104	0.89	1.369	intergenic_variant	MODIFIER	-	-	-	-	4.891	0.352365
ASPH	rs2350578		Emilsson	Wald ratio	1	0.101	0.112	0.368334	1.106	0.888	1.378	regulatory_region_variant	MODIFIER	-	promoter_flanking_region	-	-	0.12	-0.497192
NOV.2737.22.2	rs58936256		Sun	Wald ratio	1	0.122	0.136	0.369438	1.13	0.866	1.474	intron_variant,non_coding_transcript_variant	MODIFIER	-	lncRNA	-	-	5.086	0.369555
GSTO1	rs1147611		Emilsson	Wald ratio	1	-0.036	0.04	0.369655	0.964	0.891	1.044	intron_variant	MODIFIER	GSTO1	protein_coding	-	-	2.816	0.172518
SHMT1	rs8067462		Emilsson	Wald ratio	1	0.073	0.081	0.369655	1.075	0.918	1.26	intron_variant	MODIFIER	SHMT1	protein_coding	-	-	1.136	-0.034188
TNFSF12	rs80067372		Emilsson	Wald ratio	1	-0.031	0.035	0.370928	0.969	0.905	1.038	intron_variant	MODIFIER	TNFSF12-TNFSF13	protein_coding	-	-	19.39	2.01761
FLRT3.13123.3.3	rs11908097		Sun	Wald ratio	1	0.055	0.061	0.371652	1.056	0.937	1.191	intron_variant	MODIFIER	MACROD2	protein_coding	-	-	7.734	0.622997
RBP4	rs36014035		Emilsson	Wald ratio	1	-0.159	0.178	0.371788	0.853	0.601	1.209	intron_variant	MODIFIER	RBP4	protein_coding	-	-	4.267	0.298106
MIF	rs4822452		Emilsson	Wald ratio	1	0.205	0.23	0.372331	1.227	0.783	1.924	intergenic_variant	MODIFIER	-	-	-	-	5.442	0.401397
POFUT1.5634.39.3	rs76143353		Sun	Wald ratio	1	-0.057	0.063	0.372651	0.945	0.835	1.07	intron_variant	MODIFIER	POFUT1	protein_coding	-	-	13.91	1.23572
PSAPL1	rs35791045		Emilsson	Wald ratio	1	0.052	0.059	0.374789	1.054	0.939	1.183	downstream_gene_variant	MODIFIER	PSAPL1	protein_coding	-	-	0.463	-0.219995
GPNMB	rs28458177		Emilsson	Wald ratio	1	0.08	0.091	0.376795	1.084	0.907	1.295	intron_variant	MODIFIER	GPNMB	protein_coding	-	-	1.366	0.004852
HDHD2.13472.35.3	rs75228657		Sun	Wald ratio	1	0.065	0.073	0.376969	1.067	0.924	1.232	intron_variant	MODIFIER	SKOR2	protein_coding	-	-	0.016	-0.881348
Dkk-1	rs7898709		Folkersen	Wald ratio	1	0.144	0.163	0.377416	1.155	0.839	1.59	intron_variant,non_coding_transcript_variant	MODIFIER	LNCAROD	lncRNA	-	-	4.781	0.342669
LAG3	rs3782735		Emilsson	Wald ratio	1	0.156	0.177	0.377586	1.169	0.827	1.652	downstream_gene_variant	MODIFIER	PTMS	protein_coding	-	-	19.73	2.06235
SIGLEC14.8248.222.3	rs1106476		Sun	Wald ratio	1	0.028	0.032	0.378174	1.028	0.966	1.095	intron_variant	MODIFIER	SIGLEC5	protein_coding	-	-	0.954	-0.070647
TF	rs11589759		Folkersen	Wald ratio	1	0.119	0.135	0.378503	1.126	0.864	1.467	intron_variant,non_coding_transcript_variant	MODIFIER	SLC44A3-AS1	processed_transcript	-	-	5.254	0.384529
RNASE6.5646.20.3	rs11622942		Sun	Wald ratio	1	0.025	0.028	0.37987	1.025	0.97	1.083	downstream_gene_variant	MODIFIER	RNASE6	protein_coding	-	-	4.437	0.312726
AHSG.3581.53.3	rs35094235		Sun	Wald ratio	1	0.038	0.043	0.380064	1.039	0.954	1.13	upstream_gene_variant	MODIFIER	AHSG	protein_coding	-	-	1.355	0.003165
ACP1	rs58461606	rs56321614	Emilsson	Wald ratio	1	0.019	0.022	0.380187	1.019	0.977	1.063
FGG	rs72679193		Yao	Wald ratio	1	-0.156	0.178	0.380668	0.856	0.604	1.212	intron_variant	MODIFIER	PLRG1	protein_coding	-	-	8.766	0.734037
ARL3	rs11191379		Emilsson	Wald ratio	1	0.102	0.117	0.381896	1.107	0.881	1.392	intron_variant	MODIFIER	SFXN2	protein_coding	-	-	1.322	-0.002198
THBS2.3339.33.1	rs73043857		Sun	Wald ratio	1	-0.043	0.05	0.38259	0.958	0.869	1.056	intron_variant	MODIFIER	THBS2	protein_coding	-	-	0.205	-0.386545
IL1R2	rs7561460		Emilsson	Wald ratio	1	-0.054	0.062	0.384438	0.947	0.838	1.07	intron_variant	MODIFIER	IL1R2	protein_coding	-	-	1.486	0.023012
CRTAM	rs2370794		Emilsson	Wald ratio	1	-0.092	0.106	0.385394	0.912	0.741	1.123	intron_variant	MODIFIER	CRTAM	protein_coding	-	-	0.664	-0.146437
THBS2	rs3763267		Suhre	Wald ratio	1	-0.0555	0.0641	0.386313	0.946	0.8343	1.0726	downstream_gene_variant	MODIFIER	LINC02544	lncRNA	-	-	3.028	0.191611
NOV	rs17791208		Emilsson	Wald ratio	1	0.103	0.119	0.386641	1.108	0.878	1.399	intron_variant	MODIFIER	CCN3	protein_coding	-	-	3.198	0.206472
CXCL11.3038.9.2	rs10031452	rs17288671	Sun	Wald ratio	1	-0.087	0.101	0.387681	0.916	0.752	1.117
DECR1	rs10956431		Emilsson	Wald ratio	1	0.183	0.212	0.38769	1.201	0.792	1.822	intron_variant	MODIFIER	DECR1	protein_coding	-	-	0.349	-0.276873
GNLY	rs7603438		Emilsson	Wald ratio	1	0.028	0.033	0.388316	1.029	0.965	1.097	regulatory_region_variant	MODIFIER	-	CTCF_binding_site	-	-	0.918	-0.07882
SMPDL3A	rs13192569		Emilsson	Wald ratio	1	-0.036	0.042	0.390438	0.965	0.889	1.047	intron_variant	MODIFIER	SMPDL3A	protein_coding	-	-	0.785	-0.111412
GFRAL	rs1032772		Emilsson	Wald ratio	1	0.095	0.11	0.391366	1.099	0.885	1.364	intron_variant	MODIFIER	GFRAL	protein_coding	-	-	2.155	0.107092
PLXNC1	rs6538487		Emilsson	Wald ratio	1	0.074	0.086	0.391699	1.076	0.91	1.274	intron_variant	MODIFIER	PLXNC1	protein_coding	-	-	0.082	-0.577029
PTHLH	rs41525752	rs17509534	Emilsson	Wald ratio	1	-0.168	0.197	0.393453	0.845	0.574	1.244
EN-RAGE	rs3014874		Folkersen	Wald ratio	1	-0.148	0.174	0.394574	0.862	0.613	1.213	downstream_gene_variant	MODIFIER	S100A9	protein_coding	-	-	0.217	-0.374545
CECR1	rs2231495		Emilsson	Wald ratio	1	0.024	0.028	0.395106	1.024	0.969	1.083	missense_variant	MODERATE	ADA2	protein_coding	tolerated(0.17)	benign(0)	9.561	0.816859
CECR1.6077.63.3	rs2231495		Sun	Wald ratio	1	0.025	0.029	0.395106	1.025	0.968	1.085	missense_variant	MODERATE	ADA2	protein_coding	tolerated(0.17)	benign(0)	9.561	0.816859
MFGE8	rs3743392		Suhre	Wald ratio	1	-0.0702	0.0825	0.395325	0.9322	0.793	1.0959	intron_variant	MODIFIER	MFGE8	protein_coding	-	-	3.524	0.234599
PCOLCE.11237.49.3	rs9801017		Sun	Wald ratio	1	0.103	0.122	0.396299	1.109	0.874	1.407	intron_variant	MODIFIER	TFR2	protein_coding	-	-	0.202	-0.389317
LAMC2	rs2276543		Emilsson	Wald ratio	1	-0.043	0.051	0.397628	0.958	0.866	1.059	upstream_gene_variant	MODIFIER	LAMC2	protein_coding	-	-	21.5	2.28251
CHST15	rs10794181		Emilsson	Wald ratio	1	0.171	0.202	0.397646	1.186	0.799	1.761	intergenic_variant	MODIFIER	-	-	-	-	0.027	-0.786822
PCOLCE2	rs4683702		Emilsson	Wald ratio	1	-0.05	0.059	0.398168	0.951	0.847	1.068	intergenic_variant	MODIFIER	-	-	-	-	11.13	0.961147
CA13	rs17741049		Suhre	Wald ratio	1	-0.0548	0.0651	0.399242	0.9466	0.8333	1.0754	downstream_gene_variant	MODIFIER	CA13	protein_coding	-	-	2.001	0.089777
IL12RB2	rs4655701		Emilsson	Wald ratio	1	0.129	0.154	0.399607	1.138	0.842	1.538	intron_variant	MODIFIER	IL12RB2	protein_coding	-	-	0.43	-0.234538
HGFAC	rs2498323		Emilsson	Wald ratio	1	-0.02	0.024	0.399879	0.98	0.936	1.027	missense_variant	MODERATE	HGFAC	protein_coding	tolerated(0.13)	benign(0.141)	19.7	2.05869
LIFR	rs3099122		Emilsson	Wald ratio	1	0.174	0.207	0.400088	1.19	0.794	1.784	intron_variant,non_coding_transcript_variant	MODIFIER	LIFR-AS1	lncRNA	-	-	0.821	-0.102019
OAF	rs2845705		Emilsson	Wald ratio	1	0.043	0.051	0.400227	1.043	0.945	1.152	downstream_gene_variant	MODIFIER	OAF	protein_coding	-	-	1.077	-0.045233
NT5C.12560.9.3	rs78625720		Sun	Wald ratio	1	-0.079	0.094	0.40094	0.924	0.769	1.111	intron_variant	MODIFIER	JPT1	protein_coding	-	-	0.759	-0.118455
EXOSC1	rs7911122	rs12767760	Emilsson	Wald ratio	1	-0.177	0.211	0.401757	0.838	0.554	1.267
MPG	rs77546475		Emilsson	Wald ratio	1	0.185	0.22	0.401893	1.203	0.781	1.853
GPX7.8345.27.3	rs1097234		Sun	Wald ratio	1	-0.046	0.055	0.403445	0.955	0.857	1.064	upstream_gene_variant	MODIFIER	GPX7	protein_coding	-	-	6.102	0.461902
IGLL1	rs140174		Emilsson	Wald ratio	1	0.083	0.1	0.404022	1.087	0.894	1.322	upstream_gene_variant	MODIFIER	IGLL1	protein_coding	-	-	3.915	0.267963
FRZB	rs288326		Suhre	Wald ratio	1	0.0454	0.0544	0.404162	1.0465	0.9406	1.1643	missense_variant	MODERATE	FRZB	protein_coding	deleterious(0)	probably_damaging(0.997)	29.1	4.2455
FRZB.13740.51.3	rs288326		Sun	Wald ratio	1	0.056	0.067	0.404162	1.058	0.927	1.207	missense_variant	MODERATE	FRZB	protein_coding	deleterious(0)	probably_damaging(0.997)	29.1	4.2455
HBEGF	rs1142828		Emilsson	Wald ratio	1	-0.205	0.246	0.404657	0.814	0.503	1.32	downstream_gene_variant	MODIFIER	PFDN1	protein_coding	-	-	0.584	-0.172995
HDHD2	rs76922914		Emilsson	Wald ratio	1	0.047	0.056	0.404839	1.048	0.939	1.17	intron_variant	MODIFIER	IER3IP1	protein_coding	-	-	2.471	0.139802
CBR3	rs60409141		Emilsson	Wald ratio	1	-0.03	0.036	0.405427	0.97	0.903	1.042	intron_variant	MODIFIER	CBR3	protein_coding	-	-	1.228	-0.01784
C9	rs265721		Emilsson	Wald ratio	1	0.148	0.178	0.406065	1.16	0.818	1.644	intron_variant	MODIFIER	C9	protein_coding	-	-	1.566	0.034473
IGFALS	rs1065666		Emilsson	Wald ratio	1	-0.175	0.21	0.406995	0.84	0.556	1.269	3_prime_UTR_variant	MODIFIER	NUBP2	protein_coding	-	-	3.828	0.260556
OSMR.10892.8.3	rs357253		Sun	Wald ratio	1	-0.111	0.134	0.407695	0.895	0.689	1.163	intron_variant	MODIFIER	OSMR	protein_coding	-	-	1.964	0.085412
GZMB	rs11539752		Emilsson	Wald ratio	1	0.041	0.049	0.408399	1.041	0.946	1.147	missense_variant	MODERATE	GZMB	protein_coding	tolerated(1)	benign(0)	0.002	-1.24267
GOLM1	rs7854118		Emilsson	Wald ratio	1	0.114	0.139	0.408953	1.121	0.854	1.471	intergenic_variant	MODIFIER	-	-	-	-	3.292	0.214625
TREM1	rs3789204		Emilsson	Wald ratio	1	-0.058	0.07	0.409697	0.944	0.823	1.083	upstream_gene_variant	MODIFIER	TREM1	protein_coding	-	-	9.937	0.853528
SYT11	rs145976521		Emilsson	Wald ratio	1	-0.071	0.087	0.410119	0.931	0.786	1.103	intron_variant	MODIFIER	GON4L	protein_coding	-	-	0.825	-0.101053
CHGA	rs9658667		Emilsson	Wald ratio	1	-0.078	0.094	0.410555	0.925	0.769	1.113	missense_variant	MODERATE	CHGA	protein_coding	deleterious(0.04)	benign(0.184)	19.72	2.06135
DUSP13	rs6480769		Emilsson	Wald ratio	1	0.045	0.055	0.411058	1.046	0.94	1.164	downstream_gene_variant	MODIFIER	DUSP13	protein_coding	-	-	0.459	-0.221686
ITIH4	rs2239547		Emilsson	Wald ratio	1	0.157	0.191	0.411327	1.17	0.805	1.7	intron_variant,NMD_transcript_variant	MODIFIER	-	nonsense_mediated_decay	-	-	5.938	0.446726
SERPINF1	rs1136287		Emilsson	Wald ratio	1	0.056	0.069	0.412038	1.058	0.925	1.21	missense_variant	MODERATE	SERPINF1	protein_coding	tolerated(0.21)	benign(0.006)	0.335	-0.285102
HP	rs77303550		Emilsson	Wald ratio	1	-0.028	0.034	0.412216	0.972	0.909	1.04	intron_variant	MODIFIER	TXNL4B	protein_coding	-	-	0.717	-0.13053
ADAM23	rs1448903		Emilsson	Wald ratio	1	-0.063	0.077	0.412244	0.939	0.808	1.091	intron_variant	MODIFIER	ADAM23	protein_coding	-	-	2.237	0.115856
KYNU	rs3768844		Emilsson	Wald ratio	1	0.044	0.054	0.412403	1.045	0.941	1.161	intron_variant	MODIFIER	KYNU	protein_coding	-	-	13.96	1.24174
NRP2	rs16837641		Emilsson	Wald ratio	1	-0.159	0.194	0.413253	0.853	0.583	1.248	intron_variant	MODIFIER	NRP2	protein_coding	-	-	4.512	0.319225
NRP2.6590.54.3	rs16837641		Sun	Wald ratio	1	-0.103	0.126	0.413253	0.902	0.705	1.155	intron_variant	MODIFIER	NRP2	protein_coding	-	-	4.512	0.319225
FAM3D	rs6807381		Emilsson	Wald ratio	1	0.08	0.098	0.413654	1.084	0.894	1.314	intron_variant	MODIFIER	FAM3D	protein_coding	-	-	5.013	0.363079
CCL7	rs3138036		Suhre	Wald ratio	1	0.0262	0.0321	0.414386	1.0265	0.9639	1.0932	intron_variant	MODIFIER	CCL8	protein_coding	-	-	0.711	-0.132093
CCL8	rs3138036		Suhre	Wald ratio	1	0.0557	0.0683	0.414386	1.0573	0.9249	1.2088	intron_variant	MODIFIER	CCL8	protein_coding	-	-	0.711	-0.132093
METTL24	rs12189608		Emilsson	Wald ratio	1	-0.134	0.164	0.414426	0.875	0.634	1.206	intron_variant	MODIFIER	METTL24	protein_coding	-	-	1.837	0.070134
INSL5	rs17495511		Emilsson	Wald ratio	1	-0.158	0.194	0.414948	0.853	0.583	1.249	upstream_gene_variant	MODIFIER	INSL5	protein_coding	-	-	0.39	-0.254368
CCL3	rs1102934		Emilsson	Wald ratio	1	0.041	0.05	0.415241	1.041	0.945	1.148	upstream_gene_variant	MODIFIER	CCL18	protein_coding	-	-	2.553	0.147851
CCL3L1	rs1102934		Emilsson	Wald ratio	1	0.059	0.073	0.415241	1.061	0.92	1.223	upstream_gene_variant	MODIFIER	CCL18	protein_coding	-	-	2.553	0.147851
CXCL1	rs3117600		Suhre	Wald ratio	1	0.0206	0.0254	0.416086	1.0208	0.9713	1.0729	upstream_gene_variant	MODIFIER	CXCL1	protein_coding	-	-	2.818	0.172654
CALCOCO2	rs550510		Emilsson	Wald ratio	1	0.143	0.176	0.416826	1.154	0.817	1.63	missense_variant,splice_region_variant	MODERATE	CALCOCO2	protein_coding	tolerated(0.22)	benign(0.071)	19.1	1.97969
IGFBP5	rs139739387		Emilsson	Wald ratio	1	0.164	0.202	0.417525	1.178	0.792	1.752	intron_variant	MODIFIER	RPL37A	protein_coding	-	-	1.091	-0.042629
TPSB2	rs4984778		Suhre	Wald ratio	1	-0.042	0.0518	0.418112	0.9589	0.8663	1.0614	downstream_gene_variant	MODIFIER	TPSAB1	protein_coding	-	-	2.053	0.095743
SPINK6.5731.1.3	rs1432688		Sun	Wald ratio	1	-0.033	0.041	0.418151	0.967	0.892	1.049	intron_variant,non_coding_transcript_variant	MODIFIER	-	lncRNA	-	-	6.807	0.529247
GNLY.3195.50.2	rs12151621		Sun	Wald ratio	1	0.03	0.037	0.418407	1.03	0.959	1.107	TF_binding_site_variant	MODIFIER	-	-	-	-	0.035	-0.741082
GNLY	rs12151621		Suhre	Wald ratio	1	0.0254	0.0314	0.418407	1.0257	0.9645	1.0908	TF_binding_site_variant	MODIFIER	-	-	-	-	0.035	-0.741082
CKM	rs75727214		Emilsson	Wald ratio	1	-0.132	0.163	0.418598	0.876	0.636	1.207	intron_variant	MODIFIER	EXOC3L2	protein_coding	-	-	0.681	-0.141184
CCL3L1.2783.18.2	rs2015086		Sun	Wald ratio	1	0.056	0.069	0.419332	1.057	0.923	1.211	upstream_gene_variant	MODIFIER	CCL18	protein_coding	-	-	1.652	0.046256
CTSD	rs55861089		Emilsson	Wald ratio	1	0.08	0.099	0.420616	1.083	0.892	1.316	intron_variant	MODIFIER	-	protein_coding	-	-	2.083	0.099084
CTSD	rs55861089		Folkersen	Wald ratio	1	0.077	0.096	0.420616	1.08	0.896	1.303	intron_variant	MODIFIER	-	protein_coding	-	-	2.083	0.099084
THYN1	rs486119		Emilsson	Wald ratio	1	-0.14	0.174	0.421397	0.87	0.619	1.222	upstream_gene_variant	MODIFIER	GLB1L3	protein_coding	-	-	4.597	0.32667
PDIA5.5593.11.3	rs2278668		Sun	Wald ratio	1	0.037	0.046	0.421774	1.037	0.948	1.135	intron_variant	MODIFIER	PDIA5	protein_coding	-	-	7.909	0.641383
PTN.3045.72.2	rs1431093		Sun	Wald ratio	1	-0.086	0.107	0.423711	0.918	0.744	1.132	intron_variant	MODIFIER	PTN	protein_coding	-	-	8.288	0.68187
CD72	rs4879924		Emilsson	Wald ratio	1	0.149	0.186	0.424063	1.16	0.806	1.67	downstream_gene_variant	MODIFIER	CA9	protein_coding	-	-	6.755	0.524206
SHBG	rs858519		Emilsson	Wald ratio	1	0.09	0.113	0.425637	1.094	0.877	1.364	upstream_gene_variant	MODIFIER	SHBG	protein_coding	-	-	4.16	0.288922
APOA5	rs964184		Emilsson	Wald ratio	1	0.073	0.092	0.426426	1.076	0.898	1.289	3_prime_UTR_variant	MODIFIER	ZPR1	protein_coding	-	-	0.429	-0.234962
APOC3	rs964184		Emilsson	Wald ratio	1	-0.14	0.176	0.426426	0.869	0.615	1.228	3_prime_UTR_variant	MODIFIER	ZPR1	protein_coding	-	-	0.429	-0.234962
KYNU	rs9013		Suhre	Wald ratio	1	0.0233	0.0294	0.426737	1.0236	0.9663	1.0843	missense_variant	MODERATE	KYNU	protein_coding	tolerated(0.38)	benign(0.001)	13.99	1.2463
SPINK2	rs9993023		Emilsson	Wald ratio	1	0.087	0.11	0.426791	1.091	0.88	1.354	upstream_gene_variant	MODIFIER	SPINK2	protein_coding	-	-	1.705	0.053264
UROS.11248.43.3	rs10794029		Sun	Wald ratio	1	-0.099	0.125	0.427303	0.906	0.709	1.157	intron_variant	MODIFIER	DHX32	protein_coding	-	-	0.062	-0.631941
PDIA5	rs920900		Emilsson	Wald ratio	1	0.016	0.02	0.427633	1.016	0.977	1.057	intron_variant	MODIFIER	PDIA5	protein_coding	-	-	6.858	0.534247
PDCD5.12517.52.3	rs4499344		Sun	Wald ratio	1	0.057	0.073	0.429596	1.059	0.919	1.221	intron_variant	MODIFIER	PDCD5	protein_coding	-	-	0.13	-0.481294
PDCD5	rs4499344		Emilsson	Wald ratio	1	0.08	0.101	0.429596	1.083	0.889	1.319	intron_variant	MODIFIER	PDCD5	protein_coding	-	-	0.13	-0.481294
EVA1C.8877.22.3	rs6517101		Sun	Wald ratio	1	-0.111	0.141	0.429713	0.895	0.679	1.179	intron_variant	MODIFIER	EVA1C	protein_coding	-	-	0.077	-0.588841
EVA1C	rs6517101		Emilsson	Wald ratio	1	-0.111	0.14	0.429713	0.895	0.68	1.178	intron_variant	MODIFIER	EVA1C	protein_coding	-	-	0.077	-0.588841
MFGE8	rs12898558		Emilsson	Wald ratio	1	-0.074	0.094	0.430768	0.929	0.773	1.116	intergenic_variant	MODIFIER	-	-	-	-	9.323	0.793093
IL16	rs7166271		Emilsson	Wald ratio	1	-0.04	0.051	0.431114	0.961	0.869	1.062	downstream_gene_variant	MODIFIER	STARD5	protein_coding	-	-	6.63	0.512071
ENG	rs8176749		Suhre	Wald ratio	1	-0.0595	0.0762	0.434924	0.9423	0.8116	1.094	synonymous_variant	LOW	ABO	protein_coding	-	-	5.542	0.410444
NOTCH1	rs8176749		Suhre	Wald ratio	1	-0.0835	0.1069	0.434924	0.9199	0.746	1.1344	synonymous_variant	LOW	ABO	protein_coding	-	-	5.542	0.410444
S100A4.14116.129.3	rs58056804		Sun	Wald ratio	1	-0.095	0.122	0.43585	0.909	0.716	1.155	upstream_gene_variant	MODIFIER	S100A3	protein_coding	-	-	0.773	-0.11468
CHL1	rs13077895		Emilsson	Wald ratio	1	-0.1	0.128	0.436163	0.905	0.703	1.164	downstream_gene_variant	MODIFIER	-	lncRNA	-	-	4.79	0.343474
FN1	rs1250259		Emilsson	Wald ratio	1	-0.042	0.053	0.4367	0.959	0.864	1.065	missense_variant	MODERATE	FN1	protein_coding	tolerated(1)	benign(0)	21.4	2.26932
KYNU.4559.64.2	rs3816193		Sun	Wald ratio	1	0.047	0.061	0.438195	1.048	0.93	1.181	3_prime_UTR_variant	MODIFIER	KYNU	protein_coding	-	-	0.086	-0.566758
PF4V1	rs872914		Emilsson	Wald ratio	1	0.026	0.033	0.438452	1.026	0.961	1.096	upstream_gene_variant	MODIFIER	PF4V1	protein_coding	-	-	8.828	0.740768
METAP2	rs804327		Emilsson	Wald ratio	1	-0.148	0.192	0.438515	0.862	0.592	1.255	upstream_gene_variant	MODIFIER	-	processed_pseudogene	-	-	5.121	0.372674
DAPK2	rs922182		Suhre	Wald ratio	1	-0.048	0.0621	0.439224	0.9531	0.8439	1.0764	intron_variant	MODIFIER	DAPK2	protein_coding	-	-	0.333	-0.286552
IFNLR1	rs12046369		Emilsson	Wald ratio	1	-0.133	0.172	0.439363	0.876	0.625	1.226	upstream_gene_variant	MODIFIER	LINC02800	lncRNA	-	-	5.723	0.426938
DUSP13.6525.17.3	rs6480771		Sun	Wald ratio	1	0.06	0.079	0.443112	1.062	0.91	1.24	upstream_gene_variant	MODIFIER	DUSP13	protein_coding	-	-	3.06	0.194423
GRN	rs850733		Yao	Wald ratio	1	-0.086	0.113	0.445432	0.918	0.736	1.144	intron_variant	MODIFIER	ITGA2B	protein_coding	-	-	0.432	-0.23386
HP	rs217181		Suhre	Wald ratio	1	-0.0238	0.0312	0.445737	0.9765	0.9185	1.0381	downstream_gene_variant	MODIFIER	HPR	protein_coding	-	-	5.907	0.443805
HP.3054.3.2	rs217184	rs217181	Sun	Wald ratio	1	0.026	0.034	0.445737	1.027	0.96	1.098
IL6ST.2620.4.2	rs11574765		Sun	Wald ratio	1	-0.074	0.097	0.446348	0.929	0.768	1.123	intron_variant	MODIFIER	IL6ST	protein_coding	-	-	4.688	0.334533
PF4V1.5663.18.3	rs941758		Sun	Wald ratio	1	0.041	0.053	0.44644	1.042	0.938	1.157	upstream_gene_variant	MODIFIER	PF4V1	protein_coding	-	-	13.31	1.16035
APMAP	rs2150649		Emilsson	Wald ratio	1	0.088	0.116	0.446631	1.092	0.87	1.37	regulatory_region_variant	MODIFIER	-	CTCF_binding_site	-	-	1.073	-0.046001
MBL2.3000.66.1	rs7899547		Sun	Wald ratio	1	-0.02	0.026	0.447157	0.98	0.932	1.032	upstream_gene_variant	MODIFIER	MBL2	protein_coding	-	-	1.073	-0.046094
MBL2	rs7899547		Emilsson	Wald ratio	1	-0.02	0.027	0.447157	0.98	0.929	1.033	upstream_gene_variant	MODIFIER	MBL2	protein_coding	-	-	1.073	-0.046094
FCGR3B	rs2099684		Emilsson	Wald ratio	1	-0.05	0.065	0.447614	0.952	0.838	1.081	downstream_gene_variant	MODIFIER	HSPA6	protein_coding	-	-	0.084	-0.572195
AFM	rs1919480		Emilsson	Wald ratio	1	0.077	0.101	0.447683	1.08	0.886	1.316	intron_variant,non_coding_transcript_variant	MODIFIER	LINC02499	lncRNA	-	-	1.284	-0.008281
FN1	rs1250258		Suhre	Wald ratio	1	-0.0288	0.038	0.447697	0.9716	0.9019	1.0467	intron_variant	MODIFIER	FN1	protein_coding	-	-	4.084	0.282396
ESD	rs1216987		Emilsson	Wald ratio	1	-0.13	0.172	0.449442	0.878	0.627	1.23	downstream_gene_variant	MODIFIER	ESD	protein_coding	-	-	1.001	-0.060532
SPATA20	rs989128		Emilsson	Wald ratio	1	0.042	0.056	0.449761	1.043	0.935	1.163	upstream_gene_variant	MODIFIER	CACNA1G	protein_coding	-	-	14.68	1.34181
NCAM2	rs2826851		Emilsson	Wald ratio	1	0.055	0.073	0.449916	1.057	0.916	1.219	intron_variant	MODIFIER	NCAM2	protein_coding	-	-	3.361	0.220635
OPG	rs7813395		Folkersen	Wald ratio	1	-0.216	0.287	0.45079	0.805	0.459	1.414	intron_variant	MODIFIER	SAMD12	protein_coding	-	-	12.31	1.05641
NAGK	rs2287327		Emilsson	Wald ratio	1	0.048	0.063	0.452051	1.049	0.926	1.187	intron_variant	MODIFIER	NAGK	protein_coding	-	-	6.981	0.546355
PVRL2	rs440277		Emilsson	Wald ratio	1	0.167	0.223	0.452156	1.182	0.764	1.83	intron_variant	MODIFIER	NECTIN2	protein_coding	-	-	0.964	-0.068575
TNFSF14	rs344560		Folkersen	Wald ratio	1	-0.06	0.08	0.452357	0.942	0.805	1.101	stop_gained	HIGH	TNFSF14	protein_coding	-	-	36	6.63603
THBS2	rs73041845		Emilsson	Wald ratio	1	-0.055	0.074	0.452498	0.946	0.819	1.093	regulatory_region_variant	MODIFIER	-	open_chromatin_region	-	-	2.592	0.151555
KDR	rs34231037		Suhre	Wald ratio	1	0.0458	0.061	0.45262	1.0469	0.9289	1.1799	missense_variant	MODERATE	KDR	protein_coding	deleterious(0)	probably_damaging(0.999)	25.1	3.62207
CNDP1	rs17817077		Suhre	Wald ratio	1	-0.0517	0.0689	0.45263	0.9496	0.8297	1.0868	intron_variant	MODIFIER	CNDP1	protein_coding	-	-	1.929	0.081282
PYGL	rs2297890		Emilsson	Wald ratio	1	-0.159	0.212	0.453836	0.853	0.563	1.293	upstream_gene_variant	MODIFIER	PYGL	protein_coding	-	-	9.032	0.762875
APOE	rs4420638		Suhre	Wald ratio	1	-0.0642	0.0862	0.45618	0.9378	0.7921	1.1103	downstream_gene_variant	MODIFIER	APOC1	protein_coding	-	-	0.266	-0.332695
LARGE	rs13054775		Emilsson	Wald ratio	1	0.145	0.194	0.456411	1.156	0.79	1.691	intron_variant	MODIFIER	LARGE1	protein_coding	-	-	0.143	-0.462035
NPW	rs112050738		Emilsson	Wald ratio	1	0.043	0.057	0.456465	1.044	0.933	1.168	upstream_gene_variant	MODIFIER	NPW	protein_coding	-	-	3.81	0.259025
HGFAC	rs1203119		Suhre	Wald ratio	1	0.0357	0.048	0.456764	1.0364	0.9433	1.1387	intron_variant	MODIFIER	RGS12	protein_coding	-	-	1.16	-0.029802
ALPP	rs12478529		Emilsson	Wald ratio	1	0.062	0.083	0.457861	1.064	0.904	1.253	upstream_gene_variant	MODIFIER	-	lncRNA	-	-	3.468	0.229822
JAM3	rs655627		Emilsson	Wald ratio	1	0.097	0.13	0.458289	1.102	0.853	1.422	3_prime_UTR_variant	MODIFIER	NCAPD3	protein_coding	-	-	0.032	-0.759554
FAM20A.6433.57.3	rs929477		Sun	Wald ratio	1	0.081	0.109	0.458463	1.084	0.875	1.343	intron_variant,non_coding_transcript_variant	MODIFIER	LINC01482	lncRNA	-	-	0.378	-0.260664
NCAM1.4498.62.2	rs7113211		Sun	Wald ratio	1	-0.084	0.114	0.459042	0.919	0.735	1.149	intergenic_variant	MODIFIER	-	-	-	-	0.774	-0.114511
MDH1	rs10209140		Emilsson	Wald ratio	1	0.122	0.166	0.460043	1.13	0.817	1.563	intron_variant,non_coding_transcript_variant	MODIFIER	WDPCP	processed_transcript	-	-	7.24	0.572176
MANSC4.9578.263.3	rs36138811		Sun	Wald ratio	1	-0.033	0.045	0.461218	0.968	0.886	1.056	intron_variant	MODIFIER	MANSC4	protein_coding	-	-	0.976	-0.065908
MANSC4	rs11049131		Emilsson	Wald ratio	1	-0.025	0.034	0.461218	0.975	0.911	1.043	intron_variant	MODIFIER	MANSC4	protein_coding	-	-	2.668	0.158823
C1RL	rs6488561		Emilsson	Wald ratio	1	0.077	0.104	0.461332	1.08	0.88	1.324	downstream_gene_variant	MODIFIER	C1RL	protein_coding	-	-	0.066	-0.618511
ADH4	rs1800759		Emilsson	Wald ratio	1	-0.112	0.152	0.461486	0.894	0.663	1.205	upstream_gene_variant	MODIFIER	ADH4	protein_coding	-	-	13.98	1.24409
ENTHD2.7947.19.3	rs61745945		Sun	Wald ratio	1	-0.085	0.116	0.461913	0.918	0.732	1.152	missense_variant	MODERATE	TEPSIN	protein_coding	deleterious(0.02)	benign(0)	20.6	2.15861
CCL22	rs62037146		Emilsson	Wald ratio	1	0.078	0.106	0.462797	1.081	0.878	1.33
TIMP3	rs2097326		Suhre	Wald ratio	1	-0.0206	0.0281	0.463666	0.9796	0.927	1.0351	intron_variant	MODIFIER	SYN3	protein_coding	-	-	0.196	-0.395834
SIGLEC9.3007.7.2	rs2075803		Sun	Wald ratio	1	0.016	0.021	0.46492	1.016	0.974	1.059	stop_gained	HIGH	SIGLEC9	protein_coding	-	-	32	4.45768
ICAM4	rs5030398		Emilsson	Wald ratio	1	-0.186	0.255	0.465613	0.83	0.503	1.369	intron_variant	MODIFIER	ICAM1	protein_coding	-	-	0.67	-0.144464
C1QTNF3	rs840390		Emilsson	Wald ratio	1	-0.125	0.171	0.465936	0.883	0.631	1.234	intron_variant,NMD_transcript_variant	MODIFIER	C1QTNF3-AMACR	nonsense_mediated_decay	-	-	1.232	-0.017116
PPA1	rs10823500		Suhre	Wald ratio	1	0.0441	0.0606	0.466372	1.0451	0.9281	1.1769	downstream_gene_variant	MODIFIER	NPFFR1	protein_coding	-	-	4.155	0.288495
PLG	rs12191307		Emilsson	Wald ratio	1	-0.05	0.069	0.4678	0.951	0.832	1.088	intergenic_variant	MODIFIER	-	-	-	-	0.493	-0.207076
MCP-1	rs12601658		Folkersen	Wald ratio	1	-0.319	0.44	0.468065	0.727	0.307	1.721	regulatory_region_variant	MODIFIER	-	promoter_flanking_region	-	-	0.366	-0.267191
APCS	rs12079353		Suhre	Wald ratio	1	-0.0643	0.0887	0.468651	0.9377	0.7881	1.1158	upstream_gene_variant	MODIFIER	APCS	protein_coding	-	-	0.084	-0.570979
GFRA2	rs15881		Emilsson	Wald ratio	1	-0.057	0.078	0.470718	0.945	0.81	1.102	3_prime_UTR_variant	MODIFIER	GFRA2	protein_coding	-	-	4.429	0.312093
GFRA2.2515.14.3	rs15881		Sun	Wald ratio	1	-0.06	0.083	0.470718	0.942	0.801	1.108	3_prime_UTR_variant	MODIFIER	GFRA2	protein_coding	-	-	4.429	0.312093
PDGFRA	rs67388297		Emilsson	Wald ratio	1	0.114	0.158	0.470877	1.121	0.822	1.529	intron_variant	MODIFIER	PDGFRA	protein_coding	-	-	1.933	0.081745
AFP	rs6829551		Emilsson	Wald ratio	1	-0.106	0.147	0.471525	0.9	0.674	1.2	intron_variant,non_coding_transcript_variant	MODIFIER	-	lncRNA	-	-	0.704	-0.134379
NTproBNP	rs198379		Yao	Wald ratio	1	-0.068	0.094	0.471525	0.935	0.777	1.124	downstream_gene_variant	MODIFIER	NPPB	protein_coding	-	-	2.955	0.185089
PLXNC1	rs2361355		Suhre	Wald ratio	1	0.0373	0.0519	0.472855	1.038	0.9375	1.1492	intron_variant	MODIFIER	PLXNC1	protein_coding	-	-	14.21	1.27591
CCL3.3040.59.1	rs712042		Sun	Wald ratio	1	0.034	0.047	0.473489	1.035	0.943	1.135	intron_variant	MODIFIER	CCL18	protein_coding	-	-	1.663	0.047741
CCL18	rs712042		Emilsson	Wald ratio	1	0.027	0.038	0.473489	1.028	0.954	1.108	intron_variant	MODIFIER	CCL18	protein_coding	-	-	1.663	0.047741
UROS	rs2027515		Emilsson	Wald ratio	1	-0.063	0.089	0.475051	0.939	0.789	1.117	intron_variant	MODIFIER	UROS	protein_coding	-	-	0.032	-0.756738
sGP130	rs11747625		Yao	Wald ratio	1	0.086	0.12	0.476492	1.089	0.861	1.379	intron_variant	MODIFIER	IL6ST	protein_coding	-	-	1.51	0.026421
ST3GAL1.5657.28.3	rs9643300		Sun	Wald ratio	1	-0.067	0.095	0.476506	0.935	0.777	1.125	intron_variant	MODIFIER	ST3GAL1	protein_coding	-	-	0.073	-0.600235
NOTCH2	rs3009190		Emilsson	Wald ratio	1	0.163	0.229	0.476873	1.177	0.751	1.844	upstream_gene_variant	MODIFIER	NBPF7	unprocessed_pseudogene	-	-	2.99	0.188227
XXYLT1	rs55947051		Emilsson	Wald ratio	1	0.096	0.135	0.477427	1.101	0.845	1.434	intergenic_variant	MODIFIER	-	-	-	-	1.117	-0.037737
OAF.6414.8.3	rs117554512		Sun	Wald ratio	1	0.045	0.064	0.477904	1.046	0.923	1.185	intron_variant	MODIFIER	OAF	protein_coding	-	-	3.742	0.253183
CD200R1.5103.30.3	rs6791672		Sun	Wald ratio	1	0.096	0.135	0.478411	1.1	0.845	1.433	regulatory_region_variant	MODIFIER	-	promoter_flanking_region	-	-	4.399	0.309495
IGFLR1.7244.16.3	rs12459634		Sun	Wald ratio	1	-0.034	0.049	0.478434	0.966	0.879	1.063	3_prime_UTR_variant,NMD_transcript_variant	MODIFIER	-	nonsense_mediated_decay	-	-	6.863	0.534717
PTPRJ	rs12574500		Emilsson	Wald ratio	1	0.112	0.158	0.478985	1.119	0.82	1.525	intron_variant	MODIFIER	PTPRJ	protein_coding	-	-	13.4	1.17116
IL6ST	rs7730934		Suhre	Wald ratio	1	-0.0453	0.064	0.479243	0.9557	0.8431	1.0834	intron_variant	MODIFIER	IL6ST	protein_coding	-	-	1.313	-0.003631
PRSS22.4534.10.2	rs3810801		Sun	Wald ratio	1	-0.06	0.084	0.479838	0.942	0.798	1.112	upstream_gene_variant	MODIFIER	PRSS30P	transcribed_unitary_pseudogene	-	-
TNFAIP6	rs2278089		Emilsson	Wald ratio	1	-0.03	0.043	0.481617	0.97	0.892	1.055	upstream_gene_variant	MODIFIER	NMI	protein_coding	-	-	4.008	0.275918
MGAT2.6909.40.3	rs28396798	rs7150505	Sun	Wald ratio	1	0.084	0.119	0.482314	1.087	0.861	1.373
C5	rs1035029		Emilsson	Wald ratio	1	-0.093	0.133	0.48238	0.911	0.702	1.182	intron_variant	MODIFIER	C5	protein_coding	-	-	1.253	-0.013478
PCYOX1	rs2706762		Emilsson	Wald ratio	1	-0.03	0.043	0.483742	0.971	0.893	1.055	missense_variant	MODERATE	PCYOX1	protein_coding	tolerated(1)	benign(0.001)	17.6	1.78177
FCER2	rs2277989		Emilsson	Wald ratio	1	-0.069	0.1	0.485604	0.933	0.767	1.134	intron_variant	MODIFIER	FCER2	protein_coding	-	-	6.55	0.504341
PTGFRN.12727.7.3	rs4233450		Sun	Wald ratio	1	0.022	0.032	0.485702	1.022	0.961	1.088	intron_variant	MODIFIER	PTGFRN	protein_coding	-	-	0.521	-0.195831
PTGFRN	rs4233450		Emilsson	Wald ratio	1	0.046	0.066	0.485702	1.047	0.92	1.193	intron_variant	MODIFIER	PTGFRN	protein_coding	-	-	0.521	-0.195831
MAN1A2	rs1289863		Emilsson	Wald ratio	1	0.082	0.118	0.486206	1.085	0.862	1.367	intron_variant,non_coding_transcript_variant	MODIFIER	LINC01525	lncRNA	-	-	3.795	0.257715
NEO1	rs8026121		Emilsson	Wald ratio	1	0.097	0.14	0.487331	1.102	0.838	1.449	intron_variant	MODIFIER	NEO1	protein_coding	-	-	8.348	0.688358
FGFR3	rs2403274		Emilsson	Wald ratio	1	-0.107	0.155	0.488039	0.898	0.663	1.217	regulatory_region_variant	MODIFIER	-	CTCF_binding_site	-	-	2.221	0.114149
EPHA1	rs4725617	rs10952550	Emilsson	Wald ratio	1	0.026	0.038	0.488211	1.027	0.953	1.105
EPHA1	rs4725617	rs10952550	Suhre	Wald ratio	1	-0.0236	0.0341	0.488211	0.9767	0.9136	1.0441
IL18R1	rs1861246		Emilsson	Wald ratio	1	0.027	0.038	0.488399	1.027	0.953	1.107	intron_variant	MODIFIER	IL1RL1	protein_coding	-	-	4.085	0.282515
DPT	rs494189		Suhre	Wald ratio	1	0.053	0.0766	0.489455	1.0544	0.9074	1.2252	intron_variant,non_coding_transcript_variant	MODIFIER	-	lncRNA	-	-	5.004	0.362257
NTRK3	rs9944243		Emilsson	Wald ratio	1	0.102	0.148	0.489483	1.108	0.829	1.48	intron_variant	MODIFIER	NTRK3	protein_coding	-	-	16.67	1.64556
CRELD1	rs7615408		Emilsson	Wald ratio	1	-0.019	0.027	0.490171	0.982	0.931	1.035	downstream_gene_variant	MODIFIER	EMC3	protein_coding	-	-	3.389	0.223038
PLA2G2A.2692.74.2	rs11573156		Sun	Wald ratio	1	-0.019	0.028	0.49026	0.981	0.928	1.036	upstream_gene_variant	MODIFIER	PLA2G2A	protein_coding	-	-	0.143	-0.4615
PCBD1	rs72818110		Emilsson	Wald ratio	1	0.111	0.161	0.490591	1.117	0.815	1.532	intron_variant	MODIFIER	SGPL1	protein_coding	-	-	1.799	0.065415
PTX3	rs9859018		Folkersen	Wald ratio	1	-0.181	0.263	0.491319	0.834	0.498	1.397	intron_variant	MODIFIER	VEPH1	protein_coding	-	-	0.411	-0.243602
MANBA.6382.17.3	rs227370		Sun	Wald ratio	1	-0.031	0.044	0.492242	0.97	0.889	1.058	intron_variant	MODIFIER	MANBA	protein_coding	-	-	0.723	-0.128863
SCARF1	rs8071756		Suhre	Wald ratio	1	0.0332	0.0485	0.493145	1.0338	0.9401	1.1368	intron_variant	MODIFIER	PRPF8	protein_coding	-	-	2.536	0.146163
JPH3	rs61387673	rs4843263	Emilsson	Wald ratio	1	0.141	0.207	0.495074	1.152	0.768	1.727
LY9.3324.51.1	rs12128261		Sun	Wald ratio	1	-0.081	0.119	0.497568	0.923	0.731	1.164	upstream_gene_variant	MODIFIER	LY9	protein_coding	-	-	2.593	0.151642
SPOCK3	rs62353586		Emilsson	Wald ratio	1	0.037	0.055	0.498529	1.038	0.932	1.155	intron_variant	MODIFIER	SPOCK3	protein_coding	-	-	4.183	0.290921
S100A7	rs3014860		Emilsson	Wald ratio	1	0.032	0.047	0.499732	1.032	0.942	1.131	intron_variant	MODIFIER	PGLYRP4	protein_coding	-	-	0.058	-0.645761
BCAN	rs7541549		Emilsson	Wald ratio	1	-0.093	0.138	0.501915	0.912	0.696	1.194	upstream_gene_variant	MODIFIER	HAPLN2	protein_coding	-	-	0.789	-0.110436
EPHA1.3431.54.2	rs4421280		Sun	Wald ratio	1	0.035	0.051	0.502168	1.035	0.936	1.145	intron_variant	MODIFIER	EPHA1	protein_coding	-	-	3.508	0.233262
SIRPA.5430.66.3	rs6136377		Sun	Wald ratio	1	0.014	0.021	0.502483	1.014	0.973	1.057	intron_variant	MODIFIER	SIRPA	protein_coding	-	-	0.02	-0.839902
FAM3B	rs58958361	rs57529409	Emilsson	Wald ratio	1	-0.05	0.075	0.503554	0.951	0.821	1.102
FAM3B.5618.50.3	rs57529409		Sun	Wald ratio	1	-0.046	0.069	0.503554	0.955	0.835	1.092	intron_variant	MODIFIER	FAM3B	protein_coding	-	-	1.482	0.022471
PLAT	rs77346091		Emilsson	Wald ratio	1	0.096	0.144	0.50364	1.101	0.83	1.46	intron_variant	MODIFIER	AP3M2	protein_coding	-	-	9.55	0.815782
PRLR	rs16873193		Emilsson	Wald ratio	1	-0.164	0.245	0.504204	0.849	0.525	1.373	intergenic_variant	MODIFIER	-	-	-	-	1.795	0.064839
MST1	rs9858542		Suhre	Wald ratio	1	0.0131	0.0196	0.504985	1.0132	0.9749	1.0529	synonymous_variant	LOW	BSN	protein_coding	-	-	0.509	-0.200546
KLK7	rs2659067		Suhre	Wald ratio	1	-0.0467	0.0702	0.506507	0.9544	0.8317	1.0953	missense_variant	MODERATE	KLK7	protein_coding	tolerated(0.61)	benign(0.007)	1.742	0.058125
GRN	rs5848		Emilsson	Wald ratio	1	-0.115	0.173	0.506541	0.891	0.634	1.252	3_prime_UTR_variant	MODIFIER	GRN	protein_coding	-	-	5.788	0.432839
GRN.4992.49.1	rs5848		Sun	Wald ratio	1	-0.066	0.099	0.506541	0.936	0.771	1.137	3_prime_UTR_variant	MODIFIER	GRN	protein_coding	-	-	5.788	0.432839
IL-18	rs5744249		Folkersen	Wald ratio	1	0.082	0.124	0.508122	1.085	0.852	1.383	intron_variant	MODIFIER	IL18	protein_coding	-	-	6.431	0.493008
UBASH3B	rs10502249		Emilsson	Wald ratio	1	0.095	0.144	0.508157	1.1	0.83	1.458	regulatory_region_variant	MODIFIER	-	promoter_flanking_region	-	-	0.803	-0.106848
PDIA6	rs6752558		Emilsson	Wald ratio	1	-0.145	0.218	0.508267	0.865	0.564	1.328	intron_variant	MODIFIER	ATP6V1C2	protein_coding	-	-	0.05	-0.673622
PRTN3.3514.49.2	rs10425544	rs10411119	Sun	Wald ratio	1	0.037	0.057	0.510009	1.038	0.929	1.16
FLT4	rs78183295		Emilsson	Wald ratio	1	-0.089	0.136	0.511155	0.915	0.701	1.194	intron_variant	MODIFIER	CNOT6	protein_coding	-	-	1.731	0.056702
ITIH5	rs12572683		Emilsson	Wald ratio	1	0.09	0.138	0.512676	1.094	0.836	1.433	intron_variant	MODIFIER	ITIH5	protein_coding	-	-	0.623	-0.159474
COL18A1	rs11702494		Emilsson	Wald ratio	1	0.102	0.156	0.51276	1.108	0.815	1.505	intron_variant	MODIFIER	COL18A1	protein_coding	-	-	0.094	-0.548076
CDC25B	rs73084583		Emilsson	Wald ratio	1	-0.159	0.246	0.516807	0.853	0.527	1.38	3_prime_UTR_variant	MODIFIER	RNF24	protein_coding	-	-	2.781	0.169298
PRRG4	rs61889468		Emilsson	Wald ratio	1	-0.128	0.197	0.517018	0.88	0.598	1.295	regulatory_region_variant	MODIFIER	-	promoter_flanking_region	-	-	0.303	-0.305671
FCN3	rs2474283		Emilsson	Wald ratio	1	0.038	0.059	0.519118	1.039	0.925	1.167	upstream_gene_variant	MODIFIER	GPR3	protein_coding	-	-	0.535	-0.190638
PRSS57	rs9304936		Emilsson	Wald ratio	1	0.032	0.049	0.519531	1.032	0.937	1.137	intron_variant	MODIFIER	PRSS57	protein_coding	-	-	2.406	0.133345
PIP	rs4726600		Emilsson	Wald ratio	1	-0.098	0.153	0.520639	0.906	0.671	1.224	downstream_gene_variant	MODIFIER	TAS2R39	protein_coding	-	-	1.538	0.030477
CSF2RB.10512.13.3	rs1534881		Sun	Wald ratio	1	0.047	0.074	0.521506	1.049	0.907	1.213	intron_variant	MODIFIER	CSF2RB	protein_coding	-	-	4.371	0.307063
LGMN	rs7140705		Emilsson	Wald ratio	1	0.093	0.144	0.521635	1.097	0.827	1.456	regulatory_region_variant	MODIFIER	-	open_chromatin_region	-	-	4.419	0.3112
TCN2	rs4820023		Emilsson	Wald ratio	1	-0.028	0.044	0.52185	0.972	0.893	1.059	upstream_gene_variant	MODIFIER	SLC35E4	protein_coding	-	-	5.91	0.444143
APOA1	rs75507001		Emilsson	Wald ratio	1	0.068	0.106	0.522306	1.07	0.869	1.317	intergenic_variant	MODIFIER	-	-	-	-	0.739	-0.124083
ALCAM	rs9825097		Emilsson	Wald ratio	1	0.131	0.205	0.523047	1.14	0.763	1.704	intergenic_variant	MODIFIER	-	-	-	-	20.9	2.20965
IL17RD	rs1463657		Suhre	Wald ratio	1	0.0266	0.0417	0.523388	1.0269	0.9464	1.1143	intron_variant	MODIFIER	IL17RD	protein_coding	-	-	0.384	-0.257255
POFUT1	rs6058523		Emilsson	Wald ratio	1	-0.078	0.122	0.523435	0.925	0.728	1.176	intron_variant	MODIFIER	HCK	protein_coding	-	-	0.02	-0.841429
FRZB	rs72888404		Emilsson	Wald ratio	1	-0.066	0.104	0.523919	0.936	0.763	1.147	intron_variant	MODIFIER	NCKAP1	protein_coding	-	-	1.432	0.015053
LY9	rs540254		Emilsson	Wald ratio	1	0.05	0.078	0.524062	1.051	0.902	1.225	intron_variant	MODIFIER	LY9	protein_coding	-	-	2.497	0.14234
LY9	rs540254		Suhre	Wald ratio	1	0.0379	0.0595	0.524062	1.0386	0.9243	1.167	intron_variant	MODIFIER	LY9	protein_coding	-	-	2.497	0.14234
FGF2	rs308403		Suhre	Wald ratio	1	0.0283	0.0446	0.525441	1.0287	0.9426	1.1226	intron_variant	MODIFIER	FGF2	protein_coding	-	-	3.883	0.265237
EDAR.2977.7.2	rs116475987		Sun	Wald ratio	1	-0.042	0.066	0.527063	0.959	0.843	1.092	intron_variant	MODIFIER	EDAR	protein_coding	-	-	2.393	0.132033
CXCL11	rs4356932		Suhre	Wald ratio	1	-0.045	0.0711	0.527074	0.956	0.8316	1.099	3_prime_UTR_variant	MODIFIER	CXCL11	protein_coding	-	-	4.897	0.352879
CRELD1.7628.40.3	rs7627326	rs3732963	Sun	Wald ratio	1	-0.016	0.025	0.528043	0.984	0.938	1.033
IL17RD	rs59527464		Emilsson	Wald ratio	1	0.046	0.073	0.528362	1.047	0.907	1.208	downstream_gene_variant	MODIFIER	IL17RD	protein_coding	-	-	1.093	-0.042171
NELL1.6544.33.3	rs61652119		Sun	Wald ratio	1	0.029	0.046	0.528465	1.03	0.94	1.127	intron_variant	MODIFIER	NELL1	protein_coding	-	-	2.422	0.134959
CFI	rs10033900		Emilsson	Wald ratio	1	-0.052	0.082	0.529939	0.95	0.809	1.115	intron_variant	MODIFIER	-	protein_coding	-	-	9.428	0.803641
COLEC11	rs3820897		Emilsson	Wald ratio	1	-0.025	0.04	0.530288	0.975	0.902	1.054	upstream_gene_variant	MODIFIER	COLEC11	protein_coding	-	-	7.272	0.575429
SIRPA	rs6075340		Emilsson	Wald ratio	1	0.012	0.019	0.530364	1.012	0.975	1.051	intron_variant	MODIFIER	SIRPA	protein_coding	-	-	0.38	-0.259579
RFESD.13603.7.3	rs77881626		Sun	Wald ratio	1	-0.062	0.1	0.530731	0.939	0.773	1.142	intron_variant	MODIFIER	SPATA9	protein_coding	-	-	0.591	-0.17031
SCARF1	rs62089970		Emilsson	Wald ratio	1	0.033	0.052	0.531232	1.033	0.933	1.144	intron_variant	MODIFIER	PRPF8	protein_coding	-	-	0.332	-0.287143
CLN5	rs7996555		Emilsson	Wald ratio	1	-0.114	0.183	0.532611	0.892	0.623	1.277	upstream_gene_variant	MODIFIER	CLN5	protein_coding	-	-	0.597	-0.168507
ACHE	rs4727469		Emilsson	Wald ratio	1	-0.049	0.079	0.532672	0.952	0.816	1.111	upstream_gene_variant	MODIFIER	RN7SL549P	misc_RNA	-	-	3.202	0.206857
CHST11	rs1650132		Emilsson	Wald ratio	1	-0.068	0.109	0.532672	0.934	0.754	1.157	intron_variant	MODIFIER	CHST11	protein_coding	-	-	1.759	0.060266
CXCL10	rs4859589		Emilsson	Wald ratio	1	0.11	0.176	0.532672	1.116	0.791	1.576	upstream_gene_variant	MODIFIER	CXCL10	protein_coding	-	-	1.399	0.010017
F10	rs1475931		Emilsson	Wald ratio	1	-0.13	0.209	0.535589	0.878	0.583	1.324	intron_variant	MODIFIER	F7	protein_coding	-	-	4.258	0.297337
SCARA5.10419.1.3	rs10866867		Sun	Wald ratio	1	-0.063	0.102	0.538301	0.939	0.768	1.148	intron_variant	MODIFIER	SCARA5	protein_coding	-	-	2.566	0.149103
UNC5C	rs10030217		Emilsson	Wald ratio	1	0.094	0.154	0.539334	1.099	0.813	1.485	intron_variant	MODIFIER	UNC5C	protein_coding	-	-	16.67	1.64646
IL18R1	rs2058622		Suhre	Wald ratio	1	0.0172	0.0281	0.541389	1.0173	0.9627	1.075	intron_variant	MODIFIER	IL18R1	protein_coding	-	-	13.35	1.16489
PKDCC	rs893812		Emilsson	Wald ratio	1	-0.072	0.118	0.542313	0.93	0.738	1.173	regulatory_region_variant	MODIFIER	-	enhancer	-	-	3.03	0.19178
CRISPLD2.5691.2.3	rs12921670		Sun	Wald ratio	1	0.067	0.111	0.545305	1.07	0.86	1.33	intergenic_variant	MODIFIER	-	-	-	-	1.208	-0.021304
DNAJC17.14655.1.3	rs11549914		Sun	Wald ratio	1	0.079	0.131	0.54543	1.082	0.837	1.399
CDK2AP1	rs2510885		Emilsson	Wald ratio	1	0.138	0.228	0.545684	1.148	0.734	1.795	intron_variant	MODIFIER	PITPNM2	protein_coding	-	-	3.498	0.232341
MRC2.3041.55.2	rs146385050		Sun	Wald ratio	1	-0.086	0.144	0.547233	0.917	0.692	1.215	intron_variant	MODIFIER	TLK2	protein_coding	-	-	4.697	0.335334
BCHE	rs62295996		Emilsson	Wald ratio	1	-0.039	0.065	0.548044	0.962	0.847	1.092	intron_variant,non_coding_transcript_variant	MODIFIER	LINC01322	lncRNA	-	-	2.705	0.162286
TGFBI.3283.21.1	rs13159365		Sun	Wald ratio	1	0.032	0.053	0.548506	1.032	0.931	1.144	intron_variant	MODIFIER	TGFBI	protein_coding	-	-	9.761	0.836418
RELT	rs7118982	rs61345051	Emilsson	Wald ratio	1	-0.062	0.104	0.548506	0.94	0.767	1.151
MTRF1L.11134.30.3	rs503366		Sun	Wald ratio	1	0.084	0.14	0.549081	1.088	0.826	1.432	intron_variant	MODIFIER	RGS17	protein_coding	-	-	0.225	-0.367378
DSCAM	rs117342730		Emilsson	Wald ratio	1	-0.164	0.274	0.549227	0.849	0.496	1.451	intron_variant	MODIFIER	DSCAM	protein_coding	-	-	10.22	0.879792
MAPK13.5006.71.1	rs12210904	rs12199702	Sun	Wald ratio	1	-0.061	0.102	0.549536	0.941	0.77	1.149
KLK6	rs268891		Folkersen	Wald ratio	1	0.094	0.157	0.550297	1.098	0.808	1.493	intron_variant	MODIFIER	KLK6	protein_coding	-	-	4.176	0.290309
NMRAL1.13988.67.3	rs11557236		Sun	Wald ratio	1	0.055	0.093	0.550847	1.057	0.881	1.268	missense_variant	MODERATE	NMRAL1	protein_coding	deleterious(0)	benign(0.251)	22.6	2.58231
RARRES2	rs3735167		Emilsson	Wald ratio	1	0.04	0.068	0.551506	1.041	0.912	1.189	upstream_gene_variant	MODIFIER	RARRES2	protein_coding	-	-	1.261	-0.012152
ENO1	rs115579221		Emilsson	Wald ratio	1	0.117	0.198	0.554141	1.124	0.763	1.658	intron_variant	MODIFIER	ENO1	protein_coding	-	-	0.444	-0.22825
ECP	rs147307766		Folkersen	Wald ratio	1	-0.066	0.112	0.555179	0.936	0.751	1.166	intron_variant,non_coding_transcript_variant	MODIFIER	-	lncRNA	-	-	0.375	-0.26255
CXCL1	rs3117604		Folkersen	Wald ratio	1	0.054	0.092	0.555762	1.056	0.881	1.265	upstream_gene_variant	MODIFIER	CXCL1	protein_coding	-	-	1.3	-0.005651
CXCL5	rs450373		Emilsson	Wald ratio	1	0.028	0.049	0.557233	1.029	0.936	1.132	upstream_gene_variant	MODIFIER	PPBP	protein_coding	-	-	0.475	-0.214829
ARG1	rs2781668		Emilsson	Wald ratio	1	0.114	0.194	0.557884	1.12	0.766	1.638	intron_variant	MODIFIER	ARG1	protein_coding	-	-	0.111	-0.513161
ANGPTL1	rs2184464		Emilsson	Wald ratio	1	0.077	0.132	0.558217	1.08	0.834	1.398	intron_variant	MODIFIER	RALGPS2	protein_coding	-	-	0.987	-0.063532
SIGLEC14	rs16982907		Emilsson	Wald ratio	1	0.022	0.038	0.559321	1.022	0.949	1.101	intergenic_variant	MODIFIER	-	-	-	-	0.433	-0.233478
HRSP12	rs57392722		Emilsson	Wald ratio	1	-0.094	0.161	0.560974	0.911	0.664	1.249	intron_variant	MODIFIER	RIDA	protein_coding	-	-	2.205	0.112504
CLMP.10440.26.3	rs35483681		Sun	Wald ratio	1	0.055	0.094	0.561108	1.056	0.879	1.269	intron_variant	MODIFIER	CLMP	protein_coding	-	-	1.694	0.051834
AKR1B1	rs148913805		Emilsson	Wald ratio	1	-0.111	0.191	0.561285	0.895	0.615	1.301
SLAMF6	rs1748512		Emilsson	Wald ratio	1	0.109	0.188	0.56211	1.115	0.772	1.611	intergenic_variant	MODIFIER	-	-	-	-	1.083	-0.044134
LRPAP1.3640.14.3	rs78770234		Sun	Wald ratio	1	0.058	0.099	0.562153	1.059	0.872	1.287	downstream_gene_variant	MODIFIER	DOK7	protein_coding	-	-	0.175	-0.419977
IL17A	rs187698899		Emilsson	Wald ratio	1	0.404	0.698	0.563053	1.498	0.381	5.888
HB-EGF	rs182055959		Folkersen	Wald ratio	1	0.136	0.235	0.563208	1.145	0.723	1.815
PPIE.5238.26.3	rs12086750		Sun	Wald ratio	1	-0.036	0.063	0.564099	0.964	0.853	1.091	intron_variant	MODIFIER	PPIE	protein_coding	-	-	2.791	0.170226
BCHE	rs6445035		Yao	Wald ratio	1	-0.035	0.061	0.564352	0.965	0.856	1.088	intron_variant,non_coding_transcript_variant	MODIFIER	LINC01322	lncRNA	-	-	4.89	0.352262
APCS.2474.54.5	rs71632673		Sun	Wald ratio	1	-0.053	0.093	0.565837	0.948	0.791	1.137	intergenic_variant	MODIFIER	-	-	-	-	0.702	-0.134918
PLA2G2A	rs4744		Emilsson	Wald ratio	1	-0.026	0.046	0.567378	0.974	0.889	1.066	stop_gained	HIGH	PLA2G2A	protein_coding	-	-	33	5.27886
BPI	rs1780617		Emilsson	Wald ratio	1	-0.028	0.048	0.567709	0.973	0.885	1.069	upstream_gene_variant	MODIFIER	LBP	protein_coding	-	-	2.953	0.184923
BPI.4126.22.1	rs1780617		Sun	Wald ratio	1	-0.033	0.058	0.567709	0.968	0.864	1.083	upstream_gene_variant	MODIFIER	LBP	protein_coding	-	-	2.953	0.184923
GNRH2.10708.3.3	rs3787480		Sun	Wald ratio	1	-0.078	0.137	0.567709	0.925	0.707	1.209	intron_variant	MODIFIER	PTPRA	protein_coding	-	-	7.128	0.560984
B4GALT6	rs113222817		Emilsson	Wald ratio	1	0.029	0.05	0.568383	1.029	0.932	1.136	intron_variant	MODIFIER	B4GALT6	protein_coding	-	-	8.637	0.71992
RETN.3046.31.1	rs34124816		Sun	Wald ratio	1	-0.071	0.125	0.568856	0.931	0.729	1.19	upstream_gene_variant	MODIFIER	RETN	protein_coding	-	-	2.506	0.143224
TSG101	rs2305167		Emilsson	Wald ratio	1	0.117	0.207	0.569912	1.125	0.75	1.686	intron_variant	MODIFIER	UEVLD	protein_coding	-	-	0.466	-0.218598
ENPP5.6556.5.3	rs1047153		Sun	Wald ratio	1	0.017	0.031	0.570102	1.018	0.958	1.081	3_prime_UTR_variant	MODIFIER	ENPP5	protein_coding	-	-	7.116	0.559793
SAA1	rs11024616		Emilsson	Wald ratio	1	-0.015	0.027	0.571564	0.985	0.935	1.038	intron_variant	MODIFIER	HPS5	protein_coding	-	-	0.631	-0.157131
SAA1	rs11024616		Yao	Wald ratio	1	-0.032	0.057	0.571564	0.968	0.866	1.083	intron_variant	MODIFIER	HPS5	protein_coding	-	-	0.631	-0.157131
IL6ST	rs10471960	rs6894414	Emilsson	Wald ratio	1	-0.062	0.109	0.571761	0.94	0.758	1.165
DNER	rs35032874		Emilsson	Wald ratio	1	-0.096	0.17	0.571926	0.908	0.65	1.268	intron_variant	MODIFIER	DNER	protein_coding	-	-	1.411	0.011803
DKK3.3607.71.6	rs11022114		Sun	Wald ratio	1	-0.044	0.078	0.572152	0.957	0.821	1.115	regulatory_region_variant	MODIFIER	-	promoter_flanking_region	-	-	6.152	0.46661
CPA4.9267.2.3	rs34587586		Sun	Wald ratio	1	-0.012	0.021	0.57254	0.988	0.949	1.029	missense_variant	MODERATE	CPA4	protein_coding	tolerated(0.47)	benign(0.018)	17.01	1.69814
PREP	rs1051484		Emilsson	Wald ratio	1	0.04	0.072	0.574301	1.041	0.905	1.198	missense_variant	MODERATE	PREP	protein_coding	tolerated(0.5)	benign(0)	18.78	1.93828
POGLUT1	rs115511641		Emilsson	Wald ratio	1	-0.032	0.057	0.574956	0.968	0.866	1.083	upstream_gene_variant	MODIFIER	TIMMDC1	protein_coding	-	-	6.307	0.48119
PPIE	rs9787249		Suhre	Wald ratio	1	-0.0293	0.0524	0.575366	0.9711	0.8763	1.0761	intron_variant	MODIFIER	PPIE	protein_coding	-	-	1.378	0.006657
CLIC5	rs76801943		Emilsson	Wald ratio	1	-0.108	0.193	0.576048	0.898	0.615	1.311	intergenic_variant	MODIFIER	-	-	-	-	0.798	-0.108129
PLD3	rs8103643		Emilsson	Wald ratio	1	-0.127	0.227	0.576749	0.881	0.564	1.375	intron_variant	MODIFIER	C19orf47	protein_coding	-	-	0.306	-0.303799
FCRL6	rs12083967		Emilsson	Wald ratio	1	0.117	0.211	0.578012	1.125	0.743	1.701	synonymous_variant	LOW	FCRL6	protein_coding	-	-	2.234	0.115532
SERPINA12	rs4900236		Emilsson	Wald ratio	1	0.043	0.077	0.578785	1.044	0.897	1.214	intergenic_variant	MODIFIER	-	-	-	-	1.642	0.044954
CNDP1	rs62099911		Emilsson	Wald ratio	1	-0.048	0.086	0.57979	0.953	0.805	1.129	intron_variant	MODIFIER	CNDP1	protein_coding	-	-	2.611	0.153412
ST3GAL6.6947.4.3	rs72934623		Sun	Wald ratio	1	-0.016	0.029	0.580785	0.984	0.931	1.041	intron_variant	MODIFIER	ST3GAL6	protein_coding	-	-	2.056	0.09611
RPIA	rs6707271		Emilsson	Wald ratio	1	-0.109	0.198	0.581039	0.897	0.609	1.321	intron_variant,non_coding_transcript_variant	MODIFIER	-	lncRNA	-	-	0.305	-0.304505
FS	rs31226		Folkersen	Wald ratio	1	-0.101	0.183	0.582031	0.904	0.632	1.294	intron_variant	MODIFIER	ARL15	protein_coding	-	-	0.399	-0.249898
TMEM106A	rs74252763		Emilsson	Wald ratio	1	0.094	0.171	0.582054	1.099	0.786	1.536	TF_binding_site_variant	MODIFIER	-	-	-	-	1.537	0.030415
CXCL16	rs7221871		Yao	Wald ratio	1	0.083	0.151	0.582319	1.087	0.808	1.462	downstream_gene_variant	MODIFIER	MED11	protein_coding	-	-	1.922	0.080529
SMPD1	rs1050239		Emilsson	Wald ratio	1	0.054	0.097	0.582547	1.055	0.872	1.277	missense_variant	MODERATE	SMPD1	protein_coding	tolerated(0.09)	benign(0.202)	19.29	2.00431
NELL1	rs16907058		Emilsson	Wald ratio	1	0.029	0.052	0.582652	1.029	0.929	1.14	intron_variant	MODIFIER	NELL1	protein_coding	-	-	3.322	0.217274
RECQL	rs144436375		Emilsson	Wald ratio	1	0.032	0.058	0.582696	1.033	0.921	1.158	intron_variant	MODIFIER	SLCO1A2	protein_coding	-	-	4.326	0.303189
APCS	rs71628140		Emilsson	Wald ratio	1	-0.061	0.111	0.582889	0.941	0.756	1.17	downstream_gene_variant	MODIFIER	OR10J6P	unprocessed_pseudogene	-	-	3.032	0.191917
TFF1.9185.15.3	rs3761376		Sun	Wald ratio	1	-0.073	0.132	0.58373	0.93	0.717	1.206	upstream_gene_variant	MODIFIER	TFF1	protein_coding	-	-	0.408	-0.245137
TFF1	rs3761376		Emilsson	Wald ratio	1	-0.042	0.077	0.58373	0.958	0.823	1.116	upstream_gene_variant	MODIFIER	TFF1	protein_coding	-	-	0.408	-0.245137
GALP.9398.30.3	rs111265125		Sun	Wald ratio	1	0.086	0.157	0.583841	1.09	0.801	1.482	intron_variant	MODIFIER	GALP	protein_coding	-	-	1.011	-0.058585
VPS24	rs72930400		Emilsson	Wald ratio	1	-0.104	0.192	0.586614	0.901	0.619	1.312	intron_variant	MODIFIER	KDM3A	protein_coding	-	-	5.905	0.44364
DLL1.5349.69.3	rs959025		Sun	Wald ratio	1	-0.069	0.127	0.586985	0.933	0.727	1.197	downstream_gene_variant	MODIFIER	DLL1	protein_coding	-	-	0.911	-0.080367
CCL17	rs9302690		Suhre	Wald ratio	1	-0.0372	0.0686	0.587644	0.9635	0.8423	1.1021	intron_variant	MODIFIER	CCL17	protein_coding	-	-	10.8	0.933594
CCL4L1	rs2687507		Emilsson	Wald ratio	1	0.062	0.114	0.587733	1.064	0.85	1.331	downstream_gene_variant	MODIFIER	CCL4	protein_coding	-	-	0.21	-0.381382
SPON1	rs11023056		Emilsson	Wald ratio	1	-0.063	0.117	0.591626	0.939	0.747	1.181	intron_variant	MODIFIER	SPON1	protein_coding	-	-	7.199	0.568124
BTD	rs13100619		Emilsson	Wald ratio	1	0.02	0.037	0.592578	1.02	0.949	1.096	intron_variant	MODIFIER	COLQ	protein_coding	-	-	1.23	-0.017406
VEGFA.14032.2.3	rs6921438		Sun	Wald ratio	1	-0.018	0.034	0.593609	0.982	0.919	1.05	intergenic_variant	MODIFIER	-	-	-	-	3.557	0.237436
VEGFA.2597.8.3	rs6921438		Sun	Wald ratio	1	-0.03	0.057	0.593609	0.97	0.868	1.084	intergenic_variant	MODIFIER	-	-	-	-	3.557	0.237436
VEGF-A	rs6921438		Folkersen	Wald ratio	1	-0.028	0.053	0.593609	0.972	0.876	1.078	intergenic_variant	MODIFIER	-	-	-	-	3.557	0.237436
RETN	rs34861192		Folkersen	Wald ratio	1	-0.068	0.129	0.595398	0.934	0.725	1.202
IGDCC4	rs8034057		Emilsson	Wald ratio	1	-0.063	0.118	0.597322	0.939	0.745	1.185	intron_variant	MODIFIER	DPP8	protein_coding	-	-	6.736	0.522342
FAM3D.13102.1.3	rs3749290		Sun	Wald ratio	1	0.043	0.081	0.598295	1.044	0.89	1.224	intron_variant	MODIFIER	FAM3D	protein_coding	-	-	1.976	0.086872
FCN2	rs57136797		Emilsson	Wald ratio	1	0.041	0.077	0.598376	1.042	0.895	1.212	intergenic_variant	MODIFIER	-	-	-	-	3.721	0.251465
FCN2.3313.21.2	rs57136797		Sun	Wald ratio	1	0.031	0.059	0.598376	1.032	0.919	1.158	intergenic_variant	MODIFIER	-	-	-	-	3.721	0.251465
PDIA3	rs3110081		Emilsson	Wald ratio	1	0.082	0.157	0.598669	1.086	0.799	1.476	downstream_gene_variant	MODIFIER	CKMT1A	protein_coding	-	-	15.09	1.40179
MAPK14	rs851047		Emilsson	Wald ratio	1	0.122	0.233	0.599583	1.13	0.716	1.784	intron_variant	MODIFIER	SLC26A8	protein_coding	-	-	1.636	0.044151
SEMA3E	rs17284969		Suhre	Wald ratio	1	0.0175	0.0335	0.600503	1.0177	0.953	1.0867	intron_variant	MODIFIER	SEMA3E	protein_coding	-	-	3.199	0.206606
CAMP	rs2017858		Emilsson	Wald ratio	1	-0.119	0.228	0.600966	0.888	0.568	1.387	intergenic_variant	MODIFIER	-	-	-	-	0.243	-0.351714
CA6	rs6697763		Suhre	Wald ratio	1	0.0246	0.0472	0.601731	1.0249	0.9344	1.1242	downstream_gene_variant	MODIFIER	CA6	protein_coding	-	-	0.21	-0.381529
PLXNA1	rs891762		Emilsson	Wald ratio	1	0.073	0.139	0.601852	1.075	0.819	1.412	intron_variant	MODIFIER	PLXNA1	protein_coding	-	-	6.332	0.483545
TNFSF14	rs413141		Emilsson	Wald ratio	1	0.1	0.191	0.602407	1.105	0.76	1.606	downstream_gene_variant	MODIFIER	C3	protein_coding	-	-	1.071	-0.046536
CFI	rs7439493		Suhre	Wald ratio	1	0.0353	0.0681	0.604202	1.0359	0.9065	1.1837	intron_variant	MODIFIER	-	protein_coding	-	-	7.738	0.623384
CREG1.9357.4.3	rs7513428		Sun	Wald ratio	1	0.053	0.103	0.605063	1.055	0.862	1.291	intron_variant	MODIFIER	CREG1	protein_coding	-	-	0.481	-0.211982
RET.3220.40.2	rs2795507		Sun	Wald ratio	1	-0.053	0.104	0.606078	0.948	0.774	1.162	intergenic_variant	MODIFIER	-	-	-	-	0.878	-0.088162
MAPK9	rs2303009		Emilsson	Wald ratio	1	0.11	0.213	0.606209	1.116	0.736	1.693	intron_variant	MODIFIER	GFPT2	protein_coding	-	-	7.082	0.556317
ISG15.14151.4.3	rs1891906		Sun	Wald ratio	1	-0.053	0.104	0.608011	0.948	0.773	1.163	downstream_gene_variant	MODIFIER	ISG15	protein_coding	-	-	2.368	0.129521
ST3GAL1	rs7463447		Emilsson	Wald ratio	1	-0.065	0.126	0.608077	0.937	0.731	1.201	intron_variant	MODIFIER	ST3GAL1	protein_coding	-	-	3.901	0.266812
TGFB1	rs1800470		Emilsson	Wald ratio	1	0.048	0.093	0.608373	1.049	0.873	1.26	missense_variant	MODERATE	TGFB1	protein_coding	tolerated_low_confidence(0.72)	benign(0)	18.07	1.84516
LRP11	rs10872645		Emilsson	Wald ratio	1	0.026	0.05	0.609908	1.026	0.93	1.131	intron_variant	MODIFIER	NUP43	protein_coding	-	-	1.771	0.061804
EGF	rs1860129		Emilsson	Wald ratio	1	0.03	0.058	0.61117	1.03	0.919	1.154	intron_variant	MODIFIER	EGF	protein_coding	-	-	9.512	0.811971
ST3GAL6	rs3796133		Emilsson	Wald ratio	1	-0.015	0.029	0.611187	0.985	0.931	1.043	downstream_gene_variant	MODIFIER	ST3GAL6	protein_coding	-	-	3.715	0.250932
CUZD1	rs10794613		Emilsson	Wald ratio	1	-0.117	0.23	0.611239	0.89	0.567	1.396	intron_variant,non_coding_transcript_variant	MODIFIER	DMBT1L1	transcribed_unitary_pseudogene	-	-	1.689	0.051164
SPINK6	rs10038416	rs10477364	Emilsson	Wald ratio	1	0.016	0.032	0.611621	1.016	0.955	1.081
MPO	rs2680703		Yao	Wald ratio	1	0.074	0.147	0.612971	1.077	0.808	1.436	upstream_gene_variant	MODIFIER	SUPT4H1	protein_coding	-	-	9.791	0.839396
CST7	rs227618		Emilsson	Wald ratio	1	-0.014	0.029	0.613267	0.986	0.932	1.043	upstream_gene_variant	MODIFIER	-	lncRNA	-	-	2.823	0.173167
QSOX2.8397.147.3	rs10858248		Sun	Wald ratio	1	0.041	0.082	0.61345	1.042	0.888	1.223	intron_variant	MODIFIER	QSOX2	protein_coding	-	-	0.445	-0.22765
IGFBP1	rs2453849		Emilsson	Wald ratio	1	0.12	0.238	0.614545	1.127	0.707	1.796	intergenic_variant	MODIFIER	-	-	-	-	0.837	-0.098205
CPB1	rs13318853		Emilsson	Wald ratio	1	-0.055	0.109	0.614563	0.947	0.765	1.172	intron_variant	MODIFIER	CPB1	protein_coding	-	-	2.223	0.11445
MXRA7	rs1558251		Emilsson	Wald ratio	1	-0.04	0.08	0.615603	0.96	0.82	1.124	intron_variant	MODIFIER	MXRA7	protein_coding	-	-	4.015	0.276479
F5	rs6033		Suhre	Wald ratio	1	-0.0269	0.0538	0.617849	0.9735	0.876	1.0819	missense_variant	MODERATE	F5	protein_coding	tolerated(0.71)	benign(0.006)	0.056	-0.652807
FABP4	rs77878271	rs112268552	Folkersen	Wald ratio	1	-0.151	0.304	0.620194	0.86	0.474	1.561
DCBLD2	rs9859042		Emilsson	Wald ratio	1	-0.062	0.125	0.620432	0.94	0.736	1.2	intron_variant,non_coding_transcript_variant	MODIFIER	-	lncRNA	-	-	1.125	-0.036172
TNFSF13B	rs1232641		Emilsson	Wald ratio	1	0.096	0.194	0.620978	1.1	0.753	1.608	intergenic_variant	MODIFIER	-	-	-	-	2.196	0.111473
LGALS9	rs62055780		Emilsson	Wald ratio	1	-0.066	0.134	0.622262	0.936	0.72	1.217	intron_variant	MODIFIER	LGALS9	protein_coding	-	-	0.723	-0.128885
VWF	rs7308002		Emilsson	Wald ratio	1	-0.065	0.133	0.622955	0.937	0.722	1.215	intron_variant	MODIFIER	VWF	protein_coding	-	-	0.206	-0.386056
QDPR.11257.1.3	rs28719835		Sun	Wald ratio	1	-0.023	0.048	0.624863	0.977	0.889	1.073	intron_variant	MODIFIER	CLRN2	protein_coding	-	-	0.098	-0.539602
CDNF	rs72772427		Emilsson	Wald ratio	1	-0.083	0.171	0.625372	0.92	0.658	1.286	intron_variant	MODIFIER	HSPA14	protein_coding	-	-	2.316	0.124151
LRRN1.11586.2.3	rs6801789		Sun	Wald ratio	1	0.048	0.099	0.625759	1.05	0.864	1.275	intron_variant,non_coding_transcript_variant	MODIFIER	SUMF1	processed_transcript	-	-	14.97	1.38408
TGFBI	rs17689879		Emilsson	Wald ratio	1	0.029	0.06	0.626131	1.03	0.915	1.159	intron_variant	MODIFIER	TGFBI	protein_coding	-	-	3.003	0.189391
SELL	rs4987358		Emilsson	Wald ratio	1	-0.035	0.071	0.626198	0.966	0.841	1.11	intron_variant	MODIFIER	SELL	protein_coding	-	-	3.824	0.260216
SELL.4831.4.2	rs4987358		Sun	Wald ratio	1	-0.026	0.052	0.626198	0.975	0.88	1.08	intron_variant	MODIFIER	SELL	protein_coding	-	-	3.824	0.260216
SEMA3E	rs60909458		Emilsson	Wald ratio	1	0.015	0.031	0.626888	1.015	0.956	1.078	intron_variant	MODIFIER	SEMA3E	protein_coding	-	-	1.343	0.001229
CA6	rs3765963		Emilsson	Wald ratio	1	0.023	0.048	0.628477	1.024	0.931	1.125	intron_variant	MODIFIER	CA6	protein_coding	-	-	0.398	-0.250024
HPX	rs7935957		Yao	Wald ratio	1	0.052	0.108	0.628729	1.054	0.852	1.303	downstream_gene_variant	MODIFIER	HPX	protein_coding	-	-	1.01	-0.058792
HGF	rs5745687		Folkersen	Wald ratio	1	0.115	0.238	0.628959	1.122	0.704	1.789	missense_variant	MODERATE	HGF	protein_coding	tolerated(0.57)	benign(0.05)	21.9	2.36838
CD58	rs61789231		Emilsson	Wald ratio	1	-0.126	0.262	0.630258	0.881	0.527	1.474	intron_variant	MODIFIER	CD58	protein_coding	-	-	6.796	0.528156
LRP8	rs10218811		Emilsson	Wald ratio	1	-0.075	0.157	0.630681	0.927	0.682	1.261	downstream_gene_variant	MODIFIER	LINC01771	lncRNA	-	-	3.7	0.249638
CBLN4.5688.65.3	rs74447607		Sun	Wald ratio	1	-0.065	0.135	0.631518	0.937	0.719	1.221	intergenic_variant	MODIFIER	-	-	-	-	5.26	0.385075
FCER2	rs11260013		Suhre	Wald ratio	1	-0.0378	0.079	0.632106	0.9629	0.8248	1.1241	intron_variant	MODIFIER	FCER2	protein_coding	-	-	1.82	0.068041
SPINT3	rs13042504		Emilsson	Wald ratio	1	0.039	0.081	0.6322	1.04	0.887	1.219	downstream_gene_variant	MODIFIER	SPINT3	protein_coding	-	-	1.525	0.02863
CCL18	rs9904601		Suhre	Wald ratio	1	0.0206	0.0433	0.63412	1.0208	0.9377	1.1113	intergenic_variant	MODIFIER	-	-	-	-	2.083	0.099121
CCL3	rs9904601		Suhre	Wald ratio	1	0.0312	0.0655	0.63412	1.0317	0.9074	1.173	intergenic_variant	MODIFIER	-	-	-	-	2.083	0.099121
MAPK13	rs10447396		Emilsson	Wald ratio	1	-0.063	0.133	0.634719	0.939	0.723	1.219	downstream_gene_variant	MODIFIER	MAPK13	protein_coding	-	-	0.765	-0.116928
MST1	rs9852529		Emilsson	Wald ratio	1	0.009	0.019	0.634995	1.009	0.972	1.048	intron_variant	MODIFIER	RNF123	protein_coding	-	-	0.934	-0.075125
PRSS22	rs7204669		Emilsson	Wald ratio	1	-0.047	0.098	0.635136	0.954	0.787	1.157	upstream_gene_variant	MODIFIER	PRSS22	protein_coding	-	-	0.096	-0.544488
CST7	rs6138458		Suhre	Wald ratio	1	-0.0172	0.0363	0.636267	0.983	0.9155	1.0555	upstream_gene_variant	MODIFIER	APMAP	protein_coding	-	-	0.656	-0.148916
FSTL1.13112.179.3	rs1147707		Sun	Wald ratio	1	-0.056	0.119	0.636768	0.945	0.748	1.194	intron_variant	MODIFIER	FSTL1	protein_coding	-	-	13.33	1.16177
FSTL1	rs1147707		Emilsson	Wald ratio	1	-0.043	0.091	0.636768	0.958	0.801	1.145	intron_variant	MODIFIER	FSTL1	protein_coding	-	-	13.33	1.16177
CPM.7768.10.3	rs1908671		Sun	Wald ratio	1	-0.067	0.143	0.638409	0.935	0.706	1.238	regulatory_region_variant	MODIFIER	-	promoter_flanking_region	-	-	0.174	-0.420432
LCT	rs4988235		Emilsson	Wald ratio	1	0.013	0.029	0.643819	1.013	0.958	1.073	intron_variant	MODIFIER	MCM6	protein_coding	-	-	11.13	0.96066
LCT.9017.58.3	rs4988235		Sun	Wald ratio	1	0.017	0.036	0.643819	1.017	0.948	1.091	intron_variant	MODIFIER	MCM6	protein_coding	-	-	11.13	0.96066
CHST6	rs8051241		Emilsson	Wald ratio	1	0.099	0.214	0.645326	1.104	0.725	1.679	intron_variant,non_coding_transcript_variant	MODIFIER	-	lncRNA	-	-	0.02	-0.83995
SIGLEC9	rs1039405		Emilsson	Wald ratio	1	0.011	0.023	0.645462	1.011	0.966	1.057	upstream_gene_variant	MODIFIER	SIGLEC9	protein_coding	-	-	5.237	0.383027
EDAR	rs141332418		Emilsson	Wald ratio	1	-0.023	0.05	0.645488	0.977	0.885	1.078	upstream_gene_variant	MODIFIER	EDAR	protein_coding	-	-	0.372	-0.263777
SPARCL1	rs4693167		Suhre	Wald ratio	1	0.0166	0.0362	0.645983	1.0168	0.9472	1.0915	intron_variant	MODIFIER	SPARCL1	protein_coding	-	-	3.036	0.192254
SPON1.4297.62.3	rs10832169		Sun	Wald ratio	1	-0.028	0.062	0.647745	0.972	0.861	1.098	intron_variant	MODIFIER	SPON1	protein_coding	-	-	2.62	0.154255
SPON1	rs10832169		Suhre	Wald ratio	1	-0.0294	0.0643	0.647745	0.9711	0.8561	1.1014	intron_variant	MODIFIER	SPON1	protein_coding	-	-	2.62	0.154255
DCBLD2.9338.2.3	rs9864010		Sun	Wald ratio	1	-0.039	0.085	0.648074	0.962	0.814	1.137	intron_variant,non_coding_transcript_variant	MODIFIER	-	lncRNA	-	-	3.132	0.200705
ENPP5	rs62400860		Emilsson	Wald ratio	1	-0.014	0.031	0.64918	0.986	0.927	1.048	intron_variant,non_coding_transcript_variant	MODIFIER	-	lncRNA	-	-	9.959	0.85556
LRIG3.3322.52.2	rs11172791		Sun	Wald ratio	1	0.056	0.122	0.649205	1.057	0.832	1.343	intron_variant	MODIFIER	LRIG3	protein_coding	-	-	10.95	0.945789
SECTM1.13093.6.3	rs4789763		Sun	Wald ratio	1	-0.043	0.094	0.649436	0.958	0.797	1.152	intron_variant	MODIFIER	SECTM1	protein_coding	-	-	1.514	0.027012
CA13	rs13259464		Emilsson	Wald ratio	1	-0.087	0.192	0.65212	0.917	0.629	1.336	upstream_gene_variant	MODIFIER	CA13	protein_coding	-	-	0.806	-0.105882
MMP3	rs575027	rs4754884	Emilsson	Wald ratio	1	-0.04	0.09	0.653635	0.96	0.805	1.146
SERPING1	rs11229080		Emilsson	Wald ratio	1	0.012	0.026	0.655486	1.012	0.961	1.065	intergenic_variant	MODIFIER	-	-	-	-	2.206	0.112623
ADGRF5	rs611779		Emilsson	Wald ratio	1	0.017	0.038	0.657381	1.017	0.944	1.096	synonymous_variant	LOW	ADGRF5	protein_coding	-	-	0.878	-0.087993
NID1	rs72765466		Emilsson	Wald ratio	1	0.055	0.124	0.657576	1.057	0.828	1.348	intron_variant	MODIFIER	NID1	protein_coding	-	-	0.215	-0.377218
MATN4.7083.74.3	rs11697677		Sun	Wald ratio	1	0.052	0.118	0.657907	1.054	0.836	1.328	intron_variant	MODIFIER	MATN4	protein_coding	-	-	2.437	0.136447
SVEP1.11109.56.3	rs61751937		Sun	Wald ratio	1	0.029	0.066	0.658782	1.03	0.904	1.173	missense_variant	MODERATE	SVEP1	protein_coding	deleterious(0.01)	probably_damaging(0.959)	27.6	4.08004
SVEP1.11178.21.3	rs61751937		Sun	Wald ratio	1	0.026	0.059	0.658782	1.026	0.914	1.153	missense_variant	MODERATE	SVEP1	protein_coding	deleterious(0.01)	probably_damaging(0.959)	27.6	4.08004
PLAUR	rs2302524		Emilsson	Wald ratio	1	0.065	0.147	0.660206	1.067	0.8	1.422	missense_variant	MODERATE	PLAUR	protein_coding	deleterious(0)	benign(0.026)	23.6	3.09771
U-PAR	rs2302524		Folkersen	Wald ratio	1	0.101	0.231	0.660206	1.107	0.704	1.74	missense_variant	MODERATE	PLAUR	protein_coding	deleterious(0)	benign(0.026)	23.6	3.09771
CCL17	rs16956811		Emilsson	Wald ratio	1	-0.036	0.082	0.660274	0.965	0.821	1.133	intron_variant	MODIFIER	CCL17	protein_coding	-	-	12.12	1.04002
PLA2G2A	rs17354650		Suhre	Wald ratio	1	-0.0329	0.075	0.66124	0.9677	0.8354	1.1209	intron_variant,non_coding_transcript_variant	MODIFIER	PLA2G5	processed_transcript	-	-	1.474	0.021307
KDR	rs2305948		Emilsson	Wald ratio	1	-0.04	0.091	0.662956	0.961	0.804	1.149	missense_variant	MODERATE	KDR	protein_coding	deleterious(0)	probably_damaging(0.999)	23.1	2.83572
PDLIM4	rs6864922		Emilsson	Wald ratio	1	-0.026	0.059	0.663562	0.975	0.868	1.094	intron_variant,non_coding_transcript_variant	MODIFIER	P4HA2	processed_transcript	-	-	4.746	0.339613
NOTUM	rs114341171		Emilsson	Wald ratio	1	-0.131	0.302	0.664076	0.877	0.486	1.584	intron_variant	MODIFIER	ASPSCR1	protein_coding	-	-	4.001	0.275284
EBI3	rs10409421		Emilsson	Wald ratio	1	-0.011	0.025	0.66421	0.989	0.943	1.038	intron_variant	MODIFIER	YJU2	protein_coding	-	-	2.178	0.109577
MAN2B2	rs17724993		Emilsson	Wald ratio	1	-0.032	0.075	0.66421	0.968	0.837	1.121	intron_variant	MODIFIER	MAN2B2	protein_coding	-	-	3.977	0.273267
ANXA1	rs4745216		Suhre	Wald ratio	1	0.0361	0.0832	0.664358	1.0368	0.8808	1.2203	intergenic_variant	MODIFIER	-	-	-	-	0.276	-0.324758
PON1	rs2237582		Yao	Wald ratio	1	0.013	0.03	0.666198	1.013	0.955	1.075	intron_variant	MODIFIER	PON1	protein_coding	-	-	0.028	-0.783088
CHL1.3601.54.3	rs1015456		Sun	Wald ratio	1	-0.049	0.115	0.667802	0.952	0.759	1.193	intergenic_variant	MODIFIER	-	-	-	-	0.955	-0.070501
ENTPD5	rs17094448		Emilsson	Wald ratio	1	0.02	0.047	0.668235	1.02	0.93	1.119	intron_variant	MODIFIER	ENTPD5	protein_coding	-	-	8.355	0.689121
ENTPD5	rs17094448		Suhre	Wald ratio	1	0.0166	0.0387	0.668235	1.0167	0.9425	1.0968	intron_variant	MODIFIER	ENTPD5	protein_coding	-	-	8.355	0.689121
THSD1.5621.64.3	rs41292808		Sun	Wald ratio	1	-0.035	0.082	0.668797	0.966	0.823	1.134	missense_variant	MODERATE	THSD1	protein_coding	tolerated(0.06)	benign(0.014)	13.86	1.22846
PAPPA	rs17372936		Folkersen	Wald ratio	1	0.128	0.299	0.669346	1.136	0.632	2.041	intron_variant	MODIFIER	PAPPA	protein_coding	-	-	5.9	0.44322
KLRK1	rs2255336		Suhre	Wald ratio	1	-0.0313	0.0737	0.670713	0.9692	0.8388	1.1197	missense_variant	MODERATE	KLRK1	protein_coding	tolerated(0.33)	benign(0.013)	0.495	-0.206337
NPPB	rs549596		Emilsson	Wald ratio	1	-0.064	0.152	0.670763	0.938	0.697	1.262	downstream_gene_variant	MODIFIER	NPPB	protein_coding	-	-	1.493	0.023955
FSTL3	rs61622571		Emilsson	Wald ratio	1	-0.122	0.287	0.670888	0.885	0.504	1.554	downstream_gene_variant	MODIFIER	FSTL3	protein_coding	-	-	1.114	-0.038314
DEFB1	rs2741120		Emilsson	Wald ratio	1	0.026	0.061	0.671296	1.026	0.911	1.156	downstream_gene_variant	MODIFIER	DEFB1	protein_coding	-	-	4.738	0.338959
CFH	rs10737680, rs35908703		Suhre	Inverse varianc	2	0.0185	0.0438	0.672518	1.0187	0.9349	1.1099
TYRO3	rs2289743		Emilsson	Wald ratio	1	0.067	0.159	0.673116	1.069	0.783	1.46	intron_variant	MODIFIER	TYRO3	protein_coding	-	-	6.407	0.490694
EGF	rs2237045		Folkersen	Wald ratio	1	-0.079	0.188	0.674187	0.924	0.639	1.337	intron_variant	MODIFIER	EGF	protein_coding	-	-	1.534	0.029874
PPIE	rs1046988		Emilsson	Wald ratio	1	-0.039	0.093	0.674666	0.962	0.801	1.155	3_prime_UTR_variant	MODIFIER	PPIE	protein_coding	-	-	5.845	0.438133
FOXO3	rs79044525		Emilsson	Wald ratio	1	0.072	0.173	0.67558	1.075	0.766	1.509	intron_variant,non_coding_transcript_variant	MODIFIER	LINC00222	lncRNA	-	-	2.986	0.187851
RNASE2	rs7142386		Emilsson	Wald ratio	1	0.039	0.092	0.675923	1.039	0.867	1.246	downstream_gene_variant	MODIFIER	RN7SL189P	misc_RNA	-	-	6.838	0.532304
C7	rs429017		Suhre	Wald ratio	1	0.0252	0.0603	0.676222	1.0255	0.9112	1.1541	upstream_gene_variant	MODIFIER	C6	protein_coding	-	-	2.851	0.175713
SEMA5A	rs16883128		Emilsson	Wald ratio	1	-0.011	0.027	0.676427	0.989	0.939	1.042	upstream_gene_variant	MODIFIER	SEMA5A	protein_coding	-	-	0.064	-0.62685
AGRP	rs28526086		Emilsson	Wald ratio	1	-0.047	0.113	0.677901	0.954	0.765	1.19	intron_variant	MODIFIER	LRRC36	protein_coding	-	-	0.128	-0.485204
QDPR	rs28458311		Emilsson	Wald ratio	1	-0.041	0.099	0.678933	0.96	0.791	1.165	intron_variant	MODIFIER	CLRN2	protein_coding	-	-	2.562	0.148727
IL12RB1	rs376008		Suhre	Wald ratio	1	0.0139	0.0336	0.679324	1.014	0.9494	1.0829	intron_variant	MODIFIER	IL12RB1	protein_coding	-	-	1.191	-0.024221
BOC	rs73235147		Emilsson	Wald ratio	1	0.052	0.127	0.679523	1.054	0.822	1.35	intron_variant	MODIFIER	BOC	protein_coding	-	-	1.779	0.062831
VTI1B	rs7149221		Emilsson	Wald ratio	1	-0.086	0.21	0.680651	0.917	0.608	1.385	intron_variant	MODIFIER	RDH12	protein_coding	-	-	3.94	0.270086
CD200	rs6808365		Emilsson	Wald ratio	1	0.049	0.118	0.680668	1.05	0.833	1.323	intron_variant,non_coding_transcript_variant	MODIFIER	-	lncRNA	-	-	1.807	0.066396
TXNRD1	rs7306771		Emilsson	Wald ratio	1	0.087	0.211	0.680689	1.091	0.721	1.651	intron_variant	MODIFIER	HCFC2	protein_coding	-	-	3.513	0.233664
GDF15	rs35911336		Yao	Wald ratio	1	-0.029	0.071	0.681926	0.971	0.846	1.116	downstream_gene_variant	MODIFIER	PGPEP1	protein_coding	-	-	0.639	-0.154371
NRXN3	rs2370901		Emilsson	Wald ratio	1	-0.053	0.129	0.681926	0.948	0.736	1.222	intron_variant	MODIFIER	NRXN3	protein_coding	-	-	0.185	-0.407691
MATN4	rs11086957		Emilsson	Wald ratio	1	0.039	0.094	0.682104	1.039	0.864	1.25	intron_variant	MODIFIER	MATN4	protein_coding	-	-	2.637	0.155861
MMP7	rs11568819		Emilsson	Wald ratio	1	-0.041	0.1	0.682406	0.96	0.789	1.167	upstream_gene_variant	MODIFIER	MMP7	protein_coding	-	-	4.255	0.29709
MMP7	rs11568819		Suhre	Wald ratio	1	-0.0307	0.075	0.682406	0.9698	0.8372	1.1233	upstream_gene_variant	MODIFIER	MMP7	protein_coding	-	-	4.255	0.29709
MMP-7	rs11568819		Folkersen	Wald ratio	1	-0.037	0.089	0.682406	0.964	0.809	1.149	upstream_gene_variant	MODIFIER	MMP7	protein_coding	-	-	4.255	0.29709
SCUBE1	rs2744874		Emilsson	Wald ratio	1	-0.053	0.13	0.682473	0.948	0.734	1.224	intron_variant	MODIFIER	SCUBE1	protein_coding	-	-	2.654	0.157498
PLG	rs783150		Suhre	Wald ratio	1	-0.028	0.0689	0.683785	0.9723	0.8496	1.1128	intergenic_variant	MODIFIER	-	-	-	-	3.686	0.248424
MINPP1	rs11202439		Emilsson	Wald ratio	1	0.053	0.131	0.684755	1.055	0.815	1.365	intron_variant	MODIFIER	MINPP1	protein_coding	-	-	1.167	-0.02842
AGRP	rs7184253		Suhre	Wald ratio	1	-0.0278	0.0685	0.684967	0.9726	0.8505	1.1123	intron_variant	MODIFIER	LRRC36	protein_coding	-	-	20.8	2.19183
GAPDH	rs10849478		Emilsson	Wald ratio	1	-0.071	0.175	0.686629	0.932	0.661	1.313	intron_variant	MODIFIER	NCAPD2	protein_coding	-	-	0.398	-0.250163
NBL1	rs12408663		Emilsson	Wald ratio	1	0.081	0.203	0.689157	1.085	0.728	1.616	upstream_gene_variant	MODIFIER	NBL1	protein_coding	-	-	6.544	0.503779
IL5RA	rs2290610	rs7619345	Suhre	Wald ratio	1	0.0209	0.0524	0.690308	1.0211	0.9215	1.1314
TIE1.2844.53.2	rs2275180		Sun	Wald ratio	1	-0.038	0.095	0.690379	0.963	0.799	1.16	intron_variant	MODIFIER	TIE1	protein_coding	-	-	6.236	0.474505
POGLUT1.6467.65.3	rs75203710		Sun	Wald ratio	1	-0.049	0.124	0.690969	0.952	0.746	1.214	intron_variant	MODIFIER	ARHGAP31	protein_coding	-	-	0.238	-0.355891
SEMG1	rs1005283		Emilsson	Wald ratio	1	-0.09	0.228	0.691006	0.913	0.585	1.427	upstream_gene_variant	MODIFIER	SDC4	protein_coding	-	-	1.542	0.031112
EFNB2	rs12427554		Emilsson	Wald ratio	1	-0.094	0.236	0.691938	0.911	0.573	1.447	intron_variant,non_coding_transcript_variant	MODIFIER	LINC00551	lncRNA	-	-	0.365	-0.267764
PGLYRP1.3329.14.2	rs8102493		Sun	Wald ratio	1	-0.049	0.125	0.694037	0.952	0.744	1.217	upstream_gene_variant	MODIFIER	PGLYRP1	protein_coding	-	-	4.426	0.311828
MPO	rs34097845		Folkersen	Wald ratio	1	0.061	0.156	0.69428	1.063	0.783	1.444	upstream_gene_variant	MODIFIER	MPO	protein_coding	-	-	6.568	0.506057
MPO.2580.83.2	rs34097845		Sun	Wald ratio	1	0.037	0.095	0.69428	1.038	0.861	1.252	upstream_gene_variant	MODIFIER	MPO	protein_coding	-	-	6.568	0.506057
EGF.5509.7.3	rs11568972		Sun	Wald ratio	1	-0.037	0.093	0.694532	0.964	0.803	1.157	intron_variant	MODIFIER	EGF	protein_coding	-	-	2.627	0.154893
TAPBPL.6364.7.3	rs2532497		Sun	Wald ratio	1	-0.008	0.021	0.695213	0.992	0.951	1.034	intron_variant	MODIFIER	TAPBPL	protein_coding	-	-	0.728	-0.127354
EFEMP1	rs59985551		Yao	Wald ratio	1	-0.048	0.123	0.695572	0.953	0.748	1.213	intron_variant	MODIFIER	EFEMP1	protein_coding	-	-	5.908	0.443895
CBLN1	rs41214		Emilsson	Wald ratio	1	-0.069	0.176	0.695942	0.933	0.661	1.319	intron_variant,non_coding_transcript_variant	MODIFIER	-	lncRNA	-	-	1.411	0.011869
GMP140	rs9332575		Yao	Wald ratio	1	-0.025	0.064	0.696537	0.975	0.86	1.106	intron_variant	MODIFIER	F5	protein_coding	-	-	8.769	0.734362
ESAM.2981.9.3	rs11219769		Sun	Wald ratio	1	0.044	0.114	0.696897	1.045	0.837	1.306	downstream_gene_variant	MODIFIER	ESAM	protein_coding	-	-	0.192	-0.399882
ESAM	rs11219769		Suhre	Wald ratio	1	0.031	0.0797	0.696897	1.0315	0.8823	1.2059	downstream_gene_variant	MODIFIER	ESAM	protein_coding	-	-	0.192	-0.399882
F7	rs776905		Suhre	Wald ratio	1	0.0145	0.0373	0.697757	1.0146	0.943	1.0916	intron_variant	MODIFIER	F10	protein_coding	-	-	0.616	-0.161871
SFRP4	rs75474297		Emilsson	Wald ratio	1	-0.046	0.119	0.698618	0.955	0.757	1.206	intron_variant	MODIFIER	EPDR1	protein_coding	-	-	13.71	1.20986
DSC2.13126.52.3	rs1789063		Sun	Wald ratio	1	-0.051	0.132	0.699523	0.95	0.734	1.231	intron_variant	MODIFIER	DSC2	protein_coding	-	-	1.803	0.065879
CLPS	rs9380535	rs2766588	Emilsson	Wald ratio	1	-0.02	0.051	0.700055	0.981	0.888	1.083
HNRNPAB	rs72820961		Emilsson	Wald ratio	1	-0.072	0.187	0.700077	0.931	0.645	1.342
TLR4 LY96	rs4986791		Suhre	Wald ratio	1	0.0151	0.0392	0.700752	1.0152	0.9402	1.0962	missense_variant	MODERATE	TLR4	protein_coding	deleterious(0.02)	benign(0.052)	2.609	0.153162
PLEKHA7.12731.12.3	rs382280		Sun	Wald ratio	1	-0.051	0.132	0.70208	0.951	0.734	1.232	intron_variant	MODIFIER	PLEKHA7	protein_coding	-	-	1.166	-0.028692
COLEC11	rs7588285		Suhre	Wald ratio	1	-0.0186	0.0489	0.703859	0.9816	0.8918	1.0804	intron_variant	MODIFIER	COLEC11	protein_coding	-	-	1.139	-0.033655
CXCL6	rs16850073		Suhre	Wald ratio	1	-0.0108	0.0287	0.706567	0.9892	0.9351	1.0465	3_prime_UTR_variant	MODIFIER	CXCL6	protein_coding	-	-	11.35	0.978376
CXCL6	rs16850073		Folkersen	Wald ratio	1	-0.018	0.048	0.706567	0.982	0.894	1.079	3_prime_UTR_variant	MODIFIER	CXCL6	protein_coding	-	-	11.35	0.978376
PlGF	rs175510		Folkersen	Wald ratio	1	-0.08	0.213	0.706866	0.923	0.608	1.401	intron_variant	MODIFIER	ACYP1	protein_coding	-	-	9.959	0.855637
IL23R	rs111379368		Emilsson	Wald ratio	1	0.048	0.129	0.707262	1.05	0.815	1.351	upstream_gene_variant	MODIFIER	RNU4ATAC4P	snRNA	-	-	1.011	-0.058486
LRRTM2	rs6862845		Emilsson	Wald ratio	1	0.084	0.225	0.70766	1.088	0.701	1.689	downstream_gene_variant	MODIFIER	CTNNA1	protein_coding	-	-	5.332	0.391455
QPCTL	rs7256197		Emilsson	Wald ratio	1	0.045	0.12	0.708311	1.046	0.826	1.324	intron_variant	MODIFIER	QPCTL	protein_coding	-	-	3.432	0.226721
UGT1A6	rs111741722	rs929596	Emilsson	Wald ratio	1	0.038	0.101	0.709048	1.038	0.852	1.266
CFHR5	rs6695321		Suhre	Wald ratio	1	-0.0214	0.0577	0.710762	0.9788	0.8742	1.096	intron_variant	MODIFIER	CFH	protein_coding	-	-	4.058	0.280184
PEAR1.8275.31.3	rs12137505		Sun	Wald ratio	1	-0.042	0.113	0.710997	0.959	0.769	1.196	missense_variant	MODERATE	PEAR1	protein_coding	tolerated(0.16)	benign(0.015)	8.232	0.675884
AGT	rs2493151		Suhre	Wald ratio	1	-0.0316	0.0857	0.711876	0.9689	0.8191	1.146	upstream_gene_variant	MODIFIER	CAPN9	protein_coding	-	-	0.968	-0.067539
DSG2	rs2212617	rs2212618	Emilsson	Wald ratio	1	-0.065	0.176	0.711908	0.937	0.664	1.323
GABARAPL2	rs12449192		Emilsson	Wald ratio	1	-0.065	0.176	0.712238	0.937	0.664	1.322	downstream_gene_variant	MODIFIER	GABARAPL2	protein_coding	-	-	0.289	-0.315259
FAIM	rs641320		Emilsson	Wald ratio	1	-0.066	0.179	0.712723	0.936	0.659	1.33	missense_variant	MODERATE	FAIM	protein_coding	tolerated(1)	benign(0)	20.9	2.20367
QSOX1.6217.23.3	rs12371		Sun	Wald ratio	1	0.023	0.064	0.71492	1.024	0.903	1.161	missense_variant	MODERATE	QSOX1	protein_coding	tolerated(1)	benign(0)	0.953	-0.07091
HK2	rs6732614		Emilsson	Wald ratio	1	-0.081	0.222	0.715331	0.922	0.597	1.424	intron_variant	MODIFIER	HK2	protein_coding	-	-	4.805	0.344773
TNF-R2	rs5746026		Folkersen	Wald ratio	1	0.062	0.171	0.715399	1.064	0.761	1.488	missense_variant	MODERATE	TNFRSF1B	protein_coding	tolerated(0.18)	benign(0.01)	14.89	1.37176
C1QTNF5	rs2511847		Emilsson	Wald ratio	1	-0.045	0.123	0.715761	0.956	0.751	1.218	upstream_gene_variant	MODIFIER	RNF26	protein_coding	-	-	13.06	1.13094
RTN4R	rs701447		Emilsson	Wald ratio	1	-0.037	0.102	0.71613	0.964	0.79	1.176	intergenic_variant	MODIFIER	-	-	-	-	3.733	0.252447
NOTCH3	rs4808238		Emilsson	Wald ratio	1	0.085	0.234	0.717146	1.088	0.689	1.72	intron_variant	MODIFIER	NOTCH3	protein_coding	-	-	0.787	-0.110924
GDF15.4374.45.2	rs45543339		Sun	Wald ratio	1	0.019	0.053	0.71747	1.019	0.919	1.13	intron_variant	MODIFIER	LRRC25	protein_coding	-	-	0.602	-0.1667
GDF15	rs45543339		Emilsson	Wald ratio	1	0.024	0.068	0.71747	1.025	0.898	1.17	intron_variant	MODIFIER	LRRC25	protein_coding	-	-	0.602	-0.1667
BPIFA2	rs141715080		Emilsson	Wald ratio	1	-0.062	0.172	0.717876	0.94	0.67	1.317	intergenic_variant	MODIFIER	-	-	-	-	0.771	-0.115334
APOBEC3G	rs738469		Emilsson	Wald ratio	1	-0.06	0.166	0.717965	0.942	0.68	1.304	intergenic_variant	MODIFIER	-	-	-	-	3.664	0.246536
MET	rs7457973		Emilsson	Wald ratio	1	0.077	0.214	0.719076	1.08	0.71	1.644	upstream_gene_variant	MODIFIER	RNA5SP239	rRNA_pseudogene	-	-	0.402	-0.24845
IDO1.9759.13.3	rs7010461		Sun	Wald ratio	1	0.037	0.102	0.719315	1.037	0.849	1.268	intron_variant	MODIFIER	IDO1	protein_coding	-	-	0.343	-0.280564
APOE	rs7412		Emilsson	Wald ratio	1	-0.02	0.057	0.72122	0.98	0.876	1.096	missense_variant	MODERATE	APOE	protein_coding	deleterious(0)	probably_damaging(1)	26	3.83249
ASPN.6451.64.3	rs2516568		Sun	Wald ratio	1	0.019	0.052	0.72271	1.019	0.919	1.129	intron_variant	MODIFIER	CENPP	protein_coding	-	-	13.13	1.13829
DCN	rs55887639	rs13312816	Emilsson	Wald ratio	1	0.063	0.177	0.722916	1.065	0.753	1.507
CD274	rs1411262		Emilsson	Wald ratio	1	0.031	0.086	0.722981	1.031	0.87	1.222	intron_variant	MODIFIER	CD274	protein_coding	-	-	4.786	0.343138
PDGFRL	rs2517158		Emilsson	Wald ratio	1	0.075	0.213	0.723042	1.078	0.711	1.637	intron_variant	MODIFIER	PDGFRL	protein_coding	-	-	2.903	0.180377
HPSE	rs11732810		Emilsson	Wald ratio	1	-0.018	0.052	0.724603	0.982	0.887	1.087	intron_variant	MODIFIER	HPSE	protein_coding	-	-	1.196	-0.023313
DSG2.9484.75.3	rs2704050		Sun	Wald ratio	1	0.049	0.14	0.72618	1.05	0.798	1.383	intron_variant	MODIFIER	DSG2	protein_coding	-	-	6.142	0.465664
GSN	rs76331566		Emilsson	Wald ratio	1	0.046	0.132	0.726481	1.047	0.808	1.357	intron_variant	MODIFIER	GSN	protein_coding	-	-	4.199	0.292246
KREMEN1	rs35755679		Emilsson	Wald ratio	1	-0.076	0.217	0.727319	0.927	0.606	1.419	intergenic_variant	MODIFIER	-	-	-	-	0.932	-0.075476
HBZ	rs2541638		Emilsson	Wald ratio	1	0.052	0.148	0.727345	1.053	0.787	1.408	downstream_gene_variant	MODIFIER	HBZ	protein_coding	-	-	2.323	0.124918
CLMP	rs7941947		Emilsson	Wald ratio	1	-0.033	0.096	0.72784	0.967	0.802	1.167	intron_variant	MODIFIER	CLMP	protein_coding	-	-	2.451	0.137797
ESAM.7841.84.3	rs61753651		Sun	Wald ratio	1	-0.043	0.126	0.728969	0.957	0.749	1.224	missense_variant	MODERATE	ESAM	protein_coding	tolerated(0.1)	benign(0.019)	18.47	1.89791
SPINT3.7926.13.3	rs6017591		Sun	Wald ratio	1	0.015	0.043	0.729227	1.015	0.933	1.104	downstream_gene_variant	MODIFIER	SPINT3	protein_coding	-	-	8.002	0.651218
PTGR1	rs112140014		Emilsson	Wald ratio	1	-0.026	0.076	0.729383	0.974	0.838	1.131	intron_variant	MODIFIER	PTGR1	protein_coding	-	-	1.466	0.020124
HSP90B1.6393.63.3	rs1165693		Sun	Wald ratio	1	-0.008	0.023	0.730021	0.992	0.948	1.038	intron_variant	MODIFIER	HSP90B1	protein_coding	-	-	1.347	0.001884
SOD3.8463.2.3	rs1799895		Sun	Wald ratio	1	0.017	0.048	0.730527	1.017	0.925	1.118
SPARCL1	rs7681694		Emilsson	Wald ratio	1	-0.019	0.054	0.730846	0.982	0.883	1.092	regulatory_region_variant	MODIFIER	-	promoter_flanking_region	-	-	0.895	-0.084037
SPARCL1.4467.49.2	rs7681694		Sun	Wald ratio	1	-0.016	0.047	0.730846	0.984	0.897	1.079	regulatory_region_variant	MODIFIER	-	promoter_flanking_region	-	-	0.895	-0.084037
SERPING1	rs11603020		Suhre	Wald ratio	1	-0.0095	0.0277	0.731125	0.9905	0.9382	1.0457	intron_variant	MODIFIER	SERPING1	protein_coding	-	-	9.651	0.82566
ITIH3	rs2535627		Emilsson	Wald ratio	1	0.022	0.065	0.732522	1.022	0.901	1.161	downstream_gene_variant	MODIFIER	ITIH3	protein_coding	-	-	4.286	0.29975
GP1BA	rs72835070		Emilsson	Wald ratio	1	0.043	0.127	0.732587	1.044	0.814	1.339	intron_variant	MODIFIER	CHRNE	protein_coding	-	-	0.102	-0.531976
TF	rs4854760		Emilsson	Wald ratio	1	-0.037	0.11	0.732828	0.963	0.777	1.194	3_prime_UTR_variant	MODIFIER	TF	protein_coding	-	-	3.748	0.253764
CASP-8	rs35550815		Folkersen	Wald ratio	1	0.061	0.18	0.734473	1.063	0.747	1.513	downstream_gene_variant	MODIFIER	FLACC1	protein_coding	-	-	5.938	0.446669
RELT.5115.31.3	rs7952686		Sun	Wald ratio	1	-0.024	0.07	0.734534	0.977	0.851	1.12	intron_variant	MODIFIER	FAM168A	protein_coding	-	-	2.782	0.169355
LGALS2.3033.57.1	rs5756729		Sun	Wald ratio	1	0.03	0.088	0.734728	1.03	0.867	1.224	intron_variant	MODIFIER	CDC42EP1	protein_coding	-	-	1.072	-0.046297
SPINK2.13405.61.3	rs11941335		Sun	Wald ratio	1	0.03	0.09	0.734951	1.031	0.865	1.229	upstream_gene_variant	MODIFIER	SPINK2	protein_coding	-	-	1.585	0.037135
PSG5	rs62113694		Emilsson	Wald ratio	1	0.028	0.084	0.735596	1.029	0.873	1.212	intergenic_variant	MODIFIER	-	-	-	-	1.393	0.009102
SIGLEC6	rs2124910		Suhre	Wald ratio	1	0.0123	0.0363	0.7357	1.0123	0.9428	1.087	intron_variant	MODIFIER	SIGLEC6	protein_coding	-	-	4.864	0.34999
NEO1.8900.28.3	rs12903656		Sun	Wald ratio	1	0.046	0.136	0.736297	1.047	0.802	1.367	intergenic_variant	MODIFIER	-	-	-	-	5.273	0.386216
PTPRU	rs2179795		Emilsson	Wald ratio	1	0.06	0.178	0.737047	1.062	0.749	1.505	intron_variant	MODIFIER	PTPRU	protein_coding	-	-	3.476	0.230507
PLOD3	rs10215699	rs6957526	Emilsson	Wald ratio	1	0.079	0.237	0.737485	1.083	0.681	1.722
CRP	rs2211320		Yao	Wald ratio	1	-0.056	0.168	0.737881	0.945	0.679	1.315	intergenic_variant	MODIFIER	-	-	-	-	1.833	0.069636
ITIH5.8233.2.3	rs7909223		Sun	Wald ratio	1	-0.029	0.088	0.738883	0.971	0.816	1.155	intron_variant	MODIFIER	ITIH5	protein_coding	-	-	2.225	0.114628
MPO	rs36089182		Emilsson	Wald ratio	1	-0.025	0.074	0.739895	0.976	0.844	1.128	5_prime_UTR_variant	MODIFIER	OR4D1	protein_coding	-	-	3.806	0.258667
CRISP2.9282.12.3	rs478328		Sun	Wald ratio	1	0.014	0.041	0.741043	1.014	0.936	1.098	intron_variant,non_coding_transcript_variant	MODIFIER	-	lncRNA	-	-	2.822	0.17309
MANSC1.9557.5.3	rs2160588		Sun	Wald ratio	1	-0.024	0.072	0.74236	0.977	0.848	1.125	intron_variant	MODIFIER	MANSC1	protein_coding	-	-	4.91	0.354032
ITIH1	rs678		Emilsson	Wald ratio	1	0.012	0.038	0.742961	1.013	0.94	1.091	missense_variant	MODERATE	ITIH1	protein_coding	deleterious(0.01)	probably_damaging(0.992)	24.9	3.57351
CELA2A	rs3001999	rs2496340	Emilsson	Wald ratio	1	0.058	0.177	0.743671	1.059	0.75	1.497
EPHB2	rs2043970		Emilsson	Wald ratio	1	0.032	0.099	0.7447	1.033	0.85	1.254	intron_variant	MODIFIER	EPHB2	protein_coding	-	-	1.727	0.056248
IL23R	rs11209026		Suhre	Wald ratio	1	0.0206	0.0636	0.745823	1.0208	0.9012	1.1564	missense_variant	MODERATE	IL23R	protein_coding	deleterious(0.02)	probably_damaging(0.995)	26	3.82454
IL9	rs756463		Emilsson	Wald ratio	1	-0.064	0.197	0.746057	0.938	0.638	1.379	intron_variant	MODIFIER	TGFBI	protein_coding	-	-	5.751	0.429462
CTSB	rs3947		Suhre	Wald ratio	1	0.0167	0.0518	0.747379	1.0168	0.9186	1.1256	3_prime_UTR_variant	MODIFIER	CTSB	protein_coding	-	-	11.23	0.968505
CAPN2	rs12038299		Emilsson	Wald ratio	1	0.066	0.205	0.74779	1.068	0.715	1.597	intron_variant	MODIFIER	CAPN2	protein_coding	-	-	6.78	0.526607
FCRL6.6617.12.3	rs58240276		Sun	Wald ratio	1	0.016	0.049	0.748968	1.016	0.922	1.119	intron_variant	MODIFIER	FCRL6	protein_coding	-	-	1.468	0.020393
ECI2	rs13437316		Emilsson	Wald ratio	1	-0.06	0.187	0.748968	0.942	0.654	1.358	intron_variant,non_coding_transcript_variant	MODIFIER	-	lncRNA	-	-	4.672	0.333186
FUT10	rs10094645		Emilsson	Wald ratio	1	-0.035	0.111	0.749478	0.965	0.777	1.199	intron_variant	MODIFIER	TTI2	protein_coding	-	-	0.307	-0.303266
PDXK	rs148593140		Emilsson	Wald ratio	1	-0.064	0.202	0.751439	0.938	0.631	1.394	upstream_gene_variant	MODIFIER	AGPAT3	protein_coding	-	-	1.468	0.020416
FAM151A	rs10736390		Emilsson	Wald ratio	1	-0.031	0.098	0.751497	0.97	0.801	1.174	upstream_gene_variant	MODIFIER	MROH7	protein_coding	-	-	3.943	0.270364
LOX-1	rs10505752		Folkersen	Wald ratio	1	0.091	0.287	0.751657	1.095	0.624	1.923	intron_variant	MODIFIER	TMEM52B	protein_coding	-	-	0.37	-0.265152
FUT10.7156.2.3	rs2732317		Sun	Wald ratio	1	-0.017	0.054	0.752494	0.983	0.885	1.092	upstream_gene_variant	MODIFIER	FUT10	protein_coding	-	-	9.793	0.839526
CST4	rs7270028		Emilsson	Wald ratio	1	0.025	0.079	0.752597	1.025	0.878	1.197	intergenic_variant	MODIFIER	-	-	-	-	0.883	-0.086952
TREML1	rs62396317		Emilsson	Wald ratio	1	-0.051	0.163	0.752861	0.95	0.691	1.307	intron_variant,non_coding_transcript_variant	MODIFIER	ADCY10P1	transcribed_unprocessed_pseudoge	-	-	0.747	-0.121956
TMEM190	rs35791293		Emilsson	Wald ratio	1	0.009	0.028	0.753784	1.009	0.956	1.065	upstream_gene_variant	MODIFIER	IL11	protein_coding	-	-	21.2	2.24274
CSTB	rs35285321		Folkersen	Wald ratio	1	-0.015	0.048	0.754661	0.985	0.896	1.083	upstream_gene_variant	MODIFIER	TMEM97P1	processed_pseudogene	-	-	0.26	-0.337472
MCAM	rs11217234		Yao	Wald ratio	1	0.058	0.188	0.755716	1.06	0.734	1.531	downstream_gene_variant	MODIFIER	MCAM	protein_coding	-	-	13.9	1.234
FMOD	rs4971253		Emilsson	Wald ratio	1	-0.044	0.14	0.756149	0.957	0.727	1.261	upstream_gene_variant	MODIFIER	FMOD	protein_coding	-	-	1.559	0.033474
TNFRSF19	rs3814787		Emilsson	Wald ratio	1	0.047	0.152	0.756923	1.048	0.778	1.411	intron_variant	MODIFIER	TNFRSF19	protein_coding	-	-	1.157	-0.030336
RGMA.5483.1.3	rs3752102		Sun	Wald ratio	1	0.041	0.132	0.756991	1.042	0.805	1.348	intron_variant	MODIFIER	RGMA	protein_coding	-	-	8.951	0.75417
SNCA.8458.111.3	rs2245801		Sun	Wald ratio	1	0.036	0.115	0.7573	1.036	0.827	1.298	intron_variant	MODIFIER	SNCA	protein_coding	-	-	7.869	0.637131
AMY2B	rs17014913		Emilsson	Wald ratio	1	0.023	0.075	0.759223	1.023	0.884	1.184	intron_variant	MODIFIER	AMY2B	protein_coding	-	-	3.461	0.229236
EPHB6	rs7789303		Emilsson	Wald ratio	1	0.035	0.113	0.759397	1.035	0.829	1.293	upstream_gene_variant	MODIFIER	EPHB6	protein_coding	-	-	9.487	0.809495
EPHB6.5078.82.3	rs7789303		Sun	Wald ratio	1	0.026	0.084	0.759397	1.026	0.871	1.209	upstream_gene_variant	MODIFIER	EPHB6	protein_coding	-	-	9.487	0.809495
UNC5D	rs6468316		Emilsson	Wald ratio	1	0.05	0.166	0.761571	1.052	0.76	1.456	intron_variant	MODIFIER	UNC5D	protein_coding	-	-	2.719	0.163606
CFH	rs70621		Emilsson	Wald ratio	1	-0.019	0.062	0.762461	0.981	0.868	1.109	intron_variant	MODIFIER	CFH	protein_coding	-	-	0.095	-0.545386
MIA	rs2233154		Emilsson	Wald ratio	1	-0.012	0.038	0.763019	0.988	0.917	1.066	upstream_gene_variant	MODIFIER	RAB4B	protein_coding	-	-	8.733	0.730378
CCNH	rs7719891		Emilsson	Wald ratio	1	0.067	0.221	0.763056	1.069	0.693	1.649	intron_variant	MODIFIER	RASA1	protein_coding	-	-	2.369	0.129556
ISLR2	rs923118		Emilsson	Wald ratio	1	-0.043	0.144	0.763095	0.958	0.722	1.27	5_prime_UTR_variant	MODIFIER	ISLR	protein_coding	-	-	3.058	0.19422
GDF-15	rs1227734		Folkersen	Wald ratio	1	-0.029	0.096	0.763103	0.971	0.805	1.172	downstream_gene_variant	MODIFIER	GDF15	protein_coding	-	-	2.624	0.154642
LECT2	rs248160		Emilsson	Wald ratio	1	-0.023	0.077	0.76322	0.977	0.841	1.135	upstream_gene_variant	MODIFIER	LECT2	protein_coding	-	-	1.122	-0.036694
IGSF3	rs614477		Emilsson	Wald ratio	1	-0.064	0.214	0.764177	0.938	0.617	1.426	intron_variant,non_coding_transcript_variant	MODIFIER	LINC02868	lncRNA	-	-	0.426	-0.236388
CTSZ	rs6070664		Emilsson	Wald ratio	1	-0.016	0.054	0.764297	0.984	0.886	1.093	intron_variant,non_coding_transcript_variant	MODIFIER	-	lncRNA	-	-	0.511	-0.199739
ST6GALNAC5	rs17099799		Emilsson	Wald ratio	1	-0.054	0.18	0.76573	0.948	0.666	1.349	intron_variant	MODIFIER	ST6GALNAC5	protein_coding	-	-	5.715	0.426171
SPINK1	rs4705205		Emilsson	Wald ratio	1	0.034	0.116	0.766659	1.035	0.824	1.299	intergenic_variant	MODIFIER	-	-	-	-	0.167	-0.429479
ANGPT2	rs1968586		Emilsson	Wald ratio	1	-0.069	0.233	0.766789	0.933	0.591	1.473	intron_variant	MODIFIER	MCPH1	protein_coding	-	-	5.241	0.383357
PRCP	rs10898041		Emilsson	Wald ratio	1	0.047	0.158	0.767812	1.048	0.768	1.429	intron_variant	MODIFIER	PRCP	protein_coding	-	-	1.227	-0.018
GLCE	rs3865014		Emilsson	Wald ratio	1	-0.01	0.033	0.768021	0.99	0.929	1.056	missense_variant	MODERATE	GLCE	protein_coding	tolerated(1)	benign(0)	0.197	-0.394697
ADH7	rs17529509		Emilsson	Wald ratio	1	-0.029	0.099	0.768215	0.971	0.8	1.179	intron_variant	MODIFIER	ADH7	protein_coding	-	-	0.45	-0.225332
INHBC	rs775249		Emilsson	Wald ratio	1	-0.065	0.22	0.76884	0.937	0.609	1.443	splice_region_variant,intron_variant	LOW	KIF5A	protein_coding	-	-	7.573	0.606252
SIGLEC14	rs7250849		Suhre	Wald ratio	1	0.0089	0.0305	0.771306	1.0089	0.9504	1.071	regulatory_region_variant	MODIFIER	-	CTCF_binding_site	-	-	0.246	-0.348735
ESAM	rs11604175		Emilsson	Wald ratio	1	0.029	0.101	0.772219	1.03	0.845	1.254	downstream_gene_variant	MODIFIER	ESAM	protein_coding	-	-	4.15	0.288059
ENTPD1	rs4918970		Emilsson	Wald ratio	1	-0.052	0.181	0.772874	0.949	0.666	1.353	intron_variant	MODIFIER	ENTPD1	protein_coding	-	-	8.225	0.675106
CCL4	rs17692864		Folkersen	Wald ratio	1	-0.064	0.222	0.773658	0.938	0.608	1.449	intron_variant	MODIFIER	GGNBP2	protein_coding	-	-	8.527	0.70787
CD300E	rs8081669		Emilsson	Wald ratio	1	-0.025	0.088	0.775097	0.975	0.82	1.159	intron_variant	MODIFIER	CD300E	protein_coding	-	-	0.23	-0.363139
SLAMF7	rs11581248		Emilsson	Wald ratio	1	0.009	0.032	0.775685	1.009	0.948	1.074	intron_variant	MODIFIER	SLAMF7	protein_coding	-	-	4.109	0.284571
SLAMF7.5487.7.3	rs11581248		Sun	Wald ratio	1	0.008	0.03	0.775685	1.008	0.952	1.069	intron_variant	MODIFIER	SLAMF7	protein_coding	-	-	4.109	0.284571
SEMA6A.7945.10.3	rs3733724		Sun	Wald ratio	1	0.035	0.123	0.77591	1.036	0.813	1.319	3_prime_UTR_variant	MODIFIER	SEMA6A	protein_coding	-	-	3.051	0.193622
CD33	rs1354106		Emilsson	Wald ratio	1	0.008	0.028	0.778138	1.008	0.955	1.064	intron_variant	MODIFIER	CD33	protein_coding	-	-	0.269	-0.33072
PPID	rs17843966		Emilsson	Wald ratio	1	0.018	0.066	0.779929	1.018	0.896	1.158	3_prime_UTR_variant	MODIFIER	ETFDH	protein_coding	-	-	13.35	1.16419
CLEC4C	rs11055602		Emilsson	Wald ratio	1	0.007	0.025	0.780117	1.007	0.958	1.058	upstream_gene_variant	MODIFIER	CLEC4C	protein_coding	-	-	1.059	-0.048752
CAT	rs2284367		Suhre	Wald ratio	1	-0.0153	0.0548	0.780574	0.9849	0.8846	1.0965	intron_variant	MODIFIER	CAT	protein_coding	-	-	0.372	-0.263849
GXYLT1	rs139695917		Emilsson	Wald ratio	1	-0.023	0.082	0.781871	0.978	0.832	1.148
GXYLT1.8229.1.3	rs139695917		Sun	Wald ratio	1	-0.02	0.072	0.781871	0.98	0.852	1.128
SNCA	rs1372518		Emilsson	Wald ratio	1	0.024	0.085	0.782091	1.024	0.866	1.211	intron_variant	MODIFIER	SNCA	protein_coding	-	-	7.733	0.622848
IL11RA	rs41274867		Emilsson	Wald ratio	1	-0.027	0.097	0.783038	0.974	0.805	1.177	intron_variant	MODIFIER	GALT	protein_coding	-	-	2.849	0.17554
GLTPD2.7948.129.3	rs34460487		Sun	Wald ratio	1	0.027	0.097	0.783167	1.027	0.85	1.241	intron_variant	MODIFIER	TM4SF5	protein_coding	-	-	0.463	-0.219828
CXCL16	rs35186877		Folkersen	Wald ratio	1	0.054	0.197	0.783603	1.056	0.717	1.553	downstream_gene_variant	MODIFIER	ARRB2	protein_coding	-	-	0.489	-0.208901
SPINT2	rs71354995		Emilsson	Wald ratio	1	0.007	0.027	0.784805	1.007	0.956	1.061	upstream_gene_variant	MODIFIER	C19orf33	protein_coding	-	-	1.117	-0.037701
SPINT2.2843.13.2	rs71354995		Sun	Wald ratio	1	0.007	0.027	0.784805	1.007	0.955	1.063	upstream_gene_variant	MODIFIER	C19orf33	protein_coding	-	-	1.117	-0.037701
LYZ	rs4761234		Emilsson	Wald ratio	1	0.013	0.046	0.78536	1.013	0.925	1.108	TF_binding_site_variant	MODIFIER	-	-	-	-	19.48	2.02973
LYZ.4920.10.1	rs4761234		Sun	Wald ratio	1	0.014	0.05	0.78536	1.014	0.92	1.117	TF_binding_site_variant	MODIFIER	-	-	-	-	19.48	2.02973
PROK2	rs7644362		Emilsson	Wald ratio	1	0.009	0.032	0.786165	1.009	0.948	1.073	intron_variant	MODIFIER	PROK2	protein_coding	-	-	0.943	-0.072998
ADAM19	rs7728609		Emilsson	Wald ratio	1	0.027	0.1	0.786195	1.028	0.844	1.251	intron_variant	MODIFIER	ADAM19	protein_coding	-	-	4.57	0.324324
CHIT1	rs12141375		Suhre	Wald ratio	1	0.0079	0.0291	0.786519	1.0079	0.952	1.067	downstream_gene_variant	MODIFIER	CHIT1	protein_coding	-	-	1.964	0.085462
CDON	rs3740909		Suhre	Wald ratio	1	0.0138	0.0508	0.786557	1.0138	0.9178	1.12	missense_variant	MODERATE	CDON	protein_coding	tolerated(0.81)	benign(0.003)	20.3	2.12397
MMP8	rs35231465		Yao	Wald ratio	1	-0.035	0.129	0.786647	0.966	0.751	1.243	stop_gained	HIGH	MMP8	protein_coding	-	-	37	7.25748
CRISP2	rs586874		Emilsson	Wald ratio	1	0.014	0.05	0.786863	1.014	0.918	1.119	intron_variant,non_coding_transcript_variant	MODIFIER	-	lncRNA	-	-	2.101	0.101083
ERO1LB.7994.41.3	rs1254194		Sun	Wald ratio	1	-0.017	0.063	0.789726	0.983	0.87	1.112	intron_variant	MODIFIER	ERO1B	protein_coding	-	-	4.596	0.326515
ASPN	rs7867909		Emilsson	Wald ratio	1	0.02	0.076	0.79014	1.02	0.879	1.185	intron_variant	MODIFIER	CENPP	protein_coding	-	-	0.285	-0.318591
NOG.5846.24.3	rs79084672		Sun	Wald ratio	1	-0.029	0.109	0.790528	0.972	0.785	1.202	intergenic_variant	MODIFIER	-	-	-	-	2.105	0.101601
CRTAC1	rs588061		Emilsson	Wald ratio	1	-0.019	0.071	0.790774	0.981	0.854	1.127	intron_variant	MODIFIER	CRTAC1	protein_coding	-	-	1.814	0.067228
IGFLR1	rs7260184		Emilsson	Wald ratio	1	-0.015	0.058	0.790774	0.985	0.879	1.103	intron_variant	MODIFIER	LIN37	protein_coding	-	-	3.339	0.218713
CHAD	rs198558		Emilsson	Wald ratio	1	0.056	0.212	0.790822	1.058	0.699	1.601	intron_variant	MODIFIER	CACNA1G	protein_coding	-	-	5.321	0.390526
F5	rs137902590		Emilsson	Wald ratio	1	-0.041	0.155	0.79131	0.96	0.709	1.3
ENTPD1.7999.23.3	rs11188501		Sun	Wald ratio	1	-0.03	0.115	0.791605	0.97	0.775	1.214	intron_variant	MODIFIER	ENTPD1	protein_coding	-	-	0.66	-0.147792
SPON2	rs878323		Emilsson	Wald ratio	1	0.031	0.119	0.79195	1.032	0.817	1.304	upstream_gene_variant	MODIFIER	SPON2	protein_coding	-	-	1.253	-0.013465
LRP12	rs72679151		Emilsson	Wald ratio	1	0.036	0.138	0.792012	1.037	0.791	1.36	intron_variant,non_coding_transcript_variant	MODIFIER	ZFPM2	processed_transcript	-	-	3.273	0.21299
EPHB2.8225.86.3	rs6687487		Sun	Wald ratio	1	0.019	0.071	0.792335	1.019	0.887	1.17	intron_variant	MODIFIER	EPHB2	protein_coding	-	-	2.774	0.168655
EPHB2.8348.4.3	rs6687487		Sun	Wald ratio	1	0.028	0.107	0.792335	1.028	0.835	1.267	intron_variant	MODIFIER	EPHB2	protein_coding	-	-	2.774	0.168655
EPHB2	rs6687487		Suhre	Wald ratio	1	0.0216	0.0819	0.792335	1.0218	0.8703	1.1996	intron_variant	MODIFIER	EPHB2	protein_coding	-	-	2.774	0.168655
LSAMP	rs17646258		Emilsson	Wald ratio	1	0.036	0.14	0.793869	1.037	0.789	1.364	intron_variant	MODIFIER	LSAMP	protein_coding	-	-	3.685	0.248354
CRP	rs4287174		Emilsson	Wald ratio	1	-0.032	0.122	0.794193	0.969	0.762	1.231	intergenic_variant	MODIFIER	-	-	-	-	1.71	0.05401
IL-27	rs4905		Folkersen	Wald ratio	1	-0.01	0.039	0.795103	0.99	0.918	1.068	synonymous_variant	LOW	EBI3	protein_coding	-	-	0.276	-0.325201
FGL1	rs7815429		Emilsson	Wald ratio	1	0.015	0.057	0.797243	1.015	0.908	1.134	intron_variant	MODIFIER	FGL1	protein_coding	-	-	3.776	0.256109
PGF	rs175484		Emilsson	Wald ratio	1	-0.048	0.186	0.797634	0.953	0.663	1.372	intron_variant	MODIFIER	NEK9	protein_coding	-	-	8.078	0.659337
CGA CGB	rs753307		Suhre	Wald ratio	1	0.0277	0.1094	0.799827	1.0281	0.8297	1.2739	intron_variant	MODIFIER	RUVBL2	protein_coding	-	-	2.482	0.140921
PGLYRP1	rs12980641		Emilsson	Wald ratio	1	0.03	0.12	0.799827	1.031	0.815	1.305	upstream_gene_variant	MODIFIER	PGLYRP1	protein_coding	-	-	2.688	0.160675
GALNT10	rs115757082		Emilsson	Wald ratio	1	-0.04	0.158	0.800377	0.961	0.704	1.31	intergenic_variant	MODIFIER	-	-	-	-	3.98	0.273492
CDH11	rs59614634		Emilsson	Wald ratio	1	0.012	0.046	0.800509	1.012	0.924	1.108	intron_variant	MODIFIER	CDH11	protein_coding	-	-	5.428	0.400087
UCMGP	rs7135211		Yao	Wald ratio	1	-0.023	0.091	0.80099	0.977	0.817	1.169	intron_variant,non_coding_transcript_variant	MODIFIER	C12orf60	processed_transcript	-	-	0.218	-0.373976
DDC	rs115538399		Emilsson	Wald ratio	1	0.155	0.62	0.80189	1.168	0.347	3.936	intron_variant	MODIFIER	DDC	protein_coding	-	-	0.547	-0.186147
C1QTNF5.7810.20.3	rs2248863		Sun	Wald ratio	1	-0.027	0.109	0.802043	0.973	0.786	1.205	downstream_gene_variant	MODIFIER	MFRP	protein_coding	-	-	9.923	0.852174
LPA	rs55730499		Yao	Wald ratio	1	-0.009	0.035	0.802147	0.991	0.926	1.062	intron_variant	MODIFIER	LPA	protein_coding	-	-	0.512	-0.199486
EIF4A3	rs9889677		Emilsson	Wald ratio	1	0.056	0.225	0.802587	1.058	0.681	1.643	intron_variant	MODIFIER	CCDC40	protein_coding	-	-	0.592	-0.170218
TNC.4155.3.2	rs1138545		Sun	Wald ratio	1	0.009	0.038	0.804362	1.01	0.936	1.088	missense_variant	MODERATE	TNC	protein_coding	tolerated(0.11)	benign(0.003)	10.29	0.886565
MANSC1	rs61922044		Emilsson	Wald ratio	1	-0.025	0.1	0.804736	0.976	0.802	1.187	intron_variant	MODIFIER	MANSC1	protein_coding	-	-	3.957	0.271544
MMP-10	rs17860955		Folkersen	Wald ratio	1	-0.018	0.074	0.805446	0.982	0.85	1.135	splice_acceptor_variant	HIGH	MMP10	protein_coding	-	-	34	5.35019
MMP10.8479.4.3	rs17860955		Sun	Wald ratio	1	-0.023	0.093	0.805446	0.977	0.814	1.174	splice_acceptor_variant	HIGH	MMP10	protein_coding	-	-	34	5.35019
SERPINA4.14105.5.3	rs10139745		Sun	Wald ratio	1	-0.014	0.058	0.806704	0.986	0.88	1.105	intron_variant	MODIFIER	SERPINA4	protein_coding	-	-	0.118	-0.501776
SERPINA4.3449.58.2	rs10139745		Sun	Wald ratio	1	-0.011	0.046	0.806704	0.989	0.904	1.082	intron_variant	MODIFIER	SERPINA4	protein_coding	-	-	0.118	-0.501776
GKN2	rs13008230		Emilsson	Wald ratio	1	-0.014	0.057	0.806919	0.986	0.882	1.103	downstream_gene_variant	MODIFIER	GKN3P	polymorphic_pseudogene	-	-	6.437	0.493594
ADAM12	rs10794057		Emilsson	Wald ratio	1	0.028	0.115	0.809816	1.028	0.82	1.289	intron_variant	MODIFIER	ADAM12	protein_coding	-	-	0.142	-0.462369
GP1BA.4990.87.1	rs72835078		Sun	Wald ratio	1	0.032	0.135	0.812225	1.033	0.793	1.345	intron_variant	MODIFIER	CHRNE	protein_coding	-	-	0.407	-0.24569
CD300C	rs62087202		Emilsson	Wald ratio	1	0.04	0.167	0.812348	1.04	0.75	1.442	upstream_gene_variant	MODIFIER	CD300A	protein_coding	-	-	0.176	-0.418856
ASAH2	rs2842126		Suhre	Wald ratio	1	-0.0113	0.0478	0.812708	0.9887	0.9004	1.0858	intron_variant	MODIFIER	ASAH2	protein_coding	-	-	0.172	-0.42319
APLP2	rs79537552		Emilsson	Wald ratio	1	0.021	0.09	0.812968	1.022	0.856	1.219	intron_variant	MODIFIER	APLP2	protein_coding	-	-	4.452	0.314093
SELPLG	rs73191242		Emilsson	Wald ratio	1	0.033	0.14	0.813199	1.034	0.786	1.359	downstream_gene_variant	MODIFIER	SELPLG	protein_coding	-	-	1.34	0.000788
SEMA4C	rs112826173		Emilsson	Wald ratio	1	0.026	0.112	0.814267	1.027	0.825	1.278	intron_variant	MODIFIER	CNNM3	protein_coding	-	-	7.625	0.611609
C1QC.14100.63.3	rs78865058		Sun	Wald ratio	1	-0.013	0.057	0.814498	0.987	0.882	1.104	intergenic_variant	MODIFIER	-	-	-	-	1.313	-0.003632
C1QC	rs78865058		Emilsson	Wald ratio	1	-0.013	0.056	0.814498	0.987	0.884	1.102	intergenic_variant	MODIFIER	-	-	-	-	1.313	-0.003632
GRAMD1C.8336.267.3	rs61077924		Sun	Wald ratio	1	-0.016	0.07	0.815402	0.984	0.858	1.128	intron_variant	MODIFIER	GRAMD1C	protein_coding	-	-	2.064	0.096955
GRAMD1C.8842.16.3	rs61077924		Sun	Wald ratio	1	-0.01	0.041	0.815402	0.99	0.913	1.074	intron_variant	MODIFIER	GRAMD1C	protein_coding	-	-	2.064	0.096955
ASAH2	rs2813297		Emilsson	Wald ratio	1	-0.012	0.051	0.815412	0.988	0.895	1.091	intron_variant	MODIFIER	ASAH2	protein_coding	-	-	5.692	0.424106
PTGDS	rs12379667	rs7868669	Emilsson	Wald ratio	1	0.046	0.196	0.815503	1.047	0.713	1.536
SERPINA4	rs10149354		Emilsson	Wald ratio	1	-0.013	0.054	0.815594	0.987	0.888	1.098	downstream_gene_variant	MODIFIER	SERPINA4	protein_coding	-	-	0.073	-0.598525
TMEM190.10442.1.3	rs4806666		Sun	Wald ratio	1	0.006	0.027	0.816835	1.006	0.954	1.062	upstream_gene_variant	MODIFIER	TMEM190	protein_coding	-	-	0.014	-0.902172
CACNA2D3.8885.6.3	rs34084772		Sun	Wald ratio	1	0.031	0.134	0.816918	1.031	0.794	1.34	upstream_gene_variant	MODIFIER	CACNA2D3	protein_coding	-	-	1.623	0.042382
CNTN5.3299.29.2	rs4316475		Sun	Wald ratio	1	-0.027	0.115	0.816957	0.974	0.777	1.22	intron_variant	MODIFIER	CNTN5	protein_coding	-	-	0.99	-0.062843
PEAR1	rs11264581		Emilsson	Wald ratio	1	0.039	0.167	0.817105	1.039	0.749	1.441	missense_variant	MODERATE	PEAR1	protein_coding	tolerated(0.49)	benign(0)	6.813	0.529847
TAC1	rs10260339		Emilsson	Wald ratio	1	0.046	0.201	0.818686	1.047	0.707	1.552	intergenic_variant	MODIFIER	-	-	-	-	1.186	-0.025152
ASPH.6998.106.3	rs112760834		Sun	Wald ratio	1	0.027	0.116	0.818739	1.027	0.818	1.29	intron_variant	MODIFIER	ASPH	protein_coding	-	-	3.407	0.22456
FCER2.3291.30.2	rs12973524		Sun	Wald ratio	1	-0.019	0.085	0.819802	0.981	0.831	1.158	intron_variant	MODIFIER	FCER2	protein_coding	-	-	0.874	-0.088995
GGH.9370.69.3	rs10957266		Sun	Wald ratio	1	-0.013	0.058	0.822104	0.987	0.88	1.107	downstream_gene_variant	MODIFIER	GGH	protein_coding	-	-	3.43	0.226525
MIA.2687.2.1	rs2604877		Sun	Wald ratio	1	-0.007	0.032	0.823203	0.993	0.933	1.057	downstream_gene_variant	MODIFIER	SNRPA	protein_coding	-	-	0.219	-0.373039
PCSK9	rs191448950		Emilsson	Wald ratio	1	-0.033	0.15	0.823925	0.967	0.722	1.297
ENTPD5.4437.56.3	rs57731447		Sun	Wald ratio	1	0.012	0.053	0.825659	1.012	0.912	1.123	intron_variant	MODIFIER	BBOF1	protein_coding	-	-	2.966	0.186067
KLK11	rs1048328	rs62115743	Emilsson	Wald ratio	1	0.009	0.042	0.825805	1.009	0.929	1.096
TNF-R1	rs4149584		Folkersen	Wald ratio	1	0.067	0.305	0.826002	1.069	0.588	1.946	missense_variant	MODERATE	TNFRSF1A	protein_coding	deleterious(0.01)	possibly_damaging(0.851)	17.85	1.81608
PRCP.5722.78.3	rs2229437		Sun	Wald ratio	1	0.023	0.106	0.827793	1.023	0.832	1.259	missense_variant	MODERATE	PRCP	protein_coding	deleterious(0.02)	benign(0.009)	20.5	2.14777
hK11	rs117268623		Folkersen	Wald ratio	1	0.012	0.057	0.828452	1.013	0.905	1.133	missense_variant	MODERATE	KLK11	protein_coding	tolerated(1)	benign(0.062)	6.808	0.52936
IGLON5	rs35982135		Emilsson	Wald ratio	1	0.048	0.225	0.82918	1.05	0.676	1.63	intron_variant	MODIFIER	IGLON5	protein_coding	-	-	2.264	0.118699
NMB	rs12912342		Emilsson	Wald ratio	1	-0.032	0.151	0.830099	0.968	0.721	1.301	intron_variant	MODIFIER	SEC11A	protein_coding	-	-	3.256	0.211534
CBX5	rs4759076		Emilsson	Wald ratio	1	0.048	0.225	0.830553	1.049	0.675	1.631	intron_variant	MODIFIER	COPZ1	protein_coding	-	-	5.422	0.399624
Ceruloplasmin	rs34004251		Yao	Wald ratio	1	0.025	0.119	0.832994	1.025	0.812	1.295	intron_variant	MODIFIER	CP	protein_coding	-	-	1.652	0.046243
PCSK1.13388.57.3	rs6234		Sun	Wald ratio	1	-0.005	0.024	0.833257	0.995	0.949	1.043	missense_variant	MODERATE	PCSK1	protein_coding	tolerated_low_confidence(1)	benign(0)	0.046	-0.690372
CLIC5.12475.48.3	rs35822882		Sun	Wald ratio	1	0.021	0.099	0.833764	1.021	0.84	1.241	missense_variant	MODERATE	CLIC5	protein_coding	deleterious(0)	probably_damaging(0.992)	28.4	4.16951
CCL25.14068.29.3	rs62124688		Sun	Wald ratio	1	-0.015	0.072	0.834105	0.985	0.856	1.134	intron_variant	MODIFIER	CCL25	protein_coding	-	-	1.54	0.03073
ART4.6576.1.3	rs1001096		Sun	Wald ratio	1	-0.007	0.032	0.834288	0.993	0.932	1.058	intron_variant	MODIFIER	ART4	protein_coding	-	-	0.895	-0.084098
SECTM1	rs79181084		Emilsson	Wald ratio	1	0.02	0.096	0.834483	1.02	0.845	1.231	downstream_gene_variant	MODIFIER	TEX19	protein_coding	-	-	2.672	0.159151
TGFBI	rs3792900		Suhre	Wald ratio	1	-0.0109	0.0523	0.83483	0.9891	0.8927	1.096	intron_variant	MODIFIER	TGFBI	protein_coding	-	-	9.773	0.837609
ENDOU	rs2072117		Emilsson	Wald ratio	1	0.033	0.157	0.835985	1.033	0.759	1.405	intron_variant	MODIFIER	RAPGEF3	protein_coding	-	-	8.749	0.732114
GLCE.7808.5.3	rs11854180		Sun	Wald ratio	1	-0.007	0.033	0.836966	0.993	0.93	1.06	intron_variant	MODIFIER	GLCE	protein_coding	-	-	0.173	-0.421752
GALNT16	rs12100668		Emilsson	Wald ratio	1	0.025	0.124	0.838223	1.026	0.805	1.307	intron_variant	MODIFIER	GALNT16	protein_coding	-	-	0.039	-0.722812
MASP1	rs28945068		Emilsson	Wald ratio	1	-0.013	0.066	0.838364	0.987	0.867	1.123	missense_variant	MODERATE	MASP1	protein_coding	tolerated(0.47)	benign(0.033)	12.99	1.12359
VAMP8	rs76680416		Emilsson	Wald ratio	1	0.043	0.212	0.839995	1.044	0.689	1.58	intergenic_variant	MODIFIER	-	-	-	-	1.504	0.025586
ALOX15B	rs8073913		Emilsson	Wald ratio	1	0.031	0.155	0.840193	1.032	0.762	1.397	upstream_gene_variant	MODIFIER	-	lncRNA	-	-	3.714	0.250836
MANF	rs1552074		Emilsson	Wald ratio	1	-0.017	0.083	0.84196	0.984	0.835	1.158	intron_variant	MODIFIER	DOCK3	protein_coding	-	-	0.061	-0.636463
CARS	rs10833024		Emilsson	Wald ratio	1	0.047	0.237	0.842092	1.048	0.659	1.668	intron_variant	MODIFIER	NAP1L4	protein_coding	-	-	2.816	0.172489
CBR1	rs57716069		Emilsson	Wald ratio	1	0.02	0.101	0.843793	1.02	0.837	1.243	intron_variant	MODIFIER	SETD4	protein_coding	-	-	0.241	-0.35313
FLRT3	rs13038351		Emilsson	Wald ratio	1	0.014	0.072	0.845232	1.014	0.88	1.169	intron_variant	MODIFIER	MACROD2	protein_coding	-	-	2.082	0.09897
ESM1	rs4242051		Emilsson	Wald ratio	1	-0.043	0.221	0.845508	0.958	0.621	1.477	TF_binding_site_variant	MODIFIER	-	-	-	-	2.98	0.187269
REN	rs193280350		Folkersen	Wald ratio	1	-0.032	0.165	0.846283	0.969	0.701	1.338
REN.3396.54.2	rs193280350		Sun	Wald ratio	1	-0.023	0.12	0.846283	0.977	0.773	1.235
MGP	rs67482087		Emilsson	Wald ratio	1	-0.024	0.122	0.846633	0.977	0.769	1.241	intron_variant,non_coding_transcript_variant	MODIFIER	C12orf60	processed_transcript	-	-	3.639	0.244475
SELL	rs12938		Suhre	Wald ratio	1	-0.0107	0.0552	0.846717	0.9894	0.8879	1.1025	3_prime_UTR_variant	MODIFIER	SELL	protein_coding	-	-	0.1	-0.534612
DYNLL2	rs35729384		Emilsson	Wald ratio	1	-0.032	0.164	0.846817	0.969	0.703	1.336	downstream_gene_variant	MODIFIER	-	TEC	-	-	4.625	0.329027
PYY	rs8074783		Emilsson	Wald ratio	1	0.031	0.16	0.848341	1.031	0.754	1.41	downstream_gene_variant	MODIFIER	PYY	protein_coding	-	-	2.117	0.10292
TPST2.8024.64.3	rs2283824		Sun	Wald ratio	1	-0.019	0.098	0.850034	0.982	0.81	1.189	intron_variant	MODIFIER	TPST2	protein_coding	-	-	6.41	0.491026
PZP	rs7311982		Emilsson	Wald ratio	1	-0.01	0.051	0.851269	0.99	0.896	1.095	intron_variant	MODIFIER	PZP	protein_coding	-	-	2.474	0.140075
FGF7.14031.18.3	rs7162172		Sun	Wald ratio	1	-0.024	0.13	0.851879	0.976	0.757	1.259	intron_variant	MODIFIER	ATP8B4	protein_coding	-	-	0.538	-0.1896
FKBP7	rs10930831		Emilsson	Wald ratio	1	-0.015	0.082	0.852408	0.985	0.838	1.158	intron_variant	MODIFIER	PRKRA	protein_coding	-	-	1.373	0.005873
PARK7	rs34878017		Emilsson	Wald ratio	1	-0.037	0.199	0.852525	0.964	0.653	1.423	upstream_gene_variant	MODIFIER	TNFRSF9	protein_coding	-	-	3.46	0.229103
CAT	rs7933285		Emilsson	Wald ratio	1	-0.017	0.092	0.852754	0.983	0.821	1.177	intron_variant	MODIFIER	CAT	protein_coding	-	-	0.181	-0.412993
GHR	rs17574650		Emilsson	Wald ratio	1	0.027	0.145	0.852865	1.027	0.773	1.365	intron_variant	MODIFIER	GHR	protein_coding	-	-	15.35	1.44112
SFTPB	rs1130866		Emilsson	Wald ratio	1	-0.007	0.037	0.853767	0.993	0.923	1.068	missense_variant,splice_region_variant	MODERATE	SFTPB	protein_coding	tolerated(1)	benign(0)	15.54	1.46957
RELT	rs7119167		Suhre	Wald ratio	1	-0.0131	0.0713	0.853992	0.987	0.8583	1.135	intron_variant	MODIFIER	FAM168A	protein_coding	-	-	0.361	-0.270204
CTSB	rs1736089		Emilsson	Wald ratio	1	0.008	0.045	0.85468	1.008	0.924	1.1	intron_variant	MODIFIER	CTSB	protein_coding	-	-	0.225	-0.367664
IL27RA	rs11667546		Emilsson	Wald ratio	1	0.015	0.08	0.854855	1.015	0.867	1.187	intron_variant	MODIFIER	DCAF15	protein_coding	-	-	0.221	-0.370807
ASH2L	rs80081744		Emilsson	Wald ratio	1	0.038	0.209	0.855113	1.039	0.689	1.566	downstream_gene_variant	MODIFIER	DDHD2	protein_coding	-	-	1.433	0.015101
RARRES2	rs9640161		Suhre	Wald ratio	1	0.0133	0.0726	0.855159	1.0133	0.8789	1.1684	intergenic_variant	MODIFIER	-	-	-	-	6.415	0.491447
PPID	rs8396		Suhre	Wald ratio	1	0.0096	0.0529	0.856264	1.0096	0.9102	1.1199	3_prime_UTR_variant	MODIFIER	PPID	protein_coding	-	-	0.075	-0.59327
BIN1	rs11694743		Emilsson	Wald ratio	1	-0.033	0.181	0.857473	0.968	0.678	1.381	intron_variant	MODIFIER	BIN1	protein_coding	-	-	0.986	-0.063754
PLEKHA7	rs407354		Emilsson	Wald ratio	1	-0.03	0.168	0.857608	0.97	0.697	1.35	intron_variant	MODIFIER	PLEKHA7	protein_coding	-	-	0.603	-0.166443
SEMA5A.13132.14.3	rs17329170		Sun	Wald ratio	1	-0.005	0.028	0.858205	0.995	0.942	1.051	upstream_gene_variant	MODIFIER	SEMA5A	protein_coding	-	-	2.334	0.12603
FCN2	rs2989736		Suhre	Wald ratio	1	-0.0139	0.0781	0.858829	0.9862	0.8463	1.1493	3_prime_UTR_variant	MODIFIER	FCN1	protein_coding	-	-	0.362	-0.269649
ANXA2	rs61381915		Emilsson	Wald ratio	1	0.025	0.141	0.859253	1.025	0.778	1.352	regulatory_region_variant	MODIFIER	-	promoter_flanking_region	-	-	2.771	0.168412
CRYZ	rs3819946		Emilsson	Wald ratio	1	-0.005	0.029	0.859656	0.995	0.939	1.054	missense_variant	MODERATE	CRYZ	protein_coding	tolerated(1)	benign(0)	16	1.54155
VEGFA	rs864430		Emilsson	Wald ratio	1	-0.018	0.104	0.860504	0.982	0.8	1.205	intergenic_variant	MODIFIER	-	-	-	-	0.125	-0.4891
PCSK1	rs1820177		Emilsson	Wald ratio	1	-0.005	0.028	0.862066	0.995	0.942	1.052	intron_variant,non_coding_transcript_variant	MODIFIER	-	lncRNA	-	-	0.631	-0.156975
F13B	rs12116643		Emilsson	Wald ratio	1	0.01	0.058	0.862686	1.01	0.901	1.132	intron_variant	MODIFIER	CFHR5	protein_coding	-	-	5.937	0.446568
NAGK	rs6714900		Suhre	Wald ratio	1	0.0083	0.0487	0.863976	1.0084	0.9165	1.1095	intergenic_variant	MODIFIER	-	-	-	-	0.537	-0.190039
MAPK3	rs28529403		Emilsson	Wald ratio	1	-0.037	0.218	0.864435	0.964	0.629	1.476	upstream_gene_variant	MODIFIER	MAPK3	protein_coding	-	-	10.26	0.883388
HSP90B1	rs2576975		Emilsson	Wald ratio	1	-0.004	0.025	0.865567	0.996	0.948	1.046	intron_variant	MODIFIER	C12orf73	protein_coding	-	-	1.758	0.060163
CX3CL1.2827.23.2	rs62037084		Sun	Wald ratio	1	0.02	0.118	0.865801	1.02	0.81	1.284
SCARA5	rs2727013		Emilsson	Wald ratio	1	-0.016	0.097	0.866583	0.984	0.813	1.19	intron_variant	MODIFIER	SCARA5	protein_coding	-	-	1.884	0.075868
CCL23.2913.1.2	rs72830000		Sun	Wald ratio	1	-0.009	0.052	0.869368	0.991	0.895	1.098	upstream_gene_variant	MODIFIER	CCL16	protein_coding	-	-	5.311	0.389615
CCL21	rs11515363		Emilsson	Wald ratio	1	0.024	0.145	0.869635	1.024	0.771	1.36	intron_variant,non_coding_transcript_variant	MODIFIER	-	lncRNA	-	-	0.887	-0.0859
B4GALT7	rs729460		Emilsson	Wald ratio	1	-0.033	0.202	0.869966	0.967	0.651	1.438	intron_variant	MODIFIER	B4GALT7	protein_coding	-	-	10.36	0.892637
GGH	rs4739046		Emilsson	Wald ratio	1	-0.011	0.066	0.872409	0.99	0.87	1.125	intron_variant	MODIFIER	TTPA	protein_coding	-	-	0.864	-0.091439
PLXNB2	rs7292268		Emilsson	Wald ratio	1	-0.005	0.033	0.872881	0.995	0.932	1.062	intron_variant	MODIFIER	PPP6R2	protein_coding	-	-	0.678	-0.142215
CD300C.5066.134.3	rs62087214		Sun	Wald ratio	1	-0.015	0.094	0.875256	0.985	0.82	1.184	intron_variant	MODIFIER	CD300A	protein_coding	-	-	2.316	0.12413
TNFRSF1B	rs5745994		Emilsson	Wald ratio	1	-0.028	0.179	0.87543	0.972	0.685	1.38	intron_variant	MODIFIER	TNFRSF1B	protein_coding	-	-	5.031	0.364681
TRAIL	rs142552223		Folkersen	Wald ratio	1	0.02	0.127	0.876001	1.02	0.796	1.308	intron_variant	MODIFIER	TNFSF10	protein_coding	-	-	1.622	0.042252
WFIKKN2	rs12946082		Emilsson	Wald ratio	1	-0.007	0.048	0.877009	0.993	0.904	1.09	downstream_gene_variant	MODIFIER	WFIKKN2	protein_coding	-	-	1.738	0.057669
AMY1A.7918.114.3	rs7538379		Sun	Wald ratio	1	-0.009	0.062	0.878676	0.991	0.878	1.118	upstream_gene_variant	MODIFIER	RNPC3	protein_coding	-	-	3.432	0.226755
NAPA	rs2914001		Emilsson	Wald ratio	1	0.03	0.196	0.879105	1.03	0.702	1.511	intron_variant	MODIFIER	ZNF541	protein_coding	-	-	1.145	-0.032409
PNLIPRP2	rs7910135		Emilsson	Wald ratio	1	-0.004	0.025	0.87977	0.996	0.949	1.045	intron_variant	MODIFIER	PNLIPRP2	protein_coding	-	-	0.658	-0.14827
CD33.3166.92.1	rs12459419		Sun	Wald ratio	1	-0.004	0.027	0.880138	0.996	0.945	1.05	missense_variant	MODERATE	CD33	protein_coding	deleterious(0.05)	benign(0.001)	14.65	1.33637
CD33	rs12459419		Suhre	Wald ratio	1	-0.0034	0.0222	0.880138	0.9967	0.9541	1.0411	missense_variant	MODERATE	CD33	protein_coding	deleterious(0.05)	benign(0.001)	14.65	1.33637
PCSK7	rs9326248		Suhre	Wald ratio	1	0.0042	0.0282	0.880765	1.0042	0.9502	1.0613	intergenic_variant	MODIFIER	-	-	-	-	1.501	0.02515
CXCL16	rs2326100		Emilsson	Wald ratio	1	0.024	0.161	0.881874	1.024	0.748	1.403	intron_variant	MODIFIER	TM4SF5	protein_coding	-	-	0.984	-0.064199
RELT.14112.40.3	rs3741148		Sun	Wald ratio	1	-0.018	0.12	0.882125	0.982	0.777	1.243	3_prime_UTR_variant	MODIFIER	FAM168A	protein_coding	-	-	0.112	-0.512805
NT5C	rs117844704		Emilsson	Wald ratio	1	0.008	0.054	0.883843	1.008	0.906	1.121	intron_variant	MODIFIER	SLC16A5	protein_coding	-	-	13.23	1.15049
ACP6	rs2153463		Emilsson	Wald ratio	1	-0.004	0.027	0.884182	0.996	0.945	1.05	missense_variant	MODERATE	ACP6	protein_coding	tolerated(0.06)	benign(0.005)	13.26	1.154
PTK7	rs41274898	rs73434550	Emilsson	Wald ratio	1	0.038	0.264	0.884822	1.039	0.619	1.744
COLEC12.5457.5.2	rs2846667		Sun	Wald ratio	1	0.02	0.138	0.885591	1.02	0.779	1.336	intron_variant	MODIFIER	COLEC12	protein_coding	-	-	0.099	-0.537504
MAN2B2.9251.28.3	rs2301790		Sun	Wald ratio	1	0.011	0.077	0.886403	1.011	0.869	1.177	missense_variant	MODERATE	MAN2B2	protein_coding	tolerated(1)	benign(0)	3.323	0.2173
CYB5D2	rs77246175		Emilsson	Wald ratio	1	-0.021	0.149	0.887949	0.979	0.731	1.312	intron_variant	MODIFIER	ANKFY1	protein_coding	-	-	6.836	0.53209
PSAP	rs7086891		Emilsson	Wald ratio	1	-0.006	0.045	0.88883	0.994	0.91	1.086	intergenic_variant	MODIFIER	-	-	-	-	0.986	-0.063724
CXCL10.4141.79.1	rs11548618		Sun	Wald ratio	1	0.005	0.037	0.889297	1.005	0.936	1.08	missense_variant	MODERATE	CXCL10	protein_coding	deleterious(0)	benign(0.201)	23.1	2.84226
KLKB1	rs4253305		Emilsson	Wald ratio	1	-0.007	0.049	0.889722	0.993	0.902	1.093	intron_variant	MODIFIER	KLKB1	protein_coding	-	-	2.613	0.153583
ART4	rs3887182		Emilsson	Wald ratio	1	-0.005	0.033	0.890181	0.995	0.933	1.062	upstream_gene_variant	MODIFIER	ART4	protein_coding	-	-	0.259	-0.338544
LSAMP.2999.6.2	rs2116308		Sun	Wald ratio	1	0.016	0.119	0.892229	1.016	0.806	1.282	intron_variant	MODIFIER	LSAMP	protein_coding	-	-	0.474	-0.214977
LEPR	rs17415296		Suhre	Wald ratio	1	-0.003	0.0221	0.892229	0.997	0.9547	1.0412	intron_variant	MODIFIER	LEPR	protein_coding	-	-	15.5	1.4629
PDGFD	rs10895596		Emilsson	Wald ratio	1	0.006	0.042	0.892916	1.006	0.927	1.091	intron_variant	MODIFIER	PDGFD	protein_coding	-	-	4.252	0.296854
GLRX2.12486.8.3	rs148212596		Sun	Wald ratio	1	0.012	0.091	0.893143	1.012	0.848	1.209	start_lost	HIGH	GLRX2	protein_coding	deleterious_low_confidence(0)	benign(0.026)	14.78	1.35552
CNTN5	rs1461672		Suhre	Wald ratio	1	-0.0082	0.0609	0.893222	0.9919	0.8803	1.1176	intron_variant	MODIFIER	CNTN5	protein_coding	-	-	0.357	-0.272383
AGRP.2813.11.2	rs60697456		Sun	Wald ratio	1	-0.016	0.123	0.893655	0.984	0.774	1.251	downstream_gene_variant	MODIFIER	ATP6V0D1-DT	lncRNA	-	-	0.174	-0.420901
CREG1	rs7516079		Emilsson	Wald ratio	1	-0.012	0.089	0.89393	0.988	0.83	1.177	intron_variant	MODIFIER	CREG1	protein_coding	-	-	0.613	-0.162895
LGALS2	rs2281097		Emilsson	Wald ratio	1	0.014	0.104	0.894367	1.014	0.826	1.244	downstream_gene_variant	MODIFIER	CDC42EP1	protein_coding	-	-	1.087	-0.043403
IL10RB	rs2834167		Emilsson	Wald ratio	1	-0.024	0.179	0.894665	0.977	0.687	1.388	stop_gained	HIGH	IL10RB	protein_coding	-	-	36	6.91873
PLA2G12B	rs3829126		Emilsson	Wald ratio	1	0.032	0.24	0.895317	1.032	0.645	1.653	intron_variant	MODIFIER	PLA2G12B	protein_coding	-	-	0.572	-0.176989
CPM	rs12298772		Emilsson	Wald ratio	1	-0.03	0.229	0.895456	0.97	0.619	1.52	regulatory_region_variant	MODIFIER	-	enhancer	-	-	4.918	0.354729
NUDT9	rs10030035		Emilsson	Wald ratio	1	0.013	0.102	0.896013	1.013	0.829	1.239	intron_variant	MODIFIER	NUDT9	protein_coding	-	-	3.317	0.216842
CAT.3488.64.2	rs2745924		Sun	Wald ratio	1	-0.016	0.125	0.899271	0.984	0.77	1.258	intergenic_variant	MODIFIER	-	-	-	-	3.606	0.241577
CDON	rs60929339		Emilsson	Wald ratio	1	0.008	0.062	0.899365	1.008	0.892	1.139	intron_variant	MODIFIER	CDON	protein_coding	-	-	7.805	0.630467
LEPR.5400.52.3	rs3790438		Sun	Wald ratio	1	-0.003	0.023	0.902439	0.997	0.954	1.042	intron_variant	MODIFIER	LEPR	protein_coding	-	-	13.68	1.20611
DEFB1.6629.3.3	rs2738176		Sun	Wald ratio	1	-0.008	0.063	0.902543	0.992	0.877	1.123	upstream_gene_variant	MODIFIER	DEFB1	protein_coding	-	-	1.961	0.085089
SPOCK2	rs1245547		Emilsson	Wald ratio	1	-0.014	0.112	0.902612	0.986	0.791	1.229	intron_variant	MODIFIER	SPOCK2	protein_coding	-	-	13.8	1.22171
REG1A	rs1448213		Emilsson	Wald ratio	1	-0.014	0.115	0.902862	0.986	0.786	1.236	intergenic_variant	MODIFIER	-	-	-	-	0.061	-0.636635
H6PD	rs9435144		Emilsson	Wald ratio	1	-0.006	0.048	0.902938	0.994	0.905	1.093	intron_variant	MODIFIER	H6PD	protein_coding	-	-	10.49	0.905666
PPP3CA PPP3R1	rs17266357		Suhre	Wald ratio	1	-0.0082	0.0671	0.903329	0.9919	0.8696	1.1313	intron_variant	MODIFIER	BANK1	protein_coding	-	-	0.768	-0.116053
GFRA2	rs10503709		Suhre	Wald ratio	1	-0.0101	0.0833	0.903423	0.9899	0.8409	1.1655	intergenic_variant	MODIFIER	-	-	-	-	10.26	0.883398
CCL14.2900.53.3	rs9903158		Sun	Wald ratio	1	-0.006	0.049	0.903523	0.994	0.903	1.094	upstream_gene_variant	MODIFIER	CCL16	protein_coding	-	-	5.948	0.447623
TNC	rs72758637		Emilsson	Wald ratio	1	-0.005	0.04	0.903598	0.995	0.921	1.076	intron_variant	MODIFIER	TNC	protein_coding	-	-	1.981	0.087458
APOL1	rs2071732		Emilsson	Wald ratio	1	0.015	0.126	0.904483	1.015	0.793	1.299	intron_variant	MODIFIER	MYH9	protein_coding	-	-	0.141	-0.463965
CD109	rs10455097		Suhre	Wald ratio	1	-0.0046	0.0388	0.904754	0.9954	0.9225	1.074	missense_variant,splice_region_variant	MODERATE	CD109	protein_coding	tolerated(1)	benign(0)	16.13	1.562
SFRP1.3221.54.1	rs138942288		Sun	Wald ratio	1	0.015	0.127	0.905142	1.015	0.792	1.302
ALCAM.5451.1.3	rs9830049		Sun	Wald ratio	1	0.014	0.116	0.906085	1.014	0.807	1.273	intron_variant	MODIFIER	ALCAM	protein_coding	-	-	3.426	0.22624
TAPBPL	rs12964		Emilsson	Wald ratio	1	-0.003	0.026	0.909298	0.997	0.947	1.05	downstream_gene_variant	MODIFIER	TAPBPL	protein_coding	-	-	6.309	0.4814
B4GALT2	rs1859728		Emilsson	Wald ratio	1	-0.015	0.131	0.909665	0.985	0.762	1.274	missense_variant	MODERATE	B4GALT2	protein_coding	tolerated(0.07)	probably_damaging(0.95)	25.1	3.62391
PROC	rs2069901		Emilsson	Wald ratio	1	0.016	0.139	0.910054	1.016	0.774	1.334	upstream_gene_variant	MODIFIER	PROC	protein_coding	-	-	1.387	0.008185
TMEM2	rs1410986		Emilsson	Wald ratio	1	0.021	0.189	0.910848	1.021	0.705	1.48	intergenic_variant	MODIFIER	-	-	-	-	2.047	0.095009
ADGRE2	rs117569858		Emilsson	Wald ratio	1	-0.022	0.201	0.911369	0.978	0.66	1.449	intron_variant	MODIFIER	ADGRE3	protein_coding	-	-	3.407	0.224612
WFIKKN2.13408.23.3	rs7225465		Sun	Wald ratio	1	-0.004	0.039	0.911877	0.996	0.923	1.074	intron_variant	MODIFIER	WFIKKN2	protein_coding	-	-	2.085	0.099284
NTF3	rs17784533		Emilsson	Wald ratio	1	0.022	0.201	0.911992	1.022	0.689	1.516	intron_variant	MODIFIER	NTF3	protein_coding	-	-	8.22	0.674582
GSTM1	rs115929572		Emilsson	Wald ratio	1	0.021	0.196	0.913691	1.022	0.695	1.501	downstream_gene_variant	MODIFIER	GSTM2	protein_coding	-	-	4.959	0.358321
GSTM3	rs115929572		Emilsson	Wald ratio	1	0.013	0.123	0.913691	1.013	0.797	1.289	downstream_gene_variant	MODIFIER	GSTM2	protein_coding	-	-	4.959	0.358321
EDAR	rs6750059		Suhre	Wald ratio	1	0.0066	0.0618	0.915092	1.0066	0.8917	1.1363	intergenic_variant	MODIFIER	-	-	-	-	5.128	0.373261
FCGR2A.3309.2.2	rs1801274		Sun	Wald ratio	1	-0.002	0.02	0.91514	0.998	0.96	1.037	missense_variant	MODERATE	FCGR2A	protein_coding	tolerated(0.32)	benign(0.005)	0.006	-1.03937
TXNDC15	rs78165052		Emilsson	Wald ratio	1	-0.012	0.111	0.916167	0.988	0.794	1.23	intron_variant	MODIFIER	PCBD2	protein_coding	-	-	1.656	0.046805
CXCL11	rs72651379	rs67210456	Emilsson	Wald ratio	1	-0.018	0.172	0.91626	0.982	0.701	1.376
CBR1.12381.26.3	rs16993864	rs73372460	Sun	Wald ratio	1	-0.007	0.068	0.918606	0.993	0.87	1.134
CLEC11A	rs13866		Emilsson	Wald ratio	1	0.018	0.173	0.919151	1.018	0.725	1.428	3_prime_UTR_variant	MODIFIER	CLEC11A	protein_coding	-	-	7.365	0.584849
PLXNC1.4564.2.2	rs115651556		Sun	Wald ratio	1	-0.005	0.053	0.921473	0.995	0.898	1.103	missense_variant	MODERATE	PLXNC1	protein_coding	tolerated(0.63)	benign(0)	10.97	0.948019
PLAU.4158.54.2	rs2227551		Sun	Wald ratio	1	-0.011	0.108	0.921547	0.989	0.8	1.224	upstream_gene_variant	MODIFIER	PLAU	protein_coding	-	-	9.024	0.762034
HAPLN1	rs72772967		Emilsson	Wald ratio	1	-0.019	0.197	0.922205	0.981	0.667	1.443	intergenic_variant	MODIFIER	-	-	-	-	8.686	0.72529
CNTN5	rs2614546		Emilsson	Wald ratio	1	-0.014	0.148	0.924637	0.986	0.737	1.319	intron_variant	MODIFIER	CNTN5	protein_coding	-	-	4.342	0.304574
CDNF.4962.52.1	rs61738953		Sun	Wald ratio	1	0.01	0.107	0.925308	1.01	0.819	1.245	stop_gained	HIGH	CDNF	protein_coding	-	-	42	8.2975
SPOCK2.5491.12.3	rs1245540		Sun	Wald ratio	1	-0.01	0.109	0.926041	0.99	0.8	1.225	upstream_gene_variant	MODIFIER	SPOCK2	protein_coding	-	-	0.044	-0.699786
NFASC	rs6663324		Emilsson	Wald ratio	1	-0.007	0.073	0.927565	0.993	0.86	1.147	intron_variant	MODIFIER	NFASC	protein_coding	-	-	13.38	1.16835
CD36	rs11974777		Emilsson	Wald ratio	1	-0.018	0.197	0.927717	0.982	0.668	1.444	intron_variant	MODIFIER	CD36	protein_coding	-	-	0.312	-0.299948
SPOCK3.9906.21.3	rs17599599		Sun	Wald ratio	1	-0.008	0.088	0.928436	0.992	0.835	1.179	intron_variant	MODIFIER	SPOCK3	protein_coding	-	-	2.38	0.130683
SWAP70.13552.7.3	rs415895		Sun	Wald ratio	1	0.008	0.093	0.929313	1.008	0.84	1.211	stop_gained	HIGH	SWAP70	protein_coding	-	-	43	8.49416
MFAP2.9294.45.3	rs4920605		Sun	Wald ratio	1	0.01	0.114	0.929394	1.01	0.807	1.264	intron_variant	MODIFIER	ATP13A2	protein_coding	-	-	0.322	-0.293324
CTSZ.4971.1.1	rs199825459		Sun	Wald ratio	1	0.006	0.065	0.930778	1.006	0.885	1.143
VWC2	rs79259707		Emilsson	Wald ratio	1	-0.009	0.099	0.93122	0.992	0.817	1.203	upstream_gene_variant	MODIFIER	VWC2	protein_coding	-	-	5.971	0.44971
TNFRSF17	rs256400		Emilsson	Wald ratio	1	0.017	0.195	0.932518	1.017	0.693	1.491	downstream_gene_variant	MODIFIER	NPIPB2	protein_coding	-	-	1.558	0.033368
CASS4	rs117403184		Emilsson	Wald ratio	1	-0.018	0.215	0.933287	0.982	0.645	1.496	regulatory_region_variant	MODIFIER	-	open_chromatin_region	-	-	0.511	-0.199955
LILRA4.8299.66.3	rs2241384		Sun	Wald ratio	1	0.009	0.115	0.934893	1.009	0.806	1.265	missense_variant	MODERATE	LILRA4	protein_coding	tolerated(1)	benign(0.005)	5.484	0.405163
LILRA4	rs2241384		Emilsson	Wald ratio	1	0.012	0.149	0.934893	1.012	0.756	1.356	missense_variant	MODERATE	LILRA4	protein_coding	tolerated(1)	benign(0.005)	5.484	0.405163
CFHR4	rs4915559		Emilsson	Wald ratio	1	0.003	0.041	0.935298	1.003	0.925	1.088	intron_variant	MODIFIER	CFHR4	protein_coding	-	-	2.204	0.112354
RMDN1.7096.30.3	rs11781016		Sun	Wald ratio	1	-0.006	0.074	0.93556	0.994	0.859	1.15	intron_variant	MODIFIER	CPNE3	protein_coding	-	-	8.951	0.754207
IL-1ra	rs6734238		Folkersen	Wald ratio	1	-0.01	0.119	0.936103	0.991	0.785	1.25	upstream_gene_variant	MODIFIER	RNU6-1180P	snRNA	-	-	0.778	-0.113414
CHI3L1	rs4950931		Folkersen	Wald ratio	1	0.003	0.043	0.936786	1.003	0.922	1.092	intergenic_variant	MODIFIER	-	-	-	-	0.574	-0.176312
GRAMD1C	rs4422272		Emilsson	Wald ratio	1	-0.003	0.042	0.938685	0.997	0.918	1.083	intron_variant	MODIFIER	GRAMD1C	protein_coding	-	-	9.839	0.843975
MMP-12	rs72987587		Folkersen	Wald ratio	1	0.018	0.238	0.939419	1.018	0.639	1.624	intergenic_variant	MODIFIER	-	-	-	-	1.218	-0.019492
NAGK.3894.15.2	rs7606102		Sun	Wald ratio	1	0.006	0.074	0.940401	1.006	0.869	1.163	intron_variant,non_coding_transcript_variant	MODIFIER	-	lncRNA	-	-	3.678	0.24778
PPIF	rs57559820		Emilsson	Wald ratio	1	0.014	0.197	0.941541	1.015	0.689	1.494	intron_variant	MODIFIER	ZCCHC24	protein_coding	-	-	1.091	-0.042556
SIGLEC6	rs2305771		Emilsson	Wald ratio	1	-0.003	0.047	0.941837	0.997	0.91	1.092	intron_variant	MODIFIER	SIGLEC6	protein_coding	-	-	0.374	-0.262954
POSTN	rs962462		Emilsson	Wald ratio	1	-0.007	0.101	0.941906	0.993	0.814	1.21	intergenic_variant	MODIFIER	-	-	-	-	4.138	0.287074
ESM-1	rs4865884		Folkersen	Wald ratio	1	-0.015	0.207	0.943691	0.985	0.657	1.478	TF_binding_site_variant	MODIFIER	-	-	-	-	0.134	-0.475611
C8G	rs11790360		Emilsson	Wald ratio	1	0.006	0.09	0.944514	1.006	0.843	1.201	non_coding_transcript_exon_variant	MODIFIER	LINC02692	lncRNA	-	-	0.579	-0.174609
LAMA1.LAMB1.LAMC1.2728.62.2	rs4129858		Sun	Wald ratio	1	0.005	0.08	0.945718	1.005	0.86	1.176	intron_variant	MODIFIER	LAMC1	protein_coding	-	-	1.685	0.050666
CHST9	rs7233634		Emilsson	Wald ratio	1	0.006	0.089	0.945786	1.006	0.845	1.199	intron_variant	MODIFIER	CHST9	protein_coding	-	-	6.096	0.461383
CPB2	rs3742264		Suhre	Wald ratio	1	0.002	0.0294	0.945786	1.002	0.9458	1.0615	missense_variant	MODERATE	CPB2	protein_coding	tolerated(0.71)	benign(0)	11.1	0.958297
SAA1	rs1993373		Suhre	Wald ratio	1	-0.002	0.0297	0.947237	0.998	0.9417	1.0578	upstream_gene_variant	MODIFIER	ST13P5	processed_pseudogene	-	-	2.185	0.11035
IGFBP3	rs2949833		Suhre	Wald ratio	1	-0.004	0.0603	0.947464	0.996	0.885	1.121	intron_variant,non_coding_transcript_variant	MODIFIER	-	lncRNA	-	-	8.257	0.678559
PLAU	rs2227564		Emilsson	Wald ratio	1	-0.004	0.067	0.947812	0.996	0.874	1.135	missense_variant	MODERATE	PLAU	protein_coding	tolerated(0.12)	benign(0)	8.415	0.695616
PNKP	rs56131457		Emilsson	Wald ratio	1	-0.014	0.22	0.94858	0.986	0.64	1.518	intron_variant	MODIFIER	NUP62	protein_coding	-	-	5.598	0.41549
CRP.4337.49.2	rs2808628		Sun	Wald ratio	1	-0.009	0.138	0.949173	0.991	0.756	1.299	upstream_gene_variant	MODIFIER	CRPP1	unprocessed_pseudogene	-	-	2.571	0.149539
BCAN.3461.58.1	rs41267397		Sun	Wald ratio	1	-0.007	0.113	0.95023	0.993	0.795	1.24	missense_variant	MODERATE	BCAN	protein_coding	deleterious(0)	probably_damaging(0.999)	32	4.51691
SERPINA4	rs882732		Suhre	Wald ratio	1	0.0025	0.0409	0.950347	1.0026	0.9253	1.0863	upstream_gene_variant	MODIFIER	SERPINA4	protein_coding	-	-	1.142	-0.033038
IL1RL2.2994.71.2	rs2228139		Sun	Wald ratio	1	-0.007	0.108	0.951251	0.993	0.804	1.227	missense_variant	MODERATE	IL1R1	protein_coding	tolerated(1)	benign(0)	1.286	-0.008033
ISM2	rs28608714		Emilsson	Wald ratio	1	0.014	0.236	0.952156	1.014	0.638	1.612	intron_variant	MODIFIER	SPTLC2	protein_coding	-	-	2.392	0.131892
FCGR2A	rs7535475		Emilsson	Wald ratio	1	-0.001	0.023	0.953289	0.999	0.955	1.045	intergenic_variant	MODIFIER	-	-	-	-	2.405	0.133264
FGF7	rs36023246		Emilsson	Wald ratio	1	0.01	0.173	0.953289	1.01	0.719	1.418	intron_variant	MODIFIER	FAM227B	protein_coding	-	-	12.89	1.11229
KLKB1	rs1511802		Suhre	Wald ratio	1	0.0029	0.0504	0.953483	1.0029	0.9086	1.1071	intron_variant	MODIFIER	KLKB1	protein_coding	-	-	3.696	0.249314
FAM20A	rs4968917		Emilsson	Wald ratio	1	0.011	0.19	0.953772	1.011	0.697	1.466	intron_variant,non_coding_transcript_variant	MODIFIER	LINC01482	lncRNA	-	-	0.457	-0.222586
CPB2	rs4942471		Emilsson	Wald ratio	1	0.002	0.043	0.955342	1.002	0.921	1.091	intron_variant	MODIFIER	CPB2	protein_coding	-	-	8.741	0.73128
DUT	rs117540572		Emilsson	Wald ratio	1	0.012	0.214	0.95594	1.012	0.666	1.538	intergenic_variant	MODIFIER	-	-	-	-	1.723	0.055709
CPXM1	rs13043754		Emilsson	Wald ratio	1	-0.003	0.052	0.956159	0.997	0.901	1.103	upstream_gene_variant	MODIFIER	CPXM1	protein_coding	-	-	5.701	0.424908
NFASC.7179.69.3	rs6667532		Sun	Wald ratio	1	-0.003	0.046	0.956159	0.997	0.911	1.092	synonymous_variant	LOW	NFASC	protein_coding	-	-	3.593	0.240466
PDGFD.9341.1.3	rs7950273		Sun	Wald ratio	1	0.005	0.095	0.957058	1.005	0.835	1.21	intron_variant	MODIFIER	PDGFD	protein_coding	-	-	0.051	-0.670124
KLK12	rs8103941		Suhre	Wald ratio	1	-0.002	0.0378	0.957124	0.998	0.9268	1.0746	upstream_gene_variant	MODIFIER	-	lncRNA	-	-	3.54	0.235979
SPINK5	rs2052536		Emilsson	Wald ratio	1	0.008	0.159	0.960288	1.008	0.739	1.375	intron_variant	MODIFIER	SPINK5	protein_coding	-	-	0.587	-0.171916
FAM171B	rs76851721		Emilsson	Wald ratio	1	-0.003	0.068	0.960545	0.997	0.872	1.139	intergenic_variant	MODIFIER	-	-	-	-	6.923	0.540661
CCL23.3028.36.2	rs712048		Sun	Wald ratio	1	0.002	0.047	0.960813	1.002	0.913	1.1	intron_variant	MODIFIER	CCL15	protein_coding	-	-	0.27	-0.329802
KLK7	rs1722558		Emilsson	Wald ratio	1	-0.005	0.113	0.961229	0.995	0.797	1.241	intron_variant	MODIFIER	KLK7	protein_coding	-	-	5.772	0.431354
SMOC1	rs749396		Emilsson	Wald ratio	1	-0.011	0.22	0.961623	0.989	0.643	1.524	upstream_gene_variant	MODIFIER	SMOC1	protein_coding	-	-	5.466	0.403581
SPINT2	rs8112211		Suhre	Wald ratio	1	-0.0014	0.0287	0.96188	0.9986	0.944	1.0565	downstream_gene_variant	MODIFIER	KCNK6	protein_coding	-	-	1.044	-0.051822
SPTLC2	rs151207248		Emilsson	Wald ratio	1	-0.01	0.202	0.962136	0.99	0.666	1.472	intron_variant	MODIFIER	ISM2	protein_coding	-	-	1.078	-0.045079
IGFBP4	rs495511	rs532299	Emilsson	Wald ratio	1	-0.011	0.24	0.962149	0.989	0.618	1.582
C9.3060.43.2	rs62358364		Sun	Wald ratio	1	0.004	0.09	0.96252	1.004	0.841	1.199	intron_variant	MODIFIER	C9	protein_coding	-	-	0.283	-0.320077
NEGR1	rs2220253		Emilsson	Wald ratio	1	0.007	0.159	0.962666	1.007	0.738	1.375	intron_variant	MODIFIER	NEGR1	protein_coding	-	-	0.198	-0.394213
ANG	rs17114671		Suhre	Wald ratio	1	0.0021	0.0457	0.963154	1.0021	0.9163	1.0959	intron_variant	MODIFIER	RNASE4	protein_coding	-	-	2.232	0.115351
FAM171B.8851.42.3	rs10931256		Sun	Wald ratio	1	-0.004	0.085	0.96349	0.996	0.843	1.177	intergenic_variant	MODIFIER	-	-	-	-	7.104	0.55854
CDH1	rs4783682		Emilsson	Wald ratio	1	0.011	0.237	0.963745	1.011	0.635	1.609	intron_variant	MODIFIER	CDH1	protein_coding	-	-	1.949	0.083658
SERPINA11	rs17090881		Emilsson	Wald ratio	1	0.005	0.109	0.96455	1.005	0.811	1.245	intron_variant	MODIFIER	SERPINA11	protein_coding	-	-	3.938	0.269908
GFRAL.6920.1.3	rs72975088		Sun	Wald ratio	1	-0.006	0.131	0.965428	0.994	0.769	1.285	intergenic_variant	MODIFIER	-	-	-	-	2.03	0.093077
CD59	rs831636		Emilsson	Wald ratio	1	-0.006	0.134	0.965457	0.994	0.764	1.294	intron_variant	MODIFIER	-	protein_coding	-	-	0.748	-0.121648
TNFRSF21	rs9463326		Emilsson	Wald ratio	1	0.011	0.254	0.965693	1.011	0.615	1.662	regulatory_region_variant	MODIFIER	-	open_chromatin_region	-	-	3.325	0.217514
QPCTL.8866.53.3	rs17850756		Sun	Wald ratio	1	-0.004	0.097	0.965815	0.996	0.823	1.205	missense_variant	MODERATE	QPCTL	protein_coding	deleterious(0)	probably_damaging(0.999)	16.96	1.69001
AOC1	rs10452848		Emilsson	Wald ratio	1	-0.001	0.031	0.965913	0.999	0.941	1.06	splice_region_variant,intron_variant	LOW	AOC1	protein_coding	-	-	4.473	0.315889
FUT5	rs10420107		Emilsson	Wald ratio	1	0.002	0.045	0.96822	1.002	0.917	1.094	downstream_gene_variant	MODIFIER	NRTN	protein_coding	-	-	2.188	0.110681
FUT5.4549.78.2	rs778809	rs10420107	Sun	Wald ratio	1	0.002	0.043	0.96822	1.002	0.92	1.09
VWA2	rs11595697		Emilsson	Wald ratio	1	0.003	0.088	0.968513	1.003	0.844	1.193	intron_variant	MODIFIER	CCDC186	protein_coding	-	-	0.55	-0.185186
GJD2	rs518930		Emilsson	Wald ratio	1	-0.009	0.24	0.970086	0.991	0.619	1.586	intergenic_variant	MODIFIER	-	-	-	-	0.174	-0.42029
B4GALT2.9595.11.3	rs2286241		Sun	Wald ratio	1	-0.003	0.077	0.97057	0.997	0.858	1.159	synonymous_variant	LOW	ATP6V0B	protein_coding	-	-	14.33	1.29146
CCL14	rs41341749		Suhre	Wald ratio	1	-0.0016	0.0445	0.970909	0.9984	0.915	1.0894	upstream_gene_variant	MODIFIER	CCL16	protein_coding	-	-	2.964	0.185896
CCL23	rs41341749		Suhre	Wald ratio	1	0.0018	0.0505	0.970909	1.0018	0.9075	1.106	upstream_gene_variant	MODIFIER	CCL16	protein_coding	-	-	2.964	0.185896
FAM151A.7856.51.3	rs11206397		Sun	Wald ratio	1	0.003	0.093	0.970934	1.003	0.836	1.204	upstream_gene_variant	MODIFIER	-	lncRNA	-	-	2.489	0.141556
PXDN	rs34008669		Emilsson	Wald ratio	1	-0.005	0.153	0.973519	0.995	0.738	1.342	intron_variant	MODIFIER	PXDN	protein_coding	-	-	2.914	0.181366
AP1G2	rs12897422		Emilsson	Wald ratio	1	0.004	0.124	0.973648	1.004	0.787	1.281	missense_variant	MODERATE	AP1G2	protein_coding	deleterious(0)	probably_damaging(0.944)	26	3.84044
IGLL1.6485.59.3	rs139571703		Sun	Wald ratio	1	0.003	0.106	0.973998	1.003	0.816	1.234	missense_variant	MODERATE	IGLL1	protein_coding	tolerated_low_confidence(0.06)	possibly_damaging(0.898)	17.11	1.71213
MFAP2	rs2235932		Emilsson	Wald ratio	1	0.004	0.14	0.974472	1.004	0.764	1.321	downstream_gene_variant	MODIFIER	CROCC	protein_coding	-	-	1.042	-0.052194
WFIKKN2	rs3803884		Suhre	Wald ratio	1	-0.0014	0.0449	0.974775	0.9986	0.9144	1.0905	3_prime_UTR_variant	MODIFIER	WFIKKN2	protein_coding	-	-	0.503	-0.203199
LRRC15	rs923931		Emilsson	Wald ratio	1	0.003	0.092	0.976599	1.003	0.837	1.201	intron_variant	MODIFIER	LRRC15	protein_coding	-	-	5.09	0.369922
CNTNAP2	rs6943324		Emilsson	Wald ratio	1	0.004	0.122	0.976828	1.004	0.791	1.274	intergenic_variant	MODIFIER	-	-	-	-	0.116	-0.504098
WFIKKN2.3235.50.2	rs11079936		Sun	Wald ratio	1	-0.001	0.042	0.977751	0.999	0.92	1.084	upstream_gene_variant	MODIFIER	WFIKKN2	protein_coding	-	-	0.021	-0.831047
TIRAP	rs111577916		Emilsson	Wald ratio	1	0.003	0.116	0.979031	1.003	0.8	1.258	downstream_gene_variant	MODIFIER	RPUSD4	protein_coding	-	-	3.161	0.203307
TIRAP.9839.148.3	rs111577916		Sun	Wald ratio	1	0.004	0.147	0.979031	1.004	0.753	1.338	downstream_gene_variant	MODIFIER	RPUSD4	protein_coding	-	-	3.161	0.203307
IFNAR1	rs2257167		Emilsson	Wald ratio	1	-0.002	0.078	0.979067	0.998	0.857	1.162	missense_variant	MODERATE	IFNAR1	protein_coding	tolerated(0.17)	benign(0.417)	13.25	1.15257
BPGM	rs2161802		Emilsson	Wald ratio	1	0.006	0.215	0.979544	1.006	0.66	1.532	intron_variant	MODIFIER	BPGM	protein_coding	-	-	6.391	0.489199
COL6A3	rs2646260		Emilsson	Wald ratio	1	0.006	0.234	0.979912	1.006	0.636	1.59	missense_variant	MODERATE	COL6A3	protein_coding	deleterious(0.02)	probably_damaging(0.934)	14.83	1.36332
DPY30	rs7596656		Emilsson	Wald ratio	1	0.006	0.235	0.980055	1.006	0.634	1.595	intron_variant	MODIFIER	SPAST	protein_coding	-	-	1.467	0.02025
TMEM132A	rs555835		Emilsson	Wald ratio	1	-0.001	0.042	0.980138	0.999	0.919	1.086	synonymous_variant	LOW	TMEM109	protein_coding	-	-	0.204	-0.387744
LRRC4C	rs998447		Emilsson	Wald ratio	1	-0.004	0.177	0.980301	0.996	0.703	1.41	intron_variant	MODIFIER	LRRC4C	protein_coding	-	-	4.287	0.299801
KLC1	rs56168984		Emilsson	Wald ratio	1	-0.005	0.224	0.980929	0.995	0.641	1.543	intron_variant	MODIFIER	ZFYVE21	protein_coding	-	-	0.705	-0.134024
LEPR	rs6658330		Emilsson	Wald ratio	1	-0.001	0.022	0.981446	0.999	0.958	1.043	intron_variant	MODIFIER	LEPR	protein_coding	-	-	0.954	-0.070687
CRHBP	rs6414971		Emilsson	Wald ratio	1	-0.001	0.051	0.981589	0.999	0.904	1.104	intron_variant	MODIFIER	S100Z	protein_coding	-	-	5.854	0.438958
A1M	rs141738059		Yao	Wald ratio	1	0.005	0.202	0.981929	1.005	0.676	1.493	missense_variant	MODERATE	AMBP	protein_coding	deleterious(0.02)	benign(0.417)	27	3.99683
FCGR2A	rs17413015		Suhre	Wald ratio	1	-0.0005	0.0234	0.982493	0.9995	0.9546	1.0465	intron_variant	MODIFIER	FCGR2B	protein_coding	-	-	0.72	-0.129541
PCSK7.4459.68.2	rs199605734	rs10790174	Sun	Wald ratio	1	-0.002	0.089	0.982843	0.998	0.838	1.189
MTHFS.14107.1.3	rs7173566		Sun	Wald ratio	1	0.002	0.115	0.983718	1.002	0.8	1.256	intron_variant	MODIFIER	ST20	protein_coding	-	-	5.486	0.405397
PCSK7	rs6589598		Emilsson	Wald ratio	1	-0.001	0.028	0.983773	0.999	0.945	1.057	upstream_gene_variant	MODIFIER	-	unprocessed_pseudogene	-	-	8.623	0.718396
THBS4	rs35351529		Emilsson	Wald ratio	1	0.003	0.136	0.984201	1.003	0.769	1.308	regulatory_region_variant	MODIFIER	-	promoter_flanking_region	-	-	1.71	0.053926
LMNB1	rs36105360		Emilsson	Wald ratio	1	-0.003	0.136	0.984274	0.997	0.764	1.302	missense_variant	MODERATE	LMNB1	protein_coding	deleterious(0)	benign(0.011)	24.1	3.30205
LMNB1.3889.64.2	rs36105360		Sun	Wald ratio	1	-0.002	0.095	0.984274	0.998	0.829	1.202	missense_variant	MODERATE	LMNB1	protein_coding	deleterious(0)	benign(0.011)	24.1	3.30205
BDNF	rs728635		Emilsson	Wald ratio	1	0.003	0.163	0.98598	1.003	0.729	1.38	intron_variant,non_coding_transcript_variant	MODIFIER	-	lncRNA	-	-	5.368	0.39474
SEMA4D	rs45464494		Emilsson	Wald ratio	1	-0.001	0.036	0.986185	0.999	0.931	1.073	missense_variant	MODERATE	SEMA4D	protein_coding	tolerated(0.48)	benign(0.003)	8.968	0.755962
PLXDC2	rs11011369		Emilsson	Wald ratio	1	-0.004	0.218	0.986303	0.996	0.65	1.527	intron_variant,non_coding_transcript_variant	MODIFIER	MALRD1	processed_transcript	-	-	3.268	0.212583
CD109.3290.50.2	rs6903575		Sun	Wald ratio	1	-0.001	0.056	0.986362	0.999	0.894	1.116	intron_variant	MODIFIER	CD109	protein_coding	-	-	0.099	-0.536661
LRRC15.6557.50.3	rs57514363		Sun	Wald ratio	1	0.001	0.064	0.989474	1.001	0.883	1.134	intron_variant	MODIFIER	LRRC15	protein_coding	-	-	3.617	0.242526
DPT	rs1018454		Emilsson	Wald ratio	1	0.001	0.083	0.9899	1.001	0.851	1.177	intron_variant	MODIFIER	DPT	protein_coding	-	-	8.143	0.666296
DPT.4979.34.2	rs1018454		Sun	Wald ratio	1	0.001	0.057	0.9899	1.001	0.895	1.119	intron_variant	MODIFIER	DPT	protein_coding	-	-	8.143	0.666296
ATP1B2	rs35119871		Emilsson	Wald ratio	1	-0.002	0.128	0.990539	0.998	0.777	1.283	downstream_gene_variant	MODIFIER	TP53	protein_coding	-	-	3.004	0.189464
ZG16B	rs2190809		Emilsson	Wald ratio	1	-0.002	0.164	0.99065	0.998	0.724	1.377	intron_variant	MODIFIER	ZG16B	protein_coding	-	-	0.045	-0.692297
HBZ.6919.3.3	rs2461286		Sun	Wald ratio	1	0	0.029	0.990686	1	0.945	1.059	intron_variant	MODIFIER	HBZ	protein_coding	-	-	0.427	-0.236032
MIA	rs1455434		Suhre	Wald ratio	1	0.0005	0.0504	0.991451	1.0005	0.9064	1.1044	upstream_gene_variant	MODIFIER	SNRPA	protein_coding	-	-	9.979	0.85751
BMP6	rs12194931		Emilsson	Wald ratio	1	0.002	0.218	0.992203	1.002	0.654	1.536	upstream_gene_variant	MODIFIER	TXNDC5	protein_coding	-	-	0.955	-0.070487
HAPLN4	rs56212061		Emilsson	Wald ratio	1	-0.002	0.196	0.99268	0.998	0.68	1.465	intron_variant	MODIFIER	SUGP1	protein_coding	-	-	5.274	0.386266
CCDC126.6388.21.3	rs227934		Sun	Wald ratio	1	0.001	0.088	0.993379	1.001	0.843	1.188	upstream_gene_variant	MODIFIER	CLK2P1	processed_pseudogene	-	-	0.852	-0.094283
TIMP2	rs2376999		Emilsson	Wald ratio	1	0	0.089	0.99571	1	0.84	1.19	intron_variant	MODIFIER	TIMP2	protein_coding	-	-	4.93	0.355792
KLKB1	rs12639909		Yao	Wald ratio	1	-0.001	0.123	0.995919	0.999	0.785	1.273	downstream_gene_variant	MODIFIER	CYP4V2	protein_coding	-	-	11.56	0.995352
CD109	rs6909201		Emilsson	Wald ratio	1	0	0.044	0.99659	1	0.918	1.09	intron_variant	MODIFIER	CD109	protein_coding	-	-	1.606	0.040014
MXRA7.8005.1.3	rs9900613		Sun	Wald ratio	1	0	0.103	0.996633	1	0.817	1.225	downstream_gene_variant	MODIFIER	MXRA7	protein_coding	-	-	0.686	-0.139768
FAM213A.13423.94.3	rs10887868		Sun	Wald ratio	1	-0.001	0.127	0.996662	0.999	0.779	1.282	3_prime_UTR_variant	MODIFIER	PRXL2A	protein_coding	-	-	0.218	-0.373966
MMP13		rs112794210	Emilsson	Wald ratio	1	0.0673036	0.239278	0.778497	1.06962	0.669194	1.70965	3_prime_UTR_variant	MODIFIER	DCUN1D5	protein_coding	-	-	0.002	-1.21717
MMP1	rs484915		Suhre	Wald ratio	1	-0.0202783	0.0481113	0.673399	0.979926	0.891744	1.07683	upstream_gene_variant	MODIFIER	MMP1	protein_coding	-	-	4.693	0.334999
NCAM	rs11214309		Yao	Wald ratio	1	0.0256579	0.205921	0.90084	1.02599	0.685267	1.53613	intron_variant,non_coding_transcript_variant	MODIFIER	-	lncRNA	-	-	0.086	-0.567209
CLEC1B	rs544605		Emilsson	Wald ratio	1	0	0.053	0.997023	1	0.901	1.11	intron_variant	MODIFIER	CLEC1B	protein_coding	-	-	1.413	0.01203
CCL3	rs1634517		Folkersen	Wald ratio	1	0	0.069	0.997099	1	0.874	1.144	intron_variant	MODIFIER	CCL4	protein_coding	-	-	0.2	-0.392206
FCGR2B	rs17413015		Suhre	Wald ratio	1	-0.0005	0.0234	0.982493	0.9995	0.9546	1.0465	intron_variant	MODIFIER	FCGR2B	protein_coding	-	-	0.72	-0.129541
REG1A	rs11126696		Yao	Wald ratio	1	0	0.091	1	1	0.836	1.196	intergenic_variant	MODIFIER	-	-	-	-	0.707	-0.133543
MR denotes to Mendelian Randomization
CADD denotes to Combined Annotation Dependent Depletion
CADD score > 10 indicates that 10% most deleterious , > 20 indicates the 1% most deleterious and so on
PHRED-scaled" values by expressing the rank in order of magnitude terms rather than the precise rank itself.
RAW-scaled are interpretable as the extent to which the annotation profile for a given variant suggests that the variant is likely to be "observed" (negative values) vs "simulated" (positive values).
Yellow highlights demonstrates all SNPs that are previously studies with type 1 diabetes loci

## Sheet: Table S3-SIRPG-rs2281808
Table S3. Associations of eQTL rs2281808 (cis-pQTL for SIRPG) with SIRPG expression (A) and with other traits (B) using phenoscanner
Table S3A
snp	rsid	hg19_coordinates	hg38_coordinates	a1	a2	trait	efo	study	pmid	ancestry	year	tissue	exp_gene	exp_ensembl	probe	beta	se	p	direction	n	n_studies	dataset
rs2281808	rs2281808	chr20:1610551	chr20:1629905	C	T	Gene expression	NCIT_C16608	BIOSQTL	27918533	European	2017	Whole blood	RP11-77C3.3	ENSG00000237914	ENSG00000237914	NA	NA	7.725e-41	-	2116	1	BIOSQTL_eQTL_EUR_2017
rs2281808	rs2281808	chr20:1610551	chr20:1629905	C	T	Gene expression	NCIT_C16608	BIOSQTL	27918533	European	2017	Whole blood	SIRPG	ENSG00000089012	ENSG00000089012	NA	NA	3.559e-17	+	2116	1	BIOSQTL_eQTL_EUR_2017
rs2281808	rs2281808	chr20:1610551	chr20:1629905	C	T	Gene expression	NCIT_C16608	BIOSQTL	27918533	European	2017	Whole blood	SIRPB1	ENSG00000101307	ENSG00000101307	NA	NA	1.319e-14	+	2116	1	BIOSQTL_eQTL_EUR_2017
rs2281808	rs2281808	chr20:1610551	chr20:1629905	C	T	Gene expression	NCIT_C16608	BIOSQTL	27918533	European	2017	Whole blood	SIRPB1;RP4-576H24.4	ENSG00000101307;ENSG00000260861	ENSG00000101307;ENSG00000260861	NA	NA	1.886e-14	+	2116	1	BIOSQTL_eQTL_EUR_2017
rs2281808	rs2281808	chr20:1610551	chr20:1629905	C	T	Gene expression	NCIT_C16608	BIOSQTL	27918533	European	2017	Whole blood	FKBP1A	ENSG00000088832	ENSG00000088832	NA	NA	8.563e-06	+	2116	1	BIOSQTL_eQTL_EUR_2017
rs2281808	rs2281808	chr20:1610551	chr20:1629905	C	T	Gene expression	NCIT_C16608	BLUEPRINT	27863251	European	2016	T cells	SIRPB1	ENSG00000101307.11	-	0.6438	0.1098	4.578e-09	+	169	1	BLUEPRINT_eQTL_EUR_2016
rs2281808	rs2281808	chr20:1610551	chr20:1629905	C	T	Gene expression	NCIT_C16608	BLUEPRINT	27863251	European	2016	T cells	-	ENSG00000237914.1	-	-0.9298	0.1025	1.182e-19	-	169	1	BLUEPRINT_eQTL_EUR_2016
rs2281808	rs2281808	chr20:1610551	chr20:1629905	C	T	Gene expression	NCIT_C16608	Fehrmann	21829388	European	2011	Blood	SIRPB1	-	-	NA	NA	1.4e-17	NA	1469	1	GRASP
rs2281808	rs2281808	chr20:1610551	chr20:1629905	C	T	Gene expression	NCIT_C16608	Fehrmann	21829388	European	2011	Blood	SIRPG	-	-	NA	NA	2e-68	NA	1469	1	GRASP
rs2281808	rs2281808	chr20:1610551	chr20:1629905	C	T	Gene expression	NCIT_C16608	Mehta	22692066	European	2012	Whole blood	SIRPG	-	-	NA	NA	1.97e-33	NA	322	1	GRASP
rs2281808	rs2281808	chr20:1610551	chr20:1629905	C	T	Gene expression	NCIT_C16608	GTEx	25954001	Unspecified	2015	Testis	-	ENSG00000237914.1	-	0.5598	0.09301	1.938e-08	+	157	1	GTEx-V6p_eQTL_EUR_2016
rs2281808	rs2281808	chr20:1610551	chr20:1629905	C	T	Gene expression	NCIT_C16608	GTEx	25954001	Unspecified	2015	Testis	-	ENSG00000237914.1	-	0.4754	0.05234	1.462e-16	+	225	1	GTEx-V7_eQTL_EUR_2017
rs2281808	rs2281808	chr20:1610551	chr20:1629905	C	T	Gene expression	NCIT_C16608	Joehanes R	28122634	Mixed	2017	Whole blood	SIRPB1;LOC100653231;LOC100653194	-	3894727	0.0234	0.00219	1.799e-26	+	5257	1	Joehanes-R_eQTL_EUR_2017
rs2281808	rs2281808	chr20:1610551	chr20:1629905	C	T	Gene expression	NCIT_C16608	Joehanes R	28122634	Mixed	2017	Whole blood	NSFL1C	-	3894637	0.0137	0.00237	7.965e-09	+	5257	1	Joehanes-R_eQTL_EUR_2017
rs2281808	rs2281808	chr20:1610551	chr20:1629905	C	T	Gene expression	NCIT_C16608	Joehanes R	28122634	Mixed	2017	Whole blood	SIRPG;SIRPA	-	3894765	0.0238	0.00437	5.563e-08	+	5257	1	Joehanes-R_eQTL_EUR_2017
rs2281808	rs2281808	chr20:1610551	chr20:1629905	C	T	Gene expression	NCIT_C16608	Joehanes R	28122634	Mixed	2017	Whole blood	SIRPD	-	3894699	0.0158	0.00331	1.913e-06	+	5257	1	Joehanes-R_eQTL_EUR_2017
rs2281808	rs2281808	chr20:1610551	chr20:1629905	C	T	Gene expression	NCIT_C16608	Westra H	24013639	European	2013	Peripheral blood	SIRPG	-	2680050	NA	NA	6.893e-123	NA	5311	1	Westra-H_eQTL_EUR_2013
rs2281808	rs2281808	chr20:1610551	chr20:1629905	C	T	Gene expression	NCIT_C16608	Westra H	24013639	European	2013	Peripheral blood	NSFL1C	-	7320328	NA	NA	1.338e-07	NA	5311	1	Westra-H_eQTL_EUR_2013
rs2281808	rs2281808	chr20:1610551	chr20:1629905	C	T	Gene expression	NCIT_C16608	Westra H	24013639	European	2013	Peripheral blood	NSFL1C	-	5900441	NA	NA	4.11e-07	NA	5311	1	Westra-H_eQTL_EUR_2013
rs2281808	rs2281808	chr20:1610551	chr20:1629905	C	T	Gene expression	NCIT_C16608	eQTLGen	eQTLGen	European	2018	Whole blood	RP11-77C3.3	ENSG00000237914	-	NA	NA	4.11e-120	-	4987	12	eQTLGen_eQTL_EUR_2018
rs2281808	rs2281808	chr20:1610551	chr20:1629905	C	T	Gene expression	NCIT_C16608	eQTLGen	eQTLGen	European	2018	Whole blood	SIRPG	ENSG00000089012	-	NA	NA	2.06e-89	-	30429	34	eQTLGen_eQTL_EUR_2018
rs2281808	rs2281808	chr20:1610551	chr20:1629905	C	T	Gene expression	NCIT_C16608	eQTLGen	eQTLGen	European	2018	Whole blood	FKBP1A	ENSG00000088832	-	NA	NA	8.01e-13	+	26103	34	eQTLGen_eQTL_EUR_2018
rs2281808	rs2281808	chr20:1610551	chr20:1629905	C	T	Gene expression	NCIT_C16608	eQTLGen	eQTLGen	European	2018	Whole blood	SIRPB1	ENSG00000101307	-	NA	NA	1.21e-10	+	30215	33	eQTLGen_eQTL_EUR_2018
rs2281808	rs2281808	chr20:1610551	chr20:1629905	C	T	Gene expression	NCIT_C16608	eQTLGen	eQTLGen	European	2018	Whole blood	SIRPB2	ENSG00000196209	-	NA	NA	3.63e-09	+	30865	32	eQTLGen_eQTL_EUR_2018
Table S3B
SNP	RSID	Pos (hg19)	Alleles	trait	efo	study	PMID	Ancestry	year	beta	se	p	direction	n	n_cases	n_controls	n_studies	unit	dataset
rs2281808	rs2281808	chr20:1610551	C/T	Mean platelet volume	EFO_0004586	Astle W	27863252	European	2016	-0.0188	0.003758	5.675e-07	-	173480	0	173480	2	IVNT	Astle-W_Blood-Cell-Traits_EUR_2016
rs2281808	rs2281808	chr20:1610551	C/T	Waist hip ratio in females	EFO_0004343	GIANT	23754948	European	2013	-0.037	0.0076	9.91e-07	-	42728	0	42728	46	IVNT	GIANT_WHR-F_EUR_2013
rs2281808	rs2281808	chr20:1610551	C/T	Selective immunoglobulin A deficiency IgAD	EFO_1001929	Ferreira RC	20694011	European	2010	NA	NA	1.2e-11	NA	1520	-	-	-	-	GRASP
rs2281808	rs2281808	chr20:1610551	C/T	Type 1 diabetes	EFO_0001359	Barrett JC	19430480	European	2009	NA	NA	1.2e-11	NA	16559	-	-	-	-	GRASP
rs2281808	rs2281808	chr20:1610551	C/T	Type 1 diabetes	EFO_0001359	Bradfield JP	21980299	European	2011	NA	NA	2.06e-06	NA	26890	-	-	-	-	GRASP
rs2281808	rs2281808	chr20:1610551	C/T	Type 1 diabetes	EFO_0001359	Barrett JC	19430480	European	2009	NA	NA	1e-11	NA	-	-	-	-	-	NHGRI-EBI_GWAS_Catalog
rs2281808	rs2281808	chr20:1610551	C/T	Diabetes mellitus type 1	EFO_0001359;EFO_0000400	Barrett JC	19430480	European	2009	NA	NA	1e-11	NA	-	-	-	-	-	dbGaP

## Sheet: Table S4-SIRPG-rs6043409
Table S4. Associations of eQTL rs6043409 (cis-pQTL for SIRPG) with SIRPG expression (A) and with other traits (B) using Phenoscanner
Table S4A
SNP	RSID	Pos (hg19)	hg38_coordinates	Alleles	trait	efo	study	PMID	Ancestry	year	tissue	exp_gene	exp_ensembl	probe	beta	se	p	direction	n	n_studies	dataset
rs6043409	rs6043409	chr20:1616206	chr20:1635560	A/G	Exon expression	NCIT_C16608	BIOSQTL	27918533	European	2017	Whole blood	SIRPG	ENSG00000089012	chr_20_1616834_1617151	NA	NA	6.013e-285	-	2116	1	BIOSQTL_eQTL_EUR_2017
rs6043409	rs6043409	chr20:1616206	chr20:1635560	A/G	Exon expression	NCIT_C16608	BIOSQTL	27918533	European	2017	Whole blood	SIRPG	ENSG00000089012	chr_20_1615913_1616245	NA	NA	1.441e-189	-	2116	1	BIOSQTL_eQTL_EUR_2017
rs6043409	rs6043409	chr20:1616206	chr20:1635560	A/G	Gene expression	NCIT_C16608	BIOSQTL	27918533	European	2017	Whole blood	RP11-77C3.3	ENSG00000237914	ENSG00000237914	NA	NA	2.619e-45	+	2116	1	BIOSQTL_eQTL_EUR_2017
rs6043409	rs6043409	chr20:1616206	chr20:1635560	A/G	Gene expression	NCIT_C16608	BIOSQTL	27918533	European	2017	Whole blood	SIRPG	ENSG00000089012	ENSG00000089012	NA	NA	1.573e-16	-	2116	1	BIOSQTL_eQTL_EUR_2017
rs6043409	rs6043409	chr20:1616206	chr20:1635560	A/G	Gene expression	NCIT_C16608	BIOSQTL	27918533	European	2017	Whole blood	SIRPB1	ENSG00000101307	ENSG00000101307	NA	NA	6.819e-15	-	2116	1	BIOSQTL_eQTL_EUR_2017
rs6043409	rs6043409	chr20:1616206	chr20:1635560	A/G	Gene expression	NCIT_C16608	BIOSQTL	27918533	European	2017	Whole blood	SIRPB1;RP4-576H24.4	ENSG00000101307;ENSG00000260861	ENSG00000101307;ENSG00000260861	NA	NA	1.455e-14	-	2116	1	BIOSQTL_eQTL_EUR_2017
rs6043409	rs6043409	chr20:1616206	chr20:1635560	A/G	Gene expression	NCIT_C16608	BLUEPRINT	27863251	European	2016	T cells	SIRPB1	ENSG00000101307.11	-	-0.637	0.1109	9.129e-09	-	169	1	BLUEPRINT_eQTL_EUR_2016
rs6043409	rs6043409	chr20:1616206	chr20:1635560	A/G	Gene expression	NCIT_C16608	BLUEPRINT	27863251	European	2016	T cells	-	ENSG00000237914.1	-	0.954	0.1027	1.561e-20	+	169	1	BLUEPRINT_eQTL_EUR_2016
rs6043409	rs6043409	chr20:1616206	chr20:1635560	A/G	Gene expression	NCIT_C16608	GTEx	25954001	Unspecified	2015	Testis	-	ENSG00000237914.1	-	-0.573	0.09036	4.09e-09	-	157	1	GTEx-V6p_eQTL_EUR_2016
rs6043409	rs6043409	chr20:1616206	chr20:1635560	A/G	Gene expression	NCIT_C16608	GTEx	25954001	Unspecified	2015	Testis	-	ENSG00000237914.1	-	-0.466	0.05048	5.667e-17	-	225	1	GTEx-V7_eQTL_EUR_2017
rs6043409	rs6043409	chr20:1616206	chr20:1635560	A/G	Gene expression	NCIT_C16608	Joehanes R	28122634	Mixed	2017	Whole blood	SIRPB1;LOC100653231;LOC100653194	-	3894727	-0.0229	0.00225	3.36e-24	-	5257	1	Joehanes-R_eQTL_EUR_2017
rs6043409	rs6043409	chr20:1616206	chr20:1635560	A/G	Gene expression	NCIT_C16608	Joehanes R	28122634	Mixed	2017	Whole blood	NSFL1C	-	3894637	-0.0154	0.00244	2.835e-10	-	5257	1	Joehanes-R_eQTL_EUR_2017
rs6043409	rs6043409	chr20:1616206	chr20:1635560	A/G	Gene expression	NCIT_C16608	Joehanes R	28122634	Mixed	2017	Whole blood	SIRPG;SIRPA	-	3894765	-0.0227	0.00448	4.281e-07	-	5257	1	Joehanes-R_eQTL_EUR_2017
rs6043409	rs6043409	chr20:1616206	chr20:1635560	A/G	Gene expression	NCIT_C16608	Joehanes R	28122634	Mixed	2017	Whole blood	SIRPD	-	3894699	-0.0156	0.0034	4.699e-06	-	5257	1	Joehanes-R_eQTL_EUR_2017
rs6043409	rs6043409	chr20:1616206	chr20:1635560	A/G	Gene expression	NCIT_C16608	Westra H	24013639	European	2013	Peripheral blood	SIRPG	-	2680050	NA	NA	1.662e-132	NA	5311	1	Westra-H_eQTL_EUR_2013
rs6043409	rs6043409	chr20:1616206	chr20:1635560	A/G	Gene expression	NCIT_C16608	eQTLGen	eQTLGen	European	2018	Whole blood	RP11-77C3.3	ENSG00000237914	-	NA	NA	9.43e-130	+	4656	11	eQTLGen_eQTL_EUR_2018
rs6043409	rs6043409	chr20:1616206	chr20:1635560	A/G	Gene expression	NCIT_C16608	eQTLGen	eQTLGen	European	2018	Whole blood	SIRPG	ENSG00000089012	-	NA	NA	2.94e-104	+	30597	35	eQTLGen_eQTL_EUR_2018
rs6043409	rs6043409	chr20:1616206	chr20:1635560	A/G	Gene expression	NCIT_C16608	eQTLGen	eQTLGen	European	2018	Whole blood	FKBP1A	ENSG00000088832	-	NA	NA	1.18e-13	-	26271	35	eQTLGen_eQTL_EUR_2018
rs6043409	rs6043409	chr20:1616206	chr20:1635560	A/G	Gene expression	NCIT_C16608	eQTLGen	eQTLGen	European	2018	Whole blood	SIRPB2	ENSG00000196209	-	NA	NA	2.46e-10	-	30918	32	eQTLGen_eQTL_EUR_2018
rs6043409	rs6043409	chr20:1616206	chr20:1635560	A/G	Gene expression	NCIT_C16608	eQTLGen	eQTLGen	European	2018	Whole blood	SIRPB1	ENSG00000101307	-	NA	NA	3.39e-09	-	30383	34	eQTLGen_eQTL_EUR_2018
rs6043409	rs6043409	chr20:1616206	chr20:1635560	A/G	Gene expression	NCIT_C16608	eQTLGen	eQTLGen	European	2018	Whole blood	MLH1	ENSG00000076242	-	NA	NA	9.66e-06	-	14263	16	eQTLGen_eQTL_EUR_2018
Table S4B
snp	rsid	hg19_coordinates	hg38_coordinates	a1	a2	trait	efo	study	pmid	ancestry	year	beta	se	p	direction	n	n_cases	n_controls	n_studies	unit	dataset
rs6043409	rs6043409	chr20:1616206	chr20:1635560	A	G	Mean platelet volume	EFO_0004586	Astle W	27863252	European	2016	0.01898	0.003815	6.505e-07	+	173480	0	173480	2	IVNT	Astle-W_Blood-Cell-Traits_EUR_2016
rs6043409	rs6043409	chr20:1616206	chr20:1635560	A	G	Waist hip ratio in females	EFO_0004343	GIANT	23754948	European	2013	0.038	0.0076	5.02e-07	+	42731	0	42731	46	IVNT	GIANT_WHR-F_EUR_2013

## Sheet: Table S5-IL27.EBI3
Table S5: Associations of eQTL rs181209 (cis-pQTL for IL27.EBI3) with IL27.EBI3 expression (A) and with other traites (B) using Phenoscanner
Table S5A
snp	rsid	hg19_coordinates	hg38_coordinates	a1	a2	trait	efo	study	pmid	ancestry	year	tissue	exp_gene	exp_ensembl	probe	beta	se	p	direction	n	n_studies	dataset
rs181209	rs181209	chr16:28514854	chr16:28503533	T	G	Gene expression	NCIT_C16608	BIOSQTL	27918533	European	2017	Whole blood	CCDC101	ENSG00000176476	ENSG00000176476	NA	NA	8.176e-119	-	2116	1	BIOSQTL_eQTL_EUR_2017
rs181209	rs181209	chr16:28514854	chr16:28503533	T	G	Gene expression	NCIT_C16608	BIOSQTL	27918533	European	2017	Whole blood	CDC37P1	ENSG00000259982	ENSG00000259982	NA	NA	5.994e-78	+	2116	1	BIOSQTL_eQTL_EUR_2017
rs181209	rs181209	chr16:28514854	chr16:28503533	T	G	Gene expression	NCIT_C16608	BIOSQTL	27918533	European	2017	Whole blood	CLN3	ENSG00000188603	ENSG00000188603	NA	NA	5.399e-49	-	2116	1	BIOSQTL_eQTL_EUR_2017
rs181209	rs181209	chr16:28514854	chr16:28503533	T	G	Gene expression	NCIT_C16608	BIOSQTL	27918533	European	2017	Whole blood	RP11-435I10.3	ENSG00000261089	ENSG00000261089	NA	NA	4.028e-37	+	2116	1	BIOSQTL_eQTL_EUR_2017
rs181209	rs181209	chr16:28514854	chr16:28503533	T	G	Gene expression	NCIT_C16608	BIOSQTL	27918533	European	2017	Whole blood	A-575C2.4	ENSG00000255524	ENSG00000255524	NA	NA	4.272e-32	+	2116	1	BIOSQTL_eQTL_EUR_2017
rs181209	rs181209	chr16:28514854	chr16:28503533	T	G	Gene expression	NCIT_C16608	BIOSQTL	27918533	European	2017	Whole blood	IL27	ENSG00000197272	ENSG00000197272	NA	NA	5.454e-29	+	2116	1	BIOSQTL_eQTL_EUR_2017
rs181209	rs181209	chr16:28514854	chr16:28503533	T	G	Gene expression	NCIT_C16608	BIOSQTL	27918533	European	2017	Whole blood	EIF3CL	ENSG00000205609	ENSG00000205609	NA	NA	8.512e-25	+	2116	1	BIOSQTL_eQTL_EUR_2017
rs181209	rs181209	chr16:28514854	chr16:28503533	T	G	Gene expression	NCIT_C16608	BIOSQTL	27918533	European	2017	Whole blood	EIF3C	ENSG00000184110	ENSG00000184110	NA	NA	3.984e-24	+	2116	1	BIOSQTL_eQTL_EUR_2017
rs181209	rs181209	chr16:28514854	chr16:28503533	T	G	Gene expression	NCIT_C16608	BIOSQTL	27918533	European	2017	Whole blood	SBK1	ENSG00000188322	ENSG00000188322	NA	NA	1.577e-23	-	2116	1	BIOSQTL_eQTL_EUR_2017
rs181209	rs181209	chr16:28514854	chr16:28503533	T	G	Gene expression	NCIT_C16608	BIOSQTL	27918533	European	2017	Whole blood	CLN3;CLN3	ENSG00000188603;ENSG00000261832	ENSG00000188603;ENSG00000261832	NA	NA	1.116e-18	-	2116	1	BIOSQTL_eQTL_EUR_2017
rs181209	rs181209	chr16:28514854	chr16:28503533	T	G	Gene expression	NCIT_C16608	BIOSQTL	27918533	European	2017	Whole blood	SULT1A1	ENSG00000196502	ENSG00000196502	NA	NA	1.682e-12	-	2116	1	BIOSQTL_eQTL_EUR_2017
rs181209	rs181209	chr16:28514854	chr16:28503533	T	G	Gene expression	NCIT_C16608	BIOSQTL	27918533	European	2017	Whole blood	A-575C2.4	ENSG00000198156	ENSG00000198156	NA	NA	1.454e-09	+	2116	1	BIOSQTL_eQTL_EUR_2017
rs181209	rs181209	chr16:28514854	chr16:28503533	T	G	Gene expression	NCIT_C16608	BIOSQTL	27918533	European	2017	Whole blood	SULT1A2	ENSG00000197165	ENSG00000197165	NA	NA	2.836e-07	+	2116	1	BIOSQTL_eQTL_EUR_2017
rs181209	rs181209	chr16:28514854	chr16:28503533	T	G	Gene expression	NCIT_C16608	BIOSQTL	27918533	European	2017	Whole blood	RP11-57A19.2	ENSG00000246465	ENSG00000246465	NA	NA	5.541e-06	-	2116	1	BIOSQTL_eQTL_EUR_2017
rs181209	rs181209	chr16:28514854	chr16:28503533	T	G	Gene expression	NCIT_C16608	BLUEPRINT	27863251	European	2016	Monocytes	CCDC101	ENSG00000176476.4	-	-0.8208	0.0901	8.392e-20	-	194	1	BLUEPRINT_eQTL_EUR_2016
rs181209	rs181209	chr16:28514854	chr16:28503533	T	G	Gene expression	NCIT_C16608	BLUEPRINT	27863251	European	2016	Monocytes	TUFM	ENSG00000178952.4	-	0.9173	0.0872	7.246e-26	+	194	1	BLUEPRINT_eQTL_EUR_2016
rs181209	rs181209	chr16:28514854	chr16:28503533	T	G	Gene expression	NCIT_C16608	BLUEPRINT	27863251	European	2016	Monocytes	SULT1A2	ENSG00000197165.6	-	0.5188	0.0963	7.229e-08	+	194	1	BLUEPRINT_eQTL_EUR_2016
rs181209	rs181209	chr16:28514854	chr16:28503533	T	G	Gene expression	NCIT_C16608	BLUEPRINT	27863251	European	2016	Monocytes	-	ENSG00000251417.1	-	-0.4827	0.0964	5.45e-07	-	194	1	BLUEPRINT_eQTL_EUR_2016
rs181209	rs181209	chr16:28514854	chr16:28503533	T	G	Gene expression	NCIT_C16608	BLUEPRINT	27863251	European	2016	Neutrophils	ATXN2L	ENSG00000168488.14	-	-0.4959	0.0971	3.253e-07	-	192	1	BLUEPRINT_eQTL_EUR_2016
rs181209	rs181209	chr16:28514854	chr16:28503533	T	G	Gene expression	NCIT_C16608	BLUEPRINT	27863251	European	2016	Neutrophils	CCDC101	ENSG00000176476.4	-	-0.7896	0.0916	6.858e-18	-	192	1	BLUEPRINT_eQTL_EUR_2016
rs181209	rs181209	chr16:28514854	chr16:28503533	T	G	Gene expression	NCIT_C16608	BLUEPRINT	27863251	European	2016	Neutrophils	TUFM	ENSG00000178952.4	-	0.985	0.0856	1.242e-30	+	192	1	BLUEPRINT_eQTL_EUR_2016
rs181209	rs181209	chr16:28514854	chr16:28503533	T	G	Gene expression	NCIT_C16608	BLUEPRINT	27863251	European	2016	Neutrophils	SULT1A2	ENSG00000197165.6	-	0.6749	0.0945	9.034e-13	+	192	1	BLUEPRINT_eQTL_EUR_2016
rs181209	rs181209	chr16:28514854	chr16:28503533	T	G	Gene expression	NCIT_C16608	BLUEPRINT	27863251	European	2016	T cells	CCDC101	ENSG00000176476.4	-	-0.6918	0.0993	3.188e-12	-	169	1	BLUEPRINT_eQTL_EUR_2016
rs181209	rs181209	chr16:28514854	chr16:28503533	T	G	Gene expression	NCIT_C16608	BLUEPRINT	27863251	European	2016	T cells	TUFM	ENSG00000178952.4	-	0.9392	0.0917	1.232e-24	+	169	1	BLUEPRINT_eQTL_EUR_2016
rs181209	rs181209	chr16:28514854	chr16:28503533	T	G	Gene expression	NCIT_C16608	BLUEPRINT	27863251	European	2016	T cells	SULT1A1	ENSG00000196502.7	-	-0.4586	0.1034	9.218e-06	-	169	1	BLUEPRINT_eQTL_EUR_2016
rs181209	rs181209	chr16:28514854	chr16:28503533	T	G	Gene expression	NCIT_C16608	BLUEPRINT	27863251	European	2016	T cells	SULT1A2	ENSG00000197165.6	-	0.8404	0.0954	1.303e-18	+	169	1	BLUEPRINT_eQTL_EUR_2016
rs181209	rs181209	chr16:28514854	chr16:28503533	T	G	Gene expression	NCIT_C16608	GTEx	25954001	Unspecified	2015	Adipose subcutaneous	SH2B1	ENSG00000178188.10	-	-0.1636	0.03302	1.322e-06	-	298	1	GTEx-V6p_eQTL_EUR_2016
rs181209	rs181209	chr16:28514854	chr16:28503533	T	G	Gene expression	NCIT_C16608	GTEx	25954001	Unspecified	2015	Adipose subcutaneous	TUFM	ENSG00000178952.4	-	0.2624	0.05442	2.445e-06	+	298	1	GTEx-V6p_eQTL_EUR_2016
rs181209	rs181209	chr16:28514854	chr16:28503533	T	G	Gene expression	NCIT_C16608	GTEx	25954001	Unspecified	2015	Adipose subcutaneous	SULT1A2	ENSG00000197165.6	-	0.5794	0.06632	3.208e-16	+	298	1	GTEx-V6p_eQTL_EUR_2016
rs181209	rs181209	chr16:28514854	chr16:28503533	T	G	Gene expression	NCIT_C16608	GTEx	25954001	Unspecified	2015	Adipose subcutaneous	EIF3CL	ENSG00000205609.8	-	0.3488	0.07075	1.477e-06	+	298	1	GTEx-V6p_eQTL_EUR_2016
rs181209	rs181209	chr16:28514854	chr16:28503533	T	G	Gene expression	NCIT_C16608	GTEx	25954001	Unspecified	2015	Adipose subcutaneous	-	ENSG00000251417.1	-	-0.4198	0.08018	3.44e-07	-	298	1	GTEx-V6p_eQTL_EUR_2016
rs181209	rs181209	chr16:28514854	chr16:28503533	T	G	Gene expression	NCIT_C16608	GTEx	25954001	Unspecified	2015	Adipose subcutaneous	CDC37P1	ENSG00000259982.1	-	0.6616	0.08555	2.397e-13	+	298	1	GTEx-V6p_eQTL_EUR_2016
rs181209	rs181209	chr16:28514854	chr16:28503533	T	G	Gene expression	NCIT_C16608	GTEx	25954001	Unspecified	2015	Adipose subcutaneous	-	ENSG00000270424.1	-	0.4847	0.08823	9.518e-08	+	298	1	GTEx-V6p_eQTL_EUR_2016
rs181209	rs181209	chr16:28514854	chr16:28503533	T	G	Gene expression	NCIT_C16608	GTEx	25954001	Unspecified	2015	Adipose visceral omentum	SH2B1	ENSG00000178188.10	-	-0.1551	0.03229	3.784e-06	-	185	1	GTEx-V6p_eQTL_EUR_2016
rs181209	rs181209	chr16:28514854	chr16:28503533	T	G	Gene expression	NCIT_C16608	GTEx	25954001	Unspecified	2015	Adipose visceral omentum	SULT1A2	ENSG00000197165.6	-	0.5892	0.08116	2.033e-11	+	185	1	GTEx-V6p_eQTL_EUR_2016
rs181209	rs181209	chr16:28514854	chr16:28503533	T	G	Gene expression	NCIT_C16608	GTEx	25954001	Unspecified	2015	Adipose visceral omentum	NPIPB7	ENSG00000233232.2	-	-0.5143	0.1041	2.093e-06	-	185	1	GTEx-V6p_eQTL_EUR_2016
rs181209	rs181209	chr16:28514854	chr16:28503533	T	G	Gene expression	NCIT_C16608	GTEx	25954001	Unspecified	2015	Adipose visceral omentum	-	ENSG00000251417.1	-	-0.4937	0.09641	9.328e-07	-	185	1	GTEx-V6p_eQTL_EUR_2016
rs181209	rs181209	chr16:28514854	chr16:28503533	T	G	Gene expression	NCIT_C16608	GTEx	25954001	Unspecified	2015	Adrenal gland	SULT1A2	ENSG00000197165.6	-	0.8767	0.116	1.688e-11	+	126	1	GTEx-V6p_eQTL_EUR_2016
rs181209	rs181209	chr16:28514854	chr16:28503533	T	G	Gene expression	NCIT_C16608	GTEx	25954001	Unspecified	2015	Artery aorta	TUFM	ENSG00000178952.4	-	0.374	0.05941	2.829e-09	+	197	1	GTEx-V6p_eQTL_EUR_2016
rs181209	rs181209	chr16:28514854	chr16:28503533	T	G	Gene expression	NCIT_C16608	GTEx	25954001	Unspecified	2015	Artery aorta	SULT1A2	ENSG00000197165.6	-	0.4519	0.09282	2.675e-06	+	197	1	GTEx-V6p_eQTL_EUR_2016
rs181209	rs181209	chr16:28514854	chr16:28503533	T	G	Gene expression	NCIT_C16608	GTEx	25954001	Unspecified	2015	Artery aorta	EIF3CL	ENSG00000205609.8	-	0.5848	0.09394	4.055e-09	+	197	1	GTEx-V6p_eQTL_EUR_2016
rs181209	rs181209	chr16:28514854	chr16:28503533	T	G	Gene expression	NCIT_C16608	GTEx	25954001	Unspecified	2015	Artery aorta	CDC37P1	ENSG00000259982.1	-	0.6523	0.102	1.661e-09	+	197	1	GTEx-V6p_eQTL_EUR_2016
rs181209	rs181209	chr16:28514854	chr16:28503533	T	G	Gene expression	NCIT_C16608	GTEx	25954001	Unspecified	2015	Artery coronary	CDC37P1	ENSG00000259982.1	-	0.803	0.1317	2.236e-08	+	118	1	GTEx-V6p_eQTL_EUR_2016
rs181209	rs181209	chr16:28514854	chr16:28503533	T	G	Gene expression	NCIT_C16608	GTEx	25954001	Unspecified	2015	Artery tibial	NUPR1	ENSG00000176046.7	-	-0.3654	0.05195	2.044e-11	-	285	1	GTEx-V6p_eQTL_EUR_2016
rs181209	rs181209	chr16:28514854	chr16:28503533	T	G	Gene expression	NCIT_C16608	GTEx	25954001	Unspecified	2015	Artery tibial	NFATC2IP	ENSG00000176953.6	-	0.2015	0.04189	2.637e-06	+	285	1	GTEx-V6p_eQTL_EUR_2016
rs181209	rs181209	chr16:28514854	chr16:28503533	T	G	Gene expression	NCIT_C16608	GTEx	25954001	Unspecified	2015	Artery tibial	TUFM	ENSG00000178952.4	-	0.3779	0.04566	8.552e-15	+	285	1	GTEx-V6p_eQTL_EUR_2016
rs181209	rs181209	chr16:28514854	chr16:28503533	T	G	Gene expression	NCIT_C16608	GTEx	25954001	Unspecified	2015	Artery tibial	SULT1A1	ENSG00000196502.7	-	-0.2942	0.05389	1.173e-07	-	285	1	GTEx-V6p_eQTL_EUR_2016
rs181209	rs181209	chr16:28514854	chr16:28503533	T	G	Gene expression	NCIT_C16608	GTEx	25954001	Unspecified	2015	Artery tibial	SULT1A2	ENSG00000197165.6	-	0.5616	0.07996	2.153e-11	+	285	1	GTEx-V6p_eQTL_EUR_2016
rs181209	rs181209	chr16:28514854	chr16:28503533	T	G	Gene expression	NCIT_C16608	GTEx	25954001	Unspecified	2015	Artery tibial	-	ENSG00000251417.1	-	-0.5498	0.07788	1.742e-11	-	285	1	GTEx-V6p_eQTL_EUR_2016
rs181209	rs181209	chr16:28514854	chr16:28503533	T	G	Gene expression	NCIT_C16608	GTEx	25954001	Unspecified	2015	Artery tibial	CDC37P1	ENSG00000259982.1	-	0.655	0.0762	1.028e-15	+	285	1	GTEx-V6p_eQTL_EUR_2016
rs181209	rs181209	chr16:28514854	chr16:28503533	T	G	Gene expression	NCIT_C16608	GTEx	25954001	Unspecified	2015	Artery tibial	-	ENSG00000271623.1	-	-0.4006	0.08423	3.395e-06	-	285	1	GTEx-V6p_eQTL_EUR_2016
rs181209	rs181209	chr16:28514854	chr16:28503533	T	G	Gene expression	NCIT_C16608	GTEx	25954001	Unspecified	2015	Brain cerebellum	APOBR	ENSG00000184730.6	-	0.619	0.1292	7.438e-06	+	103	1	GTEx-V6p_eQTL_EUR_2016
rs181209	rs181209	chr16:28514854	chr16:28503533	T	G	Gene expression	NCIT_C16608	GTEx	25954001	Unspecified	2015	Brain cerebellum	SULT1A1	ENSG00000196502.7	-	-0.5575	0.1094	2.207e-06	-	103	1	GTEx-V6p_eQTL_EUR_2016
rs181209	rs181209	chr16:28514854	chr16:28503533	T	G	Gene expression	NCIT_C16608	GTEx	25954001	Unspecified	2015	Brain cortex	SULT1A2	ENSG00000197165.6	-	0.6741	0.1393	6.942e-06	+	96	1	GTEx-V6p_eQTL_EUR_2016
rs181209	rs181209	chr16:28514854	chr16:28503533	T	G	Gene expression	NCIT_C16608	GTEx	25954001	Unspecified	2015	Brain frontal cortex ba9	SULT1A1	ENSG00000196502.7	-	-0.6406	0.1261	2.988e-06	-	92	1	GTEx-V6p_eQTL_EUR_2016
rs181209	rs181209	chr16:28514854	chr16:28503533	T	G	Gene expression	NCIT_C16608	GTEx	25954001	Unspecified	2015	Brain frontal cortex ba9	NPIPB7	ENSG00000233232.2	-	-0.6606	0.1263	1.669e-06	-	92	1	GTEx-V6p_eQTL_EUR_2016
rs181209	rs181209	chr16:28514854	chr16:28503533	T	G	Gene expression	NCIT_C16608	GTEx	25954001	Unspecified	2015	Brain putamen basal ganglia	TUFM	ENSG00000178952.4	-	0.4101	0.07605	1.236e-06	+	82	1	GTEx-V6p_eQTL_EUR_2016
rs181209	rs181209	chr16:28514854	chr16:28503533	T	G	Gene expression	NCIT_C16608	GTEx	25954001	Unspecified	2015	Breast mammary tissue	SULT1A2	ENSG00000197165.6	-	0.4415	0.08928	2.064e-06	+	183	1	GTEx-V6p_eQTL_EUR_2016
rs181209	rs181209	chr16:28514854	chr16:28503533	T	G	Gene expression	NCIT_C16608	GTEx	25954001	Unspecified	2015	Breast mammary tissue	-	ENSG00000251417.1	-	-0.4985	0.09356	3.688e-07	-	183	1	GTEx-V6p_eQTL_EUR_2016
rs181209	rs181209	chr16:28514854	chr16:28503533	T	G	Gene expression	NCIT_C16608	GTEx	25954001	Unspecified	2015	Breast mammary tissue	CDC37P1	ENSG00000259982.1	-	0.5949	0.1136	5.595e-07	+	183	1	GTEx-V6p_eQTL_EUR_2016
rs181209	rs181209	chr16:28514854	chr16:28503533	T	G	Gene expression	NCIT_C16608	GTEx	25954001	Unspecified	2015	Cells EBV-transformed lymphocytes	CDC37P1	ENSG00000259982.1	-	0.6938	0.1351	1.574e-06	+	114	1	GTEx-V6p_eQTL_EUR_2016
rs181209	rs181209	chr16:28514854	chr16:28503533	T	G	Gene expression	NCIT_C16608	GTEx	25954001	Unspecified	2015	Cells transformed fibroblasts	CDC37P1	ENSG00000259982.1	-	0.4259	0.07818	1.311e-07	+	272	1	GTEx-V6p_eQTL_EUR_2016
rs181209	rs181209	chr16:28514854	chr16:28503533	T	G	Gene expression	NCIT_C16608	GTEx	25954001	Unspecified	2015	Colon transverse	TUFM	ENSG00000178952.4	-	0.1781	0.03328	3.763e-07	+	169	1	GTEx-V6p_eQTL_EUR_2016
rs181209	rs181209	chr16:28514854	chr16:28503533	T	G	Gene expression	NCIT_C16608	GTEx	25954001	Unspecified	2015	Colon transverse	CDC37P1	ENSG00000259982.1	-	0.7407	0.1065	1.455e-10	+	169	1	GTEx-V6p_eQTL_EUR_2016
rs181209	rs181209	chr16:28514854	chr16:28503533	T	G	Gene expression	NCIT_C16608	GTEx	25954001	Unspecified	2015	Esophagus mucosa	SULT1A1	ENSG00000196502.7	-	-0.4663	0.07649	5.345e-09	-	241	1	GTEx-V6p_eQTL_EUR_2016
rs181209	rs181209	chr16:28514854	chr16:28503533	T	G	Gene expression	NCIT_C16608	GTEx	25954001	Unspecified	2015	Esophagus mucosa	SULT1A2	ENSG00000197165.6	-	0.639	0.09025	2.273e-11	+	241	1	GTEx-V6p_eQTL_EUR_2016
rs181209	rs181209	chr16:28514854	chr16:28503533	T	G	Gene expression	NCIT_C16608	GTEx	25954001	Unspecified	2015	Esophagus mucosa	EIF3CL	ENSG00000205609.8	-	0.3776	0.07761	2.291e-06	+	241	1	GTEx-V6p_eQTL_EUR_2016
rs181209	rs181209	chr16:28514854	chr16:28503533	T	G	Gene expression	NCIT_C16608	GTEx	25954001	Unspecified	2015	Esophagus mucosa	CDC37P1	ENSG00000259982.1	-	0.6833	0.09308	4.958e-12	+	241	1	GTEx-V6p_eQTL_EUR_2016
rs181209	rs181209	chr16:28514854	chr16:28503533	T	G	Gene expression	NCIT_C16608	GTEx	25954001	Unspecified	2015	Esophagus muscularis	TUFM	ENSG00000178952.4	-	0.3639	0.0667	1.588e-07	+	218	1	GTEx-V6p_eQTL_EUR_2016
rs181209	rs181209	chr16:28514854	chr16:28503533	T	G	Gene expression	NCIT_C16608	GTEx	25954001	Unspecified	2015	Esophagus muscularis	EIF3C	ENSG00000184110.10	-	0.3735	0.07395	1.065e-06	+	218	1	GTEx-V6p_eQTL_EUR_2016
rs181209	rs181209	chr16:28514854	chr16:28503533	T	G	Gene expression	NCIT_C16608	GTEx	25954001	Unspecified	2015	Esophagus muscularis	SULT1A2	ENSG00000197165.6	-	0.6933	0.08632	1.189e-13	+	218	1	GTEx-V6p_eQTL_EUR_2016
rs181209	rs181209	chr16:28514854	chr16:28503533	T	G	Gene expression	NCIT_C16608	GTEx	25954001	Unspecified	2015	Esophagus muscularis	EIF3CL	ENSG00000205609.8	-	0.4237	0.08868	3.654e-06	+	218	1	GTEx-V6p_eQTL_EUR_2016
rs181209	rs181209	chr16:28514854	chr16:28503533	T	G	Gene expression	NCIT_C16608	GTEx	25954001	Unspecified	2015	Esophagus muscularis	-	ENSG00000271623.1	-	-0.6391	0.1039	4.836e-09	-	218	1	GTEx-V6p_eQTL_EUR_2016
rs181209	rs181209	chr16:28514854	chr16:28503533	T	G	Gene expression	NCIT_C16608	GTEx	25954001	Unspecified	2015	Heart atrial appendage	SULT1A2	ENSG00000197165.6	-	0.5545	0.07956	1.751e-10	+	159	1	GTEx-V6p_eQTL_EUR_2016
rs181209	rs181209	chr16:28514854	chr16:28503533	T	G	Gene expression	NCIT_C16608	GTEx	25954001	Unspecified	2015	Heart atrial appendage	CDC37P1	ENSG00000259982.1	-	0.5749	0.1227	7.273e-06	+	159	1	GTEx-V6p_eQTL_EUR_2016
rs181209	rs181209	chr16:28514854	chr16:28503533	T	G	Gene expression	NCIT_C16608	GTEx	25954001	Unspecified	2015	Heart left ventricle	SULT1A2	ENSG00000197165.6	-	0.7406	0.07978	1.52e-16	+	190	1	GTEx-V6p_eQTL_EUR_2016
rs181209	rs181209	chr16:28514854	chr16:28503533	T	G	Gene expression	NCIT_C16608	GTEx	25954001	Unspecified	2015	Heart left ventricle	EIF3CL	ENSG00000205609.8	-	0.4457	0.09213	3.178e-06	+	190	1	GTEx-V6p_eQTL_EUR_2016
rs181209	rs181209	chr16:28514854	chr16:28503533	T	G	Gene expression	NCIT_C16608	GTEx	25954001	Unspecified	2015	Liver	IL27	ENSG00000197272.2	-	0.4408	0.06914	1.338e-08	+	97	1	GTEx-V6p_eQTL_EUR_2016
rs181209	rs181209	chr16:28514854	chr16:28503533	T	G	Gene expression	NCIT_C16608	GTEx	25954001	Unspecified	2015	Lung	TUFM	ENSG00000178952.4	-	0.1635	0.0337	2.244e-06	+	278	1	GTEx-V6p_eQTL_EUR_2016
rs181209	rs181209	chr16:28514854	chr16:28503533	T	G	Gene expression	NCIT_C16608	GTEx	25954001	Unspecified	2015	Lung	SULT1A1	ENSG00000196502.7	-	-0.3265	0.06263	4.047e-07	-	278	1	GTEx-V6p_eQTL_EUR_2016
rs181209	rs181209	chr16:28514854	chr16:28503533	T	G	Gene expression	NCIT_C16608	GTEx	25954001	Unspecified	2015	Lung	EIF3CL	ENSG00000205609.8	-	0.319	0.06382	1.126e-06	+	278	1	GTEx-V6p_eQTL_EUR_2016
rs181209	rs181209	chr16:28514854	chr16:28503533	T	G	Gene expression	NCIT_C16608	GTEx	25954001	Unspecified	2015	Lung	-	ENSG00000251417.1	-	-0.4747	0.08014	1.106e-08	-	278	1	GTEx-V6p_eQTL_EUR_2016
rs181209	rs181209	chr16:28514854	chr16:28503533	T	G	Gene expression	NCIT_C16608	GTEx	25954001	Unspecified	2015	Lung	CDC37P1	ENSG00000259982.1	-	0.6241	0.08473	2.934e-12	+	278	1	GTEx-V6p_eQTL_EUR_2016
rs181209	rs181209	chr16:28514854	chr16:28503533	T	G	Gene expression	NCIT_C16608	GTEx	25954001	Unspecified	2015	Muscle skeletal	SULT1A1	ENSG00000196502.7	-	-0.2661	0.05368	1.167e-06	-	361	1	GTEx-V6p_eQTL_EUR_2016
rs181209	rs181209	chr16:28514854	chr16:28503533	T	G	Gene expression	NCIT_C16608	GTEx	25954001	Unspecified	2015	Muscle skeletal	SULT1A2	ENSG00000197165.6	-	0.7358	0.07033	3.211e-22	+	361	1	GTEx-V6p_eQTL_EUR_2016
rs181209	rs181209	chr16:28514854	chr16:28503533	T	G	Gene expression	NCIT_C16608	GTEx	25954001	Unspecified	2015	Muscle skeletal	LAT	ENSG00000213658.6	-	0.2719	0.06007	8.506e-06	+	361	1	GTEx-V6p_eQTL_EUR_2016
rs181209	rs181209	chr16:28514854	chr16:28503533	T	G	Gene expression	NCIT_C16608	GTEx	25954001	Unspecified	2015	Muscle skeletal	-	ENSG00000260442.1	-	-0.2513	0.05572	9.082e-06	-	361	1	GTEx-V6p_eQTL_EUR_2016
rs181209	rs181209	chr16:28514854	chr16:28503533	T	G	Gene expression	NCIT_C16608	GTEx	25954001	Unspecified	2015	Nerve tibial	SH2B1	ENSG00000178188.10	-	-0.1382	0.02896	3.37e-06	-	256	1	GTEx-V6p_eQTL_EUR_2016
rs181209	rs181209	chr16:28514854	chr16:28503533	T	G	Gene expression	NCIT_C16608	GTEx	25954001	Unspecified	2015	Nerve tibial	TUFM	ENSG00000178952.4	-	0.2715	0.04605	1.443e-08	+	256	1	GTEx-V6p_eQTL_EUR_2016
rs181209	rs181209	chr16:28514854	chr16:28503533	T	G	Gene expression	NCIT_C16608	GTEx	25954001	Unspecified	2015	Nerve tibial	SULT1A1	ENSG00000196502.7	-	-0.4562	0.07286	2.065e-09	-	256	1	GTEx-V6p_eQTL_EUR_2016
rs181209	rs181209	chr16:28514854	chr16:28503533	T	G	Gene expression	NCIT_C16608	GTEx	25954001	Unspecified	2015	Nerve tibial	SULT1A2	ENSG00000197165.6	-	0.5575	0.06289	3.039e-16	+	256	1	GTEx-V6p_eQTL_EUR_2016
rs181209	rs181209	chr16:28514854	chr16:28503533	T	G	Gene expression	NCIT_C16608	GTEx	25954001	Unspecified	2015	Nerve tibial	-	ENSG00000251417.1	-	-0.5149	0.08862	2.239e-08	-	256	1	GTEx-V6p_eQTL_EUR_2016
rs181209	rs181209	chr16:28514854	chr16:28503533	T	G	Gene expression	NCIT_C16608	GTEx	25954001	Unspecified	2015	Nerve tibial	CDC37P1	ENSG00000259982.1	-	0.5924	0.09383	1.547e-09	+	256	1	GTEx-V6p_eQTL_EUR_2016
rs181209	rs181209	chr16:28514854	chr16:28503533	T	G	Gene expression	NCIT_C16608	GTEx	25954001	Unspecified	2015	Nerve tibial	-	ENSG00000271623.1	-	-0.7252	0.08817	1.883e-14	-	256	1	GTEx-V6p_eQTL_EUR_2016
rs181209	rs181209	chr16:28514854	chr16:28503533	T	G	Gene expression	NCIT_C16608	GTEx	25954001	Unspecified	2015	Ovary	-	ENSG00000271623.1	-	-0.8078	0.1614	4.617e-06	-	85	1	GTEx-V6p_eQTL_EUR_2016
rs181209	rs181209	chr16:28514854	chr16:28503533	T	G	Gene expression	NCIT_C16608	GTEx	25954001	Unspecified	2015	Pancreas	TUFM	ENSG00000178952.4	-	0.5014	0.09289	3.82e-07	+	149	1	GTEx-V6p_eQTL_EUR_2016
rs181209	rs181209	chr16:28514854	chr16:28503533	T	G	Gene expression	NCIT_C16608	GTEx	25954001	Unspecified	2015	Pancreas	EIF3CL	ENSG00000205609.8	-	0.5247	0.103	1.442e-06	+	149	1	GTEx-V6p_eQTL_EUR_2016
rs181209	rs181209	chr16:28514854	chr16:28503533	T	G	Gene expression	NCIT_C16608	GTEx	25954001	Unspecified	2015	Pancreas	CDC37P1	ENSG00000259982.1	-	0.669	0.1256	5.184e-07	+	149	1	GTEx-V6p_eQTL_EUR_2016
rs181209	rs181209	chr16:28514854	chr16:28503533	T	G	Gene expression	NCIT_C16608	GTEx	25954001	Unspecified	2015	Pituitary	SULT1A1	ENSG00000196502.7	-	-0.5281	0.1046	3.849e-06	-	87	1	GTEx-V6p_eQTL_EUR_2016
rs181209	rs181209	chr16:28514854	chr16:28503533	T	G	Gene expression	NCIT_C16608	GTEx	25954001	Unspecified	2015	Prostate	SULT1A2	ENSG00000197165.6	-	0.8909	0.1291	2.412e-09	+	87	1	GTEx-V6p_eQTL_EUR_2016
rs181209	rs181209	chr16:28514854	chr16:28503533	T	G	Gene expression	NCIT_C16608	GTEx	25954001	Unspecified	2015	Skin not sun exposed suprapubic	TUFM	ENSG00000178952.4	-	0.3641	0.05261	1.046e-10	+	196	1	GTEx-V6p_eQTL_EUR_2016
rs181209	rs181209	chr16:28514854	chr16:28503533	T	G	Gene expression	NCIT_C16608	GTEx	25954001	Unspecified	2015	Skin not sun exposed suprapubic	SULT1A1	ENSG00000196502.7	-	-0.3756	0.06707	9.233e-08	-	196	1	GTEx-V6p_eQTL_EUR_2016
rs181209	rs181209	chr16:28514854	chr16:28503533	T	G	Gene expression	NCIT_C16608	GTEx	25954001	Unspecified	2015	Skin not sun exposed suprapubic	-	ENSG00000271623.1	-	-0.6752	0.09585	5.328e-11	-	196	1	GTEx-V6p_eQTL_EUR_2016
rs181209	rs181209	chr16:28514854	chr16:28503533	T	G	Gene expression	NCIT_C16608	GTEx	25954001	Unspecified	2015	Skin sun exposed lower leg	TUFM	ENSG00000178952.4	-	0.3842	0.04815	4.707e-14	+	302	1	GTEx-V6p_eQTL_EUR_2016
rs181209	rs181209	chr16:28514854	chr16:28503533	T	G	Gene expression	NCIT_C16608	GTEx	25954001	Unspecified	2015	Skin sun exposed lower leg	EIF3C	ENSG00000184110.10	-	0.3204	0.06532	1.646e-06	+	302	1	GTEx-V6p_eQTL_EUR_2016
rs181209	rs181209	chr16:28514854	chr16:28503533	T	G	Gene expression	NCIT_C16608	GTEx	25954001	Unspecified	2015	Skin sun exposed lower leg	SULT1A1	ENSG00000196502.7	-	-0.3407	0.06008	3.771e-08	-	302	1	GTEx-V6p_eQTL_EUR_2016
rs181209	rs181209	chr16:28514854	chr16:28503533	T	G	Gene expression	NCIT_C16608	GTEx	25954001	Unspecified	2015	Skin sun exposed lower leg	SULT1A2	ENSG00000197165.6	-	0.3848	0.08216	4.546e-06	+	302	1	GTEx-V6p_eQTL_EUR_2016
rs181209	rs181209	chr16:28514854	chr16:28503533	T	G	Gene expression	NCIT_C16608	GTEx	25954001	Unspecified	2015	Skin sun exposed lower leg	NPIPB6	ENSG00000198156.6	-	0.4474	0.06031	1.689e-12	+	302	1	GTEx-V6p_eQTL_EUR_2016
rs181209	rs181209	chr16:28514854	chr16:28503533	T	G	Gene expression	NCIT_C16608	GTEx	25954001	Unspecified	2015	Skin sun exposed lower leg	EIF3CL	ENSG00000205609.8	-	0.336	0.05528	4.331e-09	+	302	1	GTEx-V6p_eQTL_EUR_2016
rs181209	rs181209	chr16:28514854	chr16:28503533	T	G	Gene expression	NCIT_C16608	GTEx	25954001	Unspecified	2015	Skin sun exposed lower leg	NPIPB7	ENSG00000233232.2	-	-0.4869	0.07151	6.76e-11	-	302	1	GTEx-V6p_eQTL_EUR_2016
rs181209	rs181209	chr16:28514854	chr16:28503533	T	G	Gene expression	NCIT_C16608	GTEx	25954001	Unspecified	2015	Skin sun exposed lower leg	-	ENSG00000251417.1	-	-0.5513	0.08605	6.961e-10	-	302	1	GTEx-V6p_eQTL_EUR_2016
rs181209	rs181209	chr16:28514854	chr16:28503533	T	G	Gene expression	NCIT_C16608	GTEx	25954001	Unspecified	2015	Skin sun exposed lower leg	CDC37P1	ENSG00000259982.1	-	0.4314	0.08656	1.137e-06	+	302	1	GTEx-V6p_eQTL_EUR_2016
rs181209	rs181209	chr16:28514854	chr16:28503533	T	G	Gene expression	NCIT_C16608	GTEx	25954001	Unspecified	2015	Skin sun exposed lower leg	-	ENSG00000270424.1	-	0.4033	0.08656	5.081e-06	+	302	1	GTEx-V6p_eQTL_EUR_2016
rs181209	rs181209	chr16:28514854	chr16:28503533	T	G	Gene expression	NCIT_C16608	GTEx	25954001	Unspecified	2015	Skin sun exposed lower leg	-	ENSG00000271623.1	-	-0.4142	0.08491	1.865e-06	-	302	1	GTEx-V6p_eQTL_EUR_2016
rs181209	rs181209	chr16:28514854	chr16:28503533	T	G	Gene expression	NCIT_C16608	GTEx	25954001	Unspecified	2015	Spleen	SULT1A2	ENSG00000197165.6	-	0.5205	0.09766	1.244e-06	+	89	1	GTEx-V6p_eQTL_EUR_2016
rs181209	rs181209	chr16:28514854	chr16:28503533	T	G	Gene expression	NCIT_C16608	GTEx	25954001	Unspecified	2015	Stomach	EIF3CL	ENSG00000205609.8	-	0.4495	0.09106	2.344e-06	+	170	1	GTEx-V6p_eQTL_EUR_2016
rs181209	rs181209	chr16:28514854	chr16:28503533	T	G	Gene expression	NCIT_C16608	GTEx	25954001	Unspecified	2015	Stomach	CDC37P1	ENSG00000259982.1	-	0.5915	0.1071	1.699e-07	+	170	1	GTEx-V6p_eQTL_EUR_2016
rs181209	rs181209	chr16:28514854	chr16:28503533	T	G	Gene expression	NCIT_C16608	GTEx	25954001	Unspecified	2015	Testis	SULT1A2	ENSG00000197165.6	-	0.7948	0.1161	3.338e-10	+	157	1	GTEx-V6p_eQTL_EUR_2016
rs181209	rs181209	chr16:28514854	chr16:28503533	T	G	Gene expression	NCIT_C16608	GTEx	25954001	Unspecified	2015	Testis	IL27	ENSG00000197272.2	-	0.6911	0.1208	7.895e-08	+	157	1	GTEx-V6p_eQTL_EUR_2016
rs181209	rs181209	chr16:28514854	chr16:28503533	T	G	Gene expression	NCIT_C16608	GTEx	25954001	Unspecified	2015	Testis	NPIPB6	ENSG00000198156.6	-	-0.6676	0.08392	1.079e-12	-	157	1	GTEx-V6p_eQTL_EUR_2016
rs181209	rs181209	chr16:28514854	chr16:28503533	T	G	Gene expression	NCIT_C16608	GTEx	25954001	Unspecified	2015	Testis	-	ENSG00000271623.1	-	-0.8168	0.1	3.536e-13	-	157	1	GTEx-V6p_eQTL_EUR_2016
rs181209	rs181209	chr16:28514854	chr16:28503533	T	G	Gene expression	NCIT_C16608	GTEx	25954001	Unspecified	2015	Thyroid	TUFM	ENSG00000178952.4	-	0.2892	0.04829	7.806e-09	+	278	1	GTEx-V6p_eQTL_EUR_2016
rs181209	rs181209	chr16:28514854	chr16:28503533	T	G	Gene expression	NCIT_C16608	GTEx	25954001	Unspecified	2015	Thyroid	SULT1A1	ENSG00000196502.7	-	-0.5667	0.07016	3.418e-14	-	278	1	GTEx-V6p_eQTL_EUR_2016
rs181209	rs181209	chr16:28514854	chr16:28503533	T	G	Gene expression	NCIT_C16608	GTEx	25954001	Unspecified	2015	Thyroid	CDC37P1	ENSG00000259982.1	-	0.6871	0.08407	1.846e-14	+	278	1	GTEx-V6p_eQTL_EUR_2016
rs181209	rs181209	chr16:28514854	chr16:28503533	T	G	Gene expression	NCIT_C16608	GTEx	25954001	Unspecified	2015	Thyroid	-	ENSG00000270424.1	-	0.6115	0.09254	2.564e-10	+	278	1	GTEx-V6p_eQTL_EUR_2016
rs181209	rs181209	chr16:28514854	chr16:28503533	T	G	Gene expression	NCIT_C16608	GTEx	25954001	Unspecified	2015	Thyroid	-	ENSG00000271623.1	-	-0.5409	0.09207	1.427e-08	-	278	1	GTEx-V6p_eQTL_EUR_2016
rs181209	rs181209	chr16:28514854	chr16:28503533	T	G	Gene expression	NCIT_C16608	GTEx	25954001	Unspecified	2015	Uterus	SULT1A2	ENSG00000197165.6	-	0.922	0.1504	1.469e-07	+	70	1	GTEx-V6p_eQTL_EUR_2016
rs181209	rs181209	chr16:28514854	chr16:28503533	T	G	Gene expression	NCIT_C16608	GTEx	25954001	Unspecified	2015	Whole blood	SPNS1	ENSG00000169682.13	-	0.1618	0.02872	4.079e-08	+	338	1	GTEx-V6p_eQTL_EUR_2016
rs181209	rs181209	chr16:28514854	chr16:28503533	T	G	Gene expression	NCIT_C16608	GTEx	25954001	Unspecified	2015	Whole blood	TUFM	ENSG00000178952.4	-	0.4626	0.03927	1.589e-26	+	338	1	GTEx-V6p_eQTL_EUR_2016
rs181209	rs181209	chr16:28514854	chr16:28503533	T	G	Gene expression	NCIT_C16608	GTEx	25954001	Unspecified	2015	Whole blood	EIF3C	ENSG00000184110.10	-	0.1952	0.04278	7.382e-06	+	338	1	GTEx-V6p_eQTL_EUR_2016
rs181209	rs181209	chr16:28514854	chr16:28503533	T	G	Gene expression	NCIT_C16608	GTEx	25954001	Unspecified	2015	Whole blood	SULT1A1	ENSG00000196502.7	-	-0.3398	0.05479	1.871e-09	-	338	1	GTEx-V6p_eQTL_EUR_2016
rs181209	rs181209	chr16:28514854	chr16:28503533	T	G	Gene expression	NCIT_C16608	GTEx	25954001	Unspecified	2015	Whole blood	SULT1A2	ENSG00000197165.6	-	0.735	0.05692	1.464e-30	+	338	1	GTEx-V6p_eQTL_EUR_2016
rs181209	rs181209	chr16:28514854	chr16:28503533	T	G	Gene expression	NCIT_C16608	GTEx	25954001	Unspecified	2015	Whole blood	NPIPB7	ENSG00000233232.2	-	-0.3209	0.06462	1.162e-06	-	338	1	GTEx-V6p_eQTL_EUR_2016
rs181209	rs181209	chr16:28514854	chr16:28503533	T	G	Gene expression	NCIT_C16608	GTEx	25954001	Unspecified	2015	Whole blood	CDC37P1	ENSG00000259982.1	-	0.5354	0.07544	9.437e-12	+	338	1	GTEx-V6p_eQTL_EUR_2016
rs181209	rs181209	chr16:28514854	chr16:28503533	T	G	Gene expression	NCIT_C16608	GTEx	25954001	Unspecified	2015	Adipose subcutaneous	NPIPB7	ENSG00000233232.2	-	-0.4193	0.07765	1.307e-07	-	385	1	GTEx-V7_eQTL_EUR_2017
rs181209	rs181209	chr16:28514854	chr16:28503533	T	G	Gene expression	NCIT_C16608	GTEx	25954001	Unspecified	2015	Adipose subcutaneous	SULT1A2	ENSG00000197165.6	-	0.6184	0.05218	4.38e-27	+	385	1	GTEx-V7_eQTL_EUR_2017
rs181209	rs181209	chr16:28514854	chr16:28503533	T	G	Gene expression	NCIT_C16608	GTEx	25954001	Unspecified	2015	Adipose subcutaneous	EIF3C	ENSG00000184110.10	-	0.3424	0.0625	8.706e-08	+	385	1	GTEx-V7_eQTL_EUR_2017
rs181209	rs181209	chr16:28514854	chr16:28503533	T	G	Gene expression	NCIT_C16608	GTEx	25954001	Unspecified	2015	Adipose subcutaneous	CDC37P1	ENSG00000259982.1	-	0.5799	0.07193	1.538e-14	+	385	1	GTEx-V7_eQTL_EUR_2017
rs181209	rs181209	chr16:28514854	chr16:28503533	T	G	Gene expression	NCIT_C16608	GTEx	25954001	Unspecified	2015	Adipose subcutaneous	-	ENSG00000251417.1	-	-0.4446	0.06829	2.924e-10	-	385	1	GTEx-V7_eQTL_EUR_2017
rs181209	rs181209	chr16:28514854	chr16:28503533	T	G	Gene expression	NCIT_C16608	GTEx	25954001	Unspecified	2015	Adipose subcutaneous	TUFM	ENSG00000178952.4	-	0.1747	0.03261	1.619e-07	+	385	1	GTEx-V7_eQTL_EUR_2017
rs181209	rs181209	chr16:28514854	chr16:28503533	T	G	Gene expression	NCIT_C16608	GTEx	25954001	Unspecified	2015	Adipose subcutaneous	SH2B1	ENSG00000178188.10	-	-0.159	0.03082	4.404e-07	-	385	1	GTEx-V7_eQTL_EUR_2017
rs181209	rs181209	chr16:28514854	chr16:28503533	T	G	Gene expression	NCIT_C16608	GTEx	25954001	Unspecified	2015	Adipose visceral omentum	SULT1A2	ENSG00000197165.6	-	0.5379	0.05749	3.921e-18	+	313	1	GTEx-V7_eQTL_EUR_2017
rs181209	rs181209	chr16:28514854	chr16:28503533	T	G	Gene expression	NCIT_C16608	GTEx	25954001	Unspecified	2015	Adipose visceral omentum	-	ENSG00000251417.1	-	-0.3358	0.06653	8.41e-07	-	313	1	GTEx-V7_eQTL_EUR_2017
rs181209	rs181209	chr16:28514854	chr16:28503533	T	G	Gene expression	NCIT_C16608	GTEx	25954001	Unspecified	2015	Adipose visceral omentum	SH2B1	ENSG00000178188.10	-	-0.1423	0.02707	3.076e-07	-	313	1	GTEx-V7_eQTL_EUR_2017
rs181209	rs181209	chr16:28514854	chr16:28503533	T	G	Gene expression	NCIT_C16608	GTEx	25954001	Unspecified	2015	Adrenal gland	SULT1A2	ENSG00000197165.6	-	0.8503	0.09543	2.665e-15	+	175	1	GTEx-V7_eQTL_EUR_2017
rs181209	rs181209	chr16:28514854	chr16:28503533	T	G	Gene expression	NCIT_C16608	GTEx	25954001	Unspecified	2015	Adrenal gland	SH2B1	ENSG00000178188.10	-	-0.2504	0.04412	7.86e-08	-	175	1	GTEx-V7_eQTL_EUR_2017
rs181209	rs181209	chr16:28514854	chr16:28503533	T	G	Gene expression	NCIT_C16608	GTEx	25954001	Unspecified	2015	Adrenal gland	RABEP2	ENSG00000177548.8	-	0.2805	0.04791	3.32e-08	+	175	1	GTEx-V7_eQTL_EUR_2017
rs181209	rs181209	chr16:28514854	chr16:28503533	T	G	Gene expression	NCIT_C16608	GTEx	25954001	Unspecified	2015	Artery aorta	NPIPB7	ENSG00000233232.2	-	-0.5586	0.09372	1.022e-08	-	267	1	GTEx-V7_eQTL_EUR_2017
rs181209	rs181209	chr16:28514854	chr16:28503533	T	G	Gene expression	NCIT_C16608	GTEx	25954001	Unspecified	2015	Artery aorta	NUPR1	ENSG00000176046.7	-	-0.3516	0.06076	2.514e-08	-	267	1	GTEx-V7_eQTL_EUR_2017
rs181209	rs181209	chr16:28514854	chr16:28503533	T	G	Gene expression	NCIT_C16608	GTEx	25954001	Unspecified	2015	Artery aorta	SULT1A2	ENSG00000197165.6	-	0.4551	0.06749	1.409e-10	+	267	1	GTEx-V7_eQTL_EUR_2017
rs181209	rs181209	chr16:28514854	chr16:28503533	T	G	Gene expression	NCIT_C16608	GTEx	25954001	Unspecified	2015	Artery aorta	SULT1A1	ENSG00000196502.7	-	-0.3324	0.06133	1.594e-07	-	267	1	GTEx-V7_eQTL_EUR_2017
rs181209	rs181209	chr16:28514854	chr16:28503533	T	G	Gene expression	NCIT_C16608	GTEx	25954001	Unspecified	2015	Artery aorta	EIF3C	ENSG00000184110.10	-	0.4199	0.07671	1.222e-07	+	267	1	GTEx-V7_eQTL_EUR_2017
rs181209	rs181209	chr16:28514854	chr16:28503533	T	G	Gene expression	NCIT_C16608	GTEx	25954001	Unspecified	2015	Artery aorta	CDC37P1	ENSG00000259982.1	-	0.7195	0.08297	1.046e-15	+	267	1	GTEx-V7_eQTL_EUR_2017
rs181209	rs181209	chr16:28514854	chr16:28503533	T	G	Gene expression	NCIT_C16608	GTEx	25954001	Unspecified	2015	Artery aorta	-	ENSG00000251417.1	-	-0.4833	0.07811	3.051e-09	-	267	1	GTEx-V7_eQTL_EUR_2017
rs181209	rs181209	chr16:28514854	chr16:28503533	T	G	Gene expression	NCIT_C16608	GTEx	25954001	Unspecified	2015	Artery aorta	TUFM	ENSG00000178952.4	-	0.377	0.04442	3.452e-15	+	267	1	GTEx-V7_eQTL_EUR_2017
rs181209	rs181209	chr16:28514854	chr16:28503533	T	G	Gene expression	NCIT_C16608	GTEx	25954001	Unspecified	2015	Artery coronary	NPIPB7	ENSG00000233232.2	-	-0.5921	0.1194	2.464e-06	-	152	1	GTEx-V7_eQTL_EUR_2017
rs181209	rs181209	chr16:28514854	chr16:28503533	T	G	Gene expression	NCIT_C16608	GTEx	25954001	Unspecified	2015	Artery coronary	SULT1A2	ENSG00000197165.6	-	0.4024	0.07366	2.745e-07	+	152	1	GTEx-V7_eQTL_EUR_2017
rs181209	rs181209	chr16:28514854	chr16:28503533	T	G	Gene expression	NCIT_C16608	GTEx	25954001	Unspecified	2015	Artery coronary	CDC37P1	ENSG00000259982.1	-	0.6277	0.1201	7.793e-07	+	152	1	GTEx-V7_eQTL_EUR_2017
rs181209	rs181209	chr16:28514854	chr16:28503533	T	G	Gene expression	NCIT_C16608	GTEx	25954001	Unspecified	2015	Artery tibial	NPIPB7	ENSG00000233232.2	-	-0.483	0.07285	1.416e-10	-	388	1	GTEx-V7_eQTL_EUR_2017
rs181209	rs181209	chr16:28514854	chr16:28503533	T	G	Gene expression	NCIT_C16608	GTEx	25954001	Unspecified	2015	Artery tibial	NUPR1	ENSG00000176046.7	-	-0.3443	0.03861	3.693e-17	-	388	1	GTEx-V7_eQTL_EUR_2017
rs181209	rs181209	chr16:28514854	chr16:28503533	T	G	Gene expression	NCIT_C16608	GTEx	25954001	Unspecified	2015	Artery tibial	CCDC101	ENSG00000176476.4	-	-0.1446	0.02898	9.895e-07	-	388	1	GTEx-V7_eQTL_EUR_2017
rs181209	rs181209	chr16:28514854	chr16:28503533	T	G	Gene expression	NCIT_C16608	GTEx	25954001	Unspecified	2015	Artery tibial	SULT1A2	ENSG00000197165.6	-	0.6001	0.06454	2.252e-18	+	388	1	GTEx-V7_eQTL_EUR_2017
rs181209	rs181209	chr16:28514854	chr16:28503533	T	G	Gene expression	NCIT_C16608	GTEx	25954001	Unspecified	2015	Artery tibial	SULT1A1	ENSG00000196502.7	-	-0.2577	0.04859	2.113e-07	-	388	1	GTEx-V7_eQTL_EUR_2017
rs181209	rs181209	chr16:28514854	chr16:28503533	T	G	Gene expression	NCIT_C16608	GTEx	25954001	Unspecified	2015	Artery tibial	EIF3C	ENSG00000184110.10	-	0.3868	0.06388	3.904e-09	+	388	1	GTEx-V7_eQTL_EUR_2017
rs181209	rs181209	chr16:28514854	chr16:28503533	T	G	Gene expression	NCIT_C16608	GTEx	25954001	Unspecified	2015	Artery tibial	CDC37P1	ENSG00000259982.1	-	0.5747	0.0651	7e-17	+	388	1	GTEx-V7_eQTL_EUR_2017
rs181209	rs181209	chr16:28514854	chr16:28503533	T	G	Gene expression	NCIT_C16608	GTEx	25954001	Unspecified	2015	Artery tibial	-	ENSG00000251417.1	-	-0.5964	0.06304	6.769e-19	-	388	1	GTEx-V7_eQTL_EUR_2017
rs181209	rs181209	chr16:28514854	chr16:28503533	T	G	Gene expression	NCIT_C16608	GTEx	25954001	Unspecified	2015	Artery tibial	TUFM	ENSG00000178952.4	-	0.2493	0.03251	2.065e-13	+	388	1	GTEx-V7_eQTL_EUR_2017
rs181209	rs181209	chr16:28514854	chr16:28503533	T	G	Gene expression	NCIT_C16608	GTEx	25954001	Unspecified	2015	Brain amygdala	SULT1A2	ENSG00000197165.6	-	0.8735	0.1437	6.761e-08	+	88	1	GTEx-V7_eQTL_EUR_2017
rs181209	rs181209	chr16:28514854	chr16:28503533	T	G	Gene expression	NCIT_C16608	GTEx	25954001	Unspecified	2015	Brain amygdala	-	ENSG00000251417.1	-	-0.7245	0.1428	3.399e-06	-	88	1	GTEx-V7_eQTL_EUR_2017
rs181209	rs181209	chr16:28514854	chr16:28503533	T	G	Gene expression	NCIT_C16608	GTEx	25954001	Unspecified	2015	Brain anterior cingulate cortex BA24	SULT1A2	ENSG00000197165.6	-	0.8284	0.1241	2.189e-09	+	109	1	GTEx-V7_eQTL_EUR_2017
rs181209	rs181209	chr16:28514854	chr16:28503533	T	G	Gene expression	NCIT_C16608	GTEx	25954001	Unspecified	2015	Brain caudate basal ganglia	NPIPB7	ENSG00000233232.2	-	-0.5195	0.1073	3.828e-06	-	144	1	GTEx-V7_eQTL_EUR_2017
rs181209	rs181209	chr16:28514854	chr16:28503533	T	G	Gene expression	NCIT_C16608	GTEx	25954001	Unspecified	2015	Brain caudate basal ganglia	SULT1A2	ENSG00000197165.6	-	0.778	0.1129	2.598e-10	+	144	1	GTEx-V7_eQTL_EUR_2017
rs181209	rs181209	chr16:28514854	chr16:28503533	T	G	Gene expression	NCIT_C16608	GTEx	25954001	Unspecified	2015	Brain cerebellar hemisphere	NPIPB7	ENSG00000233232.2	-	-0.6386	0.09082	2.301e-10	-	125	1	GTEx-V7_eQTL_EUR_2017
rs181209	rs181209	chr16:28514854	chr16:28503533	T	G	Gene expression	NCIT_C16608	GTEx	25954001	Unspecified	2015	Brain cerebellar hemisphere	NUPR1	ENSG00000176046.7	-	0.3318	0.06349	9.083e-07	+	125	1	GTEx-V7_eQTL_EUR_2017
rs181209	rs181209	chr16:28514854	chr16:28503533	T	G	Gene expression	NCIT_C16608	GTEx	25954001	Unspecified	2015	Brain cerebellar hemisphere	SULT1A2	ENSG00000197165.6	-	0.668	0.1162	9.164e-08	+	125	1	GTEx-V7_eQTL_EUR_2017
rs181209	rs181209	chr16:28514854	chr16:28503533	T	G	Gene expression	NCIT_C16608	GTEx	25954001	Unspecified	2015	Brain cerebellum	NPIPB7	ENSG00000233232.2	-	-0.6999	0.1023	3.799e-10	-	154	1	GTEx-V7_eQTL_EUR_2017
rs181209	rs181209	chr16:28514854	chr16:28503533	T	G	Gene expression	NCIT_C16608	GTEx	25954001	Unspecified	2015	Brain cerebellum	SULT1A2	ENSG00000197165.6	-	0.642	0.1341	5.022e-06	+	154	1	GTEx-V7_eQTL_EUR_2017
rs181209	rs181209	chr16:28514854	chr16:28503533	T	G	Gene expression	NCIT_C16608	GTEx	25954001	Unspecified	2015	Brain cerebellum	SULT1A1	ENSG00000196502.7	-	-0.5395	0.1098	2.947e-06	-	154	1	GTEx-V7_eQTL_EUR_2017
rs181209	rs181209	chr16:28514854	chr16:28503533	T	G	Gene expression	NCIT_C16608	GTEx	25954001	Unspecified	2015	Brain cortex	NPIPB7	ENSG00000233232.2	-	-0.8126	0.1027	1.829e-12	-	136	1	GTEx-V7_eQTL_EUR_2017
rs181209	rs181209	chr16:28514854	chr16:28503533	T	G	Gene expression	NCIT_C16608	GTEx	25954001	Unspecified	2015	Brain cortex	SULT1A2	ENSG00000197165.6	-	0.7626	0.1214	6.323e-09	+	136	1	GTEx-V7_eQTL_EUR_2017
rs181209	rs181209	chr16:28514854	chr16:28503533	T	G	Gene expression	NCIT_C16608	GTEx	25954001	Unspecified	2015	Brain cortex	SULT1A1	ENSG00000196502.7	-	-0.5742	0.1074	4.701e-07	-	136	1	GTEx-V7_eQTL_EUR_2017
rs181209	rs181209	chr16:28514854	chr16:28503533	T	G	Gene expression	NCIT_C16608	GTEx	25954001	Unspecified	2015	Brain frontal cortex BA9	SULT1A2	ENSG00000197165.6	-	0.6841	0.1151	4.437e-08	+	118	1	GTEx-V7_eQTL_EUR_2017
rs181209	rs181209	chr16:28514854	chr16:28503533	T	G	Gene expression	NCIT_C16608	GTEx	25954001	Unspecified	2015	Brain frontal cortex BA9	SULT1A1	ENSG00000196502.7	-	-0.5795	0.1126	1.411e-06	-	118	1	GTEx-V7_eQTL_EUR_2017
rs181209	rs181209	chr16:28514854	chr16:28503533	T	G	Gene expression	NCIT_C16608	GTEx	25954001	Unspecified	2015	Brain hippocampus	SULT1A2	ENSG00000197165.6	-	0.8267	0.111	5.792e-11	+	111	1	GTEx-V7_eQTL_EUR_2017
rs181209	rs181209	chr16:28514854	chr16:28503533	T	G	Gene expression	NCIT_C16608	GTEx	25954001	Unspecified	2015	Brain hypothalamus	SULT1A2	ENSG00000197165.6	-	0.7193	0.1434	2.791e-06	+	108	1	GTEx-V7_eQTL_EUR_2017
rs181209	rs181209	chr16:28514854	chr16:28503533	T	G	Gene expression	NCIT_C16608	GTEx	25954001	Unspecified	2015	Brain hypothalamus	SULT1A1	ENSG00000196502.7	-	-0.4934	0.1024	6.162e-06	-	108	1	GTEx-V7_eQTL_EUR_2017
rs181209	rs181209	chr16:28514854	chr16:28503533	T	G	Gene expression	NCIT_C16608	GTEx	25954001	Unspecified	2015	Brain hypothalamus	-	ENSG00000251417.1	-	-0.7446	0.1393	7.349e-07	-	108	1	GTEx-V7_eQTL_EUR_2017
rs181209	rs181209	chr16:28514854	chr16:28503533	T	G	Gene expression	NCIT_C16608	GTEx	25954001	Unspecified	2015	Brain nucleus accumbens basal ganglia	NPIPB7	ENSG00000233232.2	-	-0.5248	0.1084	4.326e-06	-	130	1	GTEx-V7_eQTL_EUR_2017
rs181209	rs181209	chr16:28514854	chr16:28503533	T	G	Gene expression	NCIT_C16608	GTEx	25954001	Unspecified	2015	Brain nucleus accumbens basal ganglia	SULT1A2	ENSG00000197165.6	-	0.7278	0.1207	2.347e-08	+	130	1	GTEx-V7_eQTL_EUR_2017
rs181209	rs181209	chr16:28514854	chr16:28503533	T	G	Gene expression	NCIT_C16608	GTEx	25954001	Unspecified	2015	Brain putamen basal ganglia	SULT1A2	ENSG00000197165.6	-	0.7551	0.132	1.401e-07	+	111	1	GTEx-V7_eQTL_EUR_2017
rs181209	rs181209	chr16:28514854	chr16:28503533	T	G	Gene expression	NCIT_C16608	GTEx	25954001	Unspecified	2015	Brain spinal cord cervical c-1	SULT1A2	ENSG00000197165.6	-	0.831	0.1613	2.93e-06	+	83	1	GTEx-V7_eQTL_EUR_2017
rs181209	rs181209	chr16:28514854	chr16:28503533	T	G	Gene expression	NCIT_C16608	GTEx	25954001	Unspecified	2015	Breast mammary tissue	SULT1A2	ENSG00000197165.6	-	0.5131	0.07899	6.463e-10	+	251	1	GTEx-V7_eQTL_EUR_2017
rs181209	rs181209	chr16:28514854	chr16:28503533	T	G	Gene expression	NCIT_C16608	GTEx	25954001	Unspecified	2015	Breast mammary tissue	CDC37P1	ENSG00000259982.1	-	0.5298	0.0862	4.259e-09	+	251	1	GTEx-V7_eQTL_EUR_2017
rs181209	rs181209	chr16:28514854	chr16:28503533	T	G	Gene expression	NCIT_C16608	GTEx	25954001	Unspecified	2015	Breast mammary tissue	-	ENSG00000251417.1	-	-0.3799	0.06719	5.395e-08	-	251	1	GTEx-V7_eQTL_EUR_2017
rs181209	rs181209	chr16:28514854	chr16:28503533	T	G	Gene expression	NCIT_C16608	GTEx	25954001	Unspecified	2015	Cells EBV-transformed lymphocytes	CDC37P1	ENSG00000259982.1	-	0.6942	0.1179	5.842e-08	+	117	1	GTEx-V7_eQTL_EUR_2017
rs181209	rs181209	chr16:28514854	chr16:28503533	T	G	Gene expression	NCIT_C16608	GTEx	25954001	Unspecified	2015	Cells transformed fibroblasts	CDC37P1	ENSG00000259982.1	-	0.4226	0.07511	4.94e-08	+	300	1	GTEx-V7_eQTL_EUR_2017
rs181209	rs181209	chr16:28514854	chr16:28503533	T	G	Gene expression	NCIT_C16608	GTEx	25954001	Unspecified	2015	Colon sigmoid	-	ENSG00000251417.1	-	-0.4031	0.07819	7.151e-07	-	203	1	GTEx-V7_eQTL_EUR_2017
rs181209	rs181209	chr16:28514854	chr16:28503533	T	G	Gene expression	NCIT_C16608	GTEx	25954001	Unspecified	2015	Colon transverse	NPIPB7	ENSG00000233232.2	-	-0.3324	0.07246	7.736e-06	-	246	1	GTEx-V7_eQTL_EUR_2017
rs181209	rs181209	chr16:28514854	chr16:28503533	T	G	Gene expression	NCIT_C16608	GTEx	25954001	Unspecified	2015	Colon transverse	CDC37P1	ENSG00000259982.1	-	0.6477	0.0754	2.011e-15	+	246	1	GTEx-V7_eQTL_EUR_2017
rs181209	rs181209	chr16:28514854	chr16:28503533	T	G	Gene expression	NCIT_C16608	GTEx	25954001	Unspecified	2015	Colon transverse	TUFM	ENSG00000178952.4	-	0.1381	0.02504	1.025e-07	+	246	1	GTEx-V7_eQTL_EUR_2017
rs181209	rs181209	chr16:28514854	chr16:28503533	T	G	Gene expression	NCIT_C16608	GTEx	25954001	Unspecified	2015	Esophagus gastroesophageal junction	SULT1A2	ENSG00000197165.6	-	0.4583	0.07263	2.185e-09	+	213	1	GTEx-V7_eQTL_EUR_2017
rs181209	rs181209	chr16:28514854	chr16:28503533	T	G	Gene expression	NCIT_C16608	GTEx	25954001	Unspecified	2015	Esophagus mucosa	SULT1A2	ENSG00000197165.6	-	0.6408	0.06889	3.439e-18	+	358	1	GTEx-V7_eQTL_EUR_2017
rs181209	rs181209	chr16:28514854	chr16:28503533	T	G	Gene expression	NCIT_C16608	GTEx	25954001	Unspecified	2015	Esophagus mucosa	SULT1A1	ENSG00000196502.7	-	-0.3521	0.05781	3.544e-09	-	358	1	GTEx-V7_eQTL_EUR_2017
rs181209	rs181209	chr16:28514854	chr16:28503533	T	G	Gene expression	NCIT_C16608	GTEx	25954001	Unspecified	2015	Esophagus mucosa	TUFM	ENSG00000178952.4	-	0.1446	0.02668	1.237e-07	+	358	1	GTEx-V7_eQTL_EUR_2017
rs181209	rs181209	chr16:28514854	chr16:28503533	T	G	Gene expression	NCIT_C16608	GTEx	25954001	Unspecified	2015	Esophagus muscularis	NUPR1	ENSG00000176046.7	-	-0.2732	0.04473	3.31e-09	-	335	1	GTEx-V7_eQTL_EUR_2017
rs181209	rs181209	chr16:28514854	chr16:28503533	T	G	Gene expression	NCIT_C16608	GTEx	25954001	Unspecified	2015	Esophagus muscularis	SULT1A2	ENSG00000197165.6	-	0.5132	0.05997	7.424e-16	+	335	1	GTEx-V7_eQTL_EUR_2017
rs181209	rs181209	chr16:28514854	chr16:28503533	T	G	Gene expression	NCIT_C16608	GTEx	25954001	Unspecified	2015	Esophagus muscularis	SULT1A1	ENSG00000196502.7	-	-0.2987	0.05638	2.356e-07	-	335	1	GTEx-V7_eQTL_EUR_2017
rs181209	rs181209	chr16:28514854	chr16:28503533	T	G	Gene expression	NCIT_C16608	GTEx	25954001	Unspecified	2015	Esophagus muscularis	EIF3C	ENSG00000184110.10	-	0.3045	0.05511	7.443e-08	+	335	1	GTEx-V7_eQTL_EUR_2017
rs181209	rs181209	chr16:28514854	chr16:28503533	T	G	Gene expression	NCIT_C16608	GTEx	25954001	Unspecified	2015	Esophagus muscularis	-	ENSG00000251417.1	-	-0.4072	0.06786	6.006e-09	-	335	1	GTEx-V7_eQTL_EUR_2017
rs181209	rs181209	chr16:28514854	chr16:28503533	T	G	Gene expression	NCIT_C16608	GTEx	25954001	Unspecified	2015	Esophagus muscularis	TUFM	ENSG00000178952.4	-	0.2024	0.03354	5e-09	+	335	1	GTEx-V7_eQTL_EUR_2017
rs181209	rs181209	chr16:28514854	chr16:28503533	T	G	Gene expression	NCIT_C16608	GTEx	25954001	Unspecified	2015	Heart atrial appendage	SULT1A2	ENSG00000197165.6	-	0.5406	0.05517	6.145e-19	+	264	1	GTEx-V7_eQTL_EUR_2017
rs181209	rs181209	chr16:28514854	chr16:28503533	T	G	Gene expression	NCIT_C16608	GTEx	25954001	Unspecified	2015	Heart atrial appendage	-	ENSG00000251417.1	-	-0.4183	0.07802	2.156e-07	-	264	1	GTEx-V7_eQTL_EUR_2017
rs181209	rs181209	chr16:28514854	chr16:28503533	T	G	Gene expression	NCIT_C16608	GTEx	25954001	Unspecified	2015	Heart left ventricle	SULT1A2	ENSG00000197165.6	-	0.6786	0.07081	2.115e-18	+	272	1	GTEx-V7_eQTL_EUR_2017
rs181209	rs181209	chr16:28514854	chr16:28503533	T	G	Gene expression	NCIT_C16608	GTEx	25954001	Unspecified	2015	Heart left ventricle	-	ENSG00000251417.1	-	-0.4323	0.08893	2.217e-06	-	272	1	GTEx-V7_eQTL_EUR_2017
rs181209	rs181209	chr16:28514854	chr16:28503533	T	G	Gene expression	NCIT_C16608	GTEx	25954001	Unspecified	2015	Heart left ventricle	SH2B1	ENSG00000178188.10	-	-0.1735	0.0376	6.665e-06	-	272	1	GTEx-V7_eQTL_EUR_2017
rs181209	rs181209	chr16:28514854	chr16:28503533	T	G	Gene expression	NCIT_C16608	GTEx	25954001	Unspecified	2015	Liver	IL27	ENSG00000197272.2	-	0.5038	0.03731	1.509e-25	+	153	1	GTEx-V7_eQTL_EUR_2017
rs181209	rs181209	chr16:28514854	chr16:28503533	T	G	Gene expression	NCIT_C16608	GTEx	25954001	Unspecified	2015	Lung	NPIPB7	ENSG00000233232.2	-	-0.3883	0.07981	1.801e-06	-	383	1	GTEx-V7_eQTL_EUR_2017
rs181209	rs181209	chr16:28514854	chr16:28503533	T	G	Gene expression	NCIT_C16608	GTEx	25954001	Unspecified	2015	Lung	SULT1A1	ENSG00000196502.7	-	-0.3494	0.05722	2.974e-09	-	383	1	GTEx-V7_eQTL_EUR_2017
rs181209	rs181209	chr16:28514854	chr16:28503533	T	G	Gene expression	NCIT_C16608	GTEx	25954001	Unspecified	2015	Lung	CDC37P1	ENSG00000259982.1	-	0.6725	0.07104	6.985e-19	+	383	1	GTEx-V7_eQTL_EUR_2017
rs181209	rs181209	chr16:28514854	chr16:28503533	T	G	Gene expression	NCIT_C16608	GTEx	25954001	Unspecified	2015	Lung	-	ENSG00000251417.1	-	-0.38	0.06785	4.656e-08	-	383	1	GTEx-V7_eQTL_EUR_2017
rs181209	rs181209	chr16:28514854	chr16:28503533	T	G	Gene expression	NCIT_C16608	GTEx	25954001	Unspecified	2015	Lung	TUFM	ENSG00000178952.4	-	0.1579	0.02546	1.745e-09	+	383	1	GTEx-V7_eQTL_EUR_2017
rs181209	rs181209	chr16:28514854	chr16:28503533	T	G	Gene expression	NCIT_C16608	GTEx	25954001	Unspecified	2015	Lung	SH2B1	ENSG00000178188.10	-	-0.1002	0.02226	9.54e-06	-	383	1	GTEx-V7_eQTL_EUR_2017
rs181209	rs181209	chr16:28514854	chr16:28503533	T	G	Gene expression	NCIT_C16608	GTEx	25954001	Unspecified	2015	Muscle skeletal	SULT1A2	ENSG00000197165.6	-	0.7408	0.05618	1.634e-33	+	491	1	GTEx-V7_eQTL_EUR_2017
rs181209	rs181209	chr16:28514854	chr16:28503533	T	G	Gene expression	NCIT_C16608	GTEx	25954001	Unspecified	2015	Muscle skeletal	SULT1A1	ENSG00000196502.7	-	-0.2103	0.04572	5.568e-06	-	491	1	GTEx-V7_eQTL_EUR_2017
rs181209	rs181209	chr16:28514854	chr16:28503533	T	G	Gene expression	NCIT_C16608	GTEx	25954001	Unspecified	2015	Muscle skeletal	-	ENSG00000251417.1	-	-0.3085	0.05801	1.706e-07	-	491	1	GTEx-V7_eQTL_EUR_2017
rs181209	rs181209	chr16:28514854	chr16:28503533	T	G	Gene expression	NCIT_C16608	GTEx	25954001	Unspecified	2015	Muscle skeletal	-	ENSG00000260442.1	-	-0.3183	0.04331	1.035e-12	-	491	1	GTEx-V7_eQTL_EUR_2017
rs181209	rs181209	chr16:28514854	chr16:28503533	T	G	Gene expression	NCIT_C16608	GTEx	25954001	Unspecified	2015	Muscle skeletal	LAT	ENSG00000213658.6	-	0.2128	0.04558	4.099e-06	+	491	1	GTEx-V7_eQTL_EUR_2017
rs181209	rs181209	chr16:28514854	chr16:28503533	T	G	Gene expression	NCIT_C16608	GTEx	25954001	Unspecified	2015	Nerve tibial	-	ENSG00000271623.1	-	-0.6094	0.06712	1.63e-17	-	361	1	GTEx-V7_eQTL_EUR_2017
rs181209	rs181209	chr16:28514854	chr16:28503533	T	G	Gene expression	NCIT_C16608	GTEx	25954001	Unspecified	2015	Nerve tibial	SULT1A2	ENSG00000197165.6	-	0.5104	0.04919	1.081e-21	+	361	1	GTEx-V7_eQTL_EUR_2017
rs181209	rs181209	chr16:28514854	chr16:28503533	T	G	Gene expression	NCIT_C16608	GTEx	25954001	Unspecified	2015	Nerve tibial	SULT1A1	ENSG00000196502.7	-	-0.4559	0.06146	1.277e-12	-	361	1	GTEx-V7_eQTL_EUR_2017
rs181209	rs181209	chr16:28514854	chr16:28503533	T	G	Gene expression	NCIT_C16608	GTEx	25954001	Unspecified	2015	Nerve tibial	CDC37P1	ENSG00000259982.1	-	0.5078	0.07284	2.081e-11	+	361	1	GTEx-V7_eQTL_EUR_2017
rs181209	rs181209	chr16:28514854	chr16:28503533	T	G	Gene expression	NCIT_C16608	GTEx	25954001	Unspecified	2015	Nerve tibial	-	ENSG00000270424.1	-	0.4151	0.07449	5.649e-08	+	361	1	GTEx-V7_eQTL_EUR_2017
rs181209	rs181209	chr16:28514854	chr16:28503533	T	G	Gene expression	NCIT_C16608	GTEx	25954001	Unspecified	2015	Nerve tibial	-	ENSG00000251417.1	-	-0.4459	0.06623	8.746e-11	-	361	1	GTEx-V7_eQTL_EUR_2017
rs181209	rs181209	chr16:28514854	chr16:28503533	T	G	Gene expression	NCIT_C16608	GTEx	25954001	Unspecified	2015	Nerve tibial	TUFM	ENSG00000178952.4	-	0.1773	0.02907	3.346e-09	+	361	1	GTEx-V7_eQTL_EUR_2017
rs181209	rs181209	chr16:28514854	chr16:28503533	T	G	Gene expression	NCIT_C16608	GTEx	25954001	Unspecified	2015	Ovary	-	ENSG00000271623.1	-	-0.6946	0.1182	5.59e-08	-	122	1	GTEx-V7_eQTL_EUR_2017
rs181209	rs181209	chr16:28514854	chr16:28503533	T	G	Gene expression	NCIT_C16608	GTEx	25954001	Unspecified	2015	Ovary	SULT1A2	ENSG00000197165.6	-	0.6608	0.1083	1.992e-08	+	122	1	GTEx-V7_eQTL_EUR_2017
rs181209	rs181209	chr16:28514854	chr16:28503533	T	G	Gene expression	NCIT_C16608	GTEx	25954001	Unspecified	2015	Ovary	-	ENSG00000270424.1	-	0.5613	0.1179	6.544e-06	+	122	1	GTEx-V7_eQTL_EUR_2017
rs181209	rs181209	chr16:28514854	chr16:28503533	T	G	Gene expression	NCIT_C16608	GTEx	25954001	Unspecified	2015	Ovary	TUFM	ENSG00000178952.4	-	0.4036	0.07515	5.113e-07	+	122	1	GTEx-V7_eQTL_EUR_2017
rs181209	rs181209	chr16:28514854	chr16:28503533	T	G	Gene expression	NCIT_C16608	GTEx	25954001	Unspecified	2015	Pancreas	SULT1A2	ENSG00000197165.6	-	0.4551	0.08771	5.593e-07	+	220	1	GTEx-V7_eQTL_EUR_2017
rs181209	rs181209	chr16:28514854	chr16:28503533	T	G	Gene expression	NCIT_C16608	GTEx	25954001	Unspecified	2015	Pancreas	SULT1A1	ENSG00000196502.7	-	-0.3739	0.07659	2.277e-06	-	220	1	GTEx-V7_eQTL_EUR_2017
rs181209	rs181209	chr16:28514854	chr16:28503533	T	G	Gene expression	NCIT_C16608	GTEx	25954001	Unspecified	2015	Pancreas	EIF3C	ENSG00000184110.10	-	0.3827	0.07915	2.816e-06	+	220	1	GTEx-V7_eQTL_EUR_2017
rs181209	rs181209	chr16:28514854	chr16:28503533	T	G	Gene expression	NCIT_C16608	GTEx	25954001	Unspecified	2015	Pancreas	CDC37P1	ENSG00000259982.1	-	0.6865	0.09096	2.026e-12	+	220	1	GTEx-V7_eQTL_EUR_2017
rs181209	rs181209	chr16:28514854	chr16:28503533	T	G	Gene expression	NCIT_C16608	GTEx	25954001	Unspecified	2015	Pancreas	TUFM	ENSG00000178952.4	-	0.3191	0.05696	7.655e-08	+	220	1	GTEx-V7_eQTL_EUR_2017
rs181209	rs181209	chr16:28514854	chr16:28503533	T	G	Gene expression	NCIT_C16608	GTEx	25954001	Unspecified	2015	Pituitary	SULT1A2	ENSG00000197165.6	-	0.3971	0.08383	5.989e-06	+	157	1	GTEx-V7_eQTL_EUR_2017
rs181209	rs181209	chr16:28514854	chr16:28503533	T	G	Gene expression	NCIT_C16608	GTEx	25954001	Unspecified	2015	Pituitary	SULT1A1	ENSG00000196502.7	-	-0.5661	0.08688	1.783e-09	-	157	1	GTEx-V7_eQTL_EUR_2017
rs181209	rs181209	chr16:28514854	chr16:28503533	T	G	Gene expression	NCIT_C16608	GTEx	25954001	Unspecified	2015	Prostate	SULT1A2	ENSG00000197165.6	-	0.7581	0.1017	2.181e-11	+	132	1	GTEx-V7_eQTL_EUR_2017
rs181209	rs181209	chr16:28514854	chr16:28503533	T	G	Gene expression	NCIT_C16608	GTEx	25954001	Unspecified	2015	Skin not sun exposed suprapubic	SBK1	ENSG00000188322.4	-	-0.2256	0.04761	3.405e-06	-	335	1	GTEx-V7_eQTL_EUR_2017
rs181209	rs181209	chr16:28514854	chr16:28503533	T	G	Gene expression	NCIT_C16608	GTEx	25954001	Unspecified	2015	Skin not sun exposed suprapubic	NPIPB7	ENSG00000233232.2	-	-0.3914	0.07167	1.037e-07	-	335	1	GTEx-V7_eQTL_EUR_2017
rs181209	rs181209	chr16:28514854	chr16:28503533	T	G	Gene expression	NCIT_C16608	GTEx	25954001	Unspecified	2015	Skin not sun exposed suprapubic	SULT1A2	ENSG00000197165.6	-	0.3833	0.06373	5.531e-09	+	335	1	GTEx-V7_eQTL_EUR_2017
rs181209	rs181209	chr16:28514854	chr16:28503533	T	G	Gene expression	NCIT_C16608	GTEx	25954001	Unspecified	2015	Skin not sun exposed suprapubic	SULT1A1	ENSG00000196502.7	-	-0.2171	0.04738	6.897e-06	-	335	1	GTEx-V7_eQTL_EUR_2017
rs181209	rs181209	chr16:28514854	chr16:28503533	T	G	Gene expression	NCIT_C16608	GTEx	25954001	Unspecified	2015	Skin not sun exposed suprapubic	-	ENSG00000270424.1	-	0.3585	0.07768	5.96e-06	+	335	1	GTEx-V7_eQTL_EUR_2017
rs181209	rs181209	chr16:28514854	chr16:28503533	T	G	Gene expression	NCIT_C16608	GTEx	25954001	Unspecified	2015	Skin not sun exposed suprapubic	-	ENSG00000251417.1	-	-0.3706	0.07098	3.451e-07	-	335	1	GTEx-V7_eQTL_EUR_2017
rs181209	rs181209	chr16:28514854	chr16:28503533	T	G	Gene expression	NCIT_C16608	GTEx	25954001	Unspecified	2015	Skin not sun exposed suprapubic	TUFM	ENSG00000178952.4	-	0.1763	0.03403	4.239e-07	+	335	1	GTEx-V7_eQTL_EUR_2017
rs181209	rs181209	chr16:28514854	chr16:28503533	T	G	Gene expression	NCIT_C16608	GTEx	25954001	Unspecified	2015	Skin sun exposed lower leg	SBK1	ENSG00000188322.4	-	-0.1742	0.03768	5.3e-06	-	414	1	GTEx-V7_eQTL_EUR_2017
rs181209	rs181209	chr16:28514854	chr16:28503533	T	G	Gene expression	NCIT_C16608	GTEx	25954001	Unspecified	2015	Skin sun exposed lower leg	NPIPB6	ENSG00000198156.6	-	0.2453	0.05	1.425e-06	+	414	1	GTEx-V7_eQTL_EUR_2017
rs181209	rs181209	chr16:28514854	chr16:28503533	T	G	Gene expression	NCIT_C16608	GTEx	25954001	Unspecified	2015	Skin sun exposed lower leg	NPIPB7	ENSG00000233232.2	-	-0.5989	0.06666	1.7e-17	-	414	1	GTEx-V7_eQTL_EUR_2017
rs181209	rs181209	chr16:28514854	chr16:28503533	T	G	Gene expression	NCIT_C16608	GTEx	25954001	Unspecified	2015	Skin sun exposed lower leg	SULT1A2	ENSG00000197165.6	-	0.435	0.06622	1.85e-10	+	414	1	GTEx-V7_eQTL_EUR_2017
rs181209	rs181209	chr16:28514854	chr16:28503533	T	G	Gene expression	NCIT_C16608	GTEx	25954001	Unspecified	2015	Skin sun exposed lower leg	SULT1A1	ENSG00000196502.7	-	-0.2462	0.05068	1.789e-06	-	414	1	GTEx-V7_eQTL_EUR_2017
rs181209	rs181209	chr16:28514854	chr16:28503533	T	G	Gene expression	NCIT_C16608	GTEx	25954001	Unspecified	2015	Skin sun exposed lower leg	-	ENSG00000270424.1	-	0.4045	0.07471	1.15e-07	+	414	1	GTEx-V7_eQTL_EUR_2017
rs181209	rs181209	chr16:28514854	chr16:28503533	T	G	Gene expression	NCIT_C16608	GTEx	25954001	Unspecified	2015	Skin sun exposed lower leg	-	ENSG00000251417.1	-	-0.4432	0.07036	9.107e-10	-	414	1	GTEx-V7_eQTL_EUR_2017
rs181209	rs181209	chr16:28514854	chr16:28503533	T	G	Gene expression	NCIT_C16608	GTEx	25954001	Unspecified	2015	Skin sun exposed lower leg	TUFM	ENSG00000178952.4	-	0.2257	0.02624	2.778e-16	+	414	1	GTEx-V7_eQTL_EUR_2017
rs181209	rs181209	chr16:28514854	chr16:28503533	T	G	Gene expression	NCIT_C16608	GTEx	25954001	Unspecified	2015	Small intestine terminal ileum	CDC37P1	ENSG00000259982.1	-	0.5735	0.1176	4.042e-06	+	122	1	GTEx-V7_eQTL_EUR_2017
rs181209	rs181209	chr16:28514854	chr16:28503533	T	G	Gene expression	NCIT_C16608	GTEx	25954001	Unspecified	2015	Small intestine terminal ileum	-	ENSG00000251417.1	-	-0.6067	0.0987	1.627e-08	-	122	1	GTEx-V7_eQTL_EUR_2017
rs181209	rs181209	chr16:28514854	chr16:28503533	T	G	Gene expression	NCIT_C16608	GTEx	25954001	Unspecified	2015	Spleen	SULT1A2	ENSG00000197165.6	-	0.5538	0.07862	1.137e-10	+	146	1	GTEx-V7_eQTL_EUR_2017
rs181209	rs181209	chr16:28514854	chr16:28503533	T	G	Gene expression	NCIT_C16608	GTEx	25954001	Unspecified	2015	Spleen	-	ENSG00000251417.1	-	-0.6003	0.1081	1.618e-07	-	146	1	GTEx-V7_eQTL_EUR_2017
rs181209	rs181209	chr16:28514854	chr16:28503533	T	G	Gene expression	NCIT_C16608	GTEx	25954001	Unspecified	2015	Stomach	SULT1A2	ENSG00000197165.6	-	0.517	0.08351	3.337e-09	+	237	1	GTEx-V7_eQTL_EUR_2017
rs181209	rs181209	chr16:28514854	chr16:28503533	T	G	Gene expression	NCIT_C16608	GTEx	25954001	Unspecified	2015	Stomach	SULT1A1	ENSG00000196502.7	-	-0.3588	0.05391	2.658e-10	-	237	1	GTEx-V7_eQTL_EUR_2017
rs181209	rs181209	chr16:28514854	chr16:28503533	T	G	Gene expression	NCIT_C16608	GTEx	25954001	Unspecified	2015	Stomach	CDC37P1	ENSG00000259982.1	-	0.5345	0.08008	2.392e-10	+	237	1	GTEx-V7_eQTL_EUR_2017
rs181209	rs181209	chr16:28514854	chr16:28503533	T	G	Gene expression	NCIT_C16608	GTEx	25954001	Unspecified	2015	Stomach	NPIPB9	ENSG00000196993.4	-	-0.4053	0.08275	1.999e-06	-	237	1	GTEx-V7_eQTL_EUR_2017
rs181209	rs181209	chr16:28514854	chr16:28503533	T	G	Gene expression	NCIT_C16608	GTEx	25954001	Unspecified	2015	Testis	NPIPB6	ENSG00000198156.6	-	-0.4816	0.05028	5.978e-18	-	225	1	GTEx-V7_eQTL_EUR_2017
rs181209	rs181209	chr16:28514854	chr16:28503533	T	G	Gene expression	NCIT_C16608	GTEx	25954001	Unspecified	2015	Testis	-	ENSG00000271623.1	-	-0.7131	0.07722	5.522e-17	-	225	1	GTEx-V7_eQTL_EUR_2017
rs181209	rs181209	chr16:28514854	chr16:28503533	T	G	Gene expression	NCIT_C16608	GTEx	25954001	Unspecified	2015	Testis	NPIPB7	ENSG00000233232.2	-	-0.6143	0.06129	3.255e-19	-	225	1	GTEx-V7_eQTL_EUR_2017
rs181209	rs181209	chr16:28514854	chr16:28503533	T	G	Gene expression	NCIT_C16608	GTEx	25954001	Unspecified	2015	Testis	IL27	ENSG00000197272.2	-	0.5243	0.0815	1.007e-09	+	225	1	GTEx-V7_eQTL_EUR_2017
rs181209	rs181209	chr16:28514854	chr16:28503533	T	G	Gene expression	NCIT_C16608	GTEx	25954001	Unspecified	2015	Testis	SULT1A2	ENSG00000197165.6	-	0.7845	0.08816	4.733e-16	+	225	1	GTEx-V7_eQTL_EUR_2017
rs181209	rs181209	chr16:28514854	chr16:28503533	T	G	Gene expression	NCIT_C16608	GTEx	25954001	Unspecified	2015	Testis	EIF3C	ENSG00000184110.10	-	0.3183	0.06162	6.103e-07	+	225	1	GTEx-V7_eQTL_EUR_2017
rs181209	rs181209	chr16:28514854	chr16:28503533	T	G	Gene expression	NCIT_C16608	GTEx	25954001	Unspecified	2015	Testis	CDC37P1	ENSG00000259982.1	-	0.5568	0.09024	4.107e-09	+	225	1	GTEx-V7_eQTL_EUR_2017
rs181209	rs181209	chr16:28514854	chr16:28503533	T	G	Gene expression	NCIT_C16608	GTEx	25954001	Unspecified	2015	Testis	-	ENSG00000270424.1	-	0.4811	0.09275	5.503e-07	+	225	1	GTEx-V7_eQTL_EUR_2017
rs181209	rs181209	chr16:28514854	chr16:28503533	T	G	Gene expression	NCIT_C16608	GTEx	25954001	Unspecified	2015	Testis	TUFM	ENSG00000178952.4	-	0.2503	0.05178	2.773e-06	+	225	1	GTEx-V7_eQTL_EUR_2017
rs181209	rs181209	chr16:28514854	chr16:28503533	T	G	Gene expression	NCIT_C16608	GTEx	25954001	Unspecified	2015	Testis	NFATC2IP	ENSG00000176953.6	-	0.2494	0.04854	6.95e-07	+	225	1	GTEx-V7_eQTL_EUR_2017
rs181209	rs181209	chr16:28514854	chr16:28503533	T	G	Gene expression	NCIT_C16608	GTEx	25954001	Unspecified	2015	Thyroid	-	ENSG00000271623.1	-	-0.5204	0.06639	6.268e-14	-	399	1	GTEx-V7_eQTL_EUR_2017
rs181209	rs181209	chr16:28514854	chr16:28503533	T	G	Gene expression	NCIT_C16608	GTEx	25954001	Unspecified	2015	Thyroid	NPIPB7	ENSG00000233232.2	-	-0.3916	0.06294	1.48e-09	-	399	1	GTEx-V7_eQTL_EUR_2017
rs181209	rs181209	chr16:28514854	chr16:28503533	T	G	Gene expression	NCIT_C16608	GTEx	25954001	Unspecified	2015	Thyroid	SULT1A1	ENSG00000196502.7	-	-0.4801	0.05711	1.269e-15	-	399	1	GTEx-V7_eQTL_EUR_2017
rs181209	rs181209	chr16:28514854	chr16:28503533	T	G	Gene expression	NCIT_C16608	GTEx	25954001	Unspecified	2015	Thyroid	CDC37P1	ENSG00000259982.1	-	0.6761	0.0645	2.129e-22	+	399	1	GTEx-V7_eQTL_EUR_2017
rs181209	rs181209	chr16:28514854	chr16:28503533	T	G	Gene expression	NCIT_C16608	GTEx	25954001	Unspecified	2015	Thyroid	-	ENSG00000270424.1	-	0.5243	0.0705	8.823e-13	+	399	1	GTEx-V7_eQTL_EUR_2017
rs181209	rs181209	chr16:28514854	chr16:28503533	T	G	Gene expression	NCIT_C16608	GTEx	25954001	Unspecified	2015	Thyroid	-	ENSG00000251417.1	-	-0.2716	0.05698	2.801e-06	-	399	1	GTEx-V7_eQTL_EUR_2017
rs181209	rs181209	chr16:28514854	chr16:28503533	T	G	Gene expression	NCIT_C16608	GTEx	25954001	Unspecified	2015	Thyroid	TUFM	ENSG00000178952.4	-	0.2104	0.02729	1.483e-13	+	399	1	GTEx-V7_eQTL_EUR_2017
rs181209	rs181209	chr16:28514854	chr16:28503533	T	G	Gene expression	NCIT_C16608	GTEx	25954001	Unspecified	2015	Uterus	SULT1A2	ENSG00000197165.6	-	0.7051	0.1313	7.679e-07	+	101	1	GTEx-V7_eQTL_EUR_2017
rs181209	rs181209	chr16:28514854	chr16:28503533	T	G	Gene expression	NCIT_C16608	GTEx	25954001	Unspecified	2015	Uterus	TUFM	ENSG00000178952.4	-	0.3838	0.07998	7.405e-06	+	101	1	GTEx-V7_eQTL_EUR_2017
rs181209	rs181209	chr16:28514854	chr16:28503533	T	G	Gene expression	NCIT_C16608	GTEx	25954001	Unspecified	2015	Vagina	SULT1A2	ENSG00000197165.6	-	0.5672	0.1135	3.104e-06	+	106	1	GTEx-V7_eQTL_EUR_2017
rs181209	rs181209	chr16:28514854	chr16:28503533	T	G	Gene expression	NCIT_C16608	GTEx	25954001	Unspecified	2015	Whole blood	NPIPB7	ENSG00000233232.2	-	-0.3792	0.06483	1.285e-08	-	369	1	GTEx-V7_eQTL_EUR_2017
rs181209	rs181209	chr16:28514854	chr16:28503533	T	G	Gene expression	NCIT_C16608	GTEx	25954001	Unspecified	2015	Whole blood	CCDC101	ENSG00000176476.4	-	-0.1628	0.03374	2.224e-06	-	369	1	GTEx-V7_eQTL_EUR_2017
rs181209	rs181209	chr16:28514854	chr16:28503533	T	G	Gene expression	NCIT_C16608	GTEx	25954001	Unspecified	2015	Whole blood	SULT1A2	ENSG00000197165.6	-	0.8731	0.05839	3.189e-38	+	369	1	GTEx-V7_eQTL_EUR_2017
rs181209	rs181209	chr16:28514854	chr16:28503533	T	G	Gene expression	NCIT_C16608	GTEx	25954001	Unspecified	2015	Whole blood	SULT1A1	ENSG00000196502.7	-	-0.281	0.04876	2.03e-08	-	369	1	GTEx-V7_eQTL_EUR_2017
rs181209	rs181209	chr16:28514854	chr16:28503533	T	G	Gene expression	NCIT_C16608	GTEx	25954001	Unspecified	2015	Whole blood	TUFM	ENSG00000178952.4	-	0.428	0.0375	2.543e-25	+	369	1	GTEx-V7_eQTL_EUR_2017
rs181209	rs181209	chr16:28514854	chr16:28503533	T	G	Gene expression	NCIT_C16608	GTEx	25954001	Unspecified	2015	Whole blood	SPNS1	ENSG00000169682.13	-	0.186	0.02753	7.276e-11	+	369	1	GTEx-V7_eQTL_EUR_2017
rs181209	rs181209	chr16:28514854	chr16:28503533	T	G	Exon expression	NCIT_C16608	Geuvadis	24037378	European	2013	Lymphoblastoid cell lines	SPNS1	ENSG00000169682.13	ENSG00000169682.13_28993677_28993866	NA	NA	1.419e-09	NA	462	1	Geuvadis_eQTL_EUR_2013
rs181209	rs181209	chr16:28514854	chr16:28503533	T	G	Exon expression	NCIT_C16608	Geuvadis	24037378	European	2013	Lymphoblastoid cell lines	SPNS1	ENSG00000169682.13	ENSG00000169682.13_28990476_28990627	NA	NA	4.214e-08	NA	462	1	Geuvadis_eQTL_EUR_2013
rs181209	rs181209	chr16:28514854	chr16:28503533	T	G	Exon expression	NCIT_C16608	Geuvadis	24037378	European	2013	Lymphoblastoid cell lines	SPNS1	ENSG00000169682.13	ENSG00000169682.13_28989229_28989365	NA	NA	1.567e-07	NA	462	1	Geuvadis_eQTL_EUR_2013
rs181209	rs181209	chr16:28514854	chr16:28503533	T	G	Exon expression	NCIT_C16608	Geuvadis	24037378	European	2013	Lymphoblastoid cell lines	SPNS1	ENSG00000169682.13	ENSG00000169682.13_28990726_28990792	NA	NA	6.413e-08	NA	462	1	Geuvadis_eQTL_EUR_2013
rs181209	rs181209	chr16:28514854	chr16:28503533	T	G	Exon expression	NCIT_C16608	Geuvadis	24037378	European	2013	Lymphoblastoid cell lines	SPNS1	ENSG00000169682.13	ENSG00000169682.13_28986813_28986878	NA	NA	1.415e-08	NA	462	1	Geuvadis_eQTL_EUR_2013
rs181209	rs181209	chr16:28514854	chr16:28503533	T	G	Exon expression	NCIT_C16608	Geuvadis	24037378	European	2013	Lymphoblastoid cell lines	SPNS1	ENSG00000169682.13	ENSG00000169682.13_28994178_28994243	NA	NA	1.236e-06	NA	462	1	Geuvadis_eQTL_EUR_2013
rs181209	rs181209	chr16:28514854	chr16:28503533	T	G	Exon expression	NCIT_C16608	Geuvadis	24037378	European	2013	Lymphoblastoid cell lines	SPNS1	ENSG00000169682.13	ENSG00000169682.13_28986093_28986713	NA	NA	3.366e-07	NA	462	1	Geuvadis_eQTL_EUR_2013
rs181209	rs181209	chr16:28514854	chr16:28503533	T	G	Exon expression	NCIT_C16608	Geuvadis	24037378	European	2013	Lymphoblastoid cell lines	SPNS1	ENSG00000169682.13	ENSG00000169682.13_28993222_28993377	NA	NA	2.397e-08	NA	462	1	Geuvadis_eQTL_EUR_2013
rs181209	rs181209	chr16:28514854	chr16:28503533	T	G	Exon expression	NCIT_C16608	Geuvadis	24037378	European	2013	Lymphoblastoid cell lines	NFATC2IP	ENSG00000176953.6	ENSG00000176953.6_28975026_28978418	NA	NA	7.533e-08	NA	462	1	Geuvadis_eQTL_EUR_2013
rs181209	rs181209	chr16:28514854	chr16:28503533	T	G	Exon expression	NCIT_C16608	Geuvadis	24037378	European	2013	Lymphoblastoid cell lines	EIF3C	ENSG00000184110.9	ENSG00000184110.9_28726628_28726755	NA	NA	6.357e-07	NA	462	1	Geuvadis_eQTL_EUR_2013
rs181209	rs181209	chr16:28514854	chr16:28503533	T	G	Exon expression	NCIT_C16608	Geuvadis	24037378	European	2013	Lymphoblastoid cell lines	EIF3C	ENSG00000184110.9	ENSG00000184110.9_28734485_28734644	NA	NA	4.235e-08	NA	462	1	Geuvadis_eQTL_EUR_2013
rs181209	rs181209	chr16:28514854	chr16:28503533	T	G	Exon expression	NCIT_C16608	Geuvadis	24037378	European	2013	Lymphoblastoid cell lines	EIF3C	ENSG00000184110.9	ENSG00000184110.9_28725022_28725087	NA	NA	4.426e-07	NA	462	1	Geuvadis_eQTL_EUR_2013
rs181209	rs181209	chr16:28514854	chr16:28503533	T	G	Exon expression	NCIT_C16608	Geuvadis	24037378	European	2013	Lymphoblastoid cell lines	EIF3C	ENSG00000184110.9	ENSG00000184110.9_28734769_28734872	NA	NA	6.88e-07	NA	462	1	Geuvadis_eQTL_EUR_2013
rs181209	rs181209	chr16:28514854	chr16:28503533	T	G	Exon expression	NCIT_C16608	Geuvadis	24037378	European	2013	Lymphoblastoid cell lines	EIF3CL	ENSG00000205609.7	ENSG00000205609.7_28391613_28391700	NA	NA	5.563e-08	NA	462	1	Geuvadis_eQTL_EUR_2013
rs181209	rs181209	chr16:28514854	chr16:28503533	T	G	Exon expression	NCIT_C16608	Geuvadis	24037378	European	2013	Lymphoblastoid cell lines	EIF3CL	ENSG00000205609.7	ENSG00000205609.7_28403301_28403463	NA	NA	7.481e-08	NA	462	1	Geuvadis_eQTL_EUR_2013
rs181209	rs181209	chr16:28514854	chr16:28503533	T	G	Exon expression	NCIT_C16608	Geuvadis	24037378	European	2013	Lymphoblastoid cell lines	EIF3CL	ENSG00000205609.7	ENSG00000205609.7_28411192_28411319	NA	NA	7.272e-07	NA	462	1	Geuvadis_eQTL_EUR_2013
rs181209	rs181209	chr16:28514854	chr16:28503533	T	G	Exon expression	NCIT_C16608	Geuvadis	24037378	European	2013	Lymphoblastoid cell lines	EIF3CL	ENSG00000205609.7	ENSG00000205609.7_28391297_28391459	NA	NA	3.548e-06	NA	462	1	Geuvadis_eQTL_EUR_2013
rs181209	rs181209	chr16:28514854	chr16:28503533	T	G	Gene expression	NCIT_C16608	Geuvadis	24037378	European	2013	Lymphoblastoid cell lines	EIF3C	ENSG00000184110.9	ENSG00000184110.9	NA	NA	3.903e-09	NA	462	1	Geuvadis_eQTL_EUR_2013
rs181209	rs181209	chr16:28514854	chr16:28503533	T	G	Gene expression	NCIT_C16608	Geuvadis	24037378	European	2013	Lymphoblastoid cell lines	EIF3CL	ENSG00000205609.7	ENSG00000205609.7	NA	NA	1.811e-10	NA	462	1	Geuvadis_eQTL_EUR_2013
rs181209	rs181209	chr16:28514854	chr16:28503533	T	G	Gene expression	NCIT_C16608	Joehanes R	28122634	Mixed	2017	Whole blood	APOBR;CLN3	-	3686635	0.4514	0.00852	0	+	5257	1	Joehanes-R_eQTL_EUR_2017
rs181209	rs181209	chr16:28514854	chr16:28503533	T	G	Gene expression	NCIT_C16608	Joehanes R	28122634	Mixed	2017	Whole blood	TUFM	-	3686728	0.0881	0.0036	1.626e-125	+	5257	1	Joehanes-R_eQTL_EUR_2017
rs181209	rs181209	chr16:28514854	chr16:28503533	T	G	Gene expression	NCIT_C16608	Joehanes R	28122634	Mixed	2017	Whole blood	CCDC101;LOC613038	-	3686587	-0.0439	0.00438	1.993e-23	-	5257	1	Joehanes-R_eQTL_EUR_2017
rs181209	rs181209	chr16:28514854	chr16:28503533	T	G	Gene expression	NCIT_C16608	Joehanes R	28122634	Mixed	2017	Whole blood	SPNS1	-	3655172	0.0254	0.00293	6.486e-18	+	5257	1	Joehanes-R_eQTL_EUR_2017
rs181209	rs181209	chr16:28514854	chr16:28503533	T	G	Gene expression	NCIT_C16608	Joehanes R	28122634	Mixed	2017	Whole blood	SULT1A1;SULT1A2	-	3654614	-0.0324	0.00417	8.919e-15	-	5257	1	Joehanes-R_eQTL_EUR_2017
rs181209	rs181209	chr16:28514854	chr16:28503533	T	G	Gene expression	NCIT_C16608	Joehanes R	28122634	Mixed	2017	Whole blood	STAT1;GLS	-	2592268	-0.0275	0.00437	3.261e-10	-	5257	1	Joehanes-R_eQTL_EUR_2017
rs181209	rs181209	chr16:28514854	chr16:28503533	T	G	Gene expression	NCIT_C16608	Joehanes R	28122634	Mixed	2017	Whole blood	LAT	-	3654956	0.0198	0.00329	1.836e-09	+	5257	1	Joehanes-R_eQTL_EUR_2017
rs181209	rs181209	chr16:28514854	chr16:28503533	T	G	Gene expression	NCIT_C16608	Joehanes R	28122634	Mixed	2017	Whole blood	GBP4	-	2421995	-0.0354	0.00615	9.285e-09	-	5257	1	Joehanes-R_eQTL_EUR_2017
rs181209	rs181209	chr16:28514854	chr16:28503533	T	G	Gene expression	NCIT_C16608	Joehanes R	28122634	Mixed	2017	Whole blood	APOL3	-	3959350	-0.0243	0.00466	1.962e-07	-	5257	1	Joehanes-R_eQTL_EUR_2017
rs181209	rs181209	chr16:28514854	chr16:28503533	T	G	Gene expression	NCIT_C16608	Joehanes R	28122634	Mixed	2017	Whole blood	ATXN2L	-	3654859	-0.0122	0.0026	2.676e-06	-	5257	1	Joehanes-R_eQTL_EUR_2017
rs181209	rs181209	chr16:28514854	chr16:28503533	T	G	Gene expression	NCIT_C16608	Joehanes R	28122634	Mixed	2017	Whole blood	ATP2A1	-	3655060	0.0141	0.00317	8.921e-06	+	5257	1	Joehanes-R_eQTL_EUR_2017
rs181209	rs181209	chr16:28514854	chr16:28503533	T	G	Gene expression	NCIT_C16608	eQTLGen	eQTLGen	European	2018	Whole blood	TUFM	ENSG00000178952	-	NA	NA	3.27000000000002e-310	+	30746	35	eQTLGen_eQTL_EUR_2018
rs181209	rs181209	chr16:28514854	chr16:28503533	T	G	Gene expression	NCIT_C16608	eQTLGen	eQTLGen	European	2018	Whole blood	CCDC101	ENSG00000176476	-	NA	NA	3.27000000000002e-310	-	30532	34	eQTLGen_eQTL_EUR_2018
rs181209	rs181209	chr16:28514854	chr16:28503533	T	G	Gene expression	NCIT_C16608	eQTLGen	eQTLGen	European	2018	Whole blood	SPNS1	ENSG00000169682	-	NA	NA	3.27000000000002e-310	+	30746	35	eQTLGen_eQTL_EUR_2018
rs181209	rs181209	chr16:28514854	chr16:28503533	T	G	Gene expression	NCIT_C16608	eQTLGen	eQTLGen	European	2018	Whole blood	SULT1A2	ENSG00000197165	-	NA	NA	2.66e-133	+	14263	16	eQTLGen_eQTL_EUR_2018
rs181209	rs181209	chr16:28514854	chr16:28503533	T	G	Gene expression	NCIT_C16608	eQTLGen	eQTLGen	European	2018	Whole blood	SBK1	ENSG00000188322	-	NA	NA	4.45e-54	-	25671	34	eQTLGen_eQTL_EUR_2018
rs181209	rs181209	chr16:28514854	chr16:28503533	T	G	Gene expression	NCIT_C16608	eQTLGen	eQTLGen	European	2018	Whole blood	APOBR	ENSG00000184730	-	NA	NA	1.11e-52	+	24752	33	eQTLGen_eQTL_EUR_2018
rs181209	rs181209	chr16:28514854	chr16:28503533	T	G	Gene expression	NCIT_C16608	eQTLGen	eQTLGen	European	2018	Whole blood	EIF3CL	ENSG00000205609	-	NA	NA	6.1e-52	+	5502	13	eQTLGen_eQTL_EUR_2018
rs181209	rs181209	chr16:28514854	chr16:28503533	T	G	Gene expression	NCIT_C16608	eQTLGen	eQTLGen	European	2018	Whole blood	CLN3	ENSG00000188603	-	NA	NA	2.7e-34	-	25457	33	eQTLGen_eQTL_EUR_2018
rs181209	rs181209	chr16:28514854	chr16:28503533	T	G	Gene expression	NCIT_C16608	eQTLGen	eQTLGen	European	2018	Whole blood	IL27	ENSG00000197272	-	NA	NA	1.84e-31	+	25671	34	eQTLGen_eQTL_EUR_2018
rs181209	rs181209	chr16:28514854	chr16:28503533	T	G	Gene expression	NCIT_C16608	eQTLGen	eQTLGen	European	2018	Whole blood	EIF3C	ENSG00000184110	-	NA	NA	2.4e-25	+	5502	13	eQTLGen_eQTL_EUR_2018
rs181209	rs181209	chr16:28514854	chr16:28503533	T	G	Gene expression	NCIT_C16608	eQTLGen	eQTLGen	European	2018	Whole blood	RP11-1348G14.4	ENSG00000251417	-	NA	NA	1.06e-20	-	5502	13	eQTLGen_eQTL_EUR_2018
rs181209	rs181209	chr16:28514854	chr16:28503533	T	G	Gene expression	NCIT_C16608	eQTLGen	eQTLGen	European	2018	Whole blood	RP11-264B17.3	ENSG00000261067	-	NA	NA	2.22e-15	+	26722	32	eQTLGen_eQTL_EUR_2018
rs181209	rs181209	chr16:28514854	chr16:28503533	T	G	Gene expression	NCIT_C16608	eQTLGen	eQTLGen	European	2018	Whole blood	ATP2A1	ENSG00000196296	-	NA	NA	3.73e-15	+	30532	34	eQTLGen_eQTL_EUR_2018
rs181209	rs181209	chr16:28514854	chr16:28503533	T	G	Gene expression	NCIT_C16608	eQTLGen	eQTLGen	European	2018	Whole blood	RP11-57A19.2	ENSG00000246465	-	NA	NA	3.98e-08	-	4868	12	eQTLGen_eQTL_EUR_2018
rs181209	rs181209	chr16:28514854	chr16:28503533	T	G	Gene expression	NCIT_C16608	eQTLGen	eQTLGen	European	2018	Whole blood	A-575C2.4	ENSG00000198156	-	NA	NA	1.57e-07	+	4360	11	eQTLGen_eQTL_EUR_2018
rs181209	rs181209	chr16:28514854	chr16:28503533	T	G	Gene expression	NCIT_C16608	eQTLGen	eQTLGen	European	2018	Whole blood	XPO6	ENSG00000169180	-	NA	NA	3.34e-07	-	30746	35	eQTLGen_eQTL_EUR_2018
rs181209	rs181209	chr16:28514854	chr16:28503533	T	G	Gene expression	NCIT_C16608	eQTLGen	eQTLGen	European	2018	Whole blood	SH2B1	ENSG00000178188	-	NA	NA	6.85e-06	-	30532	34	eQTLGen_eQTL_EUR_2018
rs181209	rs181209	chr16:28514854	chr16:28503533	T	G	Gene expression	NCIT_C16608	eQTLGen	eQTLGen	European	2018	Whole blood	NUPR1	ENSG00000176046	-	NA	NA	8.4e-06	+	28280	30	eQTLGen_eQTL_EUR_2018
rs181209	rs181209	chr16:28514854	chr16:28503533	T	G	Gene expression	NCIT_C16608	Fairfax B	22446964	European	2012	Monocytes	SPNS1	-	-	NA	NA	2.19e-08	NA	288	1	eQTL_2017
rs181209	rs181209	chr16:28514854	chr16:28503533	T	G	Gene expression	NCIT_C16608	Fairfax B	22446964	European	2012	Monocytes	CCDC101	-	-	NA	NA	8.59e-06	NA	288	1	eQTL_2017
rs181209	rs181209	chr16:28514854	chr16:28503533	T	G	Gene expression	NCIT_C16608	Fairfax B	22446964	European	2012	Monocytes	SULT1A1	-	-	NA	NA	6.09e-06	NA	288	1	eQTL_2017
rs181209	rs181209	chr16:28514854	chr16:28503533	T	G	Gene expression	NCIT_C16608	Fairfax B	24604202	European	2014	Blood	SPNS1	-	-	NA	NA	1.54e-26	NA	432	1	eQTL_2017
rs181209	rs181209	chr16:28514854	chr16:28503533	T	G	Gene expression	NCIT_C16608	Fairfax B	24604202	European	2014	Blood	CCDC101	-	-	NA	NA	2.8e-32	NA	432	1	eQTL_2017
Table S5B
SNP	RSID	Pos (hg19)	Alleles	Trait	efo	study	PMID	Ancestry	Year of publication	beta	se	p	direction	N	n_cases	n_controls	n_studies	unit	dataset
rs181209	rs181209	chr16:28514854	T/G	Mean corpuscular volume	EFO_0004586	Astle W	27863252	European	2016	0.02432	0.003758	9.704e-11	+	173480	0	173480	2	IVNT	Astle-W_Blood-Cell-Traits_EUR_2016
rs181209	rs181209	chr16:28514854	T/G	Red blood cell count	EFO_0004586	Astle W	27863252	European	2016	-0.02153	0.003788	1.317e-08	-	173480	0	173480	2	IVNT	Astle-W_Blood-Cell-Traits_EUR_2016
rs181209	rs181209	chr16:28514854	T/G	Hip circumference	EFO_0005093	GIANT	25673412	European	2015	0.027	0.0058	4.2e-06	+	79538	0	79538	101	IVNT	GIANT_Hip_EUR_2015
rs181209	rs181209	chr16:28514854	T/G	Nonsyndromic striae distensae stretch marks	-	Tung	23633020	European	2013	NA	NA	8.86e-06	NA	33930	-	-	-	-	GRASP
rs181209	rs181209	chr16:28514854	T/G	Crohns disease	EFO_0000384	IBDGC	26192919	European	2015	0.1366	0.026	1.559e-07	+	20883	5956	14927	7	log OR	IBDGC_Chrons-Disease_EUR_2015
rs181209	rs181209	chr16:28514854	T/G	Inflammatory bowel disease	EFO_0003767	IBDGC	26192919	European	2015	0.0993	0.0191	2.126e-07	+	34652	12882	21770	15	log OR	IBDGC_IBD_EUR_2015
rs181209	rs181209	chr16:28514854	T/G	Alcohol intake frequency	EFO_0004329	Neale B	UKBB	European	2017	0.02868	0.003772	2.894e-14	+	336965	0	336965	1	-	Neale-B_UKBB_EUR_2017
rs181209	rs181209	chr16:28514854	T/G	Arm fat mass left	-	Neale B	UKBB	European	2017	0.02531	0.002527	1.347e-23	+	331164	0	331164	1	IVNT	Neale-B_UKBB_EUR_2017
rs181209	rs181209	chr16:28514854	T/G	Arm fat mass right	-	Neale B	UKBB	European	2017	0.02542	0.002527	8.258e-24	+	331226	0	331226	1	IVNT	Neale-B_UKBB_EUR_2017
rs181209	rs181209	chr16:28514854	T/G	Arm fat percentage left	-	Neale B	UKBB	European	2017	0.01997	0.001952	1.457e-24	+	331198	0	331198	1	IVNT	Neale-B_UKBB_EUR_2017
rs181209	rs181209	chr16:28514854	T/G	Arm fat percentage right	-	Neale B	UKBB	European	2017	0.02029	0.001961	4.402e-25	+	331249	0	331249	1	IVNT	Neale-B_UKBB_EUR_2017
rs181209	rs181209	chr16:28514854	T/G	Arm fat-free mass left	-	Neale B	UKBB	European	2017	0.007561	0.00164	4.005e-06	+	331159	0	331159	1	IVNT	Neale-B_UKBB_EUR_2017
rs181209	rs181209	chr16:28514854	T/G	Arm predicted mass left	-	Neale B	UKBB	European	2017	0.00781	0.001634	1.744e-06	+	331146	0	331146	1	IVNT	Neale-B_UKBB_EUR_2017
rs181209	rs181209	chr16:28514854	T/G	Basal metabolic rate	EFO_0007777	Neale B	UKBB	European	2017	0.01164	0.00171	9.807e-12	+	331307	0	331307	1	IVNT	Neale-B_UKBB_EUR_2017
rs181209	rs181209	chr16:28514854	T/G	Body fat percentage	EFO_0007800	Neale B	UKBB	European	2017	0.01923	0.001977	2.374e-22	+	331117	0	331117	1	IVNT	Neale-B_UKBB_EUR_2017
rs181209	rs181209	chr16:28514854	T/G	Body mass index	EFO_0004340	Neale B	UKBB	European	2017	0.02228	0.00255	2.456e-18	+	336107	0	336107	1	IVNT	Neale-B_UKBB_EUR_2017
rs181209	rs181209	chr16:28514854	T/G	Comparative body size at age 10	-	Neale B	UKBB	European	2017	0.009339	0.001765	1.215e-07	+	331693	0	331693	1	-	Neale-B_UKBB_EUR_2017
rs181209	rs181209	chr16:28514854	T/G	Comparative height size at age 10	-	Neale B	UKBB	European	2017	0.009653	0.00176	4.18e-08	+	332021	0	332021	1	-	Neale-B_UKBB_EUR_2017
rs181209	rs181209	chr16:28514854	T/G	Fluid intelligence score	-	Neale B	UKBB	European	2017	-0.05075	0.009535	1.026e-07	-	108818	0	108818	1	-	Neale-B_UKBB_EUR_2017
rs181209	rs181209	chr16:28514854	T/G	Hip circumference	EFO_0005093	Neale B	UKBB	European	2017	0.02803	0.002553	4.943e-28	+	336601	0	336601	1	IVNT	Neale-B_UKBB_EUR_2017
rs181209	rs181209	chr16:28514854	T/G	Impedance of leg left	-	Neale B	UKBB	European	2017	-0.01078	0.002351	4.511e-06	-	331296	0	331296	1	IVNT	Neale-B_UKBB_EUR_2017
rs181209	rs181209	chr16:28514854	T/G	Impedance of leg right	-	Neale B	UKBB	European	2017	-0.01086	0.002333	3.264e-06	-	331301	0	331301	1	IVNT	Neale-B_UKBB_EUR_2017
rs181209	rs181209	chr16:28514854	T/G	Leg fat mass left	-	Neale B	UKBB	European	2017	0.01797	0.002038	1.184e-18	+	331275	0	331275	1	IVNT	Neale-B_UKBB_EUR_2017
rs181209	rs181209	chr16:28514854	T/G	Leg fat mass right	-	Neale B	UKBB	European	2017	0.01779	0.002062	6.218e-18	+	331293	0	331293	1	IVNT	Neale-B_UKBB_EUR_2017
rs181209	rs181209	chr16:28514854	T/G	Leg fat percentage left	-	Neale B	UKBB	European	2017	0.01182	0.001613	2.313e-13	+	331278	0	331278	1	IVNT	Neale-B_UKBB_EUR_2017
rs181209	rs181209	chr16:28514854	T/G	Leg fat percentage right	-	Neale B	UKBB	European	2017	0.01149	0.001633	2.021e-12	+	331296	0	331296	1	IVNT	Neale-B_UKBB_EUR_2017
rs181209	rs181209	chr16:28514854	T/G	Leg fat-free mass left	-	Neale B	UKBB	European	2017	0.01313	0.001698	1.049e-14	+	331258	0	331258	1	IVNT	Neale-B_UKBB_EUR_2017
rs181209	rs181209	chr16:28514854	T/G	Leg fat-free mass right	-	Neale B	UKBB	European	2017	0.0126	0.001698	1.136e-13	+	331285	0	331285	1	IVNT	Neale-B_UKBB_EUR_2017
rs181209	rs181209	chr16:28514854	T/G	Leg predicted mass left	-	Neale B	UKBB	European	2017	0.01309	0.001687	8.379e-15	+	331253	0	331253	1	IVNT	Neale-B_UKBB_EUR_2017
rs181209	rs181209	chr16:28514854	T/G	Leg predicted mass right	-	Neale B	UKBB	European	2017	0.01244	0.001686	1.625e-13	+	331285	0	331285	1	IVNT	Neale-B_UKBB_EUR_2017
rs181209	rs181209	chr16:28514854	T/G	Qualifications: college or university degree	EFO_0004784	Neale B	UKBB	European	2017	-0.007065	0.001209	5.078e-09	-	334070	106305	227765	1	risk diff	Neale-B_UKBB_EUR_2017
rs181209	rs181209	chr16:28514854	T/G	Qualifications: none	EFO_0004784	Neale B	UKBB	European	2017	0.005035	0.0009801	2.794e-07	+	334070	57567	276503	1	risk diff	Neale-B_UKBB_EUR_2017
rs181209	rs181209	chr16:28514854	T/G	Suffer from nerves	-	Neale B	UKBB	European	2017	0.005169	0.001079	1.667e-06	+	325248	69352	255896	1	risk diff	Neale-B_UKBB_EUR_2017
rs181209	rs181209	chr16:28514854	T/G	Trunk fat mass	EFO_0005409	Neale B	UKBB	European	2017	0.0271	0.002596	1.655e-25	+	331093	0	331093	1	IVNT	Neale-B_UKBB_EUR_2017
rs181209	rs181209	chr16:28514854	T/G	Trunk fat percentage	-	Neale B	UKBB	European	2017	0.02386	0.00237	7.942e-24	+	331113	0	331113	1	IVNT	Neale-B_UKBB_EUR_2017
rs181209	rs181209	chr16:28514854	T/G	Types of physical activity in last 4 weeks: light diy	EFO_0008002	Neale B	UKBB	European	2017	-0.007863	0.00129	1.102e-09	-	335599	175376	160223	1	risk diff	Neale-B_UKBB_EUR_2017
rs181209	rs181209	chr16:28514854	T/G	Usual walking pace	EFO_0008002	Neale B	UKBB	European	2017	-0.007793	0.001575	7.548e-07	-	335349	0	335349	1	-	Neale-B_UKBB_EUR_2017
rs181209	rs181209	chr16:28514854	T/G	Waist circumference	EFO_0004342	Neale B	UKBB	European	2017	0.02176	0.002283	1.584e-21	+	336639	0	336639	1	IVNT	Neale-B_UKBB_EUR_2017
rs181209	rs181209	chr16:28514854	T/G	Weight	EFO_0004338	Neale B	UKBB	European	2017	0.02212	0.002253	9.49e-23	+	336227	0	336227	1	IVNT	Neale-B_UKBB_EUR_2017
rs181209	rs181209	chr16:28514854	T/G	Whole body fat mass	-	Neale B	UKBB	European	2017	0.02535	0.002516	6.996e-24	+	330762	0	330762	1	IVNT	Neale-B_UKBB_EUR_2017
rs181209	rs181209	chr16:28514854	T/G	Whole body fat-free mass	-	Neale B	UKBB	European	2017	0.009085	0.001631	2.537e-08	+	331291	0	331291	1	IVNT	Neale-B_UKBB_EUR_2017
rs181209	rs181209	chr16:28514854	T/G	Whole body water mass	-	Neale B	UKBB	European	2017	0.008909	0.001633	4.911e-08	+	331315	0	331315	1	IVNT	Neale-B_UKBB_EUR_2017

## Sheet: Table S6-CTRB1
Table S6. Associations of eQTL rs8051363 (cis-pQTL for CTRB1) with other traits using phenoscanner
SNP	RSID	Pos (hg19)	Alleles	trait	efo	study	PMID	Ancestry	year	tissue	exp_gene	exp_ensembl	probe	Beta	SE	P-value	direction	n	n_studies	unit	dataset
rs8051363	rs8051363	chr16:75255217	A/G	Gene expression	NCIT_C16608	BIOSQTL	27918533	European	2017	Whole blood	BCAR1	ENSG00000050820	ENSG00000050820	NA	NA	2.977e-20	+	2116	1	-	BIOSQTL_eQTL_EUR_2017
rs8051363	rs8051363	chr16:75255217	A/G	Gene expression	NCIT_C16608	BIOSQTL	27918533	European	2017	Whole blood	CFDP1;RP11-77K12.1	ENSG00000153774;ENSG00000261717	ENSG00000153774;ENSG00000261717	NA	NA	8.788e-10	+	2116	1	-	BIOSQTL_eQTL_EUR_2017
rs8051363	rs8051363	chr16:75255217	A/G	Gene expression	NCIT_C16608	BIOSQTL	27918533	European	2017	Whole blood	CFDP1	ENSG00000153774	ENSG00000153774	NA	NA	8.664e-09	+	2116	1	-	BIOSQTL_eQTL_EUR_2017
rs8051363	rs8051363	chr16:75255217	A/G	Gene expression	NCIT_C16608	BIOSQTL	27918533	European	2017	Whole blood	TMEM170A	ENSG00000166822	ENSG00000166822	NA	NA	4.863e-06	-	2116	1	-	BIOSQTL_eQTL_EUR_2017
rs8051363	rs8051363	chr16:75255217	A/G	Gene expression	NCIT_C16608	GTEx	25954001	Unspecified	2015	Nerve tibial	BCAR1	ENSG00000050820.12	-	-0.2381	0.04192	4.374e-08	-	256	1	-	GTEx-V6p_eQTL_EUR_2016
rs8051363	rs8051363	chr16:75255217	A/G	Gene expression	NCIT_C16608	GTEx	25954001	Unspecified	2015	Pancreas	CTRB2	ENSG00000168928.8	-	0.6021	0.1167	1.072e-06	+	149	1	-	GTEx-V6p_eQTL_EUR_2016
rs8051363	rs8051363	chr16:75255217	A/G	Gene expression	NCIT_C16608	GTEx	25954001	Unspecified	2015	Nerve tibial	BCAR1	ENSG00000050820.12	-	-0.2372	0.03207	1.478e-12	-	361	1	-	GTEx-V7_eQTL_EUR_2017
rs8051363	rs8051363	chr16:75255217	A/G	Gene expression	NCIT_C16608	GTEx	25954001	Unspecified	2015	Pancreas	CTRB2	ENSG00000168928.8	-	0.5981	0.0686	1.681e-15	+	220	1	-	GTEx-V7_eQTL_EUR_2017
rs8051363	rs8051363	chr16:75255217	A/G	Gene expression	NCIT_C16608	GTEx	25954001	Unspecified	2015	Pancreas	CTRB1	ENSG00000168925.6	-	-0.2528	0.05152	2.038e-06	-	220	1	-	GTEx-V7_eQTL_EUR_2017
rs8051363	rs8051363	chr16:75255217	A/G	Gene expression	NCIT_C16608	eQTLGen	eQTLGen	European	2018	Whole blood	CFDP1	ENSG00000153774	-	NA	NA	2.6e-29	+	31684	37	-	eQTLGen_eQTL_EUR_2018
rs8051363	rs8051363	chr16:75255217	A/G	Gene expression	NCIT_C16608	eQTLGen	eQTLGen	European	2018	Whole blood	ADAT1	ENSG00000065457	-	NA	NA	1.3e-19	-	31684	37	-	eQTLGen_eQTL_EUR_2018
rs8051363	rs8051363	chr16:75255217	A/G	Gene expression	NCIT_C16608	eQTLGen	eQTLGen	European	2018	Whole blood	BCAR1	ENSG00000050820	-	NA	NA	7.06e-15	+	30859	35	-	eQTLGen_eQTL_EUR_2018
rs8051363	rs8051363	chr16:75255217	A/G	Gene expression	NCIT_C16608	eQTLGen	eQTLGen	European	2018	Whole blood	TMEM170A	ENSG00000166822	-	NA	NA	3.03e-13	-	31086	35	-	eQTLGen_eQTL_EUR_2018

## Sheet: Table S7- MR power calculation
Table S7. MR power claculation
Sample Size	Proportion of type 1 diabetic cases	*R2	OR	Power
25427	0.38	4.6	1.13	1
25427	0.38	4.6	2.02	1
OR is the odds of T1D for a unit change in protein levels,
using a range of plausible effect sizes from the literature.
*R2 is the median variance explained per protein by its specific cis SNPs.

## Sheet: Table S8-validation_ELISA
Table S8. Validation of commercial ELISA assays for the 3 proteins
Protein	Name of assay	Catalogue	Detectable range	Samples need to be diluted prior to assay	Optimal dilution ratio for human serum	Range of recovery rates after dilution	Presence of matrix interference affecting linearity	Intra-assay precision (CV%) (number of samples)	Acceptable threshold for intra-assay precision (CV)	Range of recovery rates after spiking with the protein
EBI-3	Cloud-clone Corp.	SCD206HU	1.37-333 pg/mL	Yes	1:4 to 1:8	100% -102%	Yes, but not above a certain threshold		<15%	100%-104%
SIRPG	RayBiotech Life	ELH-SIRPG	0.41-40 ng/mL	Yes	1:8 to 1:16	97% - 100%	No	4.96% (N=24)	<15%	114%-132%
CTRB1	Reddot Biotech Inc	RDR-CTRB1-HU	1.56-50 ng/mL	Yes	1：200 to 1:800	96%-100%	No	14.31% (N=30)	<15%	106%-119%
CV: Coefficient of variation= Standard deviation of the values of the replicates / Average of the values of the replicates.
Inter-assay % CV of less than 10 between replicates is demonstrating that an assay was well-run and the results are precise.

## Sheet: Table S9-cis and trans-pQTL
Table S9A. MR analysis of the effect of CTRB1 on type 1 diabetes using both cis and trans-pQTLs
Method	No. SNPs	MR Beta (SE)	MR OR	95% CI	P-value
MR Egger	12	-0.03 (0.07)	0.97	0.84 - 1.12	0.716
Weighted median	12	-0.08 (0.04)	0.92	0.86 - 0.99	0.028
Inverse‐variance weighted	12	-0.10 (0.03)	0.91	0.85 - 0.97	0.003
Simple mode	12	-0.06 (0.05)	0.94	0.86 -1.04	0.242
Weighted mode	12	-0.03 (0.08)	0.97	0.84 - 1.13	0.746
Beta: effect on type 1 diabetes, SE: standard error, MR: Mendelian randomization,
OR: odds ratio, CI: confidence interval,
Results express changes in type 1 diabetes risk per one standard deviation increase in protein level
Table S9B. Sensitivity MR analyses for detection of pleiotropy in the multi-SNP MR for CTRB1
Heterogeneity Test			Pleiotropy
Method	Cochran's Q Statistic	Q p-value	MR-Egger		MR-PRESSO
			intercept (95% CI)	p-value	Global Test	p-value	Distortion test	p-value
MR Egger	22.61	0.012	-0.04 (-0.10-0.02)	0.308	32.56	0.006	-21.83	0.528
Inverse‐variance weighted	25.23	0.008

[truncated: 1 more sheets: Table S10- cis-pQTL and PAV]
